# Supplementary material for: High specific phosphopeptides enrichment by titanium silicalite with post-treatment of desilication
Source: Royal Society of Chemistry journal article supplement (doi:10.1039/c3ay00064h), 2013-01-01
Supplement: c3ay00064h.xlsx [file c3ay00064h.xlsx]

## Sheet: Table S3
Table S3. Phospho(STY) sites obtained by first T-TS-1 enrichment step from HeLa cell lysate tryptic digest.
id	Protein Group IDs	Positions	Position	Known Site	Peptide IDs	Mod. Peptide IDs	Best Localization Evidence ID	Best Localization MS/MS ID	Best Localization Raw File	Best Localization Scan Number	Best Identification Evidence ID	Best Identification MS/MS ID	Best Identification Raw File	Best Identification Scan Number	Proteins	Leading Proteins	Protein	Protein Names	Gene Names	Protein Descriptions	Uniprot	Localization Prob	Score Diff	Localization Prob Experiment1	Score Diff Experiment1	PEP Experiment1	Score Experiment1	Localization Prob Experiment2	Score Diff Experiment2	PEP Experiment2	Score Experiment2	Localization Prob Experiment3	Score Diff Experiment3	PEP Experiment3	Score Experiment3	Diagnostic peak	Number of Phospho (STY)	Amino Acid	Sequence Window	Motifs	Random Match	PEP	Score	Modified Sequence	Phospho (STY) Probabilities	Phospho (STY) Score Diffs	Position in peptide	Charge	m/z
0	0	1034	1034		1704	2149	5482	9726	TSenrich-100ughela-2	21259	5482	9726	TSenrich-100ughela-2	21259	CON__ENSEMBL:ENSBTAP00000007350	CON__ENSEMBL:ENSBTAP00000007350	CON__ENSEMBL:ENSBTAP00000007350			>ENSEMBL:ENSBTAP00000007350 (Bos taurus) similar to Complement C4-A precursor		0.998104	27.2097					0.998104	27.2097	0.126391	64.114						3	S	DMTEQWSMLPPET	CK1	0.143	0.126391	64.114	_pYLDMpTEQWpSMLPPETK_	Y(1)LDMT(0.999)EQWS(0.998)MLPPET(0.002)K	Y(45.64)LDMT(32.42)EQWS(27.21)MLPPET(-27.21)K	9	2	1104.91
1	4	2	2	N-acetylserine	1242	1549;1550	3990	7268	TSenrich-100ughela-2	22087	3990	7268	TSenrich-100ughela-2	22087	CON__P08729;IPI00306959;CON__Q3KNV1;IPI00792841;IPI00954463	CON__P08729	CON__P08729	Cytokeratin-7;Keratin, type II cytoskeletal 7;Keratin-7;Sarcolectin;Type-II keratin Kb7;Cytokeratin-7;Keratin, type II cytoskeletal 7;Keratin-7;Sarcolectin;Type-II keratin Kb7;KRT7 protein;Putative uncharacterized protein;cDNA FLJ46620 fis, clone TLUNG2000654, highly similar to Keratin, type II cytoskeletal 7;KRT7 protein;Putative uncharacterized protein	KRT7;SCL;KRT7;SCL;KRT7;KRT7	>P08729 SWISS-PROT:P08729 Tax_Id=9606 Gene_Symbol=KRT7 Keratin, type II cytoskeletal 7;Keratin, type II cytoskeletal 7;>Q3KNV1 TREMBL:Q3KNV1;Q96GE1 Tax_Id=9606 Gene_Symbol=KRT7 keratin 7;cDNA FLJ46620 fis, clone TLUNG2000654, highly similar to Keratin, typ	P08729;Q3KNV1;Q96GE1;B3KY79	0.999952	43.156	0.999917	40.7576	0.00299869	113.65	0.999952	43.156	6.11457e-05	125.52	9.79391e-10	-90.0429	0.000867241	117.5		2	S	_____MSIHFSSP	GSK3	0.081	6.11457e-05	125.52	_(ac)pSIHFSpSPVFTSR_	S(1)IHFS(0.015)S(0.985)PVFTSR	S(43.16)IHFS(-18.08)S(18.08)PVFT(-45.06)S(-68.35)R	1	2	783.823
2	4	7	7	Phosphoserine	1242	1549;1550	3990	7268	TSenrich-100ughela-2	22087	3990	7268	TSenrich-100ughela-2	22087	CON__P08729;IPI00306959;CON__Q3KNV1;IPI00792841;IPI00954463	CON__P08729	CON__P08729	Cytokeratin-7;Keratin, type II cytoskeletal 7;Keratin-7;Sarcolectin;Type-II keratin Kb7;Cytokeratin-7;Keratin, type II cytoskeletal 7;Keratin-7;Sarcolectin;Type-II keratin Kb7;KRT7 protein;Putative uncharacterized protein;cDNA FLJ46620 fis, clone TLUNG2000654, highly similar to Keratin, type II cytoskeletal 7;KRT7 protein;Putative uncharacterized protein	KRT7;SCL;KRT7;SCL;KRT7;KRT7	>P08729 SWISS-PROT:P08729 Tax_Id=9606 Gene_Symbol=KRT7 Keratin, type II cytoskeletal 7;Keratin, type II cytoskeletal 7;>Q3KNV1 TREMBL:Q3KNV1;Q96GE1 Tax_Id=9606 Gene_Symbol=KRT7 keratin 7;cDNA FLJ46620 fis, clone TLUNG2000654, highly similar to Keratin, typ	P08729;Q3KNV1;Q96GE1;B3KY79	0.984662	18.0838	0.989479	19.7474	0.00299869	113.65	0.984662	18.0838	6.11457e-05	125.52	0.989124	19.6509	0.000867241	117.5		2	S	MSIHFSSPVFTSR	Polo box;Proline-directed	0.00405	6.11457e-05	125.52	_(ac)pSIHFSpSPVFTSR_	S(1)IHFS(0.015)S(0.985)PVFTSR	S(43.16)IHFS(-18.08)S(18.08)PVFT(-45.06)S(-68.35)R	6	2	783.823
3	6	13	13	Phosphoserine	1032	1292	3337	6147	TSenrich-100ughela-2	34591	3328	6132	TSenrich-100ughela-3	13968	CON__Q04695;IPI00450768;CON__Q9QWL7;IPI00791852;IPI00791156;IPI00180956;IPI00240503;IPI00798387;IPI00794047;IPI00879511;IPI00793646;IPI00792629;IPI00796480	CON__Q04695	CON__Q04695	39.1;Cytokeratin-17;Keratin, type I cytoskeletal 17;Keratin-17;39.1;Cytokeratin-17;Keratin, type I cytoskeletal 17;Keratin-17;Radiated keratinocyte mRNA 266 (keratin-related protein);Cytokeratin-17;Keratin, type I cytoskeletal 17;Keratin-17;Putative uncharacterized protein ENSP00000382160;Putative uncharacterized protein ENSP00000319235;cDNA FLJ56708, highly similar to Keratin, type I cytoskeleta…	KRT17;KRT17;Krt1-17;Krt17	>Q04695 SWISS-PROT:Q04695 Tax_Id=9606 Gene_Symbol=KRT17 Keratin, type I cytoskeletal 17;Keratin, type I cytoskeletal 17;>Q9QWL7 SWISS-PROT:Q9QWL7 Tax_Id=10090 Gene_Symbol=Krt17 Keratin, type I cytoskeletal 17;42 kDa protein;31 kDa protein;Uncharacterized p	Q04695;Q14666;Q9QWL7;A8MW45;C9JH30;B4E2P9;B4DJM5	0.48221	4.7172	0.59362	6.08404	0.110603	76.315	0.48221	4.7172	0.357153	65.199	0.459902	3.28752	0.0156322	90.413		1	S	QFTSSSSIKGSSG	CK1;GSK3	0.081	0.0156322	90.413	_QFTSSSpSIKGSSGLGGGSSR_	QFT(0.029)S(0.163)S(0.163)S(0.163)S(0.482)IKGSSGLGGGSSR	QFT(-12.17)S(-4.72)S(-4.72)S(-4.72)S(4.72)IKGS(-35.61)S(-35.61)GLGGGS(-63.31)S(-65.2)R	7	3	656.3
4	7	451	451		228	294	724	1290	TSenrich-100ughela-3	13809	724	1290	TSenrich-100ughela-3	13809	IPI00000033;IPI00644625;IPI00478977	IPI00000033	IPI00000033	ALL1-fused gene from chromosome 9 protein;Myeloid/lymphoid or mixed-lineage leukemia translocated to chromosome 3 protein;Protein AF-9;YEATS domain-containing protein 3;cDNA, FLJ93363, highly similar to Homo sapiens myeloid/lymphoid or mixed-lineage leukemia (trithorax homolog, Drosophila); translocated to, 3 (MLLT3), mRNA;cDNA FLJ58676, highly similar to Protein AF-9;cDNA FLJ53222, highly simila…	AF9;MLLT3;YEATS3;LTG9/MLLT3;DKFZp686D09204;MLLT3;RP11-15P13.2-002;hCG_1811108;MLLT3;RP11-15P13.2-006	cDNA FLJ58676, highly similar to Protein AF-9;Myeloid/lymphoid or mixed-lineage leukemia;Myeloid/lymphoid or mixed-lineage leukemia	P42568;B2R7B3;B7Z4N5;B7Z755;Q6LEQ8;Q6MZE2;Q8IVB0;B1APT5;B1APT6	1	113.331									1	113.331	0.00172598	113.33		3	S	IMKDLHSDDNEEE			0.00172598	113.33	_DLHpSDDNEEEpSDEVEDNDNDpSEMERPVNR_	DLHS(1)DDNEEES(1)DEVEDNDNDS(1)EMERPVNR	DLHS(113.33)DDNEEES(113.33)DEVEDNDNDS(113.33)EMERPVNR	4	3	1225.09
5	7	458	458		228	294	724	1290	TSenrich-100ughela-3	13809	724	1290	TSenrich-100ughela-3	13809	IPI00000033;IPI00644625;IPI00478977	IPI00000033	IPI00000033	ALL1-fused gene from chromosome 9 protein;Myeloid/lymphoid or mixed-lineage leukemia translocated to chromosome 3 protein;Protein AF-9;YEATS domain-containing protein 3;cDNA, FLJ93363, highly similar to Homo sapiens myeloid/lymphoid or mixed-lineage leukemia (trithorax homolog, Drosophila); translocated to, 3 (MLLT3), mRNA;cDNA FLJ58676, highly similar to Protein AF-9;cDNA FLJ53222, highly simila…	AF9;MLLT3;YEATS3;LTG9/MLLT3;DKFZp686D09204;MLLT3;RP11-15P13.2-002;hCG_1811108;MLLT3;RP11-15P13.2-006	cDNA FLJ58676, highly similar to Protein AF-9;Myeloid/lymphoid or mixed-lineage leukemia;Myeloid/lymphoid or mixed-lineage leukemia	P42568;B2R7B3;B7Z4N5;B7Z755;Q6LEQ8;Q6MZE2;Q8IVB0;B1APT5;B1APT6	1	113.331									1	113.331	0.00172598	113.33		3	S	DDNEEESDEVEDN			0.00172598	113.33	_DLHpSDDNEEEpSDEVEDNDNDpSEMERPVNR_	DLHS(1)DDNEEES(1)DEVEDNDNDS(1)EMERPVNR	DLHS(113.33)DDNEEES(113.33)DEVEDNDNDS(113.33)EMERPVNR	11	3	1225.09
6	7	468	468		228	294	724	1290	TSenrich-100ughela-3	13809	724	1290	TSenrich-100ughela-3	13809	IPI00000033;IPI00644625;IPI00478977	IPI00000033	IPI00000033	ALL1-fused gene from chromosome 9 protein;Myeloid/lymphoid or mixed-lineage leukemia translocated to chromosome 3 protein;Protein AF-9;YEATS domain-containing protein 3;cDNA, FLJ93363, highly similar to Homo sapiens myeloid/lymphoid or mixed-lineage leukemia (trithorax homolog, Drosophila); translocated to, 3 (MLLT3), mRNA;cDNA FLJ58676, highly similar to Protein AF-9;cDNA FLJ53222, highly simila…	AF9;MLLT3;YEATS3;LTG9/MLLT3;DKFZp686D09204;MLLT3;RP11-15P13.2-002;hCG_1811108;MLLT3;RP11-15P13.2-006	cDNA FLJ58676, highly similar to Protein AF-9;Myeloid/lymphoid or mixed-lineage leukemia;Myeloid/lymphoid or mixed-lineage leukemia	P42568;B2R7B3;B7Z4N5;B7Z755;Q6LEQ8;Q6MZE2;Q8IVB0;B1APT5;B1APT6	1	113.331									1	113.331	0.00172598	113.33		3	S	EDNDNDSEMERPV	CK2	0.117	0.00172598	113.33	_DLHpSDDNEEEpSDEVEDNDNDpSEMERPVNR_	DLHS(1)DDNEEES(1)DEVEDNDNDS(1)EMERPVNR	DLHS(113.33)DDNEEES(113.33)DEVEDNDNDS(113.33)EMERPVNR	21	3	1225.09
7	8	94	94	Phosphoserine	179	232	585	1055	TSenrich-100ughela-1	13069	585	1055	TSenrich-100ughela-1	13069	IPI00218624;IPI00218620;IPI00000192;IPI00218622;IPI00218619;IPI00218618;IPI00217930;IPI00748258;IPI00218621;IPI00218617	IPI00218624	IPI00218624	Bax antagonist selected in saccharomyces 1;Negative regulatory element-binding protein;Protein DBP-5;Protein SON;SON3;Bax antagonist selected in saccharomyces 1;Negative regulatory element-binding protein;Protein DBP-5;Protein SON;SON3;Bax antagonist selected in saccharomyces 1;Negative regulatory element-binding protein;Protein DBP-5;Protein SON;SON3;Bax antagonist selected in saccharomyces 1;Ne…	C21orf50;DBP5;HSPC310;HSPC312;KIAA1019;NREBP;SON;C21orf50;DBP5;HSPC310;HSPC312;KIAA1019;NREBP;SON;C21orf50;DBP5;HSPC310;HSPC312;KIAA1019;NREBP;SON;C21orf50;DBP5;HSPC310;HSPC312;KIAA1019;NREBP;SON;C21orf50;DBP5;HSPC310;HSPC312;KIAA1019;NREBP;SON;hCG_2008565;C21orf50;DBP5;HSPC310;HSPC312;KIAA1019;NREBP;SON;C21orf50;DBP5;HSPC310;HSPC312;KIAA1019;NREBP;SON;C21orf50;DBP5;HSPC310;HSPC312;KIAA1019;NREBP…	Isoform I of Protein SON;Isoform D of Protein SON;Isoform F of Protein SON;Isoform G of Protein SON;Isoform C of Protein SON;Isoform B of Protein SON;Isoform J of Protein SON;Isoform A of Protein SON;Isoform E of Protein SON;Isoform H of Protein SON	P18583-9;P18583;P18583-5;P18583-1;P18583-7;P18583-4;D3DSF5;P18583-3;P18583-10;P18583-2;P18583-6;A0JLP4;D3DSF6;D3DSF7;Q3SWV4;Q6PKE0;P18583-8	0.997919	26.8294	0.997919	26.8294	0.0766994	76.601					0.829932	7.0916	0.0180921	67.708		1	S	RKSRCVSVQTDPT	CAMK2;CK1	0.002856	0.0766994	76.601	_CVpSVQTDPTDEIPTKK_	CVS(0.998)VQT(0.002)DPTDEIPTKK	CVS(26.83)VQT(-26.83)DPT(-49.87)DEIPT(-70.83)KK	3	2	949.434
8	8	1596	1596		333	437	1082	1863	TSenrich-100ughela-2	14309	1082	1863	TSenrich-100ughela-2	14309	IPI00218624;IPI00218620;IPI00000192;IPI00218622;IPI00218619;IPI00218618;IPI00217930;IPI00748258;IPI00218621	IPI00218624	IPI00218624	Bax antagonist selected in saccharomyces 1;Negative regulatory element-binding protein;Protein DBP-5;Protein SON;SON3;Bax antagonist selected in saccharomyces 1;Negative regulatory element-binding protein;Protein DBP-5;Protein SON;SON3;Bax antagonist selected in saccharomyces 1;Negative regulatory element-binding protein;Protein DBP-5;Protein SON;SON3;Bax antagonist selected in saccharomyces 1;Ne…	C21orf50;DBP5;HSPC310;HSPC312;KIAA1019;NREBP;SON;C21orf50;DBP5;HSPC310;HSPC312;KIAA1019;NREBP;SON;C21orf50;DBP5;HSPC310;HSPC312;KIAA1019;NREBP;SON;C21orf50;DBP5;HSPC310;HSPC312;KIAA1019;NREBP;SON;C21orf50;DBP5;HSPC310;HSPC312;KIAA1019;NREBP;SON;hCG_2008565;C21orf50;DBP5;HSPC310;HSPC312;KIAA1019;NREBP;SON;C21orf50;DBP5;HSPC310;HSPC312;KIAA1019;NREBP;SON;C21orf50;DBP5;HSPC310;HSPC312;KIAA1019;NREBP…	Isoform I of Protein SON;Isoform D of Protein SON;Isoform F of Protein SON;Isoform G of Protein SON;Isoform C of Protein SON;Isoform B of Protein SON;Isoform J of Protein SON;Isoform A of Protein SON;Isoform E of Protein SON	P18583-9;P18583;P18583-5;P18583-1;P18583-7;P18583-4;D3DSF5;P18583-3;P18583-10;P18583-2;P18583-6;A0JLP4;D3DSF6;D3DSF7;Q3SWV4;Q6PKE0	0.750802	4.79209					0.750802	4.79209	0.0468981	87.552						1	S	VCAAGTSPVGEIG	Proline-directed	0.05	0.0468981	87.552	_EM(ox)EHNTVCAAGTpSPVGEIGEEK_	EMEHNTVCAAGT(0.249)S(0.751)PVGEIGEEK	EMEHNT(-37.57)VCAAGT(-4.79)S(4.79)PVGEIGEEK	13	3	814.338
9	8	1988	1988		1216	1509	3887	7085	TSenrich-100ughela-3	12351	3887	7085	TSenrich-100ughela-3	12351	IPI00218624;IPI00218620;IPI00000192;IPI00218622;IPI00218619;IPI00218618;IPI00217930;IPI00748258;IPI00218621	IPI00218624	IPI00218624	Bax antagonist selected in saccharomyces 1;Negative regulatory element-binding protein;Protein DBP-5;Protein SON;SON3;Bax antagonist selected in saccharomyces 1;Negative regulatory element-binding protein;Protein DBP-5;Protein SON;SON3;Bax antagonist selected in saccharomyces 1;Negative regulatory element-binding protein;Protein DBP-5;Protein SON;SON3;Bax antagonist selected in saccharomyces 1;Ne…	C21orf50;DBP5;HSPC310;HSPC312;KIAA1019;NREBP;SON;C21orf50;DBP5;HSPC310;HSPC312;KIAA1019;NREBP;SON;C21orf50;DBP5;HSPC310;HSPC312;KIAA1019;NREBP;SON;C21orf50;DBP5;HSPC310;HSPC312;KIAA1019;NREBP;SON;C21orf50;DBP5;HSPC310;HSPC312;KIAA1019;NREBP;SON;hCG_2008565;C21orf50;DBP5;HSPC310;HSPC312;KIAA1019;NREBP;SON;C21orf50;DBP5;HSPC310;HSPC312;KIAA1019;NREBP;SON;C21orf50;DBP5;HSPC310;HSPC312;KIAA1019;NREBP…	Isoform I of Protein SON;Isoform D of Protein SON;Isoform F of Protein SON;Isoform G of Protein SON;Isoform C of Protein SON;Isoform B of Protein SON;Isoform J of Protein SON;Isoform A of Protein SON;Isoform E of Protein SON	P18583-9;P18583;P18583-5;P18583-1;P18583-7;P18583-4;D3DSF5;P18583-3;P18583-10;P18583-2;P18583-6;A0JLP4;D3DSF6;D3DSF7;Q3SWV4;Q6PKE0	1	85.8474									1	85.8474	0.011793	93.216		3	S	SVGRRRSFSISPS	AURORA;AURORA-A;CAMK2;CHK1;GSK3;PKA;PKA/AKT;PKD	0.00111111	0.011793	93.216	_pSFpSIpSPSRR_	S(1)FS(1)IS(0.961)PS(0.039)RR	S(85.85)FS(46.7)IS(13.87)PS(-13.87)RR	1	2	638.73
10	8	1990	1990		1216	1509	3887	7085	TSenrich-100ughela-3	12351	3887	7085	TSenrich-100ughela-3	12351	IPI00218624;IPI00218620;IPI00000192;IPI00218622;IPI00218619;IPI00218618;IPI00217930;IPI00748258;IPI00218621	IPI00218624	IPI00218624	Bax antagonist selected in saccharomyces 1;Negative regulatory element-binding protein;Protein DBP-5;Protein SON;SON3;Bax antagonist selected in saccharomyces 1;Negative regulatory element-binding protein;Protein DBP-5;Protein SON;SON3;Bax antagonist selected in saccharomyces 1;Negative regulatory element-binding protein;Protein DBP-5;Protein SON;SON3;Bax antagonist selected in saccharomyces 1;Ne…	C21orf50;DBP5;HSPC310;HSPC312;KIAA1019;NREBP;SON;C21orf50;DBP5;HSPC310;HSPC312;KIAA1019;NREBP;SON;C21orf50;DBP5;HSPC310;HSPC312;KIAA1019;NREBP;SON;C21orf50;DBP5;HSPC310;HSPC312;KIAA1019;NREBP;SON;C21orf50;DBP5;HSPC310;HSPC312;KIAA1019;NREBP;SON;hCG_2008565;C21orf50;DBP5;HSPC310;HSPC312;KIAA1019;NREBP;SON;C21orf50;DBP5;HSPC310;HSPC312;KIAA1019;NREBP;SON;C21orf50;DBP5;HSPC310;HSPC312;KIAA1019;NREBP…	Isoform I of Protein SON;Isoform D of Protein SON;Isoform F of Protein SON;Isoform G of Protein SON;Isoform C of Protein SON;Isoform B of Protein SON;Isoform J of Protein SON;Isoform A of Protein SON;Isoform E of Protein SON	P18583-9;P18583;P18583-5;P18583-1;P18583-7;P18583-4;D3DSF5;P18583-3;P18583-10;P18583-2;P18583-6;A0JLP4;D3DSF6;D3DSF7;Q3SWV4;Q6PKE0	0.999979	46.7044									0.999979	46.7044	0.011793	93.216		3	S	GRRRSFSISPSRR	CAMK2;GSK3;PKA/AKT	0.00111111	0.011793	93.216	_pSFpSIpSPSRR_	S(1)FS(1)IS(0.961)PS(0.039)RR	S(85.85)FS(46.7)IS(13.87)PS(-13.87)RR	3	2	638.73
11	8	1992	1992		1216	1509	3887	7085	TSenrich-100ughela-3	12351	3887	7085	TSenrich-100ughela-3	12351	IPI00218624;IPI00218620;IPI00000192;IPI00218622;IPI00218619;IPI00218618;IPI00217930;IPI00748258;IPI00218621	IPI00218624	IPI00218624	Bax antagonist selected in saccharomyces 1;Negative regulatory element-binding protein;Protein DBP-5;Protein SON;SON3;Bax antagonist selected in saccharomyces 1;Negative regulatory element-binding protein;Protein DBP-5;Protein SON;SON3;Bax antagonist selected in saccharomyces 1;Negative regulatory element-binding protein;Protein DBP-5;Protein SON;SON3;Bax antagonist selected in saccharomyces 1;Ne…	C21orf50;DBP5;HSPC310;HSPC312;KIAA1019;NREBP;SON;C21orf50;DBP5;HSPC310;HSPC312;KIAA1019;NREBP;SON;C21orf50;DBP5;HSPC310;HSPC312;KIAA1019;NREBP;SON;C21orf50;DBP5;HSPC310;HSPC312;KIAA1019;NREBP;SON;C21orf50;DBP5;HSPC310;HSPC312;KIAA1019;NREBP;SON;hCG_2008565;C21orf50;DBP5;HSPC310;HSPC312;KIAA1019;NREBP;SON;C21orf50;DBP5;HSPC310;HSPC312;KIAA1019;NREBP;SON;C21orf50;DBP5;HSPC310;HSPC312;KIAA1019;NREBP…	Isoform I of Protein SON;Isoform D of Protein SON;Isoform F of Protein SON;Isoform G of Protein SON;Isoform C of Protein SON;Isoform B of Protein SON;Isoform J of Protein SON;Isoform A of Protein SON;Isoform E of Protein SON	P18583-9;P18583;P18583-5;P18583-1;P18583-7;P18583-4;D3DSF5;P18583-3;P18583-10;P18583-2;P18583-6;A0JLP4;D3DSF6;D3DSF7;Q3SWV4;Q6PKE0	0.960622	13.8729									0.960622	13.8729	0.011793	93.216		3	S	RRSFSISPSRRSR	CDK1;CDK2;CK1;Proline-directed	0.0057	0.011793	93.216	_pSFpSIpSPSRR_	S(1)FS(1)IS(0.961)PS(0.039)RR	S(85.85)FS(46.7)IS(13.87)PS(-13.87)RR	5	2	638.73
12	9	135	135	Phosphoserine	1642	2071	5274	9326	TSenrich-100ughela-1	11266	5274	9326	TSenrich-100ughela-1	11266	IPI00000398;IPI00020484;IPI00793551;IPI00789679;IPI00855788;IPI00900282;IPI00908380	IPI00000398	IPI00000398	Nucleolar and spindle-associated protein 1;cDNA FLJ78441, highly similar to Homo sapiens nucleolar and spindle associated protein 1 (NUSAP1),mRNA;Nucleolar and spindle-associated protein 1;Nucleolar and spindle-associated protein 1;Nucleolar and spindle-associated protein 1;Nucleolar and spindle-associated protein 1;cDNA FLJ54110, highly similar to Homo sapiens nucleolar and spindle associated pr…	ANKT;BM-037;NUSAP1;PRO0310;ANKT;BM-037;NUSAP1;PRO0310;ANKT;BM-037;NUSAP1;PRO0310;ANKT;BM-037;NUSAP1;PRO0310;ANKT;BM-037;NUSAP1;PRO0310	Isoform 1 of Nucleolar and spindle-associated protein 1;Isoform 2 of Nucleolar and spindle-associated protein 1;Isoform 5 of Nucleolar and spindle-associated protein 1;Isoform 3 of Nucleolar and spindle-associated protein 1;Isoform 4 of Nucleolar and spind	Q9BXS6-1;Q9BXS6;A8K4B4;Q9BXS6-2;Q9BXS6-5;Q9BXS6-3;Q9BXS6-4;B4DDF1	0.999999	62.1693	0.999999	62.1693	0.0100662	94.592										1	S	ATAKVPSPPDEHQ	CK2;ERK/MAPK;Proline-directed	0.0034	0.0100662	94.592	_VPpSPPDEHQEAENAVSSGNR_	VPS(1)PPDEHQEAENAVSSGNR	VPS(62.17)PPDEHQEAENAVS(-62.17)S(-62.17)GNR	3	3	733.982
13	10	695	695	Phosphoserine	682	860	2141	3735	TSenrich-100ughela-2	22288	2140	3731	TSenrich-100ughela-1	20213	IPI00000425	IPI00000425	IPI00000425	Lysosomal H(+)-transporting ATPase V0 subunit a2;TJ6;Vacuolar proton translocating ATPase 116 kDa subunit a isoform 2;V-type proton ATPase 116 kDa subunit a isoform 2;cDNA FLJ56962, highly similar to Vacuolar proton translocating ATPase 116 kDa subunit a isoform 2	ATP6V0A2	V-type proton ATPase 116 kDa subunit a isoform 2	Q9Y487;B4DQF7	0.9962	24.3189	0.999972	46.6475	9.15926e-35	199.16	0.9962	24.3189	0.000248819	117.8	0.886054	9.85721	0.00242217	108.03		1	S	TLIRKDSEEEVSL	CAMK2;CHK1;CHK1/2;CK2;PKA;PKD	0.003192	9.15926e-35	199.16	_KDpSEEEVSLLGSQDIEEGNHQVEDGCR_	KDS(0.996)EEEVS(0.004)LLGSQDIEEGNHQVEDGCR	KDS(24.32)EEEVS(-24.32)LLGS(-39.39)QDIEEGNHQVEDGCR	3	3	1047.11
14	11	240	240	Phosphoserine	816	1037	2743	5094	TSenrich-100ughela-3	11240	2743	5094	TSenrich-100ughela-3	11240	IPI00956015;IPI00000634;IPI00807498	IPI00956015	IPI00956015	Coiled-coil domain-containing protein 6;Papillary thyroid carcinoma-encoded protein;Protein H4;CCDC6 protein	CCDC6;D10S170;TST1;CCDC6	Coiled-coil domain-containing protein 6;Coiled-coil domain-containing protein 6;CCDC6 protein (Fragment)	Q16204;Q05CP8	1	96.3729									1	96.3729	0.0163562	96.373		2	S	KLDQPVSAPPSPR	GSK3	0.081	0.0163562	96.373	_LDQPVpSAPPpSPR_	LDQPVS(1)APPS(1)PR	LDQPVS(96.37)APPS(96.37)PR	6	2	712.305
15	11	244	244	Phosphoserine	816	1037	2743	5094	TSenrich-100ughela-3	11240	2743	5094	TSenrich-100ughela-3	11240	IPI00956015;IPI00000634;IPI00807498	IPI00956015	IPI00956015	Coiled-coil domain-containing protein 6;Papillary thyroid carcinoma-encoded protein;Protein H4;CCDC6 protein	CCDC6;D10S170;TST1;CCDC6	Coiled-coil domain-containing protein 6;Coiled-coil domain-containing protein 6;CCDC6 protein (Fragment)	Q16204;Q05CP8	1	96.3729									1	96.3729	0.0163562	96.373		2	S	PVSAPPSPRDISM	CDK1;CK1;CK2;ERK/MAPK;Proline-directed;WW GroupIV	0.0023175	0.0163562	96.373	_LDQPVpSAPPpSPR_	LDQPVS(1)APPS(1)PR	LDQPVS(96.37)APPS(96.37)PR	10	2	712.305
16	12	174	174	Phosphoserine	1254	1563	4017	7313	TSenrich-100ughela-2	23677	4016	7308	TSenrich-100ughela-1	22208	IPI00000686	IPI00000686	IPI00000686	Probable RNA-binding protein 19;RNA-binding motif protein 19;cDNA FLJ77989, highly similar to Homo sapiens RNA binding motif protein 19, mRNA;cDNA, FLJ95445, highly similar to Homo sapiens RNA binding motif protein 19 (RBM19), mRNA	KIAA0682;RBM19	Probable RNA-binding protein 19	Q9Y4C8;A8K5X9	0.998539	33.3776	0.999497	34.9582	0.0262936	117.65	0.998539	33.3776	0.0576629	115.45						3	S	DYLNFDSDSGQES			0.0262936	117.65	_SKPASDYLNFDpSDpSGQEpSEEEGAGEDLEEEASLEPK_	S(0.001)KPAS(0.001)DY(0.004)LNFDS(0.999)DS(0.999)GQES(0.996)EEEGAGEDLEEEASLEPK	S(-38.72)KPAS(-38.72)DY(-26.21)LNFDS(33.38)DS(33.38)GQES(26.21)EEEGAGEDLEEEAS(-34.49)LEPK	12	3	1376.86
17	12	176	176	Phosphoserine	1254	1563	4017	7313	TSenrich-100ughela-2	23677	4016	7308	TSenrich-100ughela-1	22208	IPI00000686	IPI00000686	IPI00000686	Probable RNA-binding protein 19;RNA-binding motif protein 19;cDNA FLJ77989, highly similar to Homo sapiens RNA binding motif protein 19, mRNA;cDNA, FLJ95445, highly similar to Homo sapiens RNA binding motif protein 19 (RBM19), mRNA	KIAA0682;RBM19	Probable RNA-binding protein 19	Q9Y4C8;A8K5X9	0.998785	33.3776	0.999453	34.2998	0.0262936	117.65	0.998785	33.3776	0.0576629	115.45						3	S	LNFDSDSGQESEE	CK2;F box bTrCP;GSK3	0.000624338	0.0262936	117.65	_SKPASDYLNFDpSDpSGQEpSEEEGAGEDLEEEASLEPK_	S(0.001)KPAS(0.001)DY(0.004)LNFDS(0.999)DS(0.999)GQES(0.996)EEEGAGEDLEEEASLEPK	S(-38.72)KPAS(-38.72)DY(-26.21)LNFDS(33.38)DS(33.38)GQES(26.21)EEEGAGEDLEEEAS(-34.49)LEPK	14	3	1376.86
18	12	180	180	Phosphoserine	1254	1563	4017	7313	TSenrich-100ughela-2	23677	4016	7308	TSenrich-100ughela-1	22208	IPI00000686	IPI00000686	IPI00000686	Probable RNA-binding protein 19;RNA-binding motif protein 19;cDNA FLJ77989, highly similar to Homo sapiens RNA binding motif protein 19, mRNA;cDNA, FLJ95445, highly similar to Homo sapiens RNA binding motif protein 19 (RBM19), mRNA	KIAA0682;RBM19	Probable RNA-binding protein 19	Q9Y4C8;A8K5X9	0.996428	26.2122	0.999453	34.2998	0.0262936	117.65	0.996428	26.2122	0.0576629	115.45						3	S	SDSGQESEEEGAG	CK1;CK2;F box bTrCP	0.000624338	0.0262936	117.65	_SKPASDYLNFDpSDpSGQEpSEEEGAGEDLEEEASLEPK_	S(0.001)KPAS(0.001)DY(0.004)LNFDS(0.999)DS(0.999)GQES(0.996)EEEGAGEDLEEEASLEPK	S(-38.72)KPAS(-38.72)DY(-26.21)LNFDS(33.38)DS(33.38)GQES(26.21)EEEGAGEDLEEEAS(-34.49)LEPK	18	3	1376.86
19	12	949	949	Phosphoserine	1418	1787	4597	8169	TSenrich-100ughela-2	33335	4597	8169	TSenrich-100ughela-2	33335	IPI00000686;IPI00788256	IPI00000686	IPI00000686	Probable RNA-binding protein 19;RNA-binding motif protein 19;cDNA FLJ77989, highly similar to Homo sapiens RNA binding motif protein 19, mRNA;cDNA, FLJ95445, highly similar to Homo sapiens RNA binding motif protein 19 (RBM19), mRNA	KIAA0682;RBM19	Probable RNA-binding protein 19;11 kDa protein	Q9Y4C8;A8K5X9	0.999508	34.6585	0.339365	0	0.642487	60.746	0.999508	34.6585	0.000121372	118.02						2	S	LEQLEGSDSDSEE	CK2;GSK3;NEK6	0.076	0.000121372	118.02	_SVVLDEILEQLEGpSDpSDSEEQTLQL_	SVVLDEILEQLEGS(1)DS(0.96)DS(0.033)EEQT(0.007)LQL	S(-58.53)VVLDEILEQLEGS(34.66)DS(14.66)DS(-14.66)EEQT(-21.6)LQL	14	3	979.424
20	12	951	951	Phosphoserine	1418	1787	4597	8169	TSenrich-100ughela-2	33335	4597	8169	TSenrich-100ughela-2	33335	IPI00000686;IPI00788256	IPI00000686	IPI00000686	Probable RNA-binding protein 19;RNA-binding motif protein 19;cDNA FLJ77989, highly similar to Homo sapiens RNA binding motif protein 19, mRNA;cDNA, FLJ95445, highly similar to Homo sapiens RNA binding motif protein 19 (RBM19), mRNA	KIAA0682;RBM19	Probable RNA-binding protein 19;11 kDa protein	Q9Y4C8;A8K5X9	0.960429	14.658	0.339411	0	0.642487	60.746	0.960429	14.658	0.000121372	118.02						2	S	QLEGSDSDSEEQT	CK2	0.117	0.000121372	118.02	_SVVLDEILEQLEGpSDpSDSEEQTLQL_	SVVLDEILEQLEGS(1)DS(0.96)DS(0.033)EEQT(0.007)LQL	S(-58.53)VVLDEILEQLEGS(34.66)DS(14.66)DS(-14.66)EEQT(-21.6)LQL	16	3	979.424
21	13	961	961	Phosphoserine	416	539	1332	2298	TSenrich-100ughela-2	18189	1329	2294	TSenrich-100ughela-3	18126	IPI00000728;IPI00219505;IPI00219504	IPI00000728	IPI00000728	Deubiquitinating enzyme 15;Ubiquitin carboxyl-terminal hydrolase 15;Ubiquitin thioesterase 15;Ubiquitin-specific-processing protease 15;Unph-2;Unph4;Ubiquitin carboxyl-terminal hydrolase;Deubiquitinating enzyme 15;Ubiquitin carboxyl-terminal hydrolase 15;Ubiquitin thioesterase 15;Ubiquitin-specific-processing protease 15;Unph-2;Unph4;Deubiquitinating enzyme 15;Ubiquitin carboxyl-terminal hydrolas…	KIAA0529;USP15;KIAA0529;USP15;KIAA0529;USP15	Isoform 1 of Ubiquitin carboxyl-terminal hydrolase 15;Isoform 3 of Ubiquitin carboxyl-terminal hydrolase 15;Isoform 2 of Ubiquitin carboxyl-terminal hydrolase 15	Q9Y4E8-1;Q9Y4E8;Q08AL5;Q9Y4E8-3;Q9Y4E8-2;Q2NL66	0.991498	24.1524	0.4	5.68434e-14	0.112805	100.78	0.991498	24.1524	0.02022	110.56	1	66.413	5.40115e-21	169.83		2	S	TGIPLESDEDSND	CK2;GSK3	0.081	5.40115e-21	169.83	_GASAATGIPLEpSDEDpSNDNDNDIENENCMHTN_	GAS(0.008)AAT(0.009)GIPLES(0.991)DEDS(0.992)NDNDNDIENENCMHTN	GAS(-24.55)AAT(-24.15)GIPLES(24.15)DEDS(24.15)NDNDNDIENENCMHT(-42.87)N	12	3	1203.77
22	13	965	965	Phosphoserine	416	539	1332	2298	TSenrich-100ughela-2	18189	1329	2294	TSenrich-100ughela-3	18126	IPI00000728;IPI00219505;IPI00219504	IPI00000728	IPI00000728	Deubiquitinating enzyme 15;Ubiquitin carboxyl-terminal hydrolase 15;Ubiquitin thioesterase 15;Ubiquitin-specific-processing protease 15;Unph-2;Unph4;Ubiquitin carboxyl-terminal hydrolase;Deubiquitinating enzyme 15;Ubiquitin carboxyl-terminal hydrolase 15;Ubiquitin thioesterase 15;Ubiquitin-specific-processing protease 15;Unph-2;Unph4;Deubiquitinating enzyme 15;Ubiquitin carboxyl-terminal hydrolas…	KIAA0529;USP15;KIAA0529;USP15;KIAA0529;USP15	Isoform 1 of Ubiquitin carboxyl-terminal hydrolase 15;Isoform 3 of Ubiquitin carboxyl-terminal hydrolase 15;Isoform 2 of Ubiquitin carboxyl-terminal hydrolase 15	Q9Y4E8-1;Q9Y4E8;Q08AL5;Q9Y4E8-3;Q9Y4E8-2;Q2NL66	0.99153	24.1524	0.4	-1.13687e-13	0.112805	100.78	0.99153	24.1524	0.02022	110.56	1	66.413	5.40115e-21	169.83		2	S	LESDEDSNDNDND	CK1	0.143	5.40115e-21	169.83	_GASAATGIPLEpSDEDpSNDNDNDIENENCMHTN_	GAS(0.008)AAT(0.009)GIPLES(0.991)DEDS(0.992)NDNDNDIENENCMHTN	GAS(-24.55)AAT(-24.15)GIPLES(24.15)DEDS(24.15)NDNDNDIENENCMHT(-42.87)N	16	3	1203.77
23	14	223	223		786;1554	997;998;1964	5030	8914	TSenrich-100ughela-1	13450	2620	4838	TSenrich-100ughela-3	15777	IPI00000733	IPI00000733	IPI00000733	U3 small nucleolar RNA-associated protein 18 homolog;WD repeat-containing protein 50;cDNA, FLJ95176, Homo sapiens CGI-48 protein (CGI-48), mRNA	CDABP0061;CGI-48;UTP18;WDR50	U3 small nucleolar RNA-associated protein 18 homolog	Q9Y5J1;B2RAX6	0.413231	1.00609	0.413231	1.00609	1.5471e-186	222.32					0.996861	24.6852	1.97491e-73	240.99		2	S	TKRKTSSDDESEE	CK2;GSK3	0.081	1.97491e-73	240.99	_TSpSDDEpSEEDEDDLLQR_	T(0.262)S(0.328)S(0.413)DDES(0.997)EEDEDDLLQR	T(-2)S(-1.01)S(1.01)DDES(25.31)EEDEDDLLQR	3	2	1071.87
24	14	227	227		786;1554	997;998;1964	5030	8914	TSenrich-100ughela-1	13450	2620	4838	TSenrich-100ughela-3	15777	IPI00000733	IPI00000733	IPI00000733	U3 small nucleolar RNA-associated protein 18 homolog;WD repeat-containing protein 50;cDNA, FLJ95176, Homo sapiens CGI-48 protein (CGI-48), mRNA	CDABP0061;CGI-48;UTP18;WDR50	U3 small nucleolar RNA-associated protein 18 homolog	Q9Y5J1;B2RAX6	0.996578	25.3055	0.996578	25.3055	1.5471e-186	222.32					1	145.037	1.97491e-73	240.99		2	S	TSSDDESEEDEDD	CK1;CK2	0.117	1.97491e-73	240.99	_TSpSDDEpSEEDEDDLLQR_	T(0.262)S(0.328)S(0.413)DDES(0.997)EEDEDDLLQR	T(-2)S(-1.01)S(1.01)DDES(25.31)EEDEDDLLQR	7	2	1071.87
25	14	138	138		1647	2076	5286	9343	TSenrich-100ughela-3	9201	5286	9343	TSenrich-100ughela-3	9201	IPI00000733	IPI00000733	IPI00000733	U3 small nucleolar RNA-associated protein 18 homolog;WD repeat-containing protein 50;cDNA, FLJ95176, Homo sapiens CGI-48 protein (CGI-48), mRNA	CDABP0061;CGI-48;UTP18;WDR50	U3 small nucleolar RNA-associated protein 18 homolog	Q9Y5J1;B2RAX6	1	86.7738									1	86.7738	0.0457956	86.774		2	S	VQEHEDSGDSEVE			0.0457956	86.774	_VQEHEDpSGDpSEVENEAK_	VQEHEDS(1)GDS(1)EVENEAK	VQEHEDS(86.77)GDS(86.77)EVENEAK	7	2	1031.37
26	14	141	141		1647	2076	5286	9343	TSenrich-100ughela-3	9201	5286	9343	TSenrich-100ughela-3	9201	IPI00000733	IPI00000733	IPI00000733	U3 small nucleolar RNA-associated protein 18 homolog;WD repeat-containing protein 50;cDNA, FLJ95176, Homo sapiens CGI-48 protein (CGI-48), mRNA	CDABP0061;CGI-48;UTP18;WDR50	U3 small nucleolar RNA-associated protein 18 homolog	Q9Y5J1;B2RAX6	1	86.7738									1	86.7738	0.0457956	86.774		2	S	HEDSGDSEVENEA	CK1;CK2	0.081	0.0457956	86.774	_VQEHEDpSGDpSEVENEAK_	VQEHEDS(1)GDS(1)EVENEAK	VQEHEDS(86.77)GDS(86.77)EVENEAK	10	2	1031.37
27	17	56	56		1276	1588	4085	7409	TSenrich-100ughela-2	16150	4084	7408	TSenrich-100ughela-1	14774	IPI00000858;IPI00941607;IPI00941723;IPI00921016;IPI00922214;IPI00946182;IPI00642023;IPI00972969	IPI00000858	IPI00000858	cDNA FLJ56180, highly similar to Negative elongation factor E;Negative elongation factor E;RNA-binding protein RD;RD RNA binding protein;cDNA FLJ52247, highly similar to Negative elongation factor E;RD RNA binding protein;cDNA FLJ56553, highly similar to Negative elongation factor E;RD RNA binding protein, isoform CRA_a;RD RNA binding protein;RD RNA binding protein;Nuclear protein;cDNA FLJ61007, …	NELFE;RD;RDBP;DADB-122G4.4-007;DAMC-178C20.5-007;DAQB-331I12.3-007;DASS-107J21.4-007;RDBP;XXbac-BCX116I9.1-007;XXbac-BPG116M5.4-007;DADB-122G4.4-011;DAMC-178C20.5-011;DAQB-331I12.3-011;DASS-107J21.4-011;RDBP;XXbac-BCX116I9.1-011;XXbac-BPG116M5.4-011;hCG_43696;DADB-122G4.4-010;DAMC-178C20.5-010;DAQB-331I12.3-010;DASS-107J21.4-010;RDBP;XXbac-BCX116I9.1-010;XXbac-BPG116M5.4-010;DADB-122G4.4-009;DAMC…	cDNA FLJ56180, highly similar to Negative elongation factor E;Negative elongation factor E;RD RNA binding protein;cDNA FLJ52247, highly similar to Negative elongation factor E;cDNA FLJ56553, highly similar to Negative elongation factor E;RD RNA binding pro	B4DYX9;P18615;A2ABK1;B4DUN1;A2ABK2;B7Z6T4;A2ABK3;A2ABK4;Q9BQJ6;B4DZZ3	0.5	0	0.409676	-1.58649	3.58349e-73	237.52	0.5	0	2.73685e-58	228.17						1	S	QGGVKRSLSEQPV	AURORA;AURORA-1;CK2	0.020748	3.58349e-73	237.52	_pSLSEQPVMDTATATEQAK_	S(0.5)LS(0.5)EQPVMDTATATEQAK	S(0)LS(0)EQPVMDT(-108.85)AT(-146.91)AT(-174.93)EQAK	1	2	993.94
28	17	58	58		1276	1588	4085	7409	TSenrich-100ughela-2	16150	4084	7408	TSenrich-100ughela-1	14774	IPI00000858;IPI00941607;IPI00941723;IPI00921016;IPI00922214;IPI00946182;IPI00642023;IPI00972969	IPI00000858	IPI00000858	cDNA FLJ56180, highly similar to Negative elongation factor E;Negative elongation factor E;RNA-binding protein RD;RD RNA binding protein;cDNA FLJ52247, highly similar to Negative elongation factor E;RD RNA binding protein;cDNA FLJ56553, highly similar to Negative elongation factor E;RD RNA binding protein, isoform CRA_a;RD RNA binding protein;RD RNA binding protein;Nuclear protein;cDNA FLJ61007, …	NELFE;RD;RDBP;DADB-122G4.4-007;DAMC-178C20.5-007;DAQB-331I12.3-007;DASS-107J21.4-007;RDBP;XXbac-BCX116I9.1-007;XXbac-BPG116M5.4-007;DADB-122G4.4-011;DAMC-178C20.5-011;DAQB-331I12.3-011;DASS-107J21.4-011;RDBP;XXbac-BCX116I9.1-011;XXbac-BPG116M5.4-011;hCG_43696;DADB-122G4.4-010;DAMC-178C20.5-010;DAQB-331I12.3-010;DASS-107J21.4-010;RDBP;XXbac-BCX116I9.1-010;XXbac-BPG116M5.4-010;DADB-122G4.4-009;DAMC…	cDNA FLJ56180, highly similar to Negative elongation factor E;Negative elongation factor E;RD RNA binding protein;cDNA FLJ52247, highly similar to Negative elongation factor E;cDNA FLJ56553, highly similar to Negative elongation factor E;RD RNA binding pro	B4DYX9;P18615;A2ABK1;B4DUN1;A2ABK2;B7Z6T4;A2ABK3;A2ABK4;Q9BQJ6;B4DZZ3	0.5	0	0.590324	1.58649	3.58349e-73	237.52	0.5	0	2.73685e-58	228.17						1	S	GVKRSLSEQPVMD	CAMK2;CHK1;PKA;PKD	0.003024	3.58349e-73	237.52	_pSLSEQPVMDTATATEQAK_	S(0.5)LS(0.5)EQPVMDTATATEQAK	S(0)LS(0)EQPVMDT(-108.85)AT(-146.91)AT(-174.93)EQAK	3	2	993.94
29	20	1766	1766	Phosphoserine	1110	1381;1382	3586	6585	TSenrich-100ughela-2	15930	3584	6582	TSenrich-100ughela-3	16210	IPI00000897	IPI00000897	IPI00000897	Down-regulated in human cancers protein;Probable helicase with zinc finger domain;HELZ protein	DRHC;HELZ;KIAA0054	HELZ protein	P42694;B7ZLW2;Q6PGP6	0.31385	0	0.091247	-6.51057	1.36249e-33	194.48	0.31385	0	1.02048e-24	178.68	0.207178	-3.29859	4.98462e-44	208.9		1	S	QRRISSSSVQPCS			4.98462e-44	208.9	_RISSpSSVQPCSEEVSTPQDSLAQCK_	RIS(0.186)S(0.186)S(0.314)S(0.314)VQPCS(0.001)EEVSTPQDSLAQCK	RIS(-2.28)S(-2.28)S(0)S(0)VQPCS(-27.33)EEVS(-77.11)T(-96.53)PQDS(-123.47)LAQCK	5	3	954.088
30	20	1767	1767		1110	1381;1382	3586	6585	TSenrich-100ughela-2	15930	3584	6582	TSenrich-100ughela-3	16210	IPI00000897	IPI00000897	IPI00000897	Down-regulated in human cancers protein;Probable helicase with zinc finger domain;HELZ protein	DRHC;HELZ;KIAA0054	HELZ protein	P42694;B7ZLW2;Q6PGP6	0.31385	0	0.091247	-6.51057	1.36249e-33	194.48	0.31385	0	1.02048e-24	178.68	0.207178	-3.29859	4.98462e-44	208.9		1	S	RRISSSSVQPCSE	CK1	0.081	4.98462e-44	208.9	_RISSpSSVQPCSEEVSTPQDSLAQCK_	RIS(0.186)S(0.186)S(0.314)S(0.314)VQPCS(0.001)EEVSTPQDSLAQCK	RIS(-2.28)S(-2.28)S(0)S(0)VQPCS(-27.33)EEVS(-77.11)T(-96.53)PQDS(-123.47)LAQCK	6	3	954.088
31	22	728	728		238	306	759	1346	TSenrich-100ughela-2	12897	757	1340	TSenrich-100ughela-3	13559	IPI00001632;IPI00936576;IPI00872465	IPI00001632	IPI00001632	Uncharacterized protein KIAA1522;Putative uncharacterized protein KIAA1522;Putative uncharacterized protein KIAA1522;Uncharacterized protein KIAA1522	KIAA1522;KIAA1522;KIAA1522	Isoform 2 of Uncharacterized protein KIAA1522;Uncharacterized protein;Isoform 1 of Uncharacterized protein KIAA1522	Q9P206-2;Q9P206;C9JH84;B5MDY0;Q9P206-1	0.996219	28.6247	0.999773	38.0348	0.321988	66.784	0.996219	28.6247	0.515842	56.188	0.999619	34.9432	0.0659349	82.346		2	S	VISKDQSPPPSPP	CHK1;CK1;GSK3;PKD;Proline-directed	0.020748	0.0659349	82.346	_DQpSPPPpSPPPSYHPPPPPTK_	DQS(0.996)PPPS(0.961)PPPS(0.028)Y(0.01)HPPPPPT(0.005)K	DQS(28.62)PPPS(15.84)PPPS(-15.84)Y(-20.97)HPPPPPT(-24.38)K	3	3	760.664
32	22	732	732		238	306	759	1346	TSenrich-100ughela-2	12897	757	1340	TSenrich-100ughela-3	13559	IPI00001632;IPI00936576;IPI00872465	IPI00001632	IPI00001632	Uncharacterized protein KIAA1522;Putative uncharacterized protein KIAA1522;Putative uncharacterized protein KIAA1522;Uncharacterized protein KIAA1522	KIAA1522;KIAA1522;KIAA1522	Isoform 2 of Uncharacterized protein KIAA1522;Uncharacterized protein;Isoform 1 of Uncharacterized protein KIAA1522	Q9P206-2;Q9P206;C9JH84;B5MDY0;Q9P206-1	0.961338	15.8442	0.993165	21.9909	0.321988	66.784	0.961338	15.8442	0.515842	56.188	0.973287	15.9956	0.0659349	82.346		2	S	DQSPPPSPPPSYH	CK1;ERK/MAPK;GSK3;Proline-directed;WW GroupIV	0.0023175	0.0659349	82.346	_DQpSPPPpSPPPSYHPPPPPTK_	DQS(0.996)PPPS(0.961)PPPS(0.028)Y(0.01)HPPPPPT(0.005)K	DQS(28.62)PPPS(15.84)PPPS(-15.84)Y(-20.97)HPPPPPT(-24.38)K	7	3	760.664
33	22	1038	1038		746	945	2486	4562	TSenrich-100ughela-1	13432	2486	4562	TSenrich-100ughela-1	13432	IPI00001632;IPI00936576;IPI00872465	IPI00001632	IPI00001632	Uncharacterized protein KIAA1522;Putative uncharacterized protein KIAA1522;Putative uncharacterized protein KIAA1522;Uncharacterized protein KIAA1522	KIAA1522;KIAA1522;KIAA1522	Isoform 2 of Uncharacterized protein KIAA1522;Uncharacterized protein;Isoform 1 of Uncharacterized protein KIAA1522	Q9P206-2;Q9P206;C9JH84;B5MDY0;Q9P206-1	0.989091	21.8574	0.989091	21.8574	0.037765	101.06										1	S	GVPPPASPSYPRA	ERK/MAPK;Proline-directed;WW GroupIV	0.0023175	0.037765	101.06	_KPSVGVPPPApSPSYPR_	KPSVGVPPPAS(0.989)PS(0.006)Y(0.004)PR	KPS(-61.64)VGVPPPAS(21.86)PS(-21.86)Y(-23.46)PR	11	3	572.622
34	22	220	220		1151	1431	3715	6828	TSenrich-100ughela-2	21660	3715	6828	TSenrich-100ughela-2	21660	IPI00001632;IPI00936576;IPI00872465	IPI00001632	IPI00001632	Uncharacterized protein KIAA1522;Putative uncharacterized protein KIAA1522;Putative uncharacterized protein KIAA1522;Uncharacterized protein KIAA1522	KIAA1522;KIAA1522;KIAA1522	Isoform 2 of Uncharacterized protein KIAA1522;Uncharacterized protein;Isoform 1 of Uncharacterized protein KIAA1522	Q9P206-2;Q9P206;C9JH84;B5MDY0;Q9P206-1	0.908923	9.99116	0.193619	-6.19592	0.000419703	123.32	0.908923	9.99116	8.67672e-05	130.92	0.881341	8.70842	0.0765434	77.025		1	S	RRRERRSTVLGLP	PKA	0.042	8.67672e-05	130.92	_RpSTVLGLPQHVQK_	RS(0.909)T(0.091)VLGLPQHVQK	RS(9.99)T(-9.99)VLGLPQHVQK	2	3	514.943
35	23	956	956	Phosphoserine	101	138	334	539	TSenrich-100ughela-3	13585	333	538	TSenrich-100ughela-3	13486	IPI00001735;IPI00923596;IPI00952937;IPI00923436;IPI00952657;IPI00923531;IPI00939494	IPI00001735	IPI00001735	CTG repeat protein 26;Nuclear receptor corepressor 2;Silencing mediator of retinoic acid and thyroid hormone receptor;SMAP270;T3 receptor-associating factor;Thyroid-, retinoic-acid-receptor-associated corepressor;Putative uncharacterized protein NCOR2;CTG repeat protein 26;Nuclear receptor corepressor 2;Silencing mediator of retinoic acid and thyroid hormone receptor;SMAP270;T3 receptor-associati…	CTG26;NCOR2;CTG26;NCOR2;NCOR2;CTG26;NCOR2;NCOR2;CTG26;NCOR2	Isoform 1 of Nuclear receptor corepressor 2;Isoform 3 of Nuclear receptor corepressor 2;Uncharacterized protein;Isoform 4 of Nuclear receptor corepressor 2;Uncharacterized protein;Isoform 5 of Nuclear receptor corepressor 2;204 kDa protein	Q9Y618-1;Q9Y618;C9JQE8;Q9Y618-3;C9J0Q5;Q9Y618-4;C9J7T7;Q9BT61;Q9Y618-5;C9J239;C9JE98	1	44.6083									1	44.6083	0.0638831	78.787		1	S	DPRANASPQKPLD	CDK1;CDK2;Proline-directed	0.0057	0.0638831	78.787	_ANApSPQKPLDLK_	ANAS(1)PQKPLDLK	ANAS(44.61)PQKPLDLK	4	3	454.566
36	23	745	745	Phosphoserine	426	550	1371	2358	TSenrich-100ughela-3	13211	1371	2358	TSenrich-100ughela-3	13211	IPI00001735;IPI00923596;IPI00952937	IPI00001735	IPI00001735	CTG repeat protein 26;Nuclear receptor corepressor 2;Silencing mediator of retinoic acid and thyroid hormone receptor;SMAP270;T3 receptor-associating factor;Thyroid-, retinoic-acid-receptor-associated corepressor;Putative uncharacterized protein NCOR2;CTG repeat protein 26;Nuclear receptor corepressor 2;Silencing mediator of retinoic acid and thyroid hormone receptor;SMAP270;T3 receptor-associati…	CTG26;NCOR2;CTG26;NCOR2;NCOR2	Isoform 1 of Nuclear receptor corepressor 2;Isoform 3 of Nuclear receptor corepressor 2;Uncharacterized protein	Q9Y618-1;Q9Y618;C9JQE8;Q9Y618-3;C9J0Q5	0.493921	0									0.493921	0	6.02457e-10	140.76		3	S	PATVNNSSDTESI	CK1	0.143	6.02457e-10	140.76	_GECSGPATVNNpSSDTEpSIPpSPHTEAAK_	GECSGPATVNNS(0.494)S(0.494)DT(0.214)ES(0.798)IPS(0.799)PHT(0.202)EAAK	GECS(-66.61)GPAT(-36.02)VNNS(0)S(0)DT(-6)ES(6)IPS(6)PHT(-6)EAAK	12	3	995.042
37	23	746	746	Phosphoserine	426	550	1371	2358	TSenrich-100ughela-3	13211	1371	2358	TSenrich-100ughela-3	13211	IPI00001735;IPI00923596;IPI00952937	IPI00001735	IPI00001735	CTG repeat protein 26;Nuclear receptor corepressor 2;Silencing mediator of retinoic acid and thyroid hormone receptor;SMAP270;T3 receptor-associating factor;Thyroid-, retinoic-acid-receptor-associated corepressor;Putative uncharacterized protein NCOR2;CTG repeat protein 26;Nuclear receptor corepressor 2;Silencing mediator of retinoic acid and thyroid hormone receptor;SMAP270;T3 receptor-associati…	CTG26;NCOR2;CTG26;NCOR2;NCOR2	Isoform 1 of Nuclear receptor corepressor 2;Isoform 3 of Nuclear receptor corepressor 2;Uncharacterized protein	Q9Y618-1;Q9Y618;C9JQE8;Q9Y618-3;C9J0Q5	0.493921	0									0.493921	0	6.02457e-10	140.76		3	S	ATVNNSSDTESIP	CK2;GSK3	0.081	6.02457e-10	140.76	_GECSGPATVNNpSSDTEpSIPpSPHTEAAK_	GECSGPATVNNS(0.494)S(0.494)DT(0.214)ES(0.798)IPS(0.799)PHT(0.202)EAAK	GECS(-66.61)GPAT(-36.02)VNNS(0)S(0)DT(-6)ES(6)IPS(6)PHT(-6)EAAK	13	3	995.042
38	23	750	750	Phosphoserine	426	550	1371	2358	TSenrich-100ughela-3	13211	1371	2358	TSenrich-100ughela-3	13211	IPI00001735;IPI00923596;IPI00952937	IPI00001735	IPI00001735	CTG repeat protein 26;Nuclear receptor corepressor 2;Silencing mediator of retinoic acid and thyroid hormone receptor;SMAP270;T3 receptor-associating factor;Thyroid-, retinoic-acid-receptor-associated corepressor;Putative uncharacterized protein NCOR2;CTG repeat protein 26;Nuclear receptor corepressor 2;Silencing mediator of retinoic acid and thyroid hormone receptor;SMAP270;T3 receptor-associati…	CTG26;NCOR2;CTG26;NCOR2;NCOR2	Isoform 1 of Nuclear receptor corepressor 2;Isoform 3 of Nuclear receptor corepressor 2;Uncharacterized protein	Q9Y618-1;Q9Y618;C9JQE8;Q9Y618-3;C9J0Q5	0.798466	5.99511									0.798466	5.99511	6.02457e-10	140.76		3	S	NSSDTESIPSPHT	CK1	0.143	6.02457e-10	140.76	_GECSGPATVNNpSSDTEpSIPpSPHTEAAK_	GECSGPATVNNS(0.494)S(0.494)DT(0.214)ES(0.798)IPS(0.799)PHT(0.202)EAAK	GECS(-66.61)GPAT(-36.02)VNNS(0)S(0)DT(-6)ES(6)IPS(6)PHT(-6)EAAK	17	3	995.042
39	23	753	753	Phosphoserine	426	550	1371	2358	TSenrich-100ughela-3	13211	1371	2358	TSenrich-100ughela-3	13211	IPI00001735;IPI00923596;IPI00952937	IPI00001735	IPI00001735	CTG repeat protein 26;Nuclear receptor corepressor 2;Silencing mediator of retinoic acid and thyroid hormone receptor;SMAP270;T3 receptor-associating factor;Thyroid-, retinoic-acid-receptor-associated corepressor;Putative uncharacterized protein NCOR2;CTG repeat protein 26;Nuclear receptor corepressor 2;Silencing mediator of retinoic acid and thyroid hormone receptor;SMAP270;T3 receptor-associati…	CTG26;NCOR2;CTG26;NCOR2;NCOR2	Isoform 1 of Nuclear receptor corepressor 2;Isoform 3 of Nuclear receptor corepressor 2;Uncharacterized protein	Q9Y618-1;Q9Y618;C9JQE8;Q9Y618-3;C9J0Q5	0.798524	5.99511									0.798524	5.99511	6.02457e-10	140.76		3	S	DTESIPSPHTEAA	CK1;Proline-directed	0.05	6.02457e-10	140.76	_GECSGPATVNNpSSDTEpSIPpSPHTEAAK_	GECSGPATVNNS(0.494)S(0.494)DT(0.214)ES(0.798)IPS(0.799)PHT(0.202)EAAK	GECS(-66.61)GPAT(-36.02)VNNS(0)S(0)DT(-6)ES(6)IPS(6)PHT(-6)EAAK	20	3	995.042
40	23	149	149	Phosphoserine	820	1041	2751	5106	TSenrich-100ughela-2	21813	2750	5105	TSenrich-100ughela-1	20476	IPI00001735;IPI00923596;IPI00952937;IPI00923436;IPI00952657;IPI00923531;IPI00878709;IPI00879943	IPI00001735	IPI00001735	CTG repeat protein 26;Nuclear receptor corepressor 2;Silencing mediator of retinoic acid and thyroid hormone receptor;SMAP270;T3 receptor-associating factor;Thyroid-, retinoic-acid-receptor-associated corepressor;Putative uncharacterized protein NCOR2;CTG repeat protein 26;Nuclear receptor corepressor 2;Silencing mediator of retinoic acid and thyroid hormone receptor;SMAP270;T3 receptor-associati…	CTG26;NCOR2;CTG26;NCOR2;NCOR2;CTG26;NCOR2;NCOR2;CTG26;NCOR2;NCOR2	Isoform 1 of Nuclear receptor corepressor 2;Isoform 3 of Nuclear receptor corepressor 2;Uncharacterized protein;Isoform 4 of Nuclear receptor corepressor 2;Uncharacterized protein;Isoform 5 of Nuclear receptor corepressor 2;Uncharacterized protein;29 kDa p	Q9Y618-1;Q9Y618;C9JQE8;Q9Y618-3;C9J0Q5;Q9Y618-4;C9J7T7;Q9BT61;Q9Y618-5;C9J239;C9JE98;C9J330	0.971006	14.3648	0.994817	21.9477	0.000942083	104.33	0.971006	14.3648	0.000941968	104.3						2	S	GKLEPVSPPSPPH	ERK/MAPK;Proline-directed;WW GroupIV	0.0023175	0.000942083	104.33	_LEPVpSPPpSPPHTDPELELVPPR_	LEPVS(0.971)PPS(0.821)PPHT(0.208)DPELELVPPR	LEPVS(14.36)PPS(6.46)PPHT(-6.46)DPELELVPPR	5	3	855.068
41	23	152	152	Phosphoserine	820	1041	2751	5106	TSenrich-100ughela-2	21813	2750	5105	TSenrich-100ughela-1	20476	IPI00001735;IPI00923596;IPI00952937;IPI00923436;IPI00952657;IPI00923531;IPI00878709;IPI00879943	IPI00001735	IPI00001735	CTG repeat protein 26;Nuclear receptor corepressor 2;Silencing mediator of retinoic acid and thyroid hormone receptor;SMAP270;T3 receptor-associating factor;Thyroid-, retinoic-acid-receptor-associated corepressor;Putative uncharacterized protein NCOR2;CTG repeat protein 26;Nuclear receptor corepressor 2;Silencing mediator of retinoic acid and thyroid hormone receptor;SMAP270;T3 receptor-associati…	CTG26;NCOR2;CTG26;NCOR2;NCOR2;CTG26;NCOR2;NCOR2;CTG26;NCOR2;NCOR2	Isoform 1 of Nuclear receptor corepressor 2;Isoform 3 of Nuclear receptor corepressor 2;Uncharacterized protein;Isoform 4 of Nuclear receptor corepressor 2;Uncharacterized protein;Isoform 5 of Nuclear receptor corepressor 2;Uncharacterized protein;29 kDa p	Q9Y618-1;Q9Y618;C9JQE8;Q9Y618-3;C9J0Q5;Q9Y618-4;C9J7T7;Q9BT61;Q9Y618-5;C9J239;C9JE98;C9J330	0.821107	6.46194	0.81672	6.46194	0.000942083	104.33	0.821107	6.46194	0.000941968	104.3						2	S	EPVSPPSPPHTDP	CK1;ERK/MAPK;Proline-directed;WW GroupIV	0.0023175	0.000942083	104.33	_LEPVpSPPpSPPHTDPELELVPPR_	LEPVS(0.971)PPS(0.821)PPHT(0.208)DPELELVPPR	LEPVS(14.36)PPS(6.46)PPHT(-6.46)DPELELVPPR	8	3	855.068
42	23	215	215	Phosphoserine	1059	1319	3396	6234	TSenrich-100ughela-2	17212	3395	6233	TSenrich-100ughela-1	15963	IPI00001735;IPI00923596;IPI00952937;IPI00923436;IPI00952657;IPI00923531;IPI00878709;IPI00879943	IPI00001735	IPI00001735	CTG repeat protein 26;Nuclear receptor corepressor 2;Silencing mediator of retinoic acid and thyroid hormone receptor;SMAP270;T3 receptor-associating factor;Thyroid-, retinoic-acid-receptor-associated corepressor;Putative uncharacterized protein NCOR2;CTG repeat protein 26;Nuclear receptor corepressor 2;Silencing mediator of retinoic acid and thyroid hormone receptor;SMAP270;T3 receptor-associati…	CTG26;NCOR2;CTG26;NCOR2;NCOR2;CTG26;NCOR2;NCOR2;CTG26;NCOR2;NCOR2	Isoform 1 of Nuclear receptor corepressor 2;Isoform 3 of Nuclear receptor corepressor 2;Uncharacterized protein;Isoform 4 of Nuclear receptor corepressor 2;Uncharacterized protein;Isoform 5 of Nuclear receptor corepressor 2;Uncharacterized protein;29 kDa p	Q9Y618-1;Q9Y618;C9JQE8;Q9Y618-3;C9J0Q5;Q9Y618-4;C9J7T7;Q9BT61;Q9Y618-5;C9J239;C9JE98;C9J330	0.983139	17.6573	0.786545	5.66418	0.0784547	89.793	0.983139	17.6573	0.492325	70.787	0.890291	9.09291	0.524722	69.286		1	S	EPEKPVSPPPIES	ERK/MAPK;Proline-directed;WW GroupIV	0.0023175	0.0784547	89.793	_QQQLEEEAAKPPEPEKPVpSPPPIESK_	QQQLEEEAAKPPEPEKPVS(0.983)PPPIES(0.017)K	QQQLEEEAAKPPEPEKPVS(17.66)PPPIES(-17.66)K	19	4	741.367
43	23	2057	2057	Phosphoserine	1269	1579;1580	4058	7379	TSenrich-100ughela-2	18054	4054	7375	TSenrich-100ughela-3	19665	IPI00001735;IPI00923596;IPI00952937;IPI00923436;IPI00952657;IPI00923531;IPI00939494;IPI00878336;IPI00952895	IPI00001735	IPI00001735	CTG repeat protein 26;Nuclear receptor corepressor 2;Silencing mediator of retinoic acid and thyroid hormone receptor;SMAP270;T3 receptor-associating factor;Thyroid-, retinoic-acid-receptor-associated corepressor;Putative uncharacterized protein NCOR2;CTG repeat protein 26;Nuclear receptor corepressor 2;Silencing mediator of retinoic acid and thyroid hormone receptor;SMAP270;T3 receptor-associati…	CTG26;NCOR2;CTG26;NCOR2;NCOR2;CTG26;NCOR2;NCOR2;CTG26;NCOR2;CTG26;NCOR2;NCOR2	Isoform 1 of Nuclear receptor corepressor 2;Isoform 3 of Nuclear receptor corepressor 2;Uncharacterized protein;Isoform 4 of Nuclear receptor corepressor 2;Uncharacterized protein;Isoform 5 of Nuclear receptor corepressor 2;204 kDa protein;Isoform 2 of Nuc	Q9Y618-1;Q9Y618;C9JQE8;Q9Y618-3;C9J0Q5;Q9Y618-4;C9J7T7;Q9BT61;Q9Y618-5;C9J239;C9JE98;Q9Y618-2;C9JJF6	0.421749	1.09949	0.338993	1.44934	2.34493e-09	134.43	0.421749	1.09949	7.79144e-15	149	0.513386	1.46548	6.20278e-15	151.44		3	S	YHGSSYSPEGVEP	CK1;Proline-directed	0.05	6.20278e-15	151.44	_SLGYHGSSYpSPEGVEPVpSPVpSSPSLTHDK_	S(0.018)LGY(0.013)HGS(0.106)S(0.329)Y(0.112)S(0.422)PEGVEPVS(0.653)PVS(0.601)S(0.572)PS(0.16)LT(0.013)HDK	S(-13.37)LGY(-13.89)HGS(-6.08)S(-1.1)Y(-4.59)S(1.1)PEGVEPVS(0.55)PVS(0.55)S(-0.55)PS(-7.46)LT(-19.54)HDK	10	3	1080.78
44	23	2065	2065	Phosphoserine	1269	1579;1580	4058	7379	TSenrich-100ughela-2	18054	4054	7375	TSenrich-100ughela-3	19665	IPI00001735;IPI00923596;IPI00952937;IPI00923436;IPI00952657;IPI00923531;IPI00939494;IPI00878336;IPI00952895	IPI00001735	IPI00001735	CTG repeat protein 26;Nuclear receptor corepressor 2;Silencing mediator of retinoic acid and thyroid hormone receptor;SMAP270;T3 receptor-associating factor;Thyroid-, retinoic-acid-receptor-associated corepressor;Putative uncharacterized protein NCOR2;CTG repeat protein 26;Nuclear receptor corepressor 2;Silencing mediator of retinoic acid and thyroid hormone receptor;SMAP270;T3 receptor-associati…	CTG26;NCOR2;CTG26;NCOR2;NCOR2;CTG26;NCOR2;NCOR2;CTG26;NCOR2;CTG26;NCOR2;NCOR2	Isoform 1 of Nuclear receptor corepressor 2;Isoform 3 of Nuclear receptor corepressor 2;Uncharacterized protein;Isoform 4 of Nuclear receptor corepressor 2;Uncharacterized protein;Isoform 5 of Nuclear receptor corepressor 2;204 kDa protein;Isoform 2 of Nuc	Q9Y618-1;Q9Y618;C9JQE8;Q9Y618-3;C9J0Q5;Q9Y618-4;C9J7T7;Q9BT61;Q9Y618-5;C9J239;C9JE98;Q9Y618-2;C9JJF6	0.653417	0.552215	0.146223	-5.73566	2.34493e-09	134.43	0.653417	0.552215	7.79144e-15	149	0.998437	29.4561	6.20278e-15	151.44		3	S	EGVEPVSPVSSPS	ERK/MAPK;GSK3;Proline-directed;WW GroupIV	0.0023175	6.20278e-15	151.44	_SLGYHGSSYpSPEGVEPVpSPVpSSPSLTHDK_	S(0.018)LGY(0.013)HGS(0.106)S(0.329)Y(0.112)S(0.422)PEGVEPVS(0.653)PVS(0.601)S(0.572)PS(0.16)LT(0.013)HDK	S(-13.37)LGY(-13.89)HGS(-6.08)S(-1.1)Y(-4.59)S(1.1)PEGVEPVS(0.55)PVS(0.55)S(-0.55)PS(-7.46)LT(-19.54)HDK	18	3	1080.78
45	23	2068	2068	Phosphoserine	1269	1579;1580	4058	7379	TSenrich-100ughela-2	18054	4054	7375	TSenrich-100ughela-3	19665	IPI00001735;IPI00923596;IPI00952937;IPI00923436;IPI00952657;IPI00923531;IPI00939494;IPI00878336;IPI00952895	IPI00001735	IPI00001735	CTG repeat protein 26;Nuclear receptor corepressor 2;Silencing mediator of retinoic acid and thyroid hormone receptor;SMAP270;T3 receptor-associating factor;Thyroid-, retinoic-acid-receptor-associated corepressor;Putative uncharacterized protein NCOR2;CTG repeat protein 26;Nuclear receptor corepressor 2;Silencing mediator of retinoic acid and thyroid hormone receptor;SMAP270;T3 receptor-associati…	CTG26;NCOR2;CTG26;NCOR2;NCOR2;CTG26;NCOR2;NCOR2;CTG26;NCOR2;CTG26;NCOR2;NCOR2	Isoform 1 of Nuclear receptor corepressor 2;Isoform 3 of Nuclear receptor corepressor 2;Uncharacterized protein;Isoform 4 of Nuclear receptor corepressor 2;Uncharacterized protein;Isoform 5 of Nuclear receptor corepressor 2;204 kDa protein;Isoform 2 of Nuc	Q9Y618-1;Q9Y618;C9JQE8;Q9Y618-3;C9J0Q5;Q9Y618-4;C9J7T7;Q9BT61;Q9Y618-5;C9J239;C9JE98;Q9Y618-2;C9JJF6	0.601187	0.552215	0.625071	0.727947	2.34493e-09	134.43	0.601187	0.552215	7.79144e-15	149	0.00122615	-29.4561	6.20278e-15	151.44		3	S	EPVSPVSSPSLTH	CK1	0.081	6.20278e-15	151.44	_SLGYHGSSYpSPEGVEPVpSPVpSSPSLTHDK_	S(0.018)LGY(0.013)HGS(0.106)S(0.329)Y(0.112)S(0.422)PEGVEPVS(0.653)PVS(0.601)S(0.572)PS(0.16)LT(0.013)HDK	S(-13.37)LGY(-13.89)HGS(-6.08)S(-1.1)Y(-4.59)S(1.1)PEGVEPVS(0.55)PVS(0.55)S(-0.55)PS(-7.46)LT(-19.54)HDK	21	3	1080.78
46	24	35	35	Phosphoserine	976	1227	3197	5928	TSenrich-100ughela-2	18149	3195	5926	TSenrich-100ughela-3	18342	IPI00001738	IPI00001738	IPI00001738	88 kDa nucleoporin;Nuclear pore complex protein Nup88;Nucleoporin Nup88;cDNA FLJ58372, highly similar to Nuclear pore complex protein Nup88;cDNA FLJ56516, highly similar to Nuclear pore complex protein Nup88	NUP88	Nuclear pore complex protein Nup88	Q99567;B4DP20;B7Z5I6	0.955198	13.6666	0.498076	0	0.00305564	111.31	0.955198	13.6666	6.21589e-06	120.28	0.950185	12.8075	5.23191e-06	122.26		1	S	EGLKNQSPTEAEK	CK2;Proline-directed	0.05	5.23191e-06	122.26	_NQpSPTEAEKPASSSLPSSPPPQLLTR_	NQS(0.955)PT(0.041)EAEKPAS(0.002)SS(0.002)LPSSPPPQLLTR	NQS(13.67)PT(-13.67)EAEKPAS(-26.8)S(-40.08)S(-27.62)LPS(-70.2)S(-83.96)PPPQLLT(-103.44)R	3	3	933.79
47	25	250	250		551	712	1780	3019	TSenrich-100ughela-2	16805	1779	3018	TSenrich-100ughela-1	15343	IPI00002135;IPI00908659	IPI00002135	IPI00002135	ERIC-1;Transforming acidic coiled-coil-containing protein 3;Transforming, acidic coiled-coil containing protein 3;cDNA FLJ60965, highly similar to Transforming acidic coiled-coil-containing protein 3;cDNA FLJ60398, highly similar to Transforming acidic coiled-coil-containing protein 3	ERIC1;TACC3	Transforming acidic coiled-coil-containing protein 3;cDNA FLJ60965, highly similar to Transforming acidic coiled-coil-containing protein 3	Q9Y6A5;Q2NKK4;B4DYJ1;B4E355	0.5	0	0.909103	10.0006	0.0108097	93.721	0.5	0	0.138043	75.077						1	S	PAAVATSPPGAIP	Proline-directed	0.05	0.0108097	93.721	_HGGVCAPAAVApTSPPGAIPK_	HGGVCAPAAVAT(0.5)S(0.5)PPGAIPK	HGGVCAPAAVAT(0)S(0)PPGAIPK	13	3	646.648
48	26	227	227	Phosphoserine	320	421;422	1049	1811	TSenrich-100ughela-1	17434	1047	1809	TSenrich-100ughela-2	16029	IPI00002186	IPI00002186	IPI00002186	Brefeldin A-inhibited guanine nucleotide-exchange protein 2;cDNA FLJ12561 fis, clone NT2RM4000798, highly similar to Brefeldin A-inhibited guanine nucleotide-exchange protein 2;cDNA FLJ55398, highly similar to Brefeldin A-inhibited guaninenucleotide-exchange protein 2;ADP-ribosylation factor guanine nucleotide-exchange factor 2 variant;ARFGEF2 protein	ARFGEF2;ARFGEP2;BIG2	Brefeldin A-inhibited guanine nucleotide-exchange protein 2	Q9Y6D5;B3KMT7;B4DYN7;Q59FR3;Q86TH5	0.999998	57.0783	0.999998	57.0783	0.00065628	108.64	0.999997	54.5977	2.68279e-12	153.7	1	120.102	3.54392e-06	124.62		1	S	IQAAAVSPKFVRL	CDK1;Proline-directed	0.0057	2.68279e-12	153.7	_ELEKPIQSKPQSPVIQAAAVpSPK_	ELEKPIQSKPQSPVIQAAAVS(1)PK	ELEKPIQS(-88.79)KPQS(-57.08)PVIQAAAVS(57.08)PK	21	3	842.451
49	26	1528	1528	Phosphoserine	493	639	1601	2725	TSenrich-100ughela-3	15277	1601	2725	TSenrich-100ughela-3	15277	IPI00002186	IPI00002186	IPI00002186	Brefeldin A-inhibited guanine nucleotide-exchange protein 2;cDNA FLJ12561 fis, clone NT2RM4000798, highly similar to Brefeldin A-inhibited guanine nucleotide-exchange protein 2;cDNA FLJ55398, highly similar to Brefeldin A-inhibited guaninenucleotide-exchange protein 2;ADP-ribosylation factor guanine nucleotide-exchange factor 2 variant;ARFGEF2 protein	ARFGEF2;ARFGEP2;BIG2	Brefeldin A-inhibited guanine nucleotide-exchange protein 2	Q9Y6D5;B3KMT7;B4DYN7;Q59FR3;Q86TH5	0.999271	31.9284									0.999271	31.9284	1.16626e-06	135.58		1	S	RGQSQLSNPTDDS	CK1	0.081	1.16626e-06	135.58	_GQSQLpSNPTDDSWK_	GQS(0.001)QLS(0.999)NPTDDSWK	GQS(-31.93)QLS(31.93)NPT(-40.61)DDS(-61.33)WK	6	2	821.841
50	27	62	62	Phosphoserine	1000	1253	3243	5992	TSenrich-100ughela-2	17059	3243	5992	TSenrich-100ughela-2	17059	IPI00002214;IPI00789457	IPI00002214	IPI00002214	Importin subunit alpha-2;Karyopherin subunit alpha-2;RAG cohort protein 1;SRP1-alpha;cDNA FLJ78270, highly similar to Homo sapiens karyopherin alpha 2 (RAG cohort 1, importin alpha 1)(KPNA2), mRNA;Karyopherin alpha 2 (RAG cohort 1, importin alpha 1);Karyopherin alpha 2 (RAG cohort 1, importin alpha 1)	KPNA2;RCH1;SRP1;KPNA2	Importin subunit alpha-2;Karyopherin alpha 2	P52292;A8K7D9;Q53YE3;Q6NVW7;Q7Z726	0.845179	7.37119					0.845179	7.37119	3.21291e-16	164.81						1	S	FPDDATSPLQENR	Proline-directed	0.05	3.21291e-16	164.81	_NVSSFPDDATpSPLQENR_	NVSSFPDDAT(0.155)S(0.845)PLQENR	NVS(-109.13)S(-90.28)FPDDAT(-7.37)S(7.37)PLQENR	11	2	978.92
51	28	421	421		1229	1528	3939	7164	TSenrich-100ughela-2	23894	3938	7162	TSenrich-100ughela-2	23891	IPI00002335	IPI00002335	IPI00002335	Huntingtin;Huntington disease protein;cDNA FLJ76709, highly similar to Homo sapiens Huntington disease-associated protein (HD) mRNA;Huntingtin (Huntington disease), isoform CRA_a;Huntingtin variant	HD;HTT;IT15;hCG_1984846	huntingtin	P42858;A8K3C9;D2CTD2;D2CTD4;D2CTD7;D2CTD8;D2CTD9;D2CTE1;D2CTE3;D2CTE5;D2CTE6;D2CTE7;D2CTE8;D2CTE9;D2CTF0;D2CTF1;D2CTF2;D3DVR8;Q59FF4	0.916898	10.4507	0.623842	2.21047	5.38128e-44	213.66	0.916898	10.4507	1.11863e-87	255.77	0.923938	10.8829	2.19388e-16	163.11		2	S	GRSRSGSIVELIA	CAMK2;CK1;CK2;PKA/AKT	0.001764	1.11863e-87	255.77	_SGpSIVELIAGGGSSCpSPVLSR_	S(0.083)GS(0.917)IVELIAGGGS(0.009)S(0.041)CS(0.95)PVLS(0.001)R	S(-10.45)GS(10.45)IVELIAGGGS(-20.46)S(-13.73)CS(13.73)PVLS(-32.36)R	3	3	731.66
52	28	434	434		1229	1528	3939	7164	TSenrich-100ughela-2	23894	3938	7162	TSenrich-100ughela-2	23891	IPI00002335	IPI00002335	IPI00002335	Huntingtin;Huntington disease protein;cDNA FLJ76709, highly similar to Homo sapiens Huntington disease-associated protein (HD) mRNA;Huntingtin (Huntington disease), isoform CRA_a;Huntingtin variant	HD;HTT;IT15;hCG_1984846	huntingtin	P42858;A8K3C9;D2CTD2;D2CTD4;D2CTD7;D2CTD8;D2CTD9;D2CTE1;D2CTE3;D2CTE5;D2CTE6;D2CTE7;D2CTE8;D2CTE9;D2CTF0;D2CTF1;D2CTF2;D3DVR8;Q59FF4	0.950199	13.7309	0.914804	10.457	5.38128e-44	213.66	0.950199	13.7309	1.11863e-87	255.77	0.773555	6.31153	2.19388e-16	163.11		2	S	GGGSSCSPVLSRK	CK1;GSK3;Proline-directed	0.05	1.11863e-87	255.77	_SGpSIVELIAGGGSSCpSPVLSR_	S(0.083)GS(0.917)IVELIAGGGS(0.009)S(0.041)CS(0.95)PVLS(0.001)R	S(-10.45)GS(10.45)IVELIAGGGS(-20.46)S(-13.73)CS(13.73)PVLS(-32.36)R	16	3	731.66
53	29	629	629	Phosphoserine	259	344	861	1535	TSenrich-100ughela-1	21860	861	1535	TSenrich-100ughela-1	21860	IPI00002349	IPI00002349	IPI00002349	82 kDa FMRP-interacting protein;Cell proliferation-inducing gene 1 protein;FMRP-interacting protein 2;Nuclear fragile X mental retardation-interacting protein 2;cDNA FLJ75095, highly similar to Homo sapiens 82-kD FMRP Interacting Protein (182-FIP), mRNA;Nuclear fragile X mental retardation protein interacting protein 2;Nuclear fragile X mental retardation protein interacting protein 2, isoform CR…	KIAA1321;NUFIP2;PIG1;hCG_29087	Nuclear fragile X mental retardation-interacting protein 2	Q7Z417;A1L3A7	0.500158	0.9907	0.500158	0.9907	1.70474e-05	118.46										1	S	SQNPLASPTNTLL	Proline-directed	0.05	1.70474e-05	118.46	_DYEIESQNPLApSPTNTLLGSAK_	DYEIESQNPLAS(0.5)PT(0.101)NT(0.398)LLGSAK	DY(-79.53)EIES(-39.93)QNPLAS(0.99)PT(-6.93)NT(-0.99)LLGS(-34.53)AK	12	3	810.048
54	29	572	572	Phosphoserine	1158	1439	3738	6861	TSenrich-100ughela-1	19348	3738	6861	TSenrich-100ughela-1	19348	IPI00002349	IPI00002349	IPI00002349	82 kDa FMRP-interacting protein;Cell proliferation-inducing gene 1 protein;FMRP-interacting protein 2;Nuclear fragile X mental retardation-interacting protein 2;cDNA FLJ75095, highly similar to Homo sapiens 82-kD FMRP Interacting Protein (182-FIP), mRNA;Nuclear fragile X mental retardation protein interacting protein 2;Nuclear fragile X mental retardation protein interacting protein 2, isoform CR…	KIAA1321;NUFIP2;PIG1;hCG_29087	Nuclear fragile X mental retardation-interacting protein 2	Q7Z417;A1L3A7	0.949697	12.879	0.949697	12.879	0.084124	75.522										1	S	ELEKRTSPQVLGS	CHK1;PKA;PKD;Proline-directed	0.020748	0.084124	75.522	_RTpSPQVLGSILK_	RT(0.049)S(0.95)PQVLGS(0.001)ILK	RT(-12.88)S(12.88)PQVLGS(-28.44)ILK	3	2	689.876
55	30	440	440		1409	1776	4572	8133	TSenrich-100ughela-2	14729	4570	8129	TSenrich-100ughela-1	13654	IPI00641770;IPI00939510;IPI00002591;IPI00165547;IPI00973824	IPI00641770	IPI00641770	NPIK;Phosphatidylinositol 4-kinase beta;PI4K92;NPIK;Phosphatidylinositol 4-kinase beta;PI4K92;NPIK;Phosphatidylinositol 4-kinase beta;PI4K92	PI4KB;PIK4CB;PI4KB;PIK4CB;PI4KB;PIK4CB	phosphatidylinositol 4-kinase beta;93 kDa protein;Isoform 1 of Phosphatidylinositol 4-kinase beta;Isoform 2 of Phosphatidylinositol 4-kinase beta;21 kDa protein	Q9UBF8-3;Q9UBF8;Q9UBF8-1;Q9UBF8-2	0.999965	44.5766	1	142.085	5.7418e-114	193.25	0.999965	44.5766	6.66824e-11	156.84						1	S	RIRSTRSVENLPE	CK1	0.081	5.7418e-114	193.25	_pSVENLPECGITHEQR_	S(1)VENLPECGITHEQR	S(44.58)VENLPECGIT(-44.58)HEQR	1	3	616.936
56	32	12	12		1686	2127	5424	9592	TSenrich-100ughela-1	18937	5424	9592	TSenrich-100ughela-1	18937	IPI00003353;IPI00964004;IPI00968248;IPI00967968;IPI00966658	IPI00003353	IPI00003353	Neuronal protein 3.1;Protein p311	C5orf13;P311	Neuronal protein 3.1;Uncharacterized protein;Uncharacterized protein;Uncharacterized protein;Uncharacterized protein	Q16612;D6RIC9;D6REJ5;D6R982;D6R9Y7	1	84.9435	1	84.9435	0.0421554	84.943										3	S	ELFVWVSQEPFPN			0.0421554	84.943	_VpYpYPELFVWVpSQEPFPNK_	VY(1)Y(1)PELFVWVS(1)QEPFPNK	VY(84.94)Y(84.94)PELFVWVS(84.94)QEPFPNK	11	3	828.012
57	34	28	28	Phosphoserine	529;1103	684;685;1371;1372;1373	3559	6551	TSenrich-100ughela-1	21627	1721	2914	TSenrich-100ughela-2	24453	IPI00003394;IPI00966114;IPI00009597;IPI00219360;IPI00009598	IPI00003394	IPI00003394	Component of gems 1;Gemin-1;Survival motor neuron protein;Component of gems 1;Gemin-1;Survival motor neuron protein;Component of gems 1;Gemin-1;Survival motor neuron protein;Component of gems 1;Gemin-1;Survival motor neuron protein;cDNA FLJ60754, moderately similar to Survival motor neuron protein;Survival of motor neuron	SMN;SMN1;SMN2;SMNC;SMNT;SMN;SMN1;SMN2;SMNC;SMNT;SMN;SMN1;SMN2;SMNC;SMNT;SMN;SMN1;SMN2;SMNC;SMNT	Isoform SMN of Survival motor neuron protein;32 kDa protein;Isoform SMN-delta7 of Survival motor neuron protein;Isoform SMN-delta5 of Survival motor neuron protein;Isoform SMN-delta57 of Survival motor neuron protein	Q16637-1;Q16637;Q16637-3;Q16637-2;Q16637-4;B4DP61;Q9UNT8	0.818626	6.54517	0.818626	6.54517	2.97935e-90	248.19	1	149.435	1.50205e-234	330.1	0.5604	3.20176	6.40772e-179	307.93		1	S	RRGTGQSDDSDIW			1.50205e-234	330.1	_RGTGQpSDDSDIWDDTALIK_	RGT(0.181)GQS(0.819)DDSDIWDDTALIK	RGT(-6.55)GQS(6.55)DDS(-53.98)DIWDDT(-129.73)ALIK	6	2	1086.98
58	36	15	15	Phosphoserine	1140;1174	1418;1419;1458;1459	3785	6942	TSenrich-100ughela-2	20665	3783	6940	TSenrich-100ughela-1	19210	IPI00003419	IPI00003419	IPI00003419	Small acidic protein	C11orf58;SMAP	Small acidic protein	O00193	1	97.1081	1	99.8571	1.09546e-195	327.11	1	97.1081	8.03057e-33	191.83	1	98.4832	2.45606e-169	302.53		2	S	PHGVKRSASPDDD			1.09546e-195	327.11	_pSApSPDDDLGSSNWEAADLGNEER_	S(1)AS(1)PDDDLGSSNWEAADLGNEER	S(97.11)AS(98.16)PDDDLGS(-97.11)S(-101.2)NWEAADLGNEER	1	2	1297.98
59	36	17	17	Phosphoserine	1140;1174	1418;1419;1458;1459	3785	6942	TSenrich-100ughela-2	20665	3783	6940	TSenrich-100ughela-1	19210	IPI00003419	IPI00003419	IPI00003419	Small acidic protein	C11orf58;SMAP	Small acidic protein	O00193	1	98.1589	1	90.3507	1.09546e-195	327.11	1	98.1589	8.03057e-33	191.83	1	93.0352	2.45606e-169	302.53		2	S	GVKRSASPDDDLG	CAMK2;CHK1;CK2;PKA;PKD;Proline-directed	0.003024	1.09546e-195	327.11	_pSApSPDDDLGSSNWEAADLGNEER_	S(1)AS(1)PDDDLGSSNWEAADLGNEER	S(97.11)AS(98.16)PDDDLGS(-97.11)S(-101.2)NWEAADLGNEER	3	2	1297.98
60	37	86	86		839	1061	2815	5286	TSenrich-100ughela-2	12192	2813	5283	TSenrich-100ughela-1	12835	IPI00003704;IPI00974578;IPI00556034;IPI00908491;IPI00965408;IPI00940890	IPI00003704	IPI00003704	Lark homolog;RNA-binding motif protein 4;RNA-binding motif protein 4a;RNA-binding protein 4;cDNA FLJ78260, highly similar to Homo sapiens RNA binding motif protein 4, mRNA;Lark homolog;RNA-binding motif protein 4;RNA-binding motif protein 4a;RNA-binding protein 4;cDNA FLJ59148, highly similar to RNA-binding protein 4;Lark homolog;RNA-binding motif protein 4;RNA-binding motif protein 4a;RNA-bindin…	RBM4;RBM4A;RBM4;RBM4A;RBM4;RBM4A	Isoform 1 of RNA-binding protein 4;26 kDa protein;Isoform 2 of RNA-binding protein 4;cDNA FLJ59148, highly similar to RNA-binding protein 4;Uncharacterized protein;Isoform 3 of RNA-binding protein 4	Q9BWF3-1;Q9BWF3;A8K9U0;Q9BWF3-2;B4E1U0;D6R9K7;Q9BWF3-3	0.496421	0	0.860661	10.9179	5.69491e-51	207.75	0.496421	0	0.0314758	93.231	0.577828	1.40487	0.00644157	98.709		1	S	LHVGNISPTCTNK	Proline-directed	0.05	5.69491e-51	207.75	_LHVGNIpSPTCTNK_	LHVGNIS(0.496)PT(0.496)CT(0.007)NK	LHVGNIS(0)PT(0)CT(-18.41)NK	7	2	760.85
61	38	1347	1347	Phosphoserine	204	267	668	1181	TSenrich-100ughela-2	18521	667	1179	TSenrich-100ughela-1	17040	IPI00003842;IPI00472094	IPI00003842	IPI00003842	Microtubule-associated protein 2;MAP2 protein;Microtubule-associated protein 2	MAP2;MAP2	Isoform 1 of Microtubule-associated protein 2;Isoform 3 of Microtubule-associated protein 2	P11137-1;P11137;Q6NYC5;P11137-3	1	79.5023	1	88.0233	0.0163617	90.533	1	79.5023	0.0804341	82.129	0.999998	59.9633	0.50169	59.963		2	S	AEPKDGSPEAPAS	Proline-directed	0.05	0.0163617	90.533	_DGpSPEAPApSPEREEVALSEYK_	DGS(1)PEAPAS(0.991)PEREEVALS(0.002)EY(0.007)K	DGS(79.5)PEAPAS(21.66)PEREEVALS(-27.55)EY(-21.66)K	3	3	807.668
62	38	1353	1353	Phosphoserine	204	267	668	1181	TSenrich-100ughela-2	18521	667	1179	TSenrich-100ughela-1	17040	IPI00003842;IPI00472094	IPI00003842	IPI00003842	Microtubule-associated protein 2;MAP2 protein;Microtubule-associated protein 2	MAP2;MAP2	Isoform 1 of Microtubule-associated protein 2;Isoform 3 of Microtubule-associated protein 2	P11137-1;P11137;Q6NYC5;P11137-3	0.99149	21.6598	0.999938	43.2971	0.0163617	90.533	0.99149	21.6598	0.0804341	82.129	0.273007	-3.36955	0.50169	59.963		2	S	SPEAPASPEREEV	CDK1;CDK2;ERK/MAPK;Proline-directed;WW GroupIV	0.0023175	0.0163617	90.533	_DGpSPEAPApSPEREEVALSEYK_	DGS(1)PEAPAS(0.991)PEREEVALS(0.002)EY(0.007)K	DGS(79.5)PEAPAS(21.66)PEREEVALS(-27.55)EY(-21.66)K	9	3	807.668
63	38	1782	1782	Phosphoserine	1582	1996	5097	9035	TSenrich-100ughela-3	14416	5097	9035	TSenrich-100ughela-3	14416	IPI00003842;IPI00472094;IPI00735732;IPI00216900;IPI00293579	IPI00003842	IPI00003842	Microtubule-associated protein 2;MAP2 protein;Microtubule-associated protein 2;Microtubule-associated protein;Microtubule-associated protein;Microtubule-associated protein 2;Microtubule-associated protein	MAP2;MAP2;MAP2;4R-MAP2;MAP2	Isoform 1 of Microtubule-associated protein 2;Isoform 3 of Microtubule-associated protein 2;microtubule-associated protein 2 isoform 5;microtubule-associated protein 2 isoform 4;Isoform 2 of Microtubule-associated protein 2	P11137-1;P11137;Q6NYC5;P11137-3;Q8IUX2;Q16296;P11137-2;A8K5Y1;Q59FX9	0.809186	6.27185									0.809186	6.27185	0.00874179	96.625		3	S	AEIITQSPGRSSV	CDK1;CDK2;GSK3;Proline-directed	0.0057	0.00874179	96.625	_VDHGAEIITQpSPGRpSSVApSPR_	VDHGAEIIT(0.191)QS(0.809)PGRS(0.501)S(0.501)VAS(0.997)PR	VDHGAEIIT(-6.27)QS(6.27)PGRS(0)S(0)VAS(22.79)PR	11	3	802.008
64	38	1786	1786		1582	1996	5097	9035	TSenrich-100ughela-3	14416	5097	9035	TSenrich-100ughela-3	14416	IPI00003842;IPI00472094;IPI00735732;IPI00216900;IPI00293579	IPI00003842	IPI00003842	Microtubule-associated protein 2;MAP2 protein;Microtubule-associated protein 2;Microtubule-associated protein;Microtubule-associated protein;Microtubule-associated protein 2;Microtubule-associated protein	MAP2;MAP2;MAP2;4R-MAP2;MAP2	Isoform 1 of Microtubule-associated protein 2;Isoform 3 of Microtubule-associated protein 2;microtubule-associated protein 2 isoform 5;microtubule-associated protein 2 isoform 4;Isoform 2 of Microtubule-associated protein 2	P11137-1;P11137;Q6NYC5;P11137-3;Q8IUX2;Q16296;P11137-2;A8K5Y1;Q59FX9	0.501255	0									0.501255	0	0.00874179	96.625		3	S	TQSPGRSSVASPR	CK1;GSK3	0.081	0.00874179	96.625	_VDHGAEIITQpSPGRpSSVApSPR_	VDHGAEIIT(0.191)QS(0.809)PGRS(0.501)S(0.501)VAS(0.997)PR	VDHGAEIIT(-6.27)QS(6.27)PGRS(0)S(0)VAS(22.79)PR	15	3	802.008
65	38	1787	1787		1582	1996	5097	9035	TSenrich-100ughela-3	14416	5097	9035	TSenrich-100ughela-3	14416	IPI00003842;IPI00472094;IPI00735732;IPI00216900;IPI00293579	IPI00003842	IPI00003842	Microtubule-associated protein 2;MAP2 protein;Microtubule-associated protein 2;Microtubule-associated protein;Microtubule-associated protein;Microtubule-associated protein 2;Microtubule-associated protein	MAP2;MAP2;MAP2;4R-MAP2;MAP2	Isoform 1 of Microtubule-associated protein 2;Isoform 3 of Microtubule-associated protein 2;microtubule-associated protein 2 isoform 5;microtubule-associated protein 2 isoform 4;Isoform 2 of Microtubule-associated protein 2	P11137-1;P11137;Q6NYC5;P11137-3;Q8IUX2;Q16296;P11137-2;A8K5Y1;Q59FX9	0.501255	0									0.501255	0	0.00874179	96.625		3	S	QSPGRSSVASPRR	AURORA;AURORA-1;PKA	0.020748	0.00874179	96.625	_VDHGAEIITQpSPGRpSSVApSPR_	VDHGAEIIT(0.191)QS(0.809)PGRS(0.501)S(0.501)VAS(0.997)PR	VDHGAEIIT(-6.27)QS(6.27)PGRS(0)S(0)VAS(22.79)PR	16	3	802.008
66	38	1790	1790	Phosphoserine	1582	1996	5097	9035	TSenrich-100ughela-3	14416	5097	9035	TSenrich-100ughela-3	14416	IPI00003842;IPI00472094;IPI00735732;IPI00216900;IPI00293579	IPI00003842	IPI00003842	Microtubule-associated protein 2;MAP2 protein;Microtubule-associated protein 2;Microtubule-associated protein;Microtubule-associated protein;Microtubule-associated protein 2;Microtubule-associated protein	MAP2;MAP2;MAP2;4R-MAP2;MAP2	Isoform 1 of Microtubule-associated protein 2;Isoform 3 of Microtubule-associated protein 2;microtubule-associated protein 2 isoform 5;microtubule-associated protein 2 isoform 4;Isoform 2 of Microtubule-associated protein 2	P11137-1;P11137;Q6NYC5;P11137-3;Q8IUX2;Q16296;P11137-2;A8K5Y1;Q59FX9	0.997492	22.7928									0.997492	22.7928	0.00874179	96.625		3	S	GRSSVASPRRLSN	CDK1;CDK2;CK1;ERK/MAPK;Proline-directed	0.0034	0.00874179	96.625	_VDHGAEIITQpSPGRpSSVApSPR_	VDHGAEIIT(0.191)QS(0.809)PGRS(0.501)S(0.501)VAS(0.997)PR	VDHGAEIIT(-6.27)QS(6.27)PGRS(0)S(0)VAS(22.79)PR	19	3	802.008
67	39	161	161		794	1007	2645	4889	TSenrich-100ughela-2	17729	2645	4889	TSenrich-100ughela-2	17729	IPI00955022;IPI00003843;IPI00216245;IPI00955040;IPI00922413;IPI00797934;IPI00216246;IPI00332453;IPI00889517	IPI00955022	IPI00955022	cDNA FLJ53324, highly similar to Tight junction protein ZO-2;Tight junction protein 2;Tight junction protein ZO-2;Zona occludens protein 2;Zonula occludens protein 2;Tight junction protein 2;Tight junction protein ZO-2;Zona occludens protein 2;Zonula occludens protein 2;cDNA FLJ54712, highly similar to Tight junction protein ZO-2;cDNA FLJ61560, highly similar to Tight junction protein ZO-2;Tight …	TJP2;X104;ZO2;TJP2;X104;ZO2;TJP2;X104;ZO2;RP11-16N10.1-006;TJP2;X104;ZO2;TJP2;X104;ZO2;RP11-16N10.1-004;RP11-16N10.1-001;TJP2	tight junction protein ZO-2 isoform 3;Isoform A1 of Tight junction protein ZO-2;Isoform C1 of Tight junction protein ZO-2;tight junction protein ZO-2 isoform 4;cDNA FLJ61560, highly similar to Tight junction protein ZO-2;Isoform A2 of Tight junction protei	B7Z2R8;Q9UDY2-1;Q9UDY2;Q9UDY2-3;B7Z7T6;B7Z954;Q9UDY2-2;A2A3H9;B7Z2R3;Q9UDY2-4;Q9UDY2-5;Q5VXL1;B1AN86	1	87.083					1	87.083	0.0348639	87.083						1	S	VAALQASPPLDQD	NEK6;Proline-directed	0.05	0.0348639	87.083	_KVQVAALQApSPPLDQDDR_	KVQVAALQAS(1)PPLDQDDR	KVQVAALQAS(87.08)PPLDQDDR	10	3	677.668
68	42	188	188	Phosphoserine	617	785	1952	3383	TSenrich-100ughela-2	13158	1951	3382	TSenrich-100ughela-1	12956	IPI00003921;IPI00218697;IPI00218700;IPI00739613;IPI00553103	IPI00003921	IPI00003921	4.1R;Band 4.1;EPB4.1;Protein 4.1;4.1R;Band 4.1;EPB4.1;Protein 4.1;EPB41 protein;Protein 4.1 variant;4.1R;Band 4.1;EPB4.1;Protein 4.1;cDNA FLJ50645;EPB41 protein;4.1R;Band 4.1;EPB4.1;Protein 4.1;Putative uncharacterized protein EPB41	E41P;EPB41;E41P;EPB41;E41P;EPB41;EPB41;E41P;EPB41	Isoform 1 of Protein 4.1;Isoform 2 of Protein 4.1;Isoform 5 of Protein 4.1;cDNA FLJ50645;protein 4.1 isoform 3	P11171-1;P11171;P11171-2;Q1WWM3;Q59F12;P11171-5;B7Z627;Q29RX4;P11171-7;C9JTS2	0.999995	53.0367	1	82.7112	0.0201536	106.63	0.999995	53.0367	0.0312113	94.775						2	S	IEVKEESPQSKAE	Proline-directed	0.05	0.0201536	106.63	_IEVKEEpSPQpSKAETELK_	IEVKEES(1)PQS(1)KAETELK	IEVKEES(53.04)PQS(36.05)KAET(-36.05)ELK	7	3	702.32
69	42	191	191	Phosphoserine	617	785	1952	3383	TSenrich-100ughela-2	13158	1951	3382	TSenrich-100ughela-1	12956	IPI00003921;IPI00218697;IPI00218700;IPI00739613;IPI00553103	IPI00003921	IPI00003921	4.1R;Band 4.1;EPB4.1;Protein 4.1;4.1R;Band 4.1;EPB4.1;Protein 4.1;EPB41 protein;Protein 4.1 variant;4.1R;Band 4.1;EPB4.1;Protein 4.1;cDNA FLJ50645;EPB41 protein;4.1R;Band 4.1;EPB4.1;Protein 4.1;Putative uncharacterized protein EPB41	E41P;EPB41;E41P;EPB41;E41P;EPB41;EPB41;E41P;EPB41	Isoform 1 of Protein 4.1;Isoform 2 of Protein 4.1;Isoform 5 of Protein 4.1;cDNA FLJ50645;protein 4.1 isoform 3	P11171-1;P11171;P11171-2;Q1WWM3;Q59F12;P11171-5;B7Z627;Q29RX4;P11171-7;C9JTS2	0.999752	36.0472	0.999876	39.077	0.0201536	106.63	0.999752	36.0472	0.0312113	94.775						2	S	KEESPQSKAETEL	CK1;CK2	0.081	0.0201536	106.63	_IEVKEEpSPQpSKAETELK_	IEVKEES(1)PQS(1)KAETELK	IEVKEES(53.04)PQS(36.05)KAET(-36.05)ELK	10	3	702.32
70	44	648	648	Phosphoserine	1220	1514	3897	7097	TSenrich-100ughela-1	12904	3897	7097	TSenrich-100ughela-1	12904	IPI00004233;IPI00413173;IPI00844453	IPI00004233	IPI00004233	Antigen KI-67;Antigen KI-67;cDNA FLJ56929, highly similar to Antigen KI-67;KI67 Antigen	MKI67;MKI67;MKI67	Isoform Long of Antigen KI-67;Isoform Short of Antigen KI-67;KI67 Antigen (Fragment)	P46013-1;P46013;P46013-2;B4DRH3;Q70L73	0.995422	23.3737	0.995422	23.3737	0.0524307	82.086										1	S	ICSKRRSGASEAN	CK1;PKA	0.042	0.0524307	82.086	_pSGASEANLIVAK_	S(0.995)GAS(0.005)EANLIVAK	S(23.37)GAS(-23.37)EANLIVAK	1	2	620.303
71	44	299	299		1225	1521;1522	3917	7131	TSenrich-100ughela-1	11974	3915	7124	TSenrich-100ughela-2	12618	IPI00004233	IPI00004233	IPI00004233	Antigen KI-67	MKI67	Isoform Long of Antigen KI-67	P46013-1;P46013	0.912543	10.1846	0.912543	10.1846	1.00537e-32	193.1	4.53063e-09	-83.4384	2.18846e-56	225.52	5.53591e-14	-132.568	9.78396e-44	212.06		2	S	RPKSGGSGHAVAE	CK1	0.081	2.18846e-56	225.52	_SGGpSGHAVAEPApSPEQELDQNK_	S(0.087)GGS(0.913)GHAVAEPAS(1)PEQELDQNK	S(-10.18)GGS(10.18)GHAVAEPAS(54.71)PEQELDQNK	4	3	789.988
72	44	308	308	Phosphoserine	1225	1521;1522	3917	7131	TSenrich-100ughela-1	11974	3915	7124	TSenrich-100ughela-2	12618	IPI00004233	IPI00004233	IPI00004233	Antigen KI-67	MKI67	Isoform Long of Antigen KI-67	P46013-1;P46013	0.999997	54.7094	0.999997	54.7094	1.00537e-32	193.1	1	83.4384	2.18846e-56	225.52	1	132.568	9.78396e-44	212.06		2	S	AVAEPASPEQELD	ERK/MAPK;Proline-directed;WW GroupIV	0.0023175	2.18846e-56	225.52	_SGGpSGHAVAEPApSPEQELDQNK_	S(0.087)GGS(0.913)GHAVAEPAS(1)PEQELDQNK	S(-10.18)GGS(10.18)GHAVAEPAS(54.71)PEQELDQNK	13	3	789.988
73	45	178	178	Phosphoserine	1379	1733	4455	7941	TSenrich-100ughela-3	9133	4455	7941	TSenrich-100ughela-3	9133	IPI00004344;IPI00383219;IPI00658213	IPI00004344	IPI00004344	AF4/FMR2 family member 4;ALL1-fused gene from chromosome 5q31 protein;Major CDK9 elongation factor-associated protein;AF4/FMR2 family member 4;ALL1-fused gene from chromosome 5q31 protein;Major CDK9 elongation factor-associated protein;AFF4 protein;AF4/FMR2 family member 4;ALL1-fused gene from chromosome 5q31 protein;Major CDK9 elongation factor-associated protein	AF5Q31;AFF4;HSPC092;MCEF;AF5Q31;AFF4;HSPC092;MCEF;AF5Q31;AFF4;HSPC092;MCEF	Isoform 1 of AF4/FMR2 family member 4;Isoform 2 of AF4/FMR2 family member 4;Isoform 3 of AF4/FMR2 family member 4	Q9UHB7-1;Q9UHB7;Q9UHB7-2;Q8TAX5;Q9UHB7-3	0.481862	0									0.481862	0	0.0546349	81.817		1	S	EHSKSRSSSPGKP	CK1	0.143	0.0546349	81.817	_pSSSPGKPQAVSSLNSSHSR_	S(0.482)S(0.482)S(0.036)PGKPQAVSSLNSSHSR	S(0)S(0)S(-11.23)PGKPQAVS(-72.05)S(-76.44)LNS(-81.82)S(-81.82)HS(-81.82)R	1	3	664.976
74	45	179	179		1379	1733	4455	7941	TSenrich-100ughela-3	9133	4455	7941	TSenrich-100ughela-3	9133	IPI00004344;IPI00383219;IPI00658213	IPI00004344	IPI00004344	AF4/FMR2 family member 4;ALL1-fused gene from chromosome 5q31 protein;Major CDK9 elongation factor-associated protein;AF4/FMR2 family member 4;ALL1-fused gene from chromosome 5q31 protein;Major CDK9 elongation factor-associated protein;AFF4 protein;AF4/FMR2 family member 4;ALL1-fused gene from chromosome 5q31 protein;Major CDK9 elongation factor-associated protein	AF5Q31;AFF4;HSPC092;MCEF;AF5Q31;AFF4;HSPC092;MCEF;AF5Q31;AFF4;HSPC092;MCEF	Isoform 1 of AF4/FMR2 family member 4;Isoform 2 of AF4/FMR2 family member 4;Isoform 3 of AF4/FMR2 family member 4	Q9UHB7-1;Q9UHB7;Q9UHB7-2;Q8TAX5;Q9UHB7-3	0.481862	0									0.481862	0	0.0546349	81.817		1	S	HSKSRSSSPGKPQ	CK1;PKA	0.042	0.0546349	81.817	_pSSSPGKPQAVSSLNSSHSR_	S(0.482)S(0.482)S(0.036)PGKPQAVSSLNSSHSR	S(0)S(0)S(-11.23)PGKPQAVS(-72.05)S(-76.44)LNS(-81.82)S(-81.82)HS(-81.82)R	2	3	664.976
75	45	487	487	Phosphoserine	1634	2063	5257	9299	TSenrich-100ughela-2	17998	5256	9297	TSenrich-100ughela-1	16935	IPI00004344;IPI00383219	IPI00004344	IPI00004344	AF4/FMR2 family member 4;ALL1-fused gene from chromosome 5q31 protein;Major CDK9 elongation factor-associated protein;AF4/FMR2 family member 4;ALL1-fused gene from chromosome 5q31 protein;Major CDK9 elongation factor-associated protein;AFF4 protein	AF5Q31;AFF4;HSPC092;MCEF;AF5Q31;AFF4;HSPC092;MCEF	Isoform 1 of AF4/FMR2 family member 4;Isoform 2 of AF4/FMR2 family member 4	Q9UHB7-1;Q9UHB7;Q9UHB7-2;Q8TAX5	0.789101	6.61894	0.937258	13.9192	0.0626406	87.842	0.789101	6.61894	0.113391	83.852						1	S	VNPHKVSPASSVD	GSK3;Proline-directed	0.05	0.0626406	87.842	_VNPHKVpSPASSVDSNIPSSQGYK_	VNPHKVS(0.789)PAS(0.172)S(0.039)VDSNIPSSQGYK	VNPHKVS(6.62)PAS(-6.62)S(-13.07)VDS(-39.29)NIPS(-61.75)S(-61.75)QGY(-73.39)K	7	3	826.727
76	46	679	679		614;1298	781;782;1619	4152	7517	TSenrich-100ughela-2	20818	1945	3374	TSenrich-100ughela-1	11659	IPI00004408;IPI00220754	IPI00004408	IPI00004408	Adducin-like protein 70;Gamma-adducin;Adducin 3 isoform a variant;Adducin 3 (Gamma);Adducin 3 (Gamma), isoform CRA_a;cDNA FLJ77558, highly similar to Homo sapiens adducin 3 (gamma) (ADD3), transcript variant 1, mRNA;Adducin-like protein 70;Gamma-adducin	ADD3;ADDL;hCG_1789399;RP11-252O7.3-001;ADD3;ADDL	Isoform 2 of Gamma-adducin;Isoform 1 of Gamma-adducin	Q9UEY8-1;Q9UEY8;Q53FL4;Q59EK1;Q5VU08;Q9UEY8-2	0.465639	0	0.0198067	-14.3864	0.00267597	118.44	0.465639	0	0.0232156	89.613	0.231997	-0.799731	0.103656	75.017		1	S	SPEGSPSKSPSKK	GSK3	0.081	0.00267597	118.44	_SPEKIEEVLSPEGSPpSKSPSK_	SPEKIEEVLSPEGS(0.012)PS(0.466)KS(0.466)PS(0.056)K	S(-89.61)PEKIEEVLS(-66.47)PEGS(-15.76)PS(0)KS(0)PS(-9.17)K	16	3	764.705
77	46	681	681	Phosphoserine	614;1298	781;782;1619	4152	7517	TSenrich-100ughela-2	20818	1945	3374	TSenrich-100ughela-1	11659	IPI00004408;IPI00220754	IPI00004408	IPI00004408	Adducin-like protein 70;Gamma-adducin;Adducin 3 isoform a variant;Adducin 3 (Gamma);Adducin 3 (Gamma), isoform CRA_a;cDNA FLJ77558, highly similar to Homo sapiens adducin 3 (gamma) (ADD3), transcript variant 1, mRNA;Adducin-like protein 70;Gamma-adducin	ADD3;ADDL;hCG_1789399;RP11-252O7.3-001;ADD3;ADDL	Isoform 2 of Gamma-adducin;Isoform 1 of Gamma-adducin	Q9UEY8-1;Q9UEY8;Q53FL4;Q59EK1;Q5VU08;Q9UEY8-2	0.465639	0	0.436136	-0.958293	0.00267597	118.44	0.465639	0	0.0232156	89.613	0.231997	-0.799731	0.103656	75.017		1	S	EGSPSKSPSKKKK	CDK1;CDK2;CK1;Proline-directed	0.0057	0.00267597	118.44	_SPEKIEEVLSPEGSPpSKSPSK_	SPEKIEEVLSPEGS(0.012)PS(0.466)KS(0.466)PS(0.056)K	S(-89.61)PEKIEEVLS(-66.47)PEGS(-15.76)PS(0)KS(0)PS(-9.17)K	18	3	764.705
78	47	3015	3015		1020	1278	3293	6067	TSenrich-100ughela-2	22893	3293	6067	TSenrich-100ughela-2	22893	IPI00796891;IPI00004671	IPI00796891	IPI00796891	Golgin B1;cDNA FLJ61596, highly similar to Golgin subfamily B member 1;372 kDa Golgi complex-associated protein;Giantin;Golgin subfamily B member 1;Macrogolgin	GOLGB1;GOLGB1	Golgin B1;Golgin subfamily B member 1	B2ZZ91;B4DTZ9;Q14789	0.953485	13.8233					0.953485	13.8233	9.83649e-09	137.32						1	S	QYQRQASPETSAS	CAMK2;GSK3;Proline-directed	0.042	9.83649e-09	137.32	_QApSPETSASPDGSQNLVYETELLR_	QAS(0.953)PET(0.04)S(0.007)ASPDGSQNLVYETELLR	QAS(13.82)PET(-13.82)S(-21.41)AS(-42.68)PDGS(-43.8)QNLVY(-73.68)ET(-84.69)ELLR	3	3	891.408
79	48	102	102	Phosphoserine	385	504	1256	2185	TSenrich-100ughela-2	20890	1254	2183	TSenrich-100ughela-3	21721	IPI00004795	IPI00004795	IPI00004795	Chloride channel, nucleotide sensitive 1A;Chloride conductance regulatory protein ICln;Chloride ion current inducer protein;Methylosome subunit pICln;Reticulocyte pICln;PRO1478	CLCI;CLNS1A;ICLN	Methylosome subunit pICln	P54105;Q9P1H0	0.999937	42.2177	0.999998	57.5111	1.71928e-09	134.94	0.999937	42.2177	5.20113e-06	128.32	1	66.7037	9.54382e-45	211.11		1	S	DEEEEDSDDDVEP	CK2	0.117	9.54382e-45	211.11	_FEEESKEPVADEEEEDpSDDDVEPITEFR_	FEEESKEPVADEEEEDS(1)DDDVEPITEFR	FEEES(-42.22)KEPVADEEEEDS(42.22)DDDVEPIT(-55.5)EFR	17	3	1132.12
80	50	296	296		1184	1472	3813	6986	TSenrich-100ughela-1	22494	3813	6986	TSenrich-100ughela-1	22494	IPI00005030;IPI00952831;IPI00383564	IPI00005030	IPI00005030	EH-binding protein 10;SH3 domain-binding protein 4;Transferrin receptor-trafficking protein;cDNA FLJ77256, highly similar to Homo sapiens SH3-domain binding protein 4 (SH3BP4), mRNA;cDNA FLJ61205, highly similar to Homo sapiens SH3-domain binding protein 4 (SH3BP4), mRNA;Putative uncharacterized protein SH3BP4;EH-binding protein 10;SH3 domain-binding protein 4;Transferrin receptor-trafficking pro…	BOG25;EHB10;SH3BP4;TTP;SH3BP4;BOG25;EHB10;SH3BP4;TTP	Isoform 1 of SH3 domain-binding protein 4;Uncharacterized protein;Isoform 2 of SH3 domain-binding protein 4	Q9P0V3-1;Q9P0V3;A8K594;B4E2S1;C9J137;C9JED2;Q9P0V3-2	0.99993	41.5725	0.99993	41.5725	7.20759e-06	124.13										1	S	HRKLARSCHDLDL	CK2;NEK6	0.076	7.20759e-06	124.13	_pSCHDLDLLGQSPGWGQTQAVETNIVCK_	S(1)CHDLDLLGQSPGWGQTQAVETNIVCK	S(41.57)CHDLDLLGQS(-41.57)PGWGQT(-63.81)QAVET(-78.14)NIVCK	1	3	1031.8
81	51	621	621	Phosphoserine	470	605	1503	2560	TSenrich-100ughela-2	19588	1501	2558	TSenrich-100ughela-3	19559	IPI00005036	IPI00005036	IPI00005036	Protein G15;Putative tumor suppressor LUCA15;Renal carcinoma antigen NY-REN-9;RNA-binding motif protein 5;RNA-binding protein 5;RNA binding motif protein 5 variant	H37;LUCA15;RBM5	Isoform 1 of RNA-binding protein 5	P52756-1;P52756;Q59HE6	0.993355	21.7168					0.993355	21.7168	8.69427e-17	173.37	0.99995	43.0112	4.46457e-44	204.98		2	S	GLVAAYSGDSDNE			4.46457e-44	204.98	_GLVAAYpSGDpSDNEEELVER_	GLVAAY(0.013)S(0.993)GDS(0.993)DNEEELVER	GLVAAY(-21.72)S(21.72)GDS(21.72)DNEEELVER	7	3	738.294
82	51	624	624	Phosphoserine	470	605	1503	2560	TSenrich-100ughela-2	19588	1501	2558	TSenrich-100ughela-3	19559	IPI00005036	IPI00005036	IPI00005036	Protein G15;Putative tumor suppressor LUCA15;Renal carcinoma antigen NY-REN-9;RNA-binding motif protein 5;RNA-binding protein 5;RNA binding motif protein 5 variant	H37;LUCA15;RBM5	Isoform 1 of RNA-binding protein 5	P52756-1;P52756;Q59HE6	0.993355	21.7168					0.993355	21.7168	8.69427e-17	173.37	1	82.6282	4.46457e-44	204.98		2	S	AAYSGDSDNEEEL	CK1;CK2	0.081	4.46457e-44	204.98	_GLVAAYpSGDpSDNEEELVER_	GLVAAY(0.013)S(0.993)GDS(0.993)DNEEELVER	GLVAAY(-21.72)S(21.72)GDS(21.72)DNEEELVER	10	3	738.294
83	52	371	371	Phosphoserine	222	288	710	1260	TSenrich-100ughela-2	13075	710	1260	TSenrich-100ughela-2	13075	IPI00005110;IPI00298944;IPI00219356	IPI00005110	IPI00005110	T-box transcription factor TBX3;T-box transcription factor TBX3;T-box transcription factor TBX3;Putative uncharacterized protein TBX3	TBX3;TBX3;TBX3	Isoform II of T-box transcription factor TBX3;Isoform I of T-box transcription factor TBX3;Isoform III of T-box transcription factor TBX3	O15119-1;O15119;O15119-2;O15119-3;C9JIZ8	0.999993	51.8448	0.999994	52.0029	0.17641	87.891	0.999993	51.8448	0.0219071	102.07	0.995905	23.8196	0.651935	65.413		2	S	LKDLCPSEGESDA	CK2;GSK3;NEK6	0.076	0.0219071	102.07	_DLCPpSEGEpSDAEAESKEEHGPEACDAAK_	DLCPS(1)EGES(1)DAEAESKEEHGPEACDAAK	DLCPS(51.84)EGES(40.03)DAEAES(-40.03)KEEHGPEACDAAK	5	3	1060.06
84	52	375	375	Phosphoserine	222	288	710	1260	TSenrich-100ughela-2	13075	710	1260	TSenrich-100ughela-2	13075	IPI00005110;IPI00298944;IPI00219356	IPI00005110	IPI00005110	T-box transcription factor TBX3;T-box transcription factor TBX3;T-box transcription factor TBX3;Putative uncharacterized protein TBX3	TBX3;TBX3;TBX3	Isoform II of T-box transcription factor TBX3;Isoform I of T-box transcription factor TBX3;Isoform III of T-box transcription factor TBX3	O15119-1;O15119;O15119-2;O15119-3;C9JIZ8	0.999901	40.0335	0.999622	34.2278	0.17641	87.891	0.999901	40.0335	0.0219071	102.07	0.990847	20.3263	0.651935	65.413		2	S	CPSEGESDAEAES	CK1;CK2	0.117	0.0219071	102.07	_DLCPpSEGEpSDAEAESKEEHGPEACDAAK_	DLCPS(1)EGES(1)DAEAESKEEHGPEACDAAK	DLCPS(51.84)EGES(40.03)DAEAES(-40.03)KEEHGPEACDAAK	9	3	1060.06
85	53	437	437	Phosphoserine	300	396	986	1717	TSenrich-100ughela-2	17731	986	1717	TSenrich-100ughela-2	17731	IPI00005154	IPI00005154	IPI00005154	Chromatin-specific transcription elongation factor 80 kDa subunit;Facilitates chromatin transcription complex 80 kDa subunit;Facilitates chromatin transcription complex subunit SSRP1;FACT complex subunit SSRP1;Recombination signal sequence recognition protein 1;Structure-specific recognition protein 1;T160	FACT80;SSRP1	FACT complex subunit SSRP1	Q08945	0.857286	7.9045	0.86819	8.90168	0.000858281	110.43	0.857286	7.9045	3.37575e-06	123.98	0.804204	6.95237	0.122364	85.23		2	S	KEGMNPSYDEYAD	CK2	0.117	3.37575e-06	123.98	_EGMNPpSYDEYADpSDEDQHDAYLER_	EGMNPS(0.857)Y(0.14)DEY(0.024)ADS(0.979)DEDQHDAYLER	EGMNPS(7.9)Y(-7.9)DEY(-16.92)ADS(16.92)DEDQHDAY(-49.85)LER	6	3	1003.69
86	53	444	444	Phosphoserine	300	396	986	1717	TSenrich-100ughela-2	17731	986	1717	TSenrich-100ughela-2	17731	IPI00005154	IPI00005154	IPI00005154	Chromatin-specific transcription elongation factor 80 kDa subunit;Facilitates chromatin transcription complex 80 kDa subunit;Facilitates chromatin transcription complex subunit SSRP1;FACT complex subunit SSRP1;Recombination signal sequence recognition protein 1;Structure-specific recognition protein 1;T160	FACT80;SSRP1	FACT complex subunit SSRP1	Q08945	0.979298	16.9202	0.98733	21.8034	0.000858281	110.43	0.979298	16.9202	3.37575e-06	123.98	0.933077	12.9137	0.122364	85.23		2	S	YDEYADSDEDQHD	CK2	0.117	3.37575e-06	123.98	_EGMNPpSYDEYADpSDEDQHDAYLER_	EGMNPS(0.857)Y(0.14)DEY(0.024)ADS(0.979)DEDQHDAYLER	EGMNPS(7.9)Y(-7.9)DEY(-16.92)ADS(16.92)DEDQHDAY(-49.85)LER	13	3	1003.69
87	54	310	310	Phosphoserine	672	846	2109	3682	TSenrich-100ughela-3	19298	2109	3682	TSenrich-100ughela-3	19298	IPI00005160;IPI00737530	IPI00005160	IPI00005160	Actin-related protein 2/3 complex subunit 1B;Arp2/3 complex 41 kDa subunit;p41-ARC;Actin related protein 2/3 complex, subunit 1B, 41kDa;Actin related protein 2/3 complex, subunit 1B, 41kDa, isoform CRA_a;cDNA, FLJ95695, Homo sapiens actin related protein 2/3 complex, subunit 1B, 41kDa(ARPC1B), mRNA	ARC41;ARPC1B;hCG_19475;tcag7.662	Actin-related protein 2/3 complex subunit 1B;similar to actin related protein 2/3 complex subunit 1B	O15143;A4D275	0.882658	8.78354									0.882658	8.78354	0.000165102	123.96		1	S	NLDKKASSEGGTA	CHK1;PKD	0.020748	0.000165102	123.96	_KApSSEGGTAAGAGLDSLHK_	KAS(0.883)S(0.117)EGGT(0.001)AAGAGLDSLHK	KAS(8.78)S(-8.78)EGGT(-32.1)AAGAGLDS(-108.5)LHK	3	3	612.954
88	55	1025	1025	Phosphoserine	944	1187	3104	5756	TSenrich-100ughela-2	15894	3104	5756	TSenrich-100ughela-2	15894	IPI00005184;IPI00184317;IPI00925852	IPI00005184	IPI00005184	RING finger protein 82;Transcription intermediary factor 1-alpha;Tripartite motif-containing protein 24;cDNA FLJ90825 fis, clone Y79AA1001523, highly similar to Transcription intermediary factor 1-alpha;Transcriptional intermediary factor 1;Tripartite motif-containing 24, isoform CRA_b;cDNA FLJ53462, highly similar to Transcription intermediary factor 1-alpha;RING finger protein 82;Transcription …	RNF82;TIF1;TIF1A;TRIM24;hCG_16386;tcag7.343;RNF82;TIF1;TIF1A;TRIM24;hCG_16386;tcag7.343;TRIM24	Isoform Long of Transcription intermediary factor 1-alpha;Isoform Short of Transcription intermediary factor 1-alpha;Uncharacterized protein	O15164-1;O15164;A4D1R8;B4DYZ9;O15164-2;A4D1R7;C9JPT4	1	92.4236	1	73.2612	6.67115e-07	137.37	1	92.4236	2.50212e-45	216.86	0.999996	54.3486	1.33649e-10	151.28		2	S	SEDNKFSDDSDDD			2.50212e-45	216.86	_NESEDNKFpSDDpSDDDFVQPR_	NESEDNKFS(1)DDS(1)DDDFVQPR	NES(-92.42)EDNKFS(92.42)DDS(111.15)DDDFVQPR	9	2	1259.95
89	55	1028	1028	Phosphoserine	944	1187	3104	5756	TSenrich-100ughela-2	15894	3104	5756	TSenrich-100ughela-2	15894	IPI00005184;IPI00184317;IPI00925852	IPI00005184	IPI00005184	RING finger protein 82;Transcription intermediary factor 1-alpha;Tripartite motif-containing protein 24;cDNA FLJ90825 fis, clone Y79AA1001523, highly similar to Transcription intermediary factor 1-alpha;Transcriptional intermediary factor 1;Tripartite motif-containing 24, isoform CRA_b;cDNA FLJ53462, highly similar to Transcription intermediary factor 1-alpha;RING finger protein 82;Transcription …	RNF82;TIF1;TIF1A;TRIM24;hCG_16386;tcag7.343;RNF82;TIF1;TIF1A;TRIM24;hCG_16386;tcag7.343;TRIM24	Isoform Long of Transcription intermediary factor 1-alpha;Isoform Short of Transcription intermediary factor 1-alpha;Uncharacterized protein	O15164-1;O15164;A4D1R8;B4DYZ9;O15164-2;A4D1R7;C9JPT4	1	111.153	1	87.3878	6.67115e-07	137.37	1	111.153	2.50212e-45	216.86	1	65.7676	1.33649e-10	151.28		2	S	NKFSDDSDDDFVQ	CK1;CK2	0.081	2.50212e-45	216.86	_NESEDNKFpSDDpSDDDFVQPR_	NESEDNKFS(1)DDS(1)DDDFVQPR	NES(-92.42)EDNKFS(92.42)DDS(111.15)DDDFVQPR	12	2	1259.95
90	57	114	114		1097	1362	3528	6508	TSenrich-100ughela-1	14058	3528	6508	TSenrich-100ughela-1	14058	IPI00005202	IPI00005202	IPI00005202	Membrane-associated progesterone receptor component 2;Progesterone membrane-binding protein;Steroid receptor protein DG6;Progesterone receptor membrane component 2, isoform CRA_a	DG6;PGRMC2;PMBP;hCG_16401	progesterone receptor membrane component 2	O15173;D3DNX8	0.484375	0.441576	0.484375	0.441576	0.0299379	88.118										1	S	AGAGEESPATSLP	GSK3;Proline-directed	0.05	0.0299379	88.118	_RGLGAGAGAGEEpSPATSLPR_	RGLGAGAGAGEES(0.484)PAT(0.438)S(0.078)LPR	RGLGAGAGAGEES(0.44)PAT(-0.44)S(-7.93)LPR	13	3	645.309
91	58	299	299		571	735	1834	3130	TSenrich-100ughela-1	18085	1834	3130	TSenrich-100ughela-1	18085	IPI00005477;IPI00892790	IPI00005477	IPI00005477	DNA-directed RNA polymerase I subunit RPA43;Twist neighbor protein	TWISTNB	DNA-directed RNA polymerase I subunit RPA43;37 kDa protein	Q3B726	0.736303	7.34521	0.736303	7.34521	4.64815e-13	158.83										1	S	VFQGSDSSGYQSD			4.64815e-13	158.83	_HQEVQDQDPVFQGSDpSSGYQSDHK_	HQEVQDQDPVFQGS(0.015)DS(0.736)S(0.136)GY(0.005)QS(0.108)DHK	HQEVQDQDPVFQGS(-16.89)DS(7.35)S(-7.35)GY(-21.98)QS(-8.32)DHK	16	3	933.382
92	58	316	316	Phosphoserine	706;707	892;893	2309	4076	TSenrich-100ughela-2	22654	2303	4068	TSenrich-100ughela-1	21582	IPI00005477;IPI00892790	IPI00005477	IPI00005477	DNA-directed RNA polymerase I subunit RPA43;Twist neighbor protein	TWISTNB	DNA-directed RNA polymerase I subunit RPA43;37 kDa protein	Q3B726	0.999999	60.663	0.999867	38.7508	6.04968e-08	145.02	0.999999	60.663	0.00576781	116.35	0.998258	27.5808	0.176038	70.795		2	S	KKKRKHSEEAEFT	CAMK2;PKA	0.003024	6.04968e-08	145.02	_KHpSEEAEFTPPLKCpSPK_	KHS(1)EEAEFTPPLKCS(1)PK	KHS(60.66)EEAEFT(-60.66)PPLKCS(70.34)PK	3	3	715.642
93	58	328	328	Phosphoserine	707	893	2309	4076	TSenrich-100ughela-2	22654	2309	4076	TSenrich-100ughela-2	22654	IPI00005477;IPI00892790	IPI00005477	IPI00005477	DNA-directed RNA polymerase I subunit RPA43;Twist neighbor protein	TWISTNB	DNA-directed RNA polymerase I subunit RPA43;37 kDa protein	Q3B726	1	70.3424	1	65.8074	0.0717056	77.509	1	70.3424	0.00576781	116.35	0.999992	51.0265	0.176038	70.795		2	S	TPPLKCSPKRKGK	CDK1;CDK2;NEK6;Proline-directed	0.0057	0.00576781	116.35	_KHpSEEAEFTPPLKCpSPK_	KHS(1)EEAEFTPPLKCS(1)PK	KHS(60.66)EEAEFT(-60.66)PPLKCS(70.34)PK	15	3	715.642
94	59	101	101	Phosphoserine	1459	1839	4722	8383	TSenrich-100ughela-2	17203	4722	8383	TSenrich-100ughela-2	17203	IPI00005502	IPI00005502	IPI00005502	Atrophin-1;Dentatorubral-pallidoluysian atrophy protein;Atrophin 1	ATN1;D12S755E;DRPLA	Atrophin 1	P54259;Q86V38	0.918977	9.78068					0.918977	9.78068	0.000569479	114.82						2	S	ELPRPQSPSDLDS	CAMK2;CHK1;CHK1/2;CK2;ERK/MAPK;PKD;Proline-directed;WW GroupIV	0.0023175	0.000569479	114.82	_TEQELPRPQpSPSDLDpSLDGR_	TEQELPRPQS(0.919)PS(0.23)DLDS(0.851)LDGR	T(-83.39)EQELPRPQS(9.78)PS(-7.15)DLDS(7.15)LDGR	10	3	800.675
95	59	107	107	Phosphoserine	1459	1839	4722	8383	TSenrich-100ughela-2	17203	4722	8383	TSenrich-100ughela-2	17203	IPI00005502	IPI00005502	IPI00005502	Atrophin-1;Dentatorubral-pallidoluysian atrophy protein;Atrophin 1	ATN1;D12S755E;DRPLA	Atrophin 1	P54259;Q86V38	0.851353	7.14522					0.851353	7.14522	0.000569479	114.82						2	S	SPSDLDSLDGRSL	CK1	0.143	0.000569479	114.82	_TEQELPRPQpSPSDLDpSLDGR_	TEQELPRPQS(0.919)PS(0.23)DLDS(0.851)LDGR	T(-83.39)EQELPRPQS(9.78)PS(-7.15)DLDS(7.15)LDGR	16	3	800.675
96	60	362	362		1417	1785;1786	4594	8164	TSenrich-100ughela-1	12284	4594	8164	TSenrich-100ughela-1	12284	IPI00644290;IPI00005605;IPI00218503;IPI00218504	IPI00644290	IPI00644290	NDRG family member 3;NDRG family member 3, isoform CRA_c;Protein NDRG3;Protein NDRG3;cDNA FLJ52497, highly similar to Protein NDRG3;cDNA FLJ54521, highly similar to Protein NDRG3;NDRG3 protein;Protein NDRG3	hCG_1785125;NDRG3;RP3-460J8.1-003;NDRG3;NDRG3;NDRG3	NDRG family member 3, isoform CRA_c;Isoform 1 of Protein NDRG3;Isoform 2 of Protein NDRG3;Isoform 3 of Protein NDRG3	Q5TH30;Q9UGV2-1;Q9UGV2;Q9UGV2-2;B7Z323;B7Z341;B7ZLZ9;Q9UGV2-3	0.288424	0	0.288424	0	0.0528153	86.894					0.358134	0	0.263125	72.368		1	S	FSRSVTSNQSDGT	CK1	0.081	0.0528153	86.894	_SVTpSNQSDGTQESCESPDVLDR_	S(0.061)VT(0.061)S(0.288)NQS(0.288)DGT(0.288)QES(0.014)CESPDVLDR	S(-6.78)VT(-6.78)S(0)NQS(0)DGT(0)QES(-13.25)CES(-45.97)PDVLDR	4	3	831.002
97	60	365	365		1417	1785;1786	4594	8164	TSenrich-100ughela-1	12284	4594	8164	TSenrich-100ughela-1	12284	IPI00644290;IPI00005605;IPI00218503;IPI00218504	IPI00644290	IPI00644290	NDRG family member 3;NDRG family member 3, isoform CRA_c;Protein NDRG3;Protein NDRG3;cDNA FLJ52497, highly similar to Protein NDRG3;cDNA FLJ54521, highly similar to Protein NDRG3;NDRG3 protein;Protein NDRG3	hCG_1785125;NDRG3;RP3-460J8.1-003;NDRG3;NDRG3;NDRG3	NDRG family member 3, isoform CRA_c;Isoform 1 of Protein NDRG3;Isoform 2 of Protein NDRG3;Isoform 3 of Protein NDRG3	Q5TH30;Q9UGV2-1;Q9UGV2;Q9UGV2-2;B7Z323;B7Z341;B7ZLZ9;Q9UGV2-3	0.288424	0	0.288424	0	0.0528153	86.894					0.177296	-7.2246	0.263125	72.368		1	S	SVTSNQSDGTQES	CK1	0.081	0.0528153	86.894	_SVTpSNQSDGTQESCESPDVLDR_	S(0.061)VT(0.061)S(0.288)NQS(0.288)DGT(0.288)QES(0.014)CESPDVLDR	S(-6.78)VT(-6.78)S(0)NQS(0)DGT(0)QES(-13.25)CES(-45.97)PDVLDR	7	3	831.002
98	61	2338	2338		121	161	399	635	TSenrich-100ughela-2	18556	398	634	TSenrich-100ughela-1	17064	IPI00005614	IPI00005614	IPI00005614	Beta-II spectrin;Fodrin beta chain;Spectrin beta chain, brain 1;Spectrin, non-erythroid beta chain 1;Spectrin beta non-erythrocytic 1;Spectrin, beta, non-erythrocytic 1, isoform CRA_d;cDNA FLJ55845, highly similar to Spectrin beta chain, brain 1;Spectrin, beta, non-erythrocytic 1, isoform CRA_c	SPTB2;SPTBN1;hCG_17370	Isoform Long of Spectrin beta chain, brain 1	Q01082-1;Q01082;B2ZZ89;B4DIF8;D6W5C0	0.238426	0	0.0761212	-7.29922	4.15182e-16	163.16	0.238426	0	0.0741963	81.021	0.150704	0	0.182813	73.035		1	S	SVVTITSESSPGK			4.15182e-16	163.16	_AQTLPTSVVTIpTSESSPGKR_	AQTLPT(0.007)S(0.007)VVT(0.032)IT(0.238)S(0.238)ES(0.238)S(0.238)PGKR	AQT(-53.38)LPT(-15.15)S(-15.15)VVT(-8.76)IT(0)S(0)ES(0)S(0)PGKR	13	3	713.695
99	61	2340	2340		121	161	399	635	TSenrich-100ughela-2	18556	398	634	TSenrich-100ughela-1	17064	IPI00005614	IPI00005614	IPI00005614	Beta-II spectrin;Fodrin beta chain;Spectrin beta chain, brain 1;Spectrin, non-erythroid beta chain 1;Spectrin beta non-erythrocytic 1;Spectrin, beta, non-erythrocytic 1, isoform CRA_d;cDNA FLJ55845, highly similar to Spectrin beta chain, brain 1;Spectrin, beta, non-erythrocytic 1, isoform CRA_c	SPTB2;SPTBN1;hCG_17370	Isoform Long of Spectrin beta chain, brain 1	Q01082-1;Q01082;B2ZZ89;B4DIF8;D6W5C0	0.238426	0	0.408721	0	4.15182e-16	163.16	0.238426	0	0.0741963	81.021	0.150704	0	0.182813	73.035		1	S	VTITSESSPGKRE			4.15182e-16	163.16	_AQTLPTSVVTIpTSESSPGKR_	AQTLPT(0.007)S(0.007)VVT(0.032)IT(0.238)S(0.238)ES(0.238)S(0.238)PGKR	AQT(-53.38)LPT(-15.15)S(-15.15)VVT(-8.76)IT(0)S(0)ES(0)S(0)PGKR	15	3	713.695
100	61	2341	2341	Phosphoserine	121	161	399	635	TSenrich-100ughela-2	18556	398	634	TSenrich-100ughela-1	17064	IPI00005614	IPI00005614	IPI00005614	Beta-II spectrin;Fodrin beta chain;Spectrin beta chain, brain 1;Spectrin, non-erythroid beta chain 1;Spectrin beta non-erythrocytic 1;Spectrin, beta, non-erythrocytic 1, isoform CRA_d;cDNA FLJ55845, highly similar to Spectrin beta chain, brain 1;Spectrin, beta, non-erythrocytic 1, isoform CRA_c	SPTB2;SPTBN1;hCG_17370	Isoform Long of Spectrin beta chain, brain 1	Q01082-1;Q01082;B2ZZ89;B4DIF8;D6W5C0	0.238426	0	0.408721	0	4.15182e-16	163.16	0.238426	0	0.0741963	81.021	0.150704	0	0.182813	73.035		1	S	TITSESSPGKREK	CDK1;CDK2;CK1;Polo box;Proline-directed	0.00405	4.15182e-16	163.16	_AQTLPTSVVTIpTSESSPGKR_	AQTLPT(0.007)S(0.007)VVT(0.032)IT(0.238)S(0.238)ES(0.238)S(0.238)PGKR	AQT(-53.38)LPT(-15.15)S(-15.15)VVT(-8.76)IT(0)S(0)ES(0)S(0)PGKR	16	3	713.695
101	62	70	70		188	244	613	1096	TSenrich-100ughela-2	24957	611	1092	TSenrich-100ughela-1	23579	IPI00005670;IPI00514175;IPI00514360	IPI00005670	IPI00005670	Cell division cycle protein 123 homolog;HT-1080;PZ32	C10orf7;CDC123;D123	Cell division cycle protein 123 homolog;36 kDa protein;34 kDa protein	O75794	0.345807	0	0.162081	-6.88004	0.0733174	117.83	0.345807	0	0.661728	95.644						2	S	AEEIQWSDDENTA	CK2	0.117	0.0733174	117.83	_DDPPTHSQPDSDDEAEEIQWpSDDENTATLpTAPEFPEFATK_	DDPPT(0.108)HS(0.175)QPDS(0.175)DDEAEEIQWS(0.346)DDENT(0.317)AT(0.317)LT(0.494)APEFPEFAT(0.069)K	DDPPT(-7.55)HS(-4.11)QPDS(-4.11)DDEAEEIQWS(0)DDENT(0)AT(0)LT(3.95)APEFPEFAT(-9.56)K	21	4	1159.72
102	63	478	478		440	567	1415	2425	TSenrich-100ughela-2	14681	1414	2424	TSenrich-100ughela-1	13376	IPI00921909;IPI00646811;IPI00647837;IPI00005688;IPI00939196;IPI00970888;IPI00641065;IPI00166240;IPI00385027	IPI00921909	IPI00921909	Zinc finger protein 185 variant 721;Zinc finger protein 185 variant 692;LIM domain protein ZNF185;P1-A;Zinc finger protein 185;LIM domain protein ZNF185;P1-A;Zinc finger protein 185;cDNA FLJ54762, highly similar to Zinc finger protein 185;Zinc finger protein 185 variant 630;Zinc finger protein 185 variant 660;Putative uncharacterized protein DKFZp686B22130;LIM domain protein ZNF185;P1-A;Zinc fing…	ZNF185;ZNF185;ZNF185;ZNF185;DKFZp686B22130;ZNF185;hCG_39570;ZNF185;DKFZp686O1389	Zinc finger protein 185 variant 721;Zinc finger protein 185 variant 692;Isoform 3 of Zinc finger protein 185;Isoform 1 of Zinc finger protein 185;Putative uncharacterized protein DKFZp686B22130 (Fragment);Isoform 2 of Zinc finger protein 185;cDNA FLJ52900,	B8K2M1;B8K2M2;O15231-3;O15231;O15231-1;B7Z771;B8K2L9;B8K2M0;Q6MZQ8;O15231-2;B4E2L1;B3KPM4;Q8N1R8;Q7Z3Q8	0.944098	12.3831	0.940647	12.5365	0.0205656	112.64	0.944098	12.3831	0.0354151	108.09	0.501005	0	0.0282782	110.27		2	S	QQPADPSTPERQS	CK2	0.117	0.0205656	112.64	_GGQGDPAVPAQQPADPpSTPERQpSSPSGSEQLVR_	GGQGDPAVPAQQPADPS(0.944)T(0.056)PERQS(0.307)S(0.307)PS(0.307)GS(0.079)EQLVR	GGQGDPAVPAQQPADPS(12.38)T(-12.38)PERQS(0)S(0)PS(0)GS(-5.93)EQLVR	17	3	1164.18
103	63	484	484		440	567	1415	2425	TSenrich-100ughela-2	14681	1414	2424	TSenrich-100ughela-1	13376	IPI00921909;IPI00646811;IPI00647837;IPI00005688;IPI00939196;IPI00970888;IPI00641065;IPI00166240;IPI00385027	IPI00921909	IPI00921909	Zinc finger protein 185 variant 721;Zinc finger protein 185 variant 692;LIM domain protein ZNF185;P1-A;Zinc finger protein 185;LIM domain protein ZNF185;P1-A;Zinc finger protein 185;cDNA FLJ54762, highly similar to Zinc finger protein 185;Zinc finger protein 185 variant 630;Zinc finger protein 185 variant 660;Putative uncharacterized protein DKFZp686B22130;LIM domain protein ZNF185;P1-A;Zinc fing…	ZNF185;ZNF185;ZNF185;ZNF185;DKFZp686B22130;ZNF185;hCG_39570;ZNF185;DKFZp686O1389	Zinc finger protein 185 variant 721;Zinc finger protein 185 variant 692;Isoform 3 of Zinc finger protein 185;Isoform 1 of Zinc finger protein 185;Putative uncharacterized protein DKFZp686B22130 (Fragment);Isoform 2 of Zinc finger protein 185;cDNA FLJ52900,	B8K2M1;B8K2M2;O15231-3;O15231;O15231-1;B7Z771;B8K2L9;B8K2M0;Q6MZQ8;O15231-2;B4E2L1;B3KPM4;Q8N1R8;Q7Z3Q8	0.307187	0	0.300529	0	0.0205656	112.64	0.307187	0	0.0354151	108.09	0.411364	0	0.0282782	110.27		2	S	STPERQSSPSGSE	PKA	0.042	0.0205656	112.64	_GGQGDPAVPAQQPADPpSTPERQpSSPSGSEQLVR_	GGQGDPAVPAQQPADPS(0.944)T(0.056)PERQS(0.307)S(0.307)PS(0.307)GS(0.079)EQLVR	GGQGDPAVPAQQPADPS(12.38)T(-12.38)PERQS(0)S(0)PS(0)GS(-5.93)EQLVR	23	3	1164.18
104	63	485	485		440	567	1415	2425	TSenrich-100ughela-2	14681	1414	2424	TSenrich-100ughela-1	13376	IPI00921909;IPI00646811;IPI00647837;IPI00005688;IPI00939196;IPI00970888;IPI00641065;IPI00166240;IPI00385027	IPI00921909	IPI00921909	Zinc finger protein 185 variant 721;Zinc finger protein 185 variant 692;LIM domain protein ZNF185;P1-A;Zinc finger protein 185;LIM domain protein ZNF185;P1-A;Zinc finger protein 185;cDNA FLJ54762, highly similar to Zinc finger protein 185;Zinc finger protein 185 variant 630;Zinc finger protein 185 variant 660;Putative uncharacterized protein DKFZp686B22130;LIM domain protein ZNF185;P1-A;Zinc fing…	ZNF185;ZNF185;ZNF185;ZNF185;DKFZp686B22130;ZNF185;hCG_39570;ZNF185;DKFZp686O1389	Zinc finger protein 185 variant 721;Zinc finger protein 185 variant 692;Isoform 3 of Zinc finger protein 185;Isoform 1 of Zinc finger protein 185;Putative uncharacterized protein DKFZp686B22130 (Fragment);Isoform 2 of Zinc finger protein 185;cDNA FLJ52900,	B8K2M1;B8K2M2;O15231-3;O15231;O15231-1;B7Z771;B8K2L9;B8K2M0;Q6MZQ8;O15231-2;B4E2L1;B3KPM4;Q8N1R8;Q7Z3Q8	0.307187	0	0.300529	0	0.0205656	112.64	0.307187	0	0.0354151	108.09	0.411364	0	0.0282782	110.27		2	S	TPERQSSPSGSEQ	CAMK2;GSK3;Polo box;Proline-directed	0.00405	0.0205656	112.64	_GGQGDPAVPAQQPADPpSTPERQpSSPSGSEQLVR_	GGQGDPAVPAQQPADPS(0.944)T(0.056)PERQS(0.307)S(0.307)PS(0.307)GS(0.079)EQLVR	GGQGDPAVPAQQPADPS(12.38)T(-12.38)PERQS(0)S(0)PS(0)GS(-5.93)EQLVR	24	3	1164.18
105	63	487	487		440	567	1415	2425	TSenrich-100ughela-2	14681	1414	2424	TSenrich-100ughela-1	13376	IPI00921909;IPI00646811;IPI00647837;IPI00005688;IPI00939196;IPI00970888;IPI00641065;IPI00166240;IPI00385027	IPI00921909	IPI00921909	Zinc finger protein 185 variant 721;Zinc finger protein 185 variant 692;LIM domain protein ZNF185;P1-A;Zinc finger protein 185;LIM domain protein ZNF185;P1-A;Zinc finger protein 185;cDNA FLJ54762, highly similar to Zinc finger protein 185;Zinc finger protein 185 variant 630;Zinc finger protein 185 variant 660;Putative uncharacterized protein DKFZp686B22130;LIM domain protein ZNF185;P1-A;Zinc fing…	ZNF185;ZNF185;ZNF185;ZNF185;DKFZp686B22130;ZNF185;hCG_39570;ZNF185;DKFZp686O1389	Zinc finger protein 185 variant 721;Zinc finger protein 185 variant 692;Isoform 3 of Zinc finger protein 185;Isoform 1 of Zinc finger protein 185;Putative uncharacterized protein DKFZp686B22130 (Fragment);Isoform 2 of Zinc finger protein 185;cDNA FLJ52900,	B8K2M1;B8K2M2;O15231-3;O15231;O15231-1;B7Z771;B8K2L9;B8K2M0;Q6MZQ8;O15231-2;B4E2L1;B3KPM4;Q8N1R8;Q7Z3Q8	0.307125	0	0.300529	0	0.0205656	112.64	0.307125	0	0.0354151	108.09	0.0876309	-6.73671	0.0282782	110.27		2	S	ERQSSPSGSEQLV	CK1;CK2	0.081	0.0205656	112.64	_GGQGDPAVPAQQPADPpSTPERQpSSPSGSEQLVR_	GGQGDPAVPAQQPADPS(0.944)T(0.056)PERQS(0.307)S(0.307)PS(0.307)GS(0.079)EQLVR	GGQGDPAVPAQQPADPS(12.38)T(-12.38)PERQS(0)S(0)PS(0)GS(-5.93)EQLVR	26	3	1164.18
106	64	79	79		1342	1679;1680;1681;1682	4307	7720	TSenrich-100ughela-2	16272	4300	7712	TSenrich-100ughela-3	16934	IPI00005715;IPI00555735	IPI00005715	IPI00005715	Homozygously deleted in neuroblastoma 1;Ubiquitin conjugation factor E4 B;Ubiquitin fusion degradation protein 2;Homozygously deleted in neuroblastoma 1;Ubiquitin conjugation factor E4 B;Ubiquitin fusion degradation protein 2;cDNA FLJ78424, highly similar to Homo sapiens ubiquitination factor E4B (UFD2 homolog, yeast) (UBE4B), mRNA;cDNA FLJ50370, highly similar to Ubiquitin conjugation factor E4 B	HDNB1;KIAA0684;UBE4B;UFD2;HDNB1;KIAA0684;UBE4B;UFD2	Isoform 1 of Ubiquitin conjugation factor E4 B;Isoform 2 of Ubiquitin conjugation factor E4 B	O95155-1;O95155;O95155-2;A8K8S9;B4E2Y2	0.364717	0.339264	0.189003	0.336056	1.19768e-14	152.71	0.364717	0.339264	0.0914316	98.525	0.191769	-3.91308	2.61477e-56	220.42		4	S	AHRSQSSEGVSSL	CK1;GSK3	0.081	2.61477e-56	220.42	_SQSpSEGVpSpSLSSSPSNSLETQSQpSLSR_	S(0.296)QS(0.34)S(0.365)EGVS(0.282)S(0.459)LS(0.291)S(0.244)S(0.539)PS(0.165)NS(0.02)LET(0.024)QS(0.058)QS(0.491)LS(0.426)R	S(-1.01)QS(-0.34)S(0.34)EGVS(0.68)S(0.68)LS(-0.68)S(-0.68)S(-0.68)PS(-6.3)NS(-18.32)LET(-14.58)QS(-10.22)QS(0.68)LS(-0.68)R	4	3	1026.05
107	64	83	83		1342	1679;1680;1681;1682	4307	7720	TSenrich-100ughela-2	16272	4300	7712	TSenrich-100ughela-3	16934	IPI00005715;IPI00555735	IPI00005715	IPI00005715	Homozygously deleted in neuroblastoma 1;Ubiquitin conjugation factor E4 B;Ubiquitin fusion degradation protein 2;Homozygously deleted in neuroblastoma 1;Ubiquitin conjugation factor E4 B;Ubiquitin fusion degradation protein 2;cDNA FLJ78424, highly similar to Homo sapiens ubiquitination factor E4B (UFD2 homolog, yeast) (UBE4B), mRNA;cDNA FLJ50370, highly similar to Ubiquitin conjugation factor E4 B	HDNB1;KIAA0684;UBE4B;UFD2;HDNB1;KIAA0684;UBE4B;UFD2	Isoform 1 of Ubiquitin conjugation factor E4 B;Isoform 2 of Ubiquitin conjugation factor E4 B	O95155-1;O95155;O95155-2;A8K8S9;B4E2Y2	0.28157	0.67531	0.217641	-2.80443	1.19768e-14	152.71	0.28157	0.67531	0.0914316	98.525	0.108669	-7.9835	2.61477e-56	220.42		4	S	QSSEGVSSLSSSP	CK1;GSK3	0.081	2.61477e-56	220.42	_SQSpSEGVpSpSLSSSPSNSLETQSQpSLSR_	S(0.296)QS(0.34)S(0.365)EGVS(0.282)S(0.459)LS(0.291)S(0.244)S(0.539)PS(0.165)NS(0.02)LET(0.024)QS(0.058)QS(0.491)LS(0.426)R	S(-1.01)QS(-0.34)S(0.34)EGVS(0.68)S(0.68)LS(-0.68)S(-0.68)S(-0.68)PS(-6.3)NS(-18.32)LET(-14.58)QS(-10.22)QS(0.68)LS(-0.68)R	8	3	1026.05
108	64	84	84	Phosphoserine	1342	1679;1680;1681;1682	4307	7720	TSenrich-100ughela-2	16272	4300	7712	TSenrich-100ughela-3	16934	IPI00005715;IPI00555735	IPI00005715	IPI00005715	Homozygously deleted in neuroblastoma 1;Ubiquitin conjugation factor E4 B;Ubiquitin fusion degradation protein 2;Homozygously deleted in neuroblastoma 1;Ubiquitin conjugation factor E4 B;Ubiquitin fusion degradation protein 2;cDNA FLJ78424, highly similar to Homo sapiens ubiquitination factor E4B (UFD2 homolog, yeast) (UBE4B), mRNA;cDNA FLJ50370, highly similar to Ubiquitin conjugation factor E4 B	HDNB1;KIAA0684;UBE4B;UFD2;HDNB1;KIAA0684;UBE4B;UFD2	Isoform 1 of Ubiquitin conjugation factor E4 B;Isoform 2 of Ubiquitin conjugation factor E4 B	O95155-1;O95155;O95155-2;A8K8S9;B4E2Y2	0.459342	0.67531	0.218081	-2.80443	1.19768e-14	152.71	0.459342	0.67531	0.0914316	98.525	0.108669	-7.9835	2.61477e-56	220.42		4	S	SSEGVSSLSSSPS	GSK3	0.081	2.61477e-56	220.42	_SQSpSEGVpSpSLSSSPSNSLETQSQpSLSR_	S(0.296)QS(0.34)S(0.365)EGVS(0.282)S(0.459)LS(0.291)S(0.244)S(0.539)PS(0.165)NS(0.02)LET(0.024)QS(0.058)QS(0.491)LS(0.426)R	S(-1.01)QS(-0.34)S(0.34)EGVS(0.68)S(0.68)LS(-0.68)S(-0.68)S(-0.68)PS(-6.3)NS(-18.32)LET(-14.58)QS(-10.22)QS(0.68)LS(-0.68)R	9	3	1026.05
109	64	99	99		1342	1679;1680;1681;1682	4307	7720	TSenrich-100ughela-2	16272	4300	7712	TSenrich-100ughela-3	16934	IPI00005715;IPI00555735	IPI00005715	IPI00005715	Homozygously deleted in neuroblastoma 1;Ubiquitin conjugation factor E4 B;Ubiquitin fusion degradation protein 2;Homozygously deleted in neuroblastoma 1;Ubiquitin conjugation factor E4 B;Ubiquitin fusion degradation protein 2;cDNA FLJ78424, highly similar to Homo sapiens ubiquitination factor E4B (UFD2 homolog, yeast) (UBE4B), mRNA;cDNA FLJ50370, highly similar to Ubiquitin conjugation factor E4 B	HDNB1;KIAA0684;UBE4B;UFD2;HDNB1;KIAA0684;UBE4B;UFD2	Isoform 1 of Ubiquitin conjugation factor E4 B;Isoform 2 of Ubiquitin conjugation factor E4 B	O95155-1;O95155;O95155-2;A8K8S9;B4E2Y2	0.491323	0.67531	0.204855	-5.66074	1.19768e-14	152.71	0.491323	0.67531	0.0914316	98.525	0.323236	0	2.61477e-56	220.42		4	S	LETQSQSLSRSQS	CK1;GSK3	0.081	2.61477e-56	220.42	_SQSpSEGVpSpSLSSSPSNSLETQSQpSLSR_	S(0.296)QS(0.34)S(0.365)EGVS(0.282)S(0.459)LS(0.291)S(0.244)S(0.539)PS(0.165)NS(0.02)LET(0.024)QS(0.058)QS(0.491)LS(0.426)R	S(-1.01)QS(-0.34)S(0.34)EGVS(0.68)S(0.68)LS(-0.68)S(-0.68)S(-0.68)PS(-6.3)NS(-18.32)LET(-14.58)QS(-10.22)QS(0.68)LS(-0.68)R	24	3	1026.05
110	65	19	19	Phosphoserine	38	51;52	118	184	TSenrich-100ughela-1	16199	118	184	TSenrich-100ughela-1	16199	IPI00792208;IPI00005717	IPI00792208	IPI00792208	Estrogen receptor-like 1;Estrogen-related receptor alpha;Nuclear receptor subfamily 3 group B member 1;Steroid hormone receptor ERR1;ESRRA protein;HCG2016877, isoform CRA_b;Similar to estrogen-related receptor alpha;Estrogen receptor-like 1;Estrogen-related receptor alpha;Nuclear receptor subfamily 3 group B member 1;Steroid hormone receptor ERR1;Putative uncharacterized protein	ERR1;ESRL1;ESRRA;NR3B1;hCG_2016877;ERR1;ESRL1;ESRRA;NR3B1	Isoform 1 of Steroid hormone receptor ERR1;Isoform 2 of Steroid hormone receptor ERR1	P11474-1;P11474;Q569H8;Q8N4S8;Q96I02;P11474-2;Q96F89	0.968679	14.991	0.968679	14.991	0.0835332	100.7										3	S	IKAEPASPDSPKG	ERK/MAPK;Proline-directed;WW GroupIV	0.0023175	0.0835332	100.7	_AEPApSPDpSPKGpSSETETEPPVALAPGPAPTR_	AEPAS(0.969)PDS(0.871)PKGS(0.43)S(0.43)ET(0.299)ET(0.003)EPPVALAPGPAPTR	AEPAS(14.99)PDS(7.9)PKGS(0)S(0)ET(-1.86)ET(-23.92)EPPVALAPGPAPT(-81.7)R	5	3	1095.13
111	65	22	22	Phosphoserine	38	51;52	118	184	TSenrich-100ughela-1	16199	118	184	TSenrich-100ughela-1	16199	IPI00792208;IPI00005717	IPI00792208	IPI00792208	Estrogen receptor-like 1;Estrogen-related receptor alpha;Nuclear receptor subfamily 3 group B member 1;Steroid hormone receptor ERR1;ESRRA protein;HCG2016877, isoform CRA_b;Similar to estrogen-related receptor alpha;Estrogen receptor-like 1;Estrogen-related receptor alpha;Nuclear receptor subfamily 3 group B member 1;Steroid hormone receptor ERR1;Putative uncharacterized protein	ERR1;ESRL1;ESRRA;NR3B1;hCG_2016877;ERR1;ESRL1;ESRRA;NR3B1	Isoform 1 of Steroid hormone receptor ERR1;Isoform 2 of Steroid hormone receptor ERR1	P11474-1;P11474;Q569H8;Q8N4S8;Q96I02;P11474-2;Q96F89	0.870971	7.90025	0.870971	7.90025	0.0835332	100.7										3	S	EPASPDSPKGSSE	CDK1;CK1;ERK/MAPK;GSK3;Proline-directed;WW GroupIV	0.0023175	0.0835332	100.7	_AEPApSPDpSPKGpSSETETEPPVALAPGPAPTR_	AEPAS(0.969)PDS(0.871)PKGS(0.43)S(0.43)ET(0.299)ET(0.003)EPPVALAPGPAPTR	AEPAS(14.99)PDS(7.9)PKGS(0)S(0)ET(-1.86)ET(-23.92)EPPVALAPGPAPT(-81.7)R	8	3	1095.13
112	65	26	26	Phosphoserine	38	51;52	118	184	TSenrich-100ughela-1	16199	118	184	TSenrich-100ughela-1	16199	IPI00792208;IPI00005717	IPI00792208	IPI00792208	Estrogen receptor-like 1;Estrogen-related receptor alpha;Nuclear receptor subfamily 3 group B member 1;Steroid hormone receptor ERR1;ESRRA protein;HCG2016877, isoform CRA_b;Similar to estrogen-related receptor alpha;Estrogen receptor-like 1;Estrogen-related receptor alpha;Nuclear receptor subfamily 3 group B member 1;Steroid hormone receptor ERR1;Putative uncharacterized protein	ERR1;ESRL1;ESRRA;NR3B1;hCG_2016877;ERR1;ESRL1;ESRRA;NR3B1	Isoform 1 of Steroid hormone receptor ERR1;Isoform 2 of Steroid hormone receptor ERR1	P11474-1;P11474;Q569H8;Q8N4S8;Q96I02;P11474-2;Q96F89	0.429612	0	0.429612	0	0.0835332	100.7										3	S	PDSPKGSSETETE	CK1	0.143	0.0835332	100.7	_AEPApSPDpSPKGpSSETETEPPVALAPGPAPTR_	AEPAS(0.969)PDS(0.871)PKGS(0.43)S(0.43)ET(0.299)ET(0.003)EPPVALAPGPAPTR	AEPAS(14.99)PDS(7.9)PKGS(0)S(0)ET(-1.86)ET(-23.92)EPPVALAPGPAPT(-81.7)R	12	3	1095.13
113	65	27	27	Phosphoserine	38	51;52	118	184	TSenrich-100ughela-1	16199	118	184	TSenrich-100ughela-1	16199	IPI00792208;IPI00005717	IPI00792208	IPI00792208	Estrogen receptor-like 1;Estrogen-related receptor alpha;Nuclear receptor subfamily 3 group B member 1;Steroid hormone receptor ERR1;ESRRA protein;HCG2016877, isoform CRA_b;Similar to estrogen-related receptor alpha;Estrogen receptor-like 1;Estrogen-related receptor alpha;Nuclear receptor subfamily 3 group B member 1;Steroid hormone receptor ERR1;Putative uncharacterized protein	ERR1;ESRL1;ESRRA;NR3B1;hCG_2016877;ERR1;ESRL1;ESRRA;NR3B1	Isoform 1 of Steroid hormone receptor ERR1;Isoform 2 of Steroid hormone receptor ERR1	P11474-1;P11474;Q569H8;Q8N4S8;Q96I02;P11474-2;Q96F89	0.429612	0	0.429612	0	0.0835332	100.7										3	S	DSPKGSSETETEP	CK2	0.117	0.0835332	100.7	_AEPApSPDpSPKGpSSETETEPPVALAPGPAPTR_	AEPAS(0.969)PDS(0.871)PKGS(0.43)S(0.43)ET(0.299)ET(0.003)EPPVALAPGPAPTR	AEPAS(14.99)PDS(7.9)PKGS(0)S(0)ET(-1.86)ET(-23.92)EPPVALAPGPAPT(-81.7)R	13	3	1095.13
114	66	588	588	Phosphoserine	1161	1442	3746	6870	TSenrich-100ughela-2	19613	3744	6868	TSenrich-100ughela-3	19767	IPI00005822;IPI00939517	IPI00005822	IPI00005822	Anaphase-promoting complex subunit 8;Cell division cycle protein 23 homolog;Cyclosome subunit 8;Anaphase-promoting complex subunit 8;Cell division cycle protein 23 homolog;Cyclosome subunit 8	ANAPC8;CDC23;ANAPC8;CDC23	Isoform 1 of Cell division cycle protein 23 homolog;Isoform 3 of Cell division cycle protein 23 homolog	Q9UJX2-1;Q9UJX2;Q9UJX2-3	1	64.5023	0.999997	55.802	8.86561e-05	122.21	1	64.5023	0.00403881	111.78	0.999791	36.7972	3.47972e-08	139.65		2	S	TPTRRVSPLNLSS	CAMK2;CK1;PKA;Proline-directed	0.004788	3.47972e-08	139.65	_RVpSPLNLSSVpTP_	RVS(1)PLNLSSVT(1)P	RVS(64.5)PLNLS(-64.5)S(-45.59)VT(45.59)P	3	2	715.328
115	67	1938	1938		803	1020	2698	5009	TSenrich-100ughela-2	16385	2697	5008	TSenrich-100ughela-3	16546	IPI00005826	IPI00005826	IPI00005826	HECT domain and RCC1-like domain-containing protein 2;Probable E3 ubiquitin-protein ligase HERC2;HERC2 protein	HERC2	E3 ubiquitin-protein ligase HERC2	O95714;A8KAQ8	0.893548	11.236					0.893548	11.236	0.0391295	99.444	0.87734	10.9463	0.00360782	105.32		2	S	PAAAQPSAEDSDT	CK2;GSK3	0.081	0.00360782	105.32	_LAELPAAAQPpSAEDSDTEDDpSEAEQTER_	LAELPAAAQPS(0.894)AEDS(0.2)DT(0.2)EDDS(0.699)EAEQT(0.007)ER	LAELPAAAQPS(11.24)AEDS(-6.33)DT(-6.33)EDDS(6.33)EAEQT(-21.73)ER	11	3	1045.74
116	67	1948	1948		803	1020	2698	5009	TSenrich-100ughela-2	16385	2697	5008	TSenrich-100ughela-3	16546	IPI00005826	IPI00005826	IPI00005826	HECT domain and RCC1-like domain-containing protein 2;Probable E3 ubiquitin-protein ligase HERC2;HERC2 protein	HERC2	E3 ubiquitin-protein ligase HERC2	O95714;A8KAQ8	0.699298	6.32936					0.699298	6.32936	0.0391295	99.444	0.675033	6.53454	0.00360782	105.32		2	S	SDTEDDSEAEQTE	CK1;CK2	0.117	0.00360782	105.32	_LAELPAAAQPpSAEDSDTEDDpSEAEQTER_	LAELPAAAQPS(0.894)AEDS(0.2)DT(0.2)EDDS(0.699)EAEQT(0.007)ER	LAELPAAAQPS(11.24)AEDS(-6.33)DT(-6.33)EDDS(6.33)EAEQT(-21.73)ER	21	3	1045.74
117	68	464	464	Phosphoserine	1291	1608	4125	7463	TSenrich-100ughela-2	15169	4125	7463	TSenrich-100ughela-2	15169	IPI00005858;IPI00470672	IPI00005858	IPI00005858	Large tumor suppressor homolog 1;Serine/threonine-protein kinase LATS1;WARTS protein kinase;LATS homolog 1 variant;Large tumor suppressor homolog 1;Serine/threonine-protein kinase LATS1;WARTS protein kinase	LATS1;WARTS;LATS1;WARTS	Isoform 1 of Serine/threonine-protein kinase LATS1;Isoform 2 of Serine/threonine-protein kinase LATS1	O95835-1;O95835;Q59FN4;O95835-2	0.907662	9.92542					0.907662	9.92542	0.00144091	113.54						1	S	IPVRSNSFNNPLG	CAMK2	0.042	0.00144091	113.54	_SNpSFNNPLGNR_	S(0.092)NS(0.908)FNNPLGNR	S(-9.93)NS(9.93)FNNPLGNR	3	2	650.278
118	69	677	677	Phosphoserine	1425	1795	4614	8190	TSenrich-100ughela-2	16223	4613	8189	TSenrich-100ughela-1	14802	IPI00005904	IPI00005904	IPI00005904	Component of gems 3;DEAD box protein 20;DEAD box protein DP 103;Gemin-3;Probable ATP-dependent RNA helicase DDX20;cDNA FLJ50269, highly similar to Probable ATP-dependent RNA helicase DDX20 (EC 3.6.1.-);DEAD (Asp-Glu-Ala-Asp) box polypeptide 20;DEAD-box corepressor DP103;Homo sapiens clone CDABP0082 mRNA sequence	DDX20;DP103;GEMIN3	Probable ATP-dependent RNA helicase DDX20	Q9UHI6;B4DWV7;Q8IYV2;Q8NEH0;Q8TDR3;Q9H4N4	0.999991	55.3432	0.999994	52.8206	1.94246e-24	186.45	0.999991	55.3432	1.49995e-12	158.16						2	S	KSYLEGSSDNQLK	NEK6	0.076	1.94246e-24	186.45	_SYLEGpSpSDNQLKDSESTPVDDR_	SYLEGS(1)S(1)DNQLKDSESTPVDDR	S(-55.68)Y(-62.75)LEGS(55.34)S(61.8)DNQLKDS(-57.12)ES(-55.34)T(-63.86)PVDDR	6	3	868.013
119	69	678	678	Phosphoserine	1425	1795	4614	8190	TSenrich-100ughela-2	16223	4613	8189	TSenrich-100ughela-1	14802	IPI00005904	IPI00005904	IPI00005904	Component of gems 3;DEAD box protein 20;DEAD box protein DP 103;Gemin-3;Probable ATP-dependent RNA helicase DDX20;cDNA FLJ50269, highly similar to Probable ATP-dependent RNA helicase DDX20 (EC 3.6.1.-);DEAD (Asp-Glu-Ala-Asp) box polypeptide 20;DEAD-box corepressor DP103;Homo sapiens clone CDABP0082 mRNA sequence	DDX20;DP103;GEMIN3	Probable ATP-dependent RNA helicase DDX20	Q9UHI6;B4DWV7;Q8IYV2;Q8NEH0;Q8TDR3;Q9H4N4	0.999998	61.8025	0.999999	62.886	1.94246e-24	186.45	0.999998	61.8025	1.49995e-12	158.16						2	S	SYLEGSSDNQLKD			1.94246e-24	186.45	_SYLEGpSpSDNQLKDSESTPVDDR_	SYLEGS(1)S(1)DNQLKDSESTPVDDR	S(-55.68)Y(-62.75)LEGS(55.34)S(61.8)DNQLKDS(-57.12)ES(-55.34)T(-63.86)PVDDR	7	3	868.013
120	70	612	612	Phosphoserine	962	1211;1212	3165	5870	TSenrich-100ughela-1	17872	3165	5870	TSenrich-100ughela-1	17872	IPI00006038;IPI00337397;IPI00216688;IPI00953181;IPI00337395;IPI00936708;IPI00337396	IPI00006038	IPI00006038	96 kDa nucleoporin;98 kDa nucleoporin;Nuclear pore complex protein Nup96;Nuclear pore complex protein Nup98;Nuclear pore complex protein Nup98-Nup96;Nucleoporin Nup96;Nucleoporin Nup98;cDNA FLJ77211, highly similar to Homo sapiens nucleoporin 98kDa (NUP98), transcript variant 3, mRNA;96 kDa nucleoporin;98 kDa nucleoporin;Nuclear pore complex protein Nup96;Nuclear pore complex protein Nup98;Nuclea…	ADAR2;NUP98;ADAR2;NUP98;ADAR2;NUP98;ADAR2;NUP98;ADAR2;NUP98;ADAR2;NUP98;NUP98	Isoform 1 of Nuclear pore complex protein Nup98-Nup96;Isoform 5 of Nuclear pore complex protein Nup98-Nup96;Isoform 2 of Nuclear pore complex protein Nup98-Nup96;Isoform 6 of Nuclear pore complex protein Nup98-Nup96;Isoform 3 of Nuclear pore complex protei	P52948-1;P52948;A8KA17;P52948-5;P52948-2;P52948-6;P52948-3;P52948-4;B4DWF8;Q9HDC8	0.99913	30.6027	0.99913	30.6027	1.36498e-06	117.97					1	36.7028	0.473182	36.703		1	S	NNSNLFSPVNRDS	CK1;Proline-directed	0.05	1.36498e-06	117.97	_NLNNSNLFpSPVNR_	NLNNS(0.001)NLFS(0.999)PVNR	NLNNS(-30.6)NLFS(30.6)PVNR	9	2	784.864
121	70	888	888	Phosphoserine	1697	2141	5456	9651	TSenrich-100ughela-3	12292	5455	9650	TSenrich-100ughela-3	12214	IPI00006038;IPI00337397;IPI00216688;IPI00953181;IPI00337395;IPI00936708;IPI00337396	IPI00006038	IPI00006038	96 kDa nucleoporin;98 kDa nucleoporin;Nuclear pore complex protein Nup96;Nuclear pore complex protein Nup98;Nuclear pore complex protein Nup98-Nup96;Nucleoporin Nup96;Nucleoporin Nup98;cDNA FLJ77211, highly similar to Homo sapiens nucleoporin 98kDa (NUP98), transcript variant 3, mRNA;96 kDa nucleoporin;98 kDa nucleoporin;Nuclear pore complex protein Nup96;Nuclear pore complex protein Nup98;Nuclea…	ADAR2;NUP98;ADAR2;NUP98;ADAR2;NUP98;ADAR2;NUP98;ADAR2;NUP98;ADAR2;NUP98;NUP98	Isoform 1 of Nuclear pore complex protein Nup98-Nup96;Isoform 5 of Nuclear pore complex protein Nup98-Nup96;Isoform 2 of Nuclear pore complex protein Nup98-Nup96;Isoform 6 of Nuclear pore complex protein Nup98-Nup96;Isoform 3 of Nuclear pore complex protei	P52948-1;P52948;A8KA17;P52948-5;P52948-2;P52948-6;P52948-3;P52948-4;B4DWF8;Q9HDC8	0.999998	57.8521									0.999998	57.8521	0.000348661	131.3		1	S	KYGLQDSDEEEEE	CK2;NEK6	0.076	0.000348661	131.3	_YGLQDpSDEEEEEHPSK_	YGLQDS(1)DEEEEEHPSK	Y(-57.85)GLQDS(57.85)DEEEEEHPS(-70.04)K	6	3	657.921
122	71	385	385	Phosphoserine	36;496	48;49;643	1610	2742	TSenrich-100ughela-2	29682	115	181	TSenrich-100ughela-2	21803	IPI00006079;IPI00413671;IPI00886854;IPI00886987;IPI00413672	IPI00006079	IPI00006079	Bcl-2-associated transcription factor 1;BCLAF1 protein;Bcl-2-associated transcription factor 1;Bcl-2-associated transcription factor 1	BCLAF1;BTF;KIAA0164;BCLAF1;BTF;KIAA0164;BCLAF1;BTF;KIAA0164	Isoform 1 of Bcl-2-associated transcription factor 1;Isoform 2 of Bcl-2-associated transcription factor 1;similar to BCL2-associated transcription factor 1 isoform 2;similar to BCL2-associated transcription factor 1;Isoform 3 of Bcl-2-associated transcript	Q9NYF8-1;Q9NYF8;Q6DCA8;Q9NYF8-2;Q9NYF8-3	0.979259	19.4784	0.830682	7.17278	0.000493834	111.29	0.979259	19.4784	4.44117e-11	154.08	0.503226	0.794255	0.0216502	89.841		1	S	EALDYFSDKESGK	CK2;GSK3	0.081	4.44117e-11	154.08	_GRAEGEWEDQEALDYFpSDKESGK_	GRAEGEWEDQEALDY(0.01)FS(0.979)DKES(0.011)GK	GRAEGEWEDQEALDY(-20.04)FS(19.48)DKES(-19.48)GK	17	3	909.38
123	71	512	512	Phosphoserine	226;844	292;1066	2826	5325	TSenrich-100ughela-2	34836	2825	5316	TSenrich-100ughela-1	28685	IPI00006079;IPI00413671;IPI00886854;IPI00886987;IPI00413672	IPI00006079	IPI00006079	Bcl-2-associated transcription factor 1;BCLAF1 protein;Bcl-2-associated transcription factor 1;Bcl-2-associated transcription factor 1	BCLAF1;BTF;KIAA0164;BCLAF1;BTF;KIAA0164;BCLAF1;BTF;KIAA0164	Isoform 1 of Bcl-2-associated transcription factor 1;Isoform 2 of Bcl-2-associated transcription factor 1;similar to BCL2-associated transcription factor 1 isoform 2;similar to BCL2-associated transcription factor 1;Isoform 3 of Bcl-2-associated transcript	Q9NYF8-1;Q9NYF8;Q6DCA8;Q9NYF8-2;Q9NYF8-3	0.861131	7.92464	0.999783	36.6345	4.16305e-19	168.3	0.861131	7.92464	8.38897e-05	87.323						1	S	KDLFDYSPPLHKN	Proline-directed	0.05	4.16305e-19	168.3	_LKDLFDYpSPPLHK_	LKDLFDY(0.139)S(0.861)PPLHK	LKDLFDY(-7.92)S(7.92)PPLHK	8	3	551.608
124	71	397	397	Phosphoserine	399;1044	519;1304	3359	6173	TSenrich-100ughela-3	13996	1289	2231	TSenrich-100ughela-3	12410	IPI00006079;IPI00413671;IPI00886854;IPI00886987;IPI00413672	IPI00006079	IPI00006079	Bcl-2-associated transcription factor 1;BCLAF1 protein;Bcl-2-associated transcription factor 1;Bcl-2-associated transcription factor 1	BCLAF1;BTF;KIAA0164;BCLAF1;BTF;KIAA0164;BCLAF1;BTF;KIAA0164	Isoform 1 of Bcl-2-associated transcription factor 1;Isoform 2 of Bcl-2-associated transcription factor 1;similar to BCL2-associated transcription factor 1 isoform 2;similar to BCL2-associated transcription factor 1;Isoform 3 of Bcl-2-associated transcript	Q9NYF8-1;Q9NYF8;Q6DCA8;Q9NYF8-2;Q9NYF8-3	0.999847	38.6508									0.999847	38.6508	1.07727e-25	188.12		1	S	KQKFNDSEGDDTE	CK2	0.117	1.07727e-25	188.12	_QKFNDpSEGDDTEETEDYR_	QKFNDS(1)EGDDTEETEDYR	QKFNDS(38.65)EGDDT(-38.65)EET(-47.86)EDY(-97.34)R	6	2	1129.42
125	71	660	660	Phosphoserine	610;1107	777;1377	3575	6570	TSenrich-100ughela-2	18565	1935	3362	TSenrich-100ughela-2	17696	IPI00006079;IPI00413671;IPI00886854;IPI00886987;IPI00413672;IPI00413673	IPI00006079	IPI00006079	Bcl-2-associated transcription factor 1;BCLAF1 protein;Bcl-2-associated transcription factor 1;Bcl-2-associated transcription factor 1;Bcl-2-associated transcription factor 1;cDNA, FLJ79533, highly similar to Bcl-2-associated transcription factor 1	BCLAF1;BTF;KIAA0164;BCLAF1;BTF;KIAA0164;BCLAF1;BTF;KIAA0164;BCLAF1;BTF;KIAA0164	Isoform 1 of Bcl-2-associated transcription factor 1;Isoform 2 of Bcl-2-associated transcription factor 1;similar to BCL2-associated transcription factor 1 isoform 2;similar to BCL2-associated transcription factor 1;Isoform 3 of Bcl-2-associated transcript	Q9NYF8-1;Q9NYF8;Q6DCA8;Q9NYF8-2;Q9NYF8-3;Q9NYF8-4;B0AZU3	0.530083	1.38015	0.0143415	-18.3622	5.09083e-12	133.49	0.530083	1.38015	5.09083e-12	133.49	0.00557453	-22.5105	0.000275242	109.04		1	S	RIDISPSTLRKHT			5.09083e-12	133.49	_RIDISPpSTLR_	RIDIS(0.386)PS(0.53)T(0.084)LR	RIDIS(-1.38)PS(1.38)T(-7.99)LR	7	2	619.319
126	72	595	595		107	144;145	350	563	TSenrich-100ughela-1	18150	347	560	TSenrich-100ughela-3	19492	IPI00915443;IPI00006122;IPI00402229;IPI00401163;IPI00515009;IPI00218139;IPI00915291;IPI00872345;IPI00915283;IPI00908361	IPI00915443	IPI00915443	cTAGE family member 5;Cutaneous T-cell lymphoma-associated antigen 5;Meningioma-expressed antigen 6/11;cTAGE family member 5;Cutaneous T-cell lymphoma-associated antigen 5;Meningioma-expressed antigen 6/11;cTAGE family member 5;Cutaneous T-cell lymphoma-associated antigen 5;Meningioma-expressed antigen 6/11;CTAGE family, member 5 isoform 1 variant;cTAGE family member 5;Cutaneous T-cell lymphoma-a…	CTAGE5;MEA11;MEA6;MGEA11;MGEA6;CTAGE5;MEA11;MEA6;MGEA11;MGEA6;CTAGE5;MEA11;MEA6;MGEA11;MGEA6;CTAGE5;MEA11;MEA6;MGEA11;MGEA6;CTAGE5;MEA11;MEA6;MGEA11;MGEA6;CTAGE5;MEA11;MEA6;MGEA11;MGEA6;CTAGE5;MEA11;MEA6;MGEA11;MGEA6;CTAGE5;MEA11;MEA6;MGEA11;MGEA6	Isoform 6 of Cutaneous T-cell lymphoma-associated antigen 5;Isoform MEA6 of Cutaneous T-cell lymphoma-associated antigen 5;cutaneous T-cell lymphoma-associated antigen 5 isoform 2;Isoform 5A of Cutaneous T-cell lymphoma-associated antigen 5;Isoform 5B of C	O15320-5;O15320;O15320-1;O15320-3;Q59FD2;O15320-4;O15320-2;Q05BM1;Q4G155;O15320-7;O15320-6;O15320-8;B4DQS6	0.874505	7.92489	0.874505	7.92489	0.250313	67.522	0.00474982	-20.5549	1.72743e-05	95.635	0.00157793	-28.0073	5.09327e-13	113.62		3	S	DPHRAPSDTGSLS	CAMK2;GSK3	0.042	5.09327e-13	113.62	_APpSDTGpSLpSPPWDQDR_	APS(0.875)DT(0.222)GS(0.918)LS(0.986)PPWDQDR	APS(7.92)DT(-7.92)GS(9.77)LS(17.37)PPWDQDR	3	2	984.844
127	72	599	599		107	144;145	350	563	TSenrich-100ughela-1	18150	347	560	TSenrich-100ughela-3	19492	IPI00915443;IPI00006122;IPI00402229;IPI00401163;IPI00515009;IPI00218139;IPI00915291;IPI00872345;IPI00915283;IPI00908361	IPI00915443	IPI00915443	cTAGE family member 5;Cutaneous T-cell lymphoma-associated antigen 5;Meningioma-expressed antigen 6/11;cTAGE family member 5;Cutaneous T-cell lymphoma-associated antigen 5;Meningioma-expressed antigen 6/11;cTAGE family member 5;Cutaneous T-cell lymphoma-associated antigen 5;Meningioma-expressed antigen 6/11;CTAGE family, member 5 isoform 1 variant;cTAGE family member 5;Cutaneous T-cell lymphoma-a…	CTAGE5;MEA11;MEA6;MGEA11;MGEA6;CTAGE5;MEA11;MEA6;MGEA11;MGEA6;CTAGE5;MEA11;MEA6;MGEA11;MGEA6;CTAGE5;MEA11;MEA6;MGEA11;MGEA6;CTAGE5;MEA11;MEA6;MGEA11;MGEA6;CTAGE5;MEA11;MEA6;MGEA11;MGEA6;CTAGE5;MEA11;MEA6;MGEA11;MGEA6;CTAGE5;MEA11;MEA6;MGEA11;MGEA6	Isoform 6 of Cutaneous T-cell lymphoma-associated antigen 5;Isoform MEA6 of Cutaneous T-cell lymphoma-associated antigen 5;cutaneous T-cell lymphoma-associated antigen 5 isoform 2;Isoform 5A of Cutaneous T-cell lymphoma-associated antigen 5;Isoform 5B of C	O15320-5;O15320;O15320-1;O15320-3;Q59FD2;O15320-4;O15320-2;Q05BM1;Q4G155;O15320-7;O15320-6;O15320-8;B4DQS6	0.918007	9.77338	0.918007	9.77338	0.250313	67.522	0.5	0	1.72743e-05	95.635	0.996714	27.6594	5.09327e-13	113.62		3	S	APSDTGSLSPPWD	CK1	0.143	5.09327e-13	113.62	_APpSDTGpSLpSPPWDQDR_	APS(0.875)DT(0.222)GS(0.918)LS(0.986)PPWDQDR	APS(7.92)DT(-7.92)GS(9.77)LS(17.37)PPWDQDR	7	2	984.844
128	72	601	601		107	144;145	350	563	TSenrich-100ughela-1	18150	347	560	TSenrich-100ughela-3	19492	IPI00915443;IPI00006122;IPI00402229;IPI00401163;IPI00515009;IPI00218139;IPI00915291;IPI00872345;IPI00915283;IPI00908361	IPI00915443	IPI00915443	cTAGE family member 5;Cutaneous T-cell lymphoma-associated antigen 5;Meningioma-expressed antigen 6/11;cTAGE family member 5;Cutaneous T-cell lymphoma-associated antigen 5;Meningioma-expressed antigen 6/11;cTAGE family member 5;Cutaneous T-cell lymphoma-associated antigen 5;Meningioma-expressed antigen 6/11;CTAGE family, member 5 isoform 1 variant;cTAGE family member 5;Cutaneous T-cell lymphoma-a…	CTAGE5;MEA11;MEA6;MGEA11;MGEA6;CTAGE5;MEA11;MEA6;MGEA11;MGEA6;CTAGE5;MEA11;MEA6;MGEA11;MGEA6;CTAGE5;MEA11;MEA6;MGEA11;MGEA6;CTAGE5;MEA11;MEA6;MGEA11;MGEA6;CTAGE5;MEA11;MEA6;MGEA11;MGEA6;CTAGE5;MEA11;MEA6;MGEA11;MGEA6;CTAGE5;MEA11;MEA6;MGEA11;MGEA6	Isoform 6 of Cutaneous T-cell lymphoma-associated antigen 5;Isoform MEA6 of Cutaneous T-cell lymphoma-associated antigen 5;cutaneous T-cell lymphoma-associated antigen 5 isoform 2;Isoform 5A of Cutaneous T-cell lymphoma-associated antigen 5;Isoform 5B of C	O15320-5;O15320;O15320-1;O15320-3;Q59FD2;O15320-4;O15320-2;Q05BM1;Q4G155;O15320-7;O15320-6;O15320-8;B4DQS6	0.985733	17.3678	0.985733	17.3678	0.250313	67.522	0.99525	20.5549	1.72743e-05	95.635	0.999998	59.808	5.09327e-13	113.62		3	S	SDTGSLSPPWDQD	CK1;F box bTrCP;Proline-directed	0.000624338	5.09327e-13	113.62	_APpSDTGpSLpSPPWDQDR_	APS(0.875)DT(0.222)GS(0.918)LS(0.986)PPWDQDR	APS(7.92)DT(-7.92)GS(9.77)LS(17.37)PPWDQDR	9	2	984.844
129	74	528	528	Phosphoserine	1685	2126	5423	9591	TSenrich-100ughela-2	22539	5421	9587	TSenrich-100ughela-3	22666	IPI00006181	IPI00006181	IPI00006181	eIF3 p66;eIF-3-zeta;Eukaryotic translation initiation factor 3 subunit 7;Eukaryotic translation initiation factor 3 subunit D;cDNA FLJ53917, highly similar to Eukaryotic translation initiation factor 3 subunit 7;cDNA FLJ51552, highly similar to Eukaryotic translation initiation factor 3 subunit 7;cDNA FLJ58383, highly similar to Eukaryotic translation initiation factor 3 subunit 7	EIF3D;EIF3S7	Eukaryotic translation initiation factor 3 subunit D	O15371;B4DTF8;B4DVY1;B4E1K8	0.886955	9.64777	0.62576	0	0.0305139	102.77	0.886955	9.64777	0.146343	91.516	0.102991	-13.1013	4.55764e-05	120.81		2	S	LPDGTFSSDEDEE	CK2	0.117	4.55764e-05	120.81	_VYSLPDGTFpSpSDEDEEEEEEEEEEEEEEET_	VY(0.015)S(0.015)LPDGT(0.129)FS(0.887)S(0.953)DEDEEEEEEEEEEEEEEET(0.002)	VY(-22.25)S(-21.97)LPDGT(-9.65)FS(9.65)S(14.26)DEDEEEEEEEEEEEEEEET(-29.93)	10	3	1243.43
130	74	529	529	Phosphoserine	1685	2126	5423	9591	TSenrich-100ughela-2	22539	5421	9587	TSenrich-100ughela-3	22666	IPI00006181	IPI00006181	IPI00006181	eIF3 p66;eIF-3-zeta;Eukaryotic translation initiation factor 3 subunit 7;Eukaryotic translation initiation factor 3 subunit D;cDNA FLJ53917, highly similar to Eukaryotic translation initiation factor 3 subunit 7;cDNA FLJ51552, highly similar to Eukaryotic translation initiation factor 3 subunit 7;cDNA FLJ58383, highly similar to Eukaryotic translation initiation factor 3 subunit 7	EIF3D;EIF3S7	Eukaryotic translation initiation factor 3 subunit D	O15371;B4DTF8;B4DVY1;B4E1K8	0.952798	14.262	0.62576	0	0.0305139	102.77	0.952798	14.262	0.146343	91.516	0.102991	-13.1013	4.55764e-05	120.81		2	S	PDGTFSSDEDEEE	CK2	0.117	4.55764e-05	120.81	_VYSLPDGTFpSpSDEDEEEEEEEEEEEEEEET_	VY(0.015)S(0.015)LPDGT(0.129)FS(0.887)S(0.953)DEDEEEEEEEEEEEEEEET(0.002)	VY(-22.25)S(-21.97)LPDGT(-9.65)FS(9.65)S(14.26)DEDEEEEEEEEEEEEEEET(-29.93)	11	3	1243.43
131	75	175	175		110	148	361	581	TSenrich-100ughela-2	17308	360	578	TSenrich-100ughela-1	16018	IPI00872028;IPI00292771;IPI00006196;IPI00030136	IPI00872028	IPI00872028	NUMA1 variant protein;Nuclear mitotic apparatus protein 1;SP-H antigen;Nuclear mitotic apparatus protein 1;SP-H antigen;cDNA FLJ76708, highly similar to Homo sapiens nuclear mitotic apparatus protein 1 (NUMA1), mRNA;NUMA1 protein;Nuclear mitotic apparatus protein 1 variant;Putative uncharacterized protein;Nuclear mitotic apparatus protein;NUMA1 protein;Nuclear mitotic apparatus protein 1, isoform…	NUMA1 variant protein;NUMA;NUMA1;NUMA;NUMA1;NuMA;hCG_2017131;NUMA1	NUMA1 variant protein (Fragment);Isoform 1 of Nuclear mitotic apparatus protein 1;Isoform 2 of Nuclear mitotic apparatus protein 1;Nuclear mitotic apparatus protein 1, isoform CRA_e	Q4LE64;Q14980-1;Q14980;Q14980-2;A8K394;Q3SYK8;Q59HB8;Q7Z757;Q96HN5;Q9UPG3;Q86XH4;Q9BTE9;Q9UNL7	0.997655	26.2991	0.999917	40.8164	6.99844e-33	193.28	0.997655	26.2991	4.94902e-06	121.35	0.999899	40.0115	4.84447e-12	147.87		1	S	TFPEELSPPSHQA	Proline-directed	0.05	6.99844e-33	193.28	_APVPSTCSSTFPEELpSPPSHQAK_	APVPSTCSSTFPEELS(0.998)PPS(0.002)HQAK	APVPS(-64.8)T(-64.8)CS(-57.98)S(-57.98)T(-57.98)FPEELS(26.3)PPS(-26.3)HQAK	16	3	845.38
132	75	1763	1763		1534	1933	4943	8761	TSenrich-100ughela-1	11085	4943	8761	TSenrich-100ughela-1	11085	IPI00872028;IPI00292771;IPI00006196;IPI00030136	IPI00872028	IPI00872028	NUMA1 variant protein;Nuclear mitotic apparatus protein 1;SP-H antigen;Nuclear mitotic apparatus protein 1;SP-H antigen;cDNA FLJ76708, highly similar to Homo sapiens nuclear mitotic apparatus protein 1 (NUMA1), mRNA;NUMA1 protein;Nuclear mitotic apparatus protein 1 variant;Putative uncharacterized protein;Nuclear mitotic apparatus protein;NUMA1 protein;Nuclear mitotic apparatus protein 1, isoform…	NUMA1 variant protein;NUMA;NUMA1;NUMA;NUMA1;NuMA;hCG_2017131;NUMA1	NUMA1 variant protein (Fragment);Isoform 1 of Nuclear mitotic apparatus protein 1;Isoform 2 of Nuclear mitotic apparatus protein 1;Nuclear mitotic apparatus protein 1, isoform CRA_e	Q4LE64;Q14980-1;Q14980;Q14980-2;A8K394;Q3SYK8;Q59HB8;Q7Z757;Q96HN5;Q9UPG3;Q86XH4;Q9BTE9;Q9UNL7	0.937719	11.7773	0.937719	11.7773	3.9952e-07	143.28										1	S	VPGEPASPISQRL	ERK/MAPK;Proline-directed;WW GroupIV	0.0023175	3.9952e-07	143.28	_TQPDGTSVPGEPApSPISQR_	TQPDGTSVPGEPAS(0.938)PIS(0.062)QR	T(-93.37)QPDGT(-57.97)S(-59.89)VPGEPAS(11.78)PIS(-11.78)QR	14	2	1002.46
133	76	735	735		177	230	582	1052	TSenrich-100ughela-2	16420	581	1050	TSenrich-100ughela-1	14947	IPI00785113;IPI00006207;IPI00382733	IPI00785113	IPI00785113	GC-binding factor 2;Leucine-rich repeat flightless-interacting protein 1;TAR RNA-interacting protein;GC-binding factor 2;Leucine-rich repeat flightless-interacting protein 1;TAR RNA-interacting protein;GC-binding factor 2;Leucine-rich repeat flightless-interacting protein 1;TAR RNA-interacting protein;LRRFIP1 protein	GCF2;LRRFIP1;TRIP;GCF2;LRRFIP1;TRIP;GCF2;LRRFIP1;TRIP	Isoform 1 of Leucine-rich repeat flightless-interacting protein 1;Isoform 2 of Leucine-rich repeat flightless-interacting protein 1;Isoform 3 of Leucine-rich repeat flightless-interacting protein 1	Q32MZ4-1;Q32MZ4;Q32MZ4-2;Q32MZ4-3;Q05D04	0.737664	4.49001	0.0123371	-19.0339	2.93381e-104	271.68	0.737664	4.49001	2.49131e-44	214.72						1	S	PEHESPSQDISDA	GSK3	0.081	2.93381e-104	271.68	_CTLPEHESPpSQDISDACEAESTER_	CTLPEHES(0.262)PS(0.738)QDISDACEAESTER	CT(-60.68)LPEHES(-4.49)PS(4.49)QDIS(-74.26)DACEAES(-154.06)T(-154.06)ER	10	3	943.372
134	77	158	158		1280;1281	1595;1596;1597	4105	7432	TSenrich-100ughela-2	14011	4104	7431	TSenrich-100ughela-3	11978	IPI00006211;IPI00216174;IPI00443658;IPI00910004	IPI00006211	IPI00006211	Vesicle-associated membrane protein-associated protein B/C;cDNA FLJ41544 fis, clone CERVX2002430, highly similar to Vesicle-associated membrane protein-associated protein B/C;cDNA FLJ13179 fis, clone NT2RP3003918, highly similar to Vesicle-associated membrane protein-associated protein B/C;VAMP (Vesicle-associated membrane protein)-associated protein B and C;VAMP (Vesicle-associated membrane prot…	UNQ484/PRO983;VAPB;hCG_26693;VAPB	Isoform 1 of Vesicle-associated membrane protein-associated protein B/C;Uncharacterized protein;cDNA FLJ46565 fis, clone THYMU3040816, moderately similar to Homo sapiens VAMP (vesicle-associated membrane protein)-associated protein B and C;cDNA FLJ59139, h	O95292-1;O95292;B3KVU7;Q53XM7;A6NLV9;Q6ZSP7;Q6ZR82;B4DNS4	0.871465	11.2045					0.871465	11.2045	0.57353	37.813	0.0273316	-18.3364	0.0112433	110.61		1	S	IVSKSLSSSLDDT	CHK1;CK1;PKD	0.020748	0.0112433	110.61	_SLpSSSLDDTEVKK_	S(0.041)LS(0.871)S(0.066)S(0.021)LDDT(0.001)EVKK	S(-13.26)LS(11.2)S(-11.2)S(-16.27)LDDT(-30.27)EVKK	3	2	744.845
135	78	542	542		679	855;856	2134	3721	TSenrich-100ughela-1	13850	2133	3719	TSenrich-100ughela-3	14543	IPI00006213;IPI00953308;IPI00795923	IPI00006213	IPI00006213	Pericentriolar material 1 protein;cDNA FLJ54972, highly similar to Homo sapiens pericentriolar material 1 (PCM1), mRNA;PCM1 protein;Pericentriolar material 1, isoform CRA_a;Putative uncharacterized protein PCM1;cDNA FLJ56445, highly similar to Homo sapiens pericentriolar material 1 (PCM1), mRNA;cDNA FLJ53611, highly similar to Homo sapiens pericentriolar material 1 (PCM1), mRNA;Pericentriolar mat…	PCM1;hCG_28254;PCM1;PCM1	Isoform 1 of Pericentriolar material 1 protein;Uncharacterized protein;Isoform 2 of Pericentriolar material 1 protein	Q15154-1;Q15154;B4DYD5;B9EIS5;D3DSQ0;A6NNN6;B4DJ00;B4DWY1;E5RGQ4;Q15154-2	0.548991	3.99051	0.548991	3.99051	0.640352	53.713					0.509195	0.180721	0.000521954	113.75		2	S	DSEHENSEPVTNI			0.000521954	113.75	_KDEETEESEYDSEHENpSEPVpTNIR_	KDEET(0.118)EES(0.122)EY(0.238)DS(0.077)EHENS(0.549)EPVT(0.896)NIR	KDEET(-8.41)EES(-8.41)EY(-3.99)DS(-10.91)EHENS(3.99)EPVT(15.17)NIR	17	3	1009.39
136	78	1765	1765	Phosphoserine	999	1252	3242	5991	TSenrich-100ughela-2	18744	3241	5988	TSenrich-100ughela-3	18654	IPI00006213;IPI00953308;IPI00795923;IPI00941597	IPI00006213	IPI00006213	Pericentriolar material 1 protein;cDNA FLJ54972, highly similar to Homo sapiens pericentriolar material 1 (PCM1), mRNA;PCM1 protein;Pericentriolar material 1, isoform CRA_a;Putative uncharacterized protein PCM1;cDNA FLJ56445, highly similar to Homo sapiens pericentriolar material 1 (PCM1), mRNA;cDNA FLJ53611, highly similar to Homo sapiens pericentriolar material 1 (PCM1), mRNA;Pericentriolar mat…	PCM1;hCG_28254;PCM1;PCM1;PCM1	Isoform 1 of Pericentriolar material 1 protein;Uncharacterized protein;Isoform 2 of Pericentriolar material 1 protein;PCM1 protein	Q15154-1;Q15154;B4DYD5;B9EIS5;D3DSQ0;A6NNN6;B4DJ00;B4DWY1;E5RGQ4;Q15154-2;A2RUU9;C9JGS5	0.999189	30.8656					0.999189	30.8656	0.266471	81.245	1	81.7827	0.000942232	113.6		3	S	GPKNVRSDISDQE			0.000942232	113.6	_NVRpSDIpSDQEEDEEpSEGCPVSINLSK_	NVRS(0.999)DIS(0.992)DQEEDEES(0.997)EGCPVS(0.012)INLSK	NVRS(30.87)DIS(20.89)DQEEDEES(25.76)EGCPVS(-20.89)INLS(-51.55)K	4	3	1059.41
137	78	1768	1768	Phosphoserine	999	1252	3242	5991	TSenrich-100ughela-2	18744	3241	5988	TSenrich-100ughela-3	18654	IPI00006213;IPI00953308;IPI00795923;IPI00941597	IPI00006213	IPI00006213	Pericentriolar material 1 protein;cDNA FLJ54972, highly similar to Homo sapiens pericentriolar material 1 (PCM1), mRNA;PCM1 protein;Pericentriolar material 1, isoform CRA_a;Putative uncharacterized protein PCM1;cDNA FLJ56445, highly similar to Homo sapiens pericentriolar material 1 (PCM1), mRNA;cDNA FLJ53611, highly similar to Homo sapiens pericentriolar material 1 (PCM1), mRNA;Pericentriolar mat…	PCM1;hCG_28254;PCM1;PCM1;PCM1	Isoform 1 of Pericentriolar material 1 protein;Uncharacterized protein;Isoform 2 of Pericentriolar material 1 protein;PCM1 protein	Q15154-1;Q15154;B4DYD5;B9EIS5;D3DSQ0;A6NNN6;B4DJ00;B4DWY1;E5RGQ4;Q15154-2;A2RUU9;C9JGS5	0.991931	20.8852					0.991931	20.8852	0.266471	81.245	1	67.2959	0.000942232	113.6		3	S	NVRSDISDQEEDE	CK1;CK2	0.081	0.000942232	113.6	_NVRpSDIpSDQEEDEEpSEGCPVSINLSK_	NVRS(0.999)DIS(0.992)DQEEDEES(0.997)EGCPVS(0.012)INLSK	NVRS(30.87)DIS(20.89)DQEEDEES(25.76)EGCPVS(-20.89)INLS(-51.55)K	7	3	1059.41
138	78	1776	1776	Phosphoserine	999	1252	3242	5991	TSenrich-100ughela-2	18744	3241	5988	TSenrich-100ughela-3	18654	IPI00006213;IPI00953308;IPI00795923;IPI00941597	IPI00006213	IPI00006213	Pericentriolar material 1 protein;cDNA FLJ54972, highly similar to Homo sapiens pericentriolar material 1 (PCM1), mRNA;PCM1 protein;Pericentriolar material 1, isoform CRA_a;Putative uncharacterized protein PCM1;cDNA FLJ56445, highly similar to Homo sapiens pericentriolar material 1 (PCM1), mRNA;cDNA FLJ53611, highly similar to Homo sapiens pericentriolar material 1 (PCM1), mRNA;Pericentriolar mat…	PCM1;hCG_28254;PCM1;PCM1;PCM1	Isoform 1 of Pericentriolar material 1 protein;Uncharacterized protein;Isoform 2 of Pericentriolar material 1 protein;PCM1 protein	Q15154-1;Q15154;B4DYD5;B9EIS5;D3DSQ0;A6NNN6;B4DJ00;B4DWY1;E5RGQ4;Q15154-2;A2RUU9;C9JGS5	0.997365	25.7579					0.997365	25.7579	0.266471	81.245	0.999943	42.4757	0.000942232	113.6		3	S	QEEDEESEGCPVS			0.000942232	113.6	_NVRpSDIpSDQEEDEEpSEGCPVSINLSK_	NVRS(0.999)DIS(0.992)DQEEDEES(0.997)EGCPVS(0.012)INLSK	NVRS(30.87)DIS(20.89)DQEEDEES(25.76)EGCPVS(-20.89)INLS(-51.55)K	15	3	1059.41
139	78	1257	1257	Phosphoserine	1030;1133	1290;1410	3659	6715	TSenrich-100ughela-2	23157	3658	6714	TSenrich-100ughela-1	21760	IPI00006213;IPI00953308;IPI00795923;IPI00941597	IPI00006213	IPI00006213	Pericentriolar material 1 protein;cDNA FLJ54972, highly similar to Homo sapiens pericentriolar material 1 (PCM1), mRNA;PCM1 protein;Pericentriolar material 1, isoform CRA_a;Putative uncharacterized protein PCM1;cDNA FLJ56445, highly similar to Homo sapiens pericentriolar material 1 (PCM1), mRNA;cDNA FLJ53611, highly similar to Homo sapiens pericentriolar material 1 (PCM1), mRNA;Pericentriolar mat…	PCM1;hCG_28254;PCM1;PCM1;PCM1	Isoform 1 of Pericentriolar material 1 protein;Uncharacterized protein;Isoform 2 of Pericentriolar material 1 protein;PCM1 protein	Q15154-1;Q15154;B4DYD5;B9EIS5;D3DSQ0;A6NNN6;B4DJ00;B4DWY1;E5RGQ4;Q15154-2;A2RUU9;C9JGS5	0.980822	14.0726	0.985951	18.261	0.00110111	110.84	0.980822	14.0726	0.011097	100.56						3	S	RQFDEESLESFSS	PLK1	0.033462	0.00110111	110.84	_RQFDEEpSLESFpSpSMPDPVDPTTVTK_	RQFDEES(0.981)LES(0.51)FS(0.662)S(0.847)MPDPVDPTTVTK	RQFDEES(14.07)LES(-1.61)FS(1.61)S(5.05)MPDPVDPT(-69.45)T(-69.21)VT(-72.3)K	7	3	1028.07
140	78	1262	1262	Phosphoserine	1030;1133	1290;1410	3659	6715	TSenrich-100ughela-2	23157	3658	6714	TSenrich-100ughela-1	21760	IPI00006213;IPI00953308;IPI00795923;IPI00941597	IPI00006213	IPI00006213	Pericentriolar material 1 protein;cDNA FLJ54972, highly similar to Homo sapiens pericentriolar material 1 (PCM1), mRNA;PCM1 protein;Pericentriolar material 1, isoform CRA_a;Putative uncharacterized protein PCM1;cDNA FLJ56445, highly similar to Homo sapiens pericentriolar material 1 (PCM1), mRNA;cDNA FLJ53611, highly similar to Homo sapiens pericentriolar material 1 (PCM1), mRNA;Pericentriolar mat…	PCM1;hCG_28254;PCM1;PCM1;PCM1	Isoform 1 of Pericentriolar material 1 protein;Uncharacterized protein;Isoform 2 of Pericentriolar material 1 protein;PCM1 protein	Q15154-1;Q15154;B4DYD5;B9EIS5;D3DSQ0;A6NNN6;B4DJ00;B4DWY1;E5RGQ4;Q15154-2;A2RUU9;C9JGS5	0.662012	1.61153	0.0587011	-14.4141	0.00110111	110.84	0.662012	1.61153	0.011097	100.56						3	S	ESLESFSSMPDPV			0.00110111	110.84	_RQFDEEpSLESFpSpSMPDPVDPTTVTK_	RQFDEES(0.981)LES(0.51)FS(0.662)S(0.847)MPDPVDPTTVTK	RQFDEES(14.07)LES(-1.61)FS(1.61)S(5.05)MPDPVDPT(-69.45)T(-69.21)VT(-72.3)K	12	3	1028.07
141	78	1263	1263		1030;1133	1290;1410	3659	6715	TSenrich-100ughela-2	23157	3658	6714	TSenrich-100ughela-1	21760	IPI00006213;IPI00953308;IPI00795923;IPI00941597	IPI00006213	IPI00006213	Pericentriolar material 1 protein;cDNA FLJ54972, highly similar to Homo sapiens pericentriolar material 1 (PCM1), mRNA;PCM1 protein;Pericentriolar material 1, isoform CRA_a;Putative uncharacterized protein PCM1;cDNA FLJ56445, highly similar to Homo sapiens pericentriolar material 1 (PCM1), mRNA;cDNA FLJ53611, highly similar to Homo sapiens pericentriolar material 1 (PCM1), mRNA;Pericentriolar mat…	PCM1;hCG_28254;PCM1;PCM1;PCM1	Isoform 1 of Pericentriolar material 1 protein;Uncharacterized protein;Isoform 2 of Pericentriolar material 1 protein;PCM1 protein	Q15154-1;Q15154;B4DYD5;B9EIS5;D3DSQ0;A6NNN6;B4DJ00;B4DWY1;E5RGQ4;Q15154-2;A2RUU9;C9JGS5	0.847004	5.05375	0.989413	19.4896	0.00110111	110.84	0.847004	5.05375	0.011097	100.56						3	S	SLESFSSMPDPVD	CK1;CK2	0.081	0.00110111	110.84	_RQFDEEpSLESFpSpSMPDPVDPTTVTK_	RQFDEES(0.981)LES(0.51)FS(0.662)S(0.847)MPDPVDPTTVTK	RQFDEES(14.07)LES(-1.61)FS(1.61)S(5.05)MPDPVDPT(-69.45)T(-69.21)VT(-72.3)K	13	3	1028.07
142	79	254	254	Phosphoserine	1177	1463;1464	3798	6969	TSenrich-100ughela-2	19841	3798	6969	TSenrich-100ughela-2	19841	IPI00006298;IPI00917908;IPI00409624	IPI00006298	IPI00006298	CASP10;Clk-associating RS-cyclophilin;Cyclophilin G;Peptidyl-prolyl cis-trans isomerase G;Rotamase G;PPIG protein;Peptidyl-prolyl cis-trans isomerase;PPIG protein;CASP10;Clk-associating RS-cyclophilin;Cyclophilin G;Peptidyl-prolyl cis-trans isomerase G;Rotamase G	PPIG;PPIG;PPIG	Isoform 1 of Peptidyl-prolyl cis-trans isomerase G;PPIG protein;Isoform 2 of Peptidyl-prolyl cis-trans isomerase G	Q13427-1;Q13427;Q32LZ0;Q6GMS9;Q6P432;Q2NKQ6;Q13427-2	0.929744	7.86526	0.994988	26.0479	0.67217	67.507	0.929744	7.86526	6.18677e-05	126.79						3	S	RKKSKKSASSESE	CK1	0.081	6.18677e-05	126.79	_pSApSSEpSEAENLEAQPQSTVRPEEIPPIPENR_	S(0.93)AS(0.57)S(0.57)ES(0.93)EAENLEAQPQSTVRPEEIPPIPENR	S(7.87)AS(0)S(0)ES(7.87)EAENLEAQPQS(-73.95)T(-80.16)VRPEEIPPIPENR	1	3	1211.18
143	79	256	256	Phosphoserine	1177	1463;1464	3798	6969	TSenrich-100ughela-2	19841	3798	6969	TSenrich-100ughela-2	19841	IPI00006298;IPI00917908;IPI00409624	IPI00006298	IPI00006298	CASP10;Clk-associating RS-cyclophilin;Cyclophilin G;Peptidyl-prolyl cis-trans isomerase G;Rotamase G;PPIG protein;Peptidyl-prolyl cis-trans isomerase;PPIG protein;CASP10;Clk-associating RS-cyclophilin;Cyclophilin G;Peptidyl-prolyl cis-trans isomerase G;Rotamase G	PPIG;PPIG;PPIG	Isoform 1 of Peptidyl-prolyl cis-trans isomerase G;PPIG protein;Isoform 2 of Peptidyl-prolyl cis-trans isomerase G	Q13427-1;Q13427;Q32LZ0;Q6GMS9;Q6P432;Q2NKQ6;Q13427-2	0.570256	0	0.994988	26.0479	0.67217	67.507	0.570256	0	6.18677e-05	126.79						3	S	KSKKSASSESEAE			6.18677e-05	126.79	_pSApSSEpSEAENLEAQPQSTVRPEEIPPIPENR_	S(0.93)AS(0.57)S(0.57)ES(0.93)EAENLEAQPQSTVRPEEIPPIPENR	S(7.87)AS(0)S(0)ES(7.87)EAENLEAQPQS(-73.95)T(-80.16)VRPEEIPPIPENR	3	3	1211.18
144	79	257	257	Phosphoserine	1177	1463;1464	3798	6969	TSenrich-100ughela-2	19841	3798	6969	TSenrich-100ughela-2	19841	IPI00006298;IPI00917908;IPI00409624	IPI00006298	IPI00006298	CASP10;Clk-associating RS-cyclophilin;Cyclophilin G;Peptidyl-prolyl cis-trans isomerase G;Rotamase G;PPIG protein;Peptidyl-prolyl cis-trans isomerase;PPIG protein;CASP10;Clk-associating RS-cyclophilin;Cyclophilin G;Peptidyl-prolyl cis-trans isomerase G;Rotamase G	PPIG;PPIG;PPIG	Isoform 1 of Peptidyl-prolyl cis-trans isomerase G;PPIG protein;Isoform 2 of Peptidyl-prolyl cis-trans isomerase G	Q13427-1;Q13427;Q32LZ0;Q6GMS9;Q6P432;Q2NKQ6;Q13427-2	0.570256	0	0.995176	26.2853	0.67217	67.507	0.570256	0	6.18677e-05	126.79						3	S	SKKSASSESEAEN	CK1;CK2	0.081	6.18677e-05	126.79	_pSApSSEpSEAENLEAQPQSTVRPEEIPPIPENR_	S(0.93)AS(0.57)S(0.57)ES(0.93)EAENLEAQPQSTVRPEEIPPIPENR	S(7.87)AS(0)S(0)ES(7.87)EAENLEAQPQS(-73.95)T(-80.16)VRPEEIPPIPENR	4	3	1211.18
145	79	259	259	Phosphoserine	1177	1463;1464	3798	6969	TSenrich-100ughela-2	19841	3798	6969	TSenrich-100ughela-2	19841	IPI00006298;IPI00917908;IPI00409624	IPI00006298	IPI00006298	CASP10;Clk-associating RS-cyclophilin;Cyclophilin G;Peptidyl-prolyl cis-trans isomerase G;Rotamase G;PPIG protein;Peptidyl-prolyl cis-trans isomerase;PPIG protein;CASP10;Clk-associating RS-cyclophilin;Cyclophilin G;Peptidyl-prolyl cis-trans isomerase G;Rotamase G	PPIG;PPIG;PPIG	Isoform 1 of Peptidyl-prolyl cis-trans isomerase G;PPIG protein;Isoform 2 of Peptidyl-prolyl cis-trans isomerase G	Q13427-1;Q13427;Q32LZ0;Q6GMS9;Q6P432;Q2NKQ6;Q13427-2	0.929744	7.86526	0.995176	26.2853	0.67217	67.507	0.929744	7.86526	6.18677e-05	126.79						3	S	KSASSESEAENLE	CK1;CK2	0.081	6.18677e-05	126.79	_pSApSSEpSEAENLEAQPQSTVRPEEIPPIPENR_	S(0.93)AS(0.57)S(0.57)ES(0.93)EAENLEAQPQSTVRPEEIPPIPENR	S(7.87)AS(0)S(0)ES(7.87)EAENLEAQPQS(-73.95)T(-80.16)VRPEEIPPIPENR	6	3	1211.18
146	80	502	502	Phosphoserine	285;286;557;558	378;379;720;721;722	1804	3069	TSenrich-100ughela-1	19651	937	1643	TSenrich-100ughela-2	16362	IPI00006379	IPI00006379	IPI00006379	Nucleolar protein 5;Nucleolar protein 58;cDNA FLJ13913 fis, clone Y79AA1000231, highly similar to Nucleolar protein NOP5;cDNA FLJ56668, highly similar to Nucleolar protein NOP5	HSPC120;NOL5;NOP5;NOP58	Nucleolar protein 58	Q9Y2X3;B3KN82;B4DUY3	0.999622	38.0141	0.999622	38.0141	1.22086e-44	215.89	0.999984	49.0549	5.21264e-57	228.14	0.999934	43.1218	8.17704e-17	172.7		2	S	IKEEPLSEEEPCT	CK2	0.117	5.21264e-57	228.14	_HIKEEPLpSEEEPCTSTAIApSPEKK_	HIKEEPLS(1)EEEPCT(0.047)S(0.047)T(0.047)AIAS(0.859)PEKK	HIKEEPLS(38.01)EEEPCT(-12.61)S(-12.61)T(-12.61)AIAS(12.61)PEKK	8	3	957.424
147	80	514	514	Phosphoserine	285;286;557;558	378;379;720;721;722	1804	3069	TSenrich-100ughela-1	19651	937	1643	TSenrich-100ughela-2	16362	IPI00006379	IPI00006379	IPI00006379	Nucleolar protein 5;Nucleolar protein 58;cDNA FLJ13913 fis, clone Y79AA1000231, highly similar to Nucleolar protein NOP5;cDNA FLJ56668, highly similar to Nucleolar protein NOP5	HSPC120;NOL5;NOP5;NOP58	Nucleolar protein 58	Q9Y2X3;B3KN82;B4DUY3	0.858788	12.6097	0.858788	12.6097	1.22086e-44	215.89	1.57883e-09	-88.0166	5.21264e-57	228.14	0.99966	35.7627	8.17704e-17	172.7		2	S	TSTAIASPEKKKK	CDK1;CDK2;CK1;Proline-directed	0.0057	5.21264e-57	228.14	_HIKEEPLpSEEEPCTSTAIApSPEKK_	HIKEEPLS(1)EEEPCT(0.047)S(0.047)T(0.047)AIAS(0.859)PEKK	HIKEEPLS(38.01)EEEPCT(-12.61)S(-12.61)T(-12.61)AIAS(12.61)PEKK	20	3	957.424
148	82	178	178	Phosphoserine	901;902	1133;1134;1135;1136	2998	5588	TSenrich-100ughela-3	18203	2997	5587	TSenrich-100ughela-2	16812	IPI00006586;IPI00878774;IPI00910152;IPI00878500;IPI00879111	IPI00006586	IPI00006586	Epidermal Langerhans cell protein LCP1;TOX high mobility group box family member 4;cDNA FLJ54372, highly similar to Epidermal Langerhans cell protein LCP1;cDNA FLJ54382, highly similar to Epidermal Langerhans cell protein LCP1;cDNA FLJ54357, highly similar to Epidermal Langerhans cell protein LCP1;Putative uncharacterized protein TOX4;Putative uncharacterized protein TOX4	C14orf92;KIAA0737;TOX4;TOX4;TOX4	TOX high mobility group box family member 4;cDNA FLJ54382, highly similar to Epidermal Langerhans cell protein LCP1;cDNA FLJ54357, highly similar to Epidermal Langerhans cell protein LCP1;Uncharacterized protein;Uncharacterized protein	O94842;B4DPY8;B4DSM0;B4DJ39;C9JNL1;C9J919	0.996222	27.5338	0.972378	16.7707	7.2391e-05	119.86	0.917863	10.6266	1.62968e-11	158.46	0.996222	27.5338	0.000190251	116.82		2	S	RLSTTPSPTSSLH	CK1;GSK3;Proline-directed	0.05	1.62968e-11	158.46	_LSTTPpSPpTSSLHEDGVEDFRR_	LSTT(0.002)PS(0.996)PT(0.334)S(0.334)S(0.334)LHEDGVEDFRR	LS(-44.73)T(-36.38)T(-27.53)PS(27.53)PT(0)S(0)S(0)LHEDGVEDFRR	6	3	831.023
149	82	181	181	Phosphoserine	901;902	1133;1134;1135;1136	2998	5588	TSenrich-100ughela-3	18203	2997	5587	TSenrich-100ughela-2	16812	IPI00006586;IPI00878774;IPI00910152;IPI00878500;IPI00879111	IPI00006586	IPI00006586	Epidermal Langerhans cell protein LCP1;TOX high mobility group box family member 4;cDNA FLJ54372, highly similar to Epidermal Langerhans cell protein LCP1;cDNA FLJ54382, highly similar to Epidermal Langerhans cell protein LCP1;cDNA FLJ54357, highly similar to Epidermal Langerhans cell protein LCP1;Putative uncharacterized protein TOX4;Putative uncharacterized protein TOX4	C14orf92;KIAA0737;TOX4;TOX4;TOX4	TOX high mobility group box family member 4;cDNA FLJ54382, highly similar to Epidermal Langerhans cell protein LCP1;cDNA FLJ54357, highly similar to Epidermal Langerhans cell protein LCP1;Uncharacterized protein;Uncharacterized protein	O94842;B4DPY8;B4DSM0;B4DJ39;C9JNL1;C9J919	0.333918	0	0.506292	0.945877	7.2391e-05	119.86	0.528609	1.19183	1.62968e-11	158.46	0.333918	0	0.000190251	116.82		2	S	TTPSPTSSLHEDG	CK1	0.081	1.62968e-11	158.46	_LSTTPpSPpTSSLHEDGVEDFRR_	LSTT(0.002)PS(0.996)PT(0.334)S(0.334)S(0.334)LHEDGVEDFRR	LS(-44.73)T(-36.38)T(-27.53)PS(27.53)PT(0)S(0)S(0)LHEDGVEDFRR	9	3	831.023
150	82	182	182	Phosphoserine	901;902	1133;1134;1135;1136	2998	5588	TSenrich-100ughela-3	18203	2997	5587	TSenrich-100ughela-2	16812	IPI00006586;IPI00878774;IPI00910152;IPI00878500;IPI00879111	IPI00006586	IPI00006586	Epidermal Langerhans cell protein LCP1;TOX high mobility group box family member 4;cDNA FLJ54372, highly similar to Epidermal Langerhans cell protein LCP1;cDNA FLJ54382, highly similar to Epidermal Langerhans cell protein LCP1;cDNA FLJ54357, highly similar to Epidermal Langerhans cell protein LCP1;Putative uncharacterized protein TOX4;Putative uncharacterized protein TOX4	C14orf92;KIAA0737;TOX4;TOX4;TOX4	TOX high mobility group box family member 4;cDNA FLJ54382, highly similar to Epidermal Langerhans cell protein LCP1;cDNA FLJ54357, highly similar to Epidermal Langerhans cell protein LCP1;Uncharacterized protein;Uncharacterized protein	O94842;B4DPY8;B4DSM0;B4DJ39;C9JNL1;C9J919	0.333918	0	0.409432	-0.945877	7.2391e-05	119.86	0.404181	-1.19183	1.62968e-11	158.46	0.333918	0	0.000190251	116.82		2	S	TPSPTSSLHEDGV	CK1;CK2	0.117	1.62968e-11	158.46	_LSTTPpSPpTSSLHEDGVEDFRR_	LSTT(0.002)PS(0.996)PT(0.334)S(0.334)S(0.334)LHEDGVEDFRR	LS(-44.73)T(-36.38)T(-27.53)PS(27.53)PT(0)S(0)S(0)LHEDGVEDFRR	10	3	831.023
151	84	365	365	Phosphoserine	1546;1547	1950;1951;1952;1953	5000	8860	TSenrich-100ughela-2	15606	4988	8845	TSenrich-100ughela-3	17663	IPI00006900	IPI00006900	IPI00006900	Charged amino acid-rich leucine zipper 1;Disrupter of silencing SAS10;Something about silencing protein 10;UTP3 homolog	CRLZ1;SAS10;UTP3	Something about silencing protein 10	Q9NQZ2	1	68.8909	0.994544	22.6322	2.20421e-44	214.88	1	68.8909	2.89772e-149	298.48	0.999997	55.7723	7.19196e-259	355.76		3	S	CAVTDLSDDSDFD			7.19196e-259	355.76	_TSAAACAVpTDLpSDDpSDFDEKAK_	TSAAACAVT(1)DLS(1)DDS(1)DFDEKAK	T(-45.68)S(-45.36)AAACAVT(45.36)DLS(68.89)DDS(75.12)DFDEKAK	12	3	852.976
152	84	368	368	Phosphoserine	1546;1547	1950;1951;1952;1953	5000	8860	TSenrich-100ughela-2	15606	4988	8845	TSenrich-100ughela-3	17663	IPI00006900	IPI00006900	IPI00006900	Charged amino acid-rich leucine zipper 1;Disrupter of silencing SAS10;Something about silencing protein 10;UTP3 homolog	CRLZ1;SAS10;UTP3	Something about silencing protein 10	Q9NQZ2	1	75.1181	0.999189	30.96	2.20421e-44	214.88	1	75.1181	2.89772e-149	298.48	1	99.4166	7.19196e-259	355.76		3	S	TDLSDDSDFDEKA	CK1;CK2	0.081	7.19196e-259	355.76	_TSAAACAVpTDLpSDDpSDFDEKAK_	TSAAACAVT(1)DLS(1)DDS(1)DFDEKAK	T(-45.68)S(-45.36)AAACAVT(45.36)DLS(68.89)DDS(75.12)DFDEKAK	15	3	852.976
153	85	266	266	Phosphoserine	1120	1392	3606	6627	TSenrich-100ughela-2	17477	3605	6625	TSenrich-100ughela-1	17201	IPI00006937	IPI00006937	IPI00006937	Non-canonical ubiquitin-conjugating enzyme 1;Ubiquitin-conjugating enzyme E2 J1;Yeast ubiquitin-conjugating enzyme UBC6 homolog E;cDNA FLJ52165, highly similar to Ubiquitin-conjugating enzyme E2 J1 (EC 6.3.2.19);Ubiquitin-conjugating enzyme E2, J1 (UBC6 homolog, yeast), isoform CRA_a;Ubiquitin-conjugating enzyme E2, J1 variant	CGI-76;HSPC153;HSPC205;NCUBE1;UBE2J1;hCG_33069	Ubiquitin-conjugating enzyme E2 J1	Q9Y385;B4DUF8;Q53F25	0.972814	16.2156	0.989906	20.5631	4.77703e-06	133.03	0.972814	16.2156	0.0321345	103.7						1	S	QSQRRLSTSPDVI	CAMK2;PKA;PKA/AKT	0.00111111	4.77703e-06	133.03	_RLpSTSPDVIQGHQPR_	RLS(0.973)T(0.023)S(0.004)PDVIQGHQPR	RLS(16.22)T(-16.22)S(-23.93)PDVIQGHQPR	3	3	590.96
154	86	295	295	Phosphoserine	1304	1625	4162	7529	TSenrich-100ughela-2	23576	4162	7529	TSenrich-100ughela-2	23576	IPI00006987;IPI00923556;IPI00911118	IPI00006987	IPI00006987	ATP-dependent RNA helicase DDX24;DEAD box protein 24;cDNA FLJ50574, highly similar to ATP-dependent RNA helicase DDX24 (EC 3.6.1.-);DEAD (Asp-Glu-Ala-Asp) box polypeptide 24 variant;DDX24 protein;cDNA FLJ54363, highly similar to ATP-dependent RNA helicase DDX24 (EC 3.6.1.-);cDNA FLJ52397, highly similar to ATP-dependent RNA helicase DDX24 (EC 3.6.1.-);ATP-dependent RNA helicase	DDX24;DDX24	ATP-dependent RNA helicase DDX24;DDX24 protein;cDNA FLJ54363, highly similar to ATP-dependent RNA helicase DDX24	Q9GZR7;B4DM03;Q59FS7;Q4V9L5;B4DKV2;B4E300;Q7Z4W0;Q7Z4X3	0.781814	7.05772	0.00972507	-20.0731	0.471867	87.657	0.781814	7.05772	0.0151465	109.93						1	S	GKAEAESDALPDD			0.0151465	109.93	_SPGKAEAEpSDALPDDTVIESEALPSDIAAEAR_	S(0.055)PGKAEAES(0.782)DALPDDT(0.154)VIES(0.009)EALPSDIAAEAR	S(-11.51)PGKAEAES(7.06)DALPDDT(-7.06)VIES(-19.38)EALPS(-47.76)DIAAEAR	9	3	1112.18
155	88	355	355	Phosphoserine	1670	2107	5373	9498	TSenrich-100ughela-2	19189	5372	9497	TSenrich-100ughela-3	19387	IPI00007273;IPI00873559	IPI00007273	IPI00007273	Zinc finger and BTB domain-containing protein 1;L2	KIAA0997;ZBTB1	Zinc finger and BTB domain-containing protein 1;zinc finger and BTB domain-containing protein 1 isoform 2	Q9Y2K1;Q5UW39	0.825304	5.71035					0.825304	5.71035	0.000521191	115.09	0.989074	19.5194	5.73758e-07	131.18		2	S	DKDCNESTDNDEL			5.73758e-07	131.18	_VTDKDCNEpSpTDNDELEDEPEEPFYR_	VT(0.349)DKDCNES(0.825)T(0.825)DNDELEDEPEEPFYR	VT(-5.71)DKDCNES(5.71)T(5.71)DNDELEDEPEEPFY(-88.63)R	9	3	1069.39
156	89	328	328	Phosphoserine	1099	1366	3540	6528	TSenrich-100ughela-2	22002	3537	6525	TSenrich-100ughela-1	20245	IPI00007277;IPI00910490;IPI00789379;IPI00015103;IPI00925387	IPI00007277	IPI00007277	Leucine-rich repeat flightless-interacting protein 2;cDNA FLJ58304, moderately similar to Leucine-rich repeat flightless-interacting protein 2;Putative uncharacterized protein LRRFIP2;cDNA FLJ75479;Leucine-rich repeat flightless-interacting protein 2;Putative uncharacterized protein LRRFIP2	LRRFIP2;LRRFIP2;LRRFIP2;LRRFIP2	Isoform 1 of Leucine-rich repeat flightless-interacting protein 2;cDNA FLJ58304, moderately similar to Leucine-rich repeat flightless-interacting protein 2;leucine-rich repeat flightless-interacting protein 2 isoform 3;Isoform 2 of Leucine-rich repeat flig	Q9Y608-1;Q9Y608;A8MXR0;A8K649;Q9Y608-2;C9JSU1	0.944968	16.1799	0.814712	6.86952	4.88319e-16	161.1	0.944968	16.1799	7.80047e-07	135.72	0.977082	17.7882	3.4297e-07	142		1	S	NSSRRGSGDTSSL	CAMK2;CK1;GSK3;PKA	0.004788	4.88319e-16	161.1	_RGpSGDTSSLIDPDTSLSELR_	RGS(0.945)GDT(0.014)S(0.018)S(0.023)LIDPDTSLSELR	RGS(16.18)GDT(-18.21)S(-17.2)S(-16.18)LIDPDT(-74.86)S(-73.57)LS(-89.38)ELR	3	2	1093.5
157	90	43	43	Phosphoserine	1124	1396	3620	6650	TSenrich-100ughela-3	13127	3620	6650	TSenrich-100ughela-3	13127	IPI00007343	IPI00007343	IPI00007343	RING finger protein 113A;Zinc finger protein 183;SAMD13 protein;cDNA, FLJ95648, highly similar to Homo sapiens ring finger protein 113A (RNF113A), mRNA	RNF113;RNF113A;ZNF183;SAMD13	RING finger protein 113A	O15541;A2VCQ9;B2RBR7	0.999946	42.6752									0.999946	42.6752	0.0201379	100.19		4	S	DPEPGESGSSSDE	GSK3	0.081	0.0201379	100.19	_RPACDPEPGEpSGpSpSpSDEGCTVVRPEK_	RPACDPEPGES(1)GS(0.999)S(0.999)S(1)DEGCT(0.002)VVRPEK	RPACDPEPGES(42.68)GS(30.2)S(30.2)S(35.26)DEGCT(-30.2)VVRPEK	11	3	1041.7
158	90	45	45	Phosphoserine	1124	1396	3620	6650	TSenrich-100ughela-3	13127	3620	6650	TSenrich-100ughela-3	13127	IPI00007343	IPI00007343	IPI00007343	RING finger protein 113A;Zinc finger protein 183;SAMD13 protein;cDNA, FLJ95648, highly similar to Homo sapiens ring finger protein 113A (RNF113A), mRNA	RNF113;RNF113A;ZNF183;SAMD13	RING finger protein 113A	O15541;A2VCQ9;B2RBR7	0.999047	30.1983									0.999047	30.1983	0.0201379	100.19		4	S	EPGESGSSSDEGC	CK2	0.117	0.0201379	100.19	_RPACDPEPGEpSGpSpSpSDEGCTVVRPEK_	RPACDPEPGES(1)GS(0.999)S(0.999)S(1)DEGCT(0.002)VVRPEK	RPACDPEPGES(42.68)GS(30.2)S(30.2)S(35.26)DEGCT(-30.2)VVRPEK	13	3	1041.7
159	90	46	46	Phosphoserine	1124	1396	3620	6650	TSenrich-100ughela-3	13127	3620	6650	TSenrich-100ughela-3	13127	IPI00007343	IPI00007343	IPI00007343	RING finger protein 113A;Zinc finger protein 183;SAMD13 protein;cDNA, FLJ95648, highly similar to Homo sapiens ring finger protein 113A (RNF113A), mRNA	RNF113;RNF113A;ZNF183;SAMD13	RING finger protein 113A	O15541;A2VCQ9;B2RBR7	0.999047	30.1983									0.999047	30.1983	0.0201379	100.19		4	S	PGESGSSSDEGCT	CK1;CK2	0.081	0.0201379	100.19	_RPACDPEPGEpSGpSpSpSDEGCTVVRPEK_	RPACDPEPGES(1)GS(0.999)S(0.999)S(1)DEGCT(0.002)VVRPEK	RPACDPEPGES(42.68)GS(30.2)S(30.2)S(35.26)DEGCT(-30.2)VVRPEK	14	3	1041.7
160	90	47	47	Phosphoserine	1124	1396	3620	6650	TSenrich-100ughela-3	13127	3620	6650	TSenrich-100ughela-3	13127	IPI00007343	IPI00007343	IPI00007343	RING finger protein 113A;Zinc finger protein 183;SAMD13 protein;cDNA, FLJ95648, highly similar to Homo sapiens ring finger protein 113A (RNF113A), mRNA	RNF113;RNF113A;ZNF183;SAMD13	RING finger protein 113A	O15541;A2VCQ9;B2RBR7	0.999703	35.2569									0.999703	35.2569	0.0201379	100.19		4	S	GESGSSSDEGCTV	CK1	0.143	0.0201379	100.19	_RPACDPEPGEpSGpSpSpSDEGCTVVRPEK_	RPACDPEPGES(1)GS(0.999)S(0.999)S(1)DEGCT(0.002)VVRPEK	RPACDPEPGES(42.68)GS(30.2)S(30.2)S(35.26)DEGCT(-30.2)VVRPEK	15	3	1041.7
161	91	207	207	Phosphoserine	195	253	630	1118	TSenrich-100ughela-3	21251	630	1118	TSenrich-100ughela-3	21251	IPI00007675;IPI00909015;IPI00796377	IPI00007675	IPI00007675	Cytoplasmic dynein 1 light intermediate chain 1;Dynein light chain A;Dynein light intermediate chain 1, cytosolic;cDNA FLJ10219 fis, clone HEMBA1007018, highly similar to Cytoplasmic dynein 1 light intermediate chain 1;Putative uncharacterized protein DKFZp686A1525;cDNA FLJ58500, highly similar to Cytoplasmic dynein 1 light intermediate chain 1;Putative uncharacterized protein DYNC1LI1	DNCLI1;DYNC1LI1;DKFZp686A1525;DYNC1LI1	Cytoplasmic dynein 1 light intermediate chain 1;cDNA FLJ58500, highly similar to Cytoplasmic dynein 1 light intermediate chain 1;Uncharacterized protein	Q9Y6G9;B3KM42;Q6MZE7;B4DDM4;C9JGM7	1	71.2793									1	71.2793	0.00112831	112.99		1	S	GEDFPASPQRRNT	CDK1;CDK2;ERK/MAPK;Proline-directed;WW GroupIV	0.0023175	0.00112831	112.99	_DFQEYVEPGEDFPApSPQRR_	DFQEYVEPGEDFPAS(1)PQRR	DFQEY(-71.28)VEPGEDFPAS(71.28)PQRR	15	3	783.006
162	91	510	510	Phosphoserine	748	947;948	2491	4568	TSenrich-100ughela-3	12831	2491	4568	TSenrich-100ughela-3	12831	IPI00007675;IPI00909015	IPI00007675	IPI00007675	Cytoplasmic dynein 1 light intermediate chain 1;Dynein light chain A;Dynein light intermediate chain 1, cytosolic;cDNA FLJ10219 fis, clone HEMBA1007018, highly similar to Cytoplasmic dynein 1 light intermediate chain 1;Putative uncharacterized protein DKFZp686A1525;cDNA FLJ58500, highly similar to Cytoplasmic dynein 1 light intermediate chain 1	DNCLI1;DYNC1LI1;DKFZp686A1525	Cytoplasmic dynein 1 light intermediate chain 1;cDNA FLJ58500, highly similar to Cytoplasmic dynein 1 light intermediate chain 1	Q9Y6G9;B3KM42;Q6MZE7;B4DDM4	0.889596	12.6481									0.889596	12.6481	0.00687381	98.271		1	S	RKPVTVSPTTPTS	Proline-directed	0.05	0.00687381	98.271	_KPVTVpSPTTPTSPTEGEAS_	KPVT(0.048)VS(0.89)PT(0.044)T(0.009)PT(0.009)SPTEGEAS	KPVT(-12.65)VS(12.65)PT(-13.06)T(-20.04)PT(-20.04)S(-32.6)PT(-67.02)EGEAS(-79.89)	6	2	983.456
163	91	415	415		1416	1784	4592	8162	TSenrich-100ughela-2	16724	4591	8161	TSenrich-100ughela-1	12155	IPI00007675;IPI00909015	IPI00007675	IPI00007675	Cytoplasmic dynein 1 light intermediate chain 1;Dynein light chain A;Dynein light intermediate chain 1, cytosolic;cDNA FLJ10219 fis, clone HEMBA1007018, highly similar to Cytoplasmic dynein 1 light intermediate chain 1;Putative uncharacterized protein DKFZp686A1525;cDNA FLJ58500, highly similar to Cytoplasmic dynein 1 light intermediate chain 1	DNCLI1;DYNC1LI1;DKFZp686A1525	Cytoplasmic dynein 1 light intermediate chain 1;cDNA FLJ58500, highly similar to Cytoplasmic dynein 1 light intermediate chain 1	Q9Y6G9;B3KM42;Q6MZE7;B4DDM4	0.799767	6.90377	0.000195164	-36.9429	0.0881903	81.594	0.799767	6.90377	0.418755	56.32						1	S	PNRSVSSNVASVS	CK1;GSK3	0.081	0.0881903	81.594	_SVSpSNVASVSPIPAGSK_	S(0.009)VS(0.163)S(0.8)NVAS(0.012)VS(0.015)PIPAGSK	S(-19.49)VS(-6.9)S(6.9)NVAS(-18.13)VS(-17.17)PIPAGS(-32.52)K	4	2	833.906
164	92	100	100	Phosphoserine	1273	1584	4072	7394	TSenrich-100ughela-2	15862	4072	7394	TSenrich-100ughela-2	15862	IPI00007722;IPI00942246;IPI00974042;IPI00184670	IPI00007722	IPI00007722	cDNA, FLJ95309, highly similar to Homo sapiens adenosine monophosphate deaminase 2 (isoform L)(AMPD2), mRNA;Adenosine monophosphate deaminase 2 (Isoform L);AMP deaminase 2;AMP deaminase isoform L;AMP deaminase 2;AMP deaminase isoform L;cDNA FLJ55345, highly similar to AMP deaminase 2 (EC 3.5.4.6)	AMPD2;RP5-1160K1.5-002;AMPD2;AMPD2	Adenosine monophosphate deaminase 2;Isoform Ex1B-2-3 of AMP deaminase 2;Protein;Isoform Ex1A-2-3 of AMP deaminase 2	B2RB47;Q5T694;Q01433-1;Q01433;Q01433-2;B4DK50	1	96.8651	1	46.0352	0.467121	46.035	1	96.8651	0.0160287	96.865						1	S	PLQSARSLPGPAP	CK1	0.081	0.0160287	96.865	_pSLPGPAPCLK_	S(1)LPGPAPCLK	S(96.87)LPGPAPCLK	1	2	560.267
165	94	87	87	Phosphoserine	986;1122	1238;1394	3614	6644	TSenrich-100ughela-2	20388	3609	6633	TSenrich-100ughela-3	21821	IPI00384857;IPI00007764;IPI00447316;IPI00917313	IPI00384857	IPI00384857	Androgen-regulated protein 2;Hematological and neurological expressed 1 protein;Androgen-regulated protein 2;Hematological and neurological expressed 1 protein;Androgen-regulated protein 2;Hematological and neurological expressed 1 protein;Putative uncharacterized protein HN1	ARM2;HN1;ARM2;HN1;ARM2;HN1;HN1	Isoform 2 of Hematological and neurological expressed 1 protein;Isoform 1 of Hematological and neurological expressed 1 protein;Isoform 3 of Hematological and neurological expressed 1 protein;Uncharacterized protein	Q9UK76-2;Q9UK76;Q9UK76-1;Q9UK76-3;B8ZZT7	0.497656	0	0.196178	-6.12508	2.77315e-35	197.39	0.497656	0	6.7411e-61	221.18	0.882473	8.98641	5.16821e-62	230.39		1	S	GLQRRNSSEASSG	CAMK2;CHK1;CHK1/2;GSK3;PKA;PKD	0.003192	5.16821e-62	230.39	_RNpSSEASSGDFLDLK_	RNS(0.498)S(0.498)EAS(0.005)SGDFLDLK	RNS(0)S(0)EAS(-20.28)S(-44.42)GDFLDLK	3	3	569.252
166	94	88	88	Phosphoserine	986;1122	1238;1394	3614	6644	TSenrich-100ughela-2	20388	3609	6633	TSenrich-100ughela-3	21821	IPI00384857;IPI00007764;IPI00447316;IPI00917313	IPI00384857	IPI00384857	Androgen-regulated protein 2;Hematological and neurological expressed 1 protein;Androgen-regulated protein 2;Hematological and neurological expressed 1 protein;Androgen-regulated protein 2;Hematological and neurological expressed 1 protein;Putative uncharacterized protein HN1	ARM2;HN1;ARM2;HN1;ARM2;HN1;HN1	Isoform 2 of Hematological and neurological expressed 1 protein;Isoform 1 of Hematological and neurological expressed 1 protein;Isoform 3 of Hematological and neurological expressed 1 protein;Uncharacterized protein	Q9UK76-2;Q9UK76;Q9UK76-1;Q9UK76-3;B8ZZT7	0.497656	0	0.803819	6.12508	2.77315e-35	197.39	0.497656	0	6.7411e-61	221.18	0.111445	-8.98641	5.16821e-62	230.39		1	S	LQRRNSSEASSGD	CAMK2;GSK3	0.042	5.16821e-62	230.39	_RNpSSEASSGDFLDLK_	RNS(0.498)S(0.498)EAS(0.005)SGDFLDLK	RNS(0)S(0)EAS(-20.28)S(-44.42)GDFLDLK	4	3	569.252
167	95	77	77	Phosphoserine	261	346	867	1544	TSenrich-100ughela-2	18682	867	1544	TSenrich-100ughela-2	18682	IPI00007879;IPI00556557	IPI00007879	IPI00007879	Serum response factor;cDNA FLJ51683, highly similar to Serum response factor;Serum response factor (C-fos serum response element-binding transcription factor) variant	SRF	Serum response factor;Serum response factor (C-fos serum response element-binding transcription factor) variant (Fragment)	P11831;B4DU24;Q59GI1	0.697013	0.814477	0.831698	7.19273	0.0147831	119.05	0.697013	0.814477	2.96696e-10	151.89						4	S	TAGALYSGSEGDS	CK2	0.117	2.96696e-10	151.89	_EAAAAAATTPAPTAGALYpSGpSEGDpSEpSGEEEELGAER_	EAAAAAATTPAPT(0.001)AGALY(0.635)S(0.697)GS(0.697)EGDS(0.985)ES(0.985)GEEEELGAER	EAAAAAAT(-65.82)T(-65.82)PAPT(-33.04)AGALY(-0.81)S(0.81)GS(0.81)EGDS(14.02)ES(14.02)GEEEELGAER	19	3	1291.48
168	95	79	79	Phosphoserine	261	346	867	1544	TSenrich-100ughela-2	18682	867	1544	TSenrich-100ughela-2	18682	IPI00007879;IPI00556557	IPI00007879	IPI00007879	Serum response factor;cDNA FLJ51683, highly similar to Serum response factor;Serum response factor (C-fos serum response element-binding transcription factor) variant	SRF	Serum response factor;Serum response factor (C-fos serum response element-binding transcription factor) variant (Fragment)	P11831;B4DU24;Q59GI1	0.697013	0.814477	0.665696	-0.519929	0.0147831	119.05	0.697013	0.814477	2.96696e-10	151.89						4	S	GALYSGSEGDSES	CK2;GSK3	0.081	2.96696e-10	151.89	_EAAAAAATTPAPTAGALYpSGpSEGDpSEpSGEEEELGAER_	EAAAAAATTPAPT(0.001)AGALY(0.635)S(0.697)GS(0.697)EGDS(0.985)ES(0.985)GEEEELGAER	EAAAAAAT(-65.82)T(-65.82)PAPT(-33.04)AGALY(-0.81)S(0.81)GS(0.81)EGDS(14.02)ES(14.02)GEEEELGAER	21	3	1291.48
169	95	83	83	Phosphoserine	261	346	867	1544	TSenrich-100ughela-2	18682	867	1544	TSenrich-100ughela-2	18682	IPI00007879;IPI00556557	IPI00007879	IPI00007879	Serum response factor;cDNA FLJ51683, highly similar to Serum response factor;Serum response factor (C-fos serum response element-binding transcription factor) variant	SRF	Serum response factor;Serum response factor (C-fos serum response element-binding transcription factor) variant (Fragment)	P11831;B4DU24;Q59GI1	0.985259	14.0182	0.700157	0.519929	0.0147831	119.05	0.985259	14.0182	2.96696e-10	151.89						4	S	SGSEGDSESGEEE	CK1	0.143	2.96696e-10	151.89	_EAAAAAATTPAPTAGALYpSGpSEGDpSEpSGEEEELGAER_	EAAAAAATTPAPT(0.001)AGALY(0.635)S(0.697)GS(0.697)EGDS(0.985)ES(0.985)GEEEELGAER	EAAAAAAT(-65.82)T(-65.82)PAPT(-33.04)AGALY(-0.81)S(0.81)GS(0.81)EGDS(14.02)ES(14.02)GEEEELGAER	25	3	1291.48
170	95	85	85	Phosphoserine	261	346	867	1544	TSenrich-100ughela-2	18682	867	1544	TSenrich-100ughela-2	18682	IPI00007879;IPI00556557	IPI00007879	IPI00007879	Serum response factor;cDNA FLJ51683, highly similar to Serum response factor;Serum response factor (C-fos serum response element-binding transcription factor) variant	SRF	Serum response factor;Serum response factor (C-fos serum response element-binding transcription factor) variant (Fragment)	P11831;B4DU24;Q59GI1	0.985259	14.0182	0.700157	0.519929	0.0147831	119.05	0.985259	14.0182	2.96696e-10	151.89						4	S	SEGDSESGEEEEL	CK2	0.117	2.96696e-10	151.89	_EAAAAAATTPAPTAGALYpSGpSEGDpSEpSGEEEELGAER_	EAAAAAATTPAPT(0.001)AGALY(0.635)S(0.697)GS(0.697)EGDS(0.985)ES(0.985)GEEEELGAER	EAAAAAAT(-65.82)T(-65.82)PAPT(-33.04)AGALY(-0.81)S(0.81)GS(0.81)EGDS(14.02)ES(14.02)GEEEELGAER	27	3	1291.48
171	96	313	313	Phosphoserine	667	841	2096	3667	TSenrich-100ughela-2	12197	2096	3667	TSenrich-100ughela-2	12197	IPI00007935;IPI00553102;IPI00966347;IPI00555593;IPI00973432	IPI00007935	IPI00007935	Enigma homolog;Enigma-like PDZ and LIM domains protein;PDZ and LIM domain protein 5;cDNA FLJ54018, highly similar to PDZ and LIM domain protein 5;Putative uncharacterized protein LIM;PRO2489;Enigma homolog;Enigma-like PDZ and LIM domains protein;PDZ and LIM domain protein 5;cDNA FLJ61541, highly similar to Homo sapiens PDZ and LIM domain 5 (PDLIM5), transcript variant 2, mRNA;Enigma homolog	ENH;L9;PDLIM5;LIM;ENH;L9;PDLIM5	Isoform 1 of PDZ and LIM domain protein 5;Isoform 4 of PDZ and LIM domain protein 5;cDNA FLJ61541, highly similar to Homo sapiens PDZ and LIM domain 5 (PDLIM5), transcript variant 2, mRNA;Enigma homolog (Fragment);Protein	Q96HC4-1;Q96HC4;B7Z481;Q4W5K9;Q9P1D1;Q96HC4-4;B7Z8X5;Q59FC9	0.730142	6.68388					0.730142	6.68388	0.627459	49.208						1	S	NNSQEPSPQLASS	CK1;Proline-directed	0.05	0.627459	49.208	_KANNSQEPpSPQLASSVASTR_	KANNS(0.004)QEPS(0.73)PQLAS(0.157)S(0.103)VAS(0.005)T(0.001)R	KANNS(-23.08)QEPS(6.68)PQLAS(-6.68)S(-8.51)VAS(-21.43)T(-26.92)R	9	3	718.006
172	97	49	49		144	191;192;193	469	724	TSenrich-100ughela-2	16337	468	722	TSenrich-100ughela-1	14869	IPI00965438;IPI00007955;IPI00937485	IPI00965438	IPI00965438	Putative uncharacterized protein;Estrogen-responsive B box protein;Tripartite motif-containing protein 16;cDNA, FLJ95381, Homo sapiens tripartite motif-containing 16 (TRIM16), mRNA;cDNA FLJ11173 fis, clone PLACE1007346, highly similar to Tripartite motif-containing protein 16	EBBP;TRIM16	Putative uncharacterized protein;Isoform 1 of Tripartite motif-containing protein 16;hypothetical protein XP_002347761	Q59EB2;O95361-1;O95361;B2RB95;B3KMJ2	0.392477	2.84117	9.14887e-05	-37.2095	1.35401e-10	154.01	0.392477	2.84117	0.524584	91.827	0.313576	0.0999892	0.325743	99.975		2	S	GSPSPDSGSASPV	CK1;F box bTrCP;GSK3	0.000624338	1.35401e-10	154.01	_ATAQPPAPLSPDSGSPSPDpSGpSASPVEEEDVGSSEK_	AT(0.004)AQPPAPLS(0.39)PDS(0.229)GS(0.229)PS(0.123)PDS(0.392)GS(0.419)AS(0.184)PVEEEDVGS(0.015)S(0.015)EK	AT(-24.12)AQPPAPLS(-2.84)PDS(-2.84)GS(-2.84)PS(-7.96)PDS(2.84)GS(2.84)AS(-4.5)PVEEEDVGS(-16.87)S(-16.87)EK	20	3	1209.5
173	97	51	51		144	191;192;193	469	724	TSenrich-100ughela-2	16337	468	722	TSenrich-100ughela-1	14869	IPI00965438;IPI00007955;IPI00937485	IPI00965438	IPI00965438	Putative uncharacterized protein;Estrogen-responsive B box protein;Tripartite motif-containing protein 16;cDNA, FLJ95381, Homo sapiens tripartite motif-containing 16 (TRIM16), mRNA;cDNA FLJ11173 fis, clone PLACE1007346, highly similar to Tripartite motif-containing protein 16	EBBP;TRIM16	Putative uncharacterized protein;Isoform 1 of Tripartite motif-containing protein 16;hypothetical protein XP_002347761	Q59EB2;O95361-1;O95361;B2RB95;B3KMJ2	0.419341	2.84117	0.000345513	-36.6781	1.35401e-10	154.01	0.419341	2.84117	0.524584	91.827	0.311977	-0.0999892	0.325743	99.975		2	S	PSPDSGSASPVEE			1.35401e-10	154.01	_ATAQPPAPLSPDSGSPSPDpSGpSASPVEEEDVGSSEK_	AT(0.004)AQPPAPLS(0.39)PDS(0.229)GS(0.229)PS(0.123)PDS(0.392)GS(0.419)AS(0.184)PVEEEDVGS(0.015)S(0.015)EK	AT(-24.12)AQPPAPLS(-2.84)PDS(-2.84)GS(-2.84)PS(-7.96)PDS(2.84)GS(2.84)AS(-4.5)PVEEEDVGS(-16.87)S(-16.87)EK	22	3	1209.5
174	98	380	380	Phosphoserine	1119	1391	3604	6621	TSenrich-100ughela-3	11808	3603	6619	TSenrich-100ughela-3	10799	IPI00008011;IPI00552037;REV__IPI00007739;IPI00021840;IPI00643522	IPI00008011	IPI00008011	DNA polymerase eta;RAD30 homolog A;Xeroderma pigmentosum variant type protein;cDNA FLJ13831 fis, clone THYRO1000662, highly similar to DNA polymerase eta (EC 2.7.7.7);cDNA FLJ16395 fis, clone TRACH2024139, highly similar to DNA polymerase eta (EC 2.7.7.7);cDNA FLJ52108, highly similar to DNA polymerase eta (EC 2.7.7.7);cDNA, FLJ79050, highly similar to DNA polymerase eta (EC 2.7.7.7);DNA polymera…	POLH;RAD30;RAD30A;XPV;POLH;RAD30;RAD30A;XPV;HEMK;HEMK1;OK/SW-cl.2;RPS6;hCG_1741512;RP11-513M16.6-001;hCG_1741512;RP11-513M16.6-002;RPS6	Isoform 1 of DNA polymerase eta;Isoform 2 of DNA polymerase eta;>IPI:IPI00007739.1|SWISS-PROT:Q9Y5R4|TREMBL:B2RA37|ENSEMBL:ENSP00000232854;ENSP00000404334;ENSP00000404843|REFSEQ:NP_057257|H-INV:HIT000009247|VEGA:OTTHUMP00000171279;OTTHUMP00000171280;OTTHUM	Q9Y253-1;Q9Y253;B3KN75;B3KVC6;B4DG64;B7ZA36;Q9Y253-2;Q9Y5R4;B2RA37;P62753;A2A3R6;Q96DV6;A2A3R5	0.938146	11.809									0.938146	11.809	0.00353107	100.4		1	S	GDKRLSSLRRCCA	CAMK2;PKA;PKC	0.001764	0.00353107	100.4	_RLSpSLR_	RLS(0.062)S(0.938)LR	RLS(-11.81)S(11.81)LR	4	2	406.213
175	99	435	435	Phosphoserine	637	806	2017	3543	TSenrich-100ughela-2	18758	2017	3543	TSenrich-100ughela-2	18758	IPI00008137;IPI00797660	IPI00008137	IPI00008137	Zinc finger and BTB domain-containing protein 21;Zinc finger protein 295;cDNA FLJ60152, highly similar to Zinc finger protein 295;Putative uncharacterized protein DKFZp781N1974;Zinc finger protein 295, isoform CRA_a;Zinc finger protein long form;Zinc finger protein short form	KIAA1227;ZBTB21;ZNF295;DKFZp781N1974;hCG_1643569;ZNF295	Zinc finger protein 295;zinc finger protein 295 isoform S	Q9ULJ3;B4DTN6;Q5H9S0;Q5R2W2;Q5R2W1	0.577632	1.24368	0.178255	-6.65017	0.0308774	95.2	0.577632	1.24368	0.000688109	128.16						2	S	IKTEPSSPLSDPS	CK1;ERK/MAPK;Polo box;Proline-directed;WW GroupIV	0.0023175	0.000688109	128.16	_IKpTEPSpSPLSDPSDIIR_	IKT(0.985)EPS(0.438)S(0.578)PLSDPSDIIR	IKT(15.68)EPS(-1.24)S(1.24)PLS(-66.35)DPS(-123.41)DIIR	7	3	672.309
176	100	123	123	Phosphoserine	277	368;369	919	1624	TSenrich-100ughela-1	10884	918	1623	TSenrich-100ughela-3	13841	IPI00008219	IPI00008219	IPI00008219	UV excision repair protein RAD23 homolog A;cDNA FLJ78534, highly similar to Homo sapiens RAD23 homolog A (S. cerevisiae), mRNA;cDNA FLJ51789, highly similar to UV excision repair protein RAD23 homolog A;UV excision repair protein RAD23 homolog A variant;RAD23 homolog A (S. cerevisiae)	RAD23A	UV excision repair protein RAD23 homolog A	P54725;A8K1J3;B4DDJ7;Q59EU8;Q5M7Z1	0.621129	4.11599	0.621129	4.11599	0.70773	63.161					0.326747	-0.0730663	0.098761	96.114		1	S	AAREDKSPSEESA	CK2;Proline-directed	0.05	0.098761	96.114	_EDKpSPSEESAPTTSPESVSGSVPSSGSSGR_	EDKS(0.621)PS(0.241)EES(0.136)APT(0.001)T(0.001)SPESVSGSVPSSGSSGR	EDKS(4.12)PS(-4.12)EES(-6.61)APT(-26.36)T(-29.88)S(-35.73)PES(-40.05)VS(-41.86)GS(-41.86)VPS(-45.4)S(-45.4)GS(-44.55)S(-44.52)GR	4	3	1001.43
177	101	160	160	Phosphoserine	1026	1285	3315	6109	TSenrich-100ughela-3	13317	3315	6109	TSenrich-100ughela-3	13317	IPI00008223;IPI00642549;IPI00479614	IPI00008223	IPI00008223	UV excision repair protein RAD23 homolog B;XP-C repair-complementing complex 58 kDa protein;cDNA FLJ50817, highly similar to UV excision repair protein RAD23 homolog B;cDNA, FLJ79088, highly similar to UV excision repair protein RAD23 homolog B;UV excision repair protein RAD23 homolog B variant;RAD23-like protein B;cDNA FLJ56531, highly similar to UV excision repair protein RAD23 homolog B;RAD23 …	RAD23B;RAD23B;RP11-131A5.1-002;RAD23B;RP11-131A5.1-004	UV excision repair protein RAD23 homolog B;cDNA FLJ56531, highly similar to UV excision repair protein RAD23 homolog B;RAD23 homolog B	P54727;B7Z4W4;B7ZA74;Q53F10;Q7Z5K8;B4DEA3;Q5W0S5;Q5W0S3	0.643978	7.6294									0.643978	7.6294	0.0554133	98.347		1	S	ETPVATSPTATDS	Proline-directed	0.05	0.0554133	98.347	_QEKPAEKPAETPVATpSPTATDSTSGDSSR_	QEKPAEKPAETPVAT(0.111)S(0.644)PT(0.111)AT(0.096)DS(0.017)T(0.017)S(0.003)GDSSR	QEKPAEKPAET(-43.74)PVAT(-7.63)S(7.63)PT(-7.63)AT(-8.28)DS(-15.69)T(-15.69)S(-22.91)GDS(-50.01)S(-50.01)R	16	3	1009.13
178	103	57	57	Phosphoserine	103	140	338	544	TSenrich-100ughela-2	14243	337	543	TSenrich-100ughela-1	13040	IPI00008422;IPI00220119;IPI00964035	IPI00008422	IPI00008422	ATP-dependent helicase 1;SWI/SNF-related matrix-associated actin-dependent regulator of chromatin subfamily A containing DEAD/H box 1;ATP-dependent helicase 1;SWI/SNF-related matrix-associated actin-dependent regulator of chromatin subfamily A containing DEAD/H box 1;SMARCAD1 protein	KIAA1122;SMARCAD1;KIAA1122;SMARCAD1	Isoform 2 of SWI/SNF-related matrix-associated actin-dependent regulator of chromatin subfamily A containing DEAD/H box 1;Isoform 1 of SWI/SNF-related matrix-associated actin-dependent regulator of chromatin subfamily A containing DEAD/H box 1;Uncharacteri	Q9H4L7-2;Q9H4L7;Q9H4L7-1;Q05D56;D6RAY8	0.652224	0.58863	0.574075	1.29003	0.0013291	109.17	0.652224	0.58863	0.657748	52.764						2	S	RANTPDSDITEKT			0.0013291	109.17	_ANTPDpSDIpTEKTEDSSVPETPDNER_	ANT(0.606)PDS(0.652)DIT(0.664)EKT(0.028)EDS(0.026)S(0.025)VPETPDNER	ANT(-0.59)PDS(0.59)DIT(0.88)EKT(-16.8)EDS(-16.58)S(-16.89)VPET(-40.24)PDNER	6	3	969.72
179	103	124	124	Phosphoserine	254	332;333	834	1501	TSenrich-100ughela-1	20141	831	1498	TSenrich-100ughela-3	21285	IPI00008422;IPI00220119;IPI00964035	IPI00008422	IPI00008422	ATP-dependent helicase 1;SWI/SNF-related matrix-associated actin-dependent regulator of chromatin subfamily A containing DEAD/H box 1;ATP-dependent helicase 1;SWI/SNF-related matrix-associated actin-dependent regulator of chromatin subfamily A containing DEAD/H box 1;SMARCAD1 protein	KIAA1122;SMARCAD1;KIAA1122;SMARCAD1	Isoform 2 of SWI/SNF-related matrix-associated actin-dependent regulator of chromatin subfamily A containing DEAD/H box 1;Isoform 1 of SWI/SNF-related matrix-associated actin-dependent regulator of chromatin subfamily A containing DEAD/H box 1;Uncharacteri	Q9H4L7-2;Q9H4L7;Q9H4L7-1;Q05D56;D6RAY8	0.995148	24.0013	0.995148	24.0013	0.320127	72.159	0.999168	30.8358	5.36107e-06	120.38	0.999993	51.5147	5.29791e-06	120.51		3	S	DTVIIVSEPSEDE			5.29791e-06	120.51	_DTVIIVpSEPpSEDEEpSQGLPTMAR_	DT(0.005)VIIVS(0.995)EPS(0.995)EDEES(0.977)QGLPT(0.027)MAR	DT(-25.08)VIIVS(24)EPS(24.4)EDEES(16.87)QGLPT(-16.87)MAR	7	3	915.033
180	103	127	127	Phosphoserine	254	332;333	834	1501	TSenrich-100ughela-1	20141	831	1498	TSenrich-100ughela-3	21285	IPI00008422;IPI00220119;IPI00964035	IPI00008422	IPI00008422	ATP-dependent helicase 1;SWI/SNF-related matrix-associated actin-dependent regulator of chromatin subfamily A containing DEAD/H box 1;ATP-dependent helicase 1;SWI/SNF-related matrix-associated actin-dependent regulator of chromatin subfamily A containing DEAD/H box 1;SMARCAD1 protein	KIAA1122;SMARCAD1;KIAA1122;SMARCAD1	Isoform 2 of SWI/SNF-related matrix-associated actin-dependent regulator of chromatin subfamily A containing DEAD/H box 1;Isoform 1 of SWI/SNF-related matrix-associated actin-dependent regulator of chromatin subfamily A containing DEAD/H box 1;Uncharacteri	Q9H4L7-2;Q9H4L7;Q9H4L7-1;Q05D56;D6RAY8	0.995417	24.3955	0.995417	24.3955	0.320127	72.159	0.999279	31.4663	5.36107e-06	120.38	0.999994	53.0806	5.29791e-06	120.51		3	S	IIVSEPSEDEESQ	CK1;CK2	0.081	5.29791e-06	120.51	_DTVIIVpSEPpSEDEEpSQGLPTMAR_	DT(0.005)VIIVS(0.995)EPS(0.995)EDEES(0.977)QGLPT(0.027)MAR	DT(-25.08)VIIVS(24)EPS(24.4)EDEES(16.87)QGLPT(-16.87)MAR	10	3	915.033
181	103	132	132	Phosphoserine	254	332;333	834	1501	TSenrich-100ughela-1	20141	831	1498	TSenrich-100ughela-3	21285	IPI00008422;IPI00220119;IPI00964035	IPI00008422	IPI00008422	ATP-dependent helicase 1;SWI/SNF-related matrix-associated actin-dependent regulator of chromatin subfamily A containing DEAD/H box 1;ATP-dependent helicase 1;SWI/SNF-related matrix-associated actin-dependent regulator of chromatin subfamily A containing DEAD/H box 1;SMARCAD1 protein	KIAA1122;SMARCAD1;KIAA1122;SMARCAD1	Isoform 2 of SWI/SNF-related matrix-associated actin-dependent regulator of chromatin subfamily A containing DEAD/H box 1;Isoform 1 of SWI/SNF-related matrix-associated actin-dependent regulator of chromatin subfamily A containing DEAD/H box 1;Uncharacteri	Q9H4L7-2;Q9H4L7;Q9H4L7-1;Q05D56;D6RAY8	0.976973	16.875	0.976973	16.875	0.320127	72.159	0.00154222	-30.8358	5.36107e-06	120.38	0.999797	36.9211	5.29791e-06	120.51		3	S	PSEDEESQGLPTM			5.29791e-06	120.51	_DTVIIVpSEPpSEDEEpSQGLPTMAR_	DT(0.005)VIIVS(0.995)EPS(0.995)EDEES(0.977)QGLPT(0.027)MAR	DT(-25.08)VIIVS(24)EPS(24.4)EDEES(16.87)QGLPT(-16.87)MAR	15	3	915.033
182	103	95	95	Phosphoserine	453	582;583	1448	2488	TSenrich-100ughela-2	21122	1448	2488	TSenrich-100ughela-2	21122	IPI00008422;IPI00220119;IPI00964035	IPI00008422	IPI00008422	ATP-dependent helicase 1;SWI/SNF-related matrix-associated actin-dependent regulator of chromatin subfamily A containing DEAD/H box 1;ATP-dependent helicase 1;SWI/SNF-related matrix-associated actin-dependent regulator of chromatin subfamily A containing DEAD/H box 1;SMARCAD1 protein	KIAA1122;SMARCAD1;KIAA1122;SMARCAD1	Isoform 2 of SWI/SNF-related matrix-associated actin-dependent regulator of chromatin subfamily A containing DEAD/H box 1;Isoform 1 of SWI/SNF-related matrix-associated actin-dependent regulator of chromatin subfamily A containing DEAD/H box 1;Uncharacteri	Q9H4L7-2;Q9H4L7;Q9H4L7-1;Q05D56;D6RAY8	0.666562	0	0.666631	0	3.64914e-34	191.86	0.666562	0	1.3579e-34	198.92	0.66662	0	2.67221e-20	172.82		2	S	IQYIDLSSDSEDV			1.3579e-34	198.92	_GIQYIDLpSpSDSEDVVSPNCSNTVQEK_	GIQYIDLS(0.667)S(0.667)DS(0.667)EDVVSPNCSNTVQEK	GIQY(-35.01)IDLS(0)S(0)DS(0)EDVVS(-77.02)PNCS(-127.24)NT(-127.24)VQEK	8	3	1015.42
183	103	96	96	Phosphoserine	453	582;583	1448	2488	TSenrich-100ughela-2	21122	1448	2488	TSenrich-100ughela-2	21122	IPI00008422;IPI00220119;IPI00964035	IPI00008422	IPI00008422	ATP-dependent helicase 1;SWI/SNF-related matrix-associated actin-dependent regulator of chromatin subfamily A containing DEAD/H box 1;ATP-dependent helicase 1;SWI/SNF-related matrix-associated actin-dependent regulator of chromatin subfamily A containing DEAD/H box 1;SMARCAD1 protein	KIAA1122;SMARCAD1;KIAA1122;SMARCAD1	Isoform 2 of SWI/SNF-related matrix-associated actin-dependent regulator of chromatin subfamily A containing DEAD/H box 1;Isoform 1 of SWI/SNF-related matrix-associated actin-dependent regulator of chromatin subfamily A containing DEAD/H box 1;Uncharacteri	Q9H4L7-2;Q9H4L7;Q9H4L7-1;Q05D56;D6RAY8	0.666562	0	0.666631	0	3.64914e-34	191.86	0.666562	0	1.3579e-34	198.92	0.66662	0	2.67221e-20	172.82		2	S	QYIDLSSDSEDVV	CK2	0.117	1.3579e-34	198.92	_GIQYIDLpSpSDSEDVVSPNCSNTVQEK_	GIQYIDLS(0.667)S(0.667)DS(0.667)EDVVSPNCSNTVQEK	GIQY(-35.01)IDLS(0)S(0)DS(0)EDVVS(-77.02)PNCS(-127.24)NT(-127.24)VQEK	9	3	1015.42
184	103	98	98	Phosphoserine	453	582;583	1448	2488	TSenrich-100ughela-2	21122	1448	2488	TSenrich-100ughela-2	21122	IPI00008422;IPI00220119;IPI00964035	IPI00008422	IPI00008422	ATP-dependent helicase 1;SWI/SNF-related matrix-associated actin-dependent regulator of chromatin subfamily A containing DEAD/H box 1;ATP-dependent helicase 1;SWI/SNF-related matrix-associated actin-dependent regulator of chromatin subfamily A containing DEAD/H box 1;SMARCAD1 protein	KIAA1122;SMARCAD1;KIAA1122;SMARCAD1	Isoform 2 of SWI/SNF-related matrix-associated actin-dependent regulator of chromatin subfamily A containing DEAD/H box 1;Isoform 1 of SWI/SNF-related matrix-associated actin-dependent regulator of chromatin subfamily A containing DEAD/H box 1;Uncharacteri	Q9H4L7-2;Q9H4L7;Q9H4L7-1;Q05D56;D6RAY8	0.666562	0	0.666631	0	3.64914e-34	191.86	0.666562	0	1.3579e-34	198.92	0.66662	0	2.67221e-20	172.82		2	S	IDLSSDSEDVVSP	CK1	0.081	1.3579e-34	198.92	_GIQYIDLpSpSDSEDVVSPNCSNTVQEK_	GIQYIDLS(0.667)S(0.667)DS(0.667)EDVVSPNCSNTVQEK	GIQY(-35.01)IDLS(0)S(0)DS(0)EDVVS(-77.02)PNCS(-127.24)NT(-127.24)VQEK	11	3	1015.42
185	103	211	211	Phosphoserine	721;722	908;909;910	2378	4242	TSenrich-100ughela-2	16871	2377	4241	TSenrich-100ughela-1	15172	IPI00008422;IPI00220119;IPI00964035	IPI00008422	IPI00008422	ATP-dependent helicase 1;SWI/SNF-related matrix-associated actin-dependent regulator of chromatin subfamily A containing DEAD/H box 1;ATP-dependent helicase 1;SWI/SNF-related matrix-associated actin-dependent regulator of chromatin subfamily A containing DEAD/H box 1;SMARCAD1 protein	KIAA1122;SMARCAD1;KIAA1122;SMARCAD1	Isoform 2 of SWI/SNF-related matrix-associated actin-dependent regulator of chromatin subfamily A containing DEAD/H box 1;Isoform 1 of SWI/SNF-related matrix-associated actin-dependent regulator of chromatin subfamily A containing DEAD/H box 1;Uncharacteri	Q9H4L7-2;Q9H4L7;Q9H4L7-1;Q05D56;D6RAY8	0.964635	14.7704	0.971004	15.2127	6.15026e-12	149.39	0.964635	14.7704	1.66359e-07	141.83	0.997001	22.468	4.06722e-07	134.41		2	S	PRKRKLSSSSEPY	CAMK2;PKA;PKA/AKT	0.001764	6.15026e-12	149.39	_KLpSSpSSEPYEEDEFNDDQSIKK_	KLS(0.965)S(0.31)S(0.427)S(0.297)EPY(0.001)EEDEFNDDQSIKK	KLS(14.77)S(-1.51)S(1.51)S(-1.67)EPY(-25.5)EEDEFNDDQS(-55.44)IKK	3	3	912.372
186	103	213	213	Phosphoserine	721;722	908;909;910	2378	4242	TSenrich-100ughela-2	16871	2377	4241	TSenrich-100ughela-1	15172	IPI00008422;IPI00220119;IPI00964035	IPI00008422	IPI00008422	ATP-dependent helicase 1;SWI/SNF-related matrix-associated actin-dependent regulator of chromatin subfamily A containing DEAD/H box 1;ATP-dependent helicase 1;SWI/SNF-related matrix-associated actin-dependent regulator of chromatin subfamily A containing DEAD/H box 1;SMARCAD1 protein	KIAA1122;SMARCAD1;KIAA1122;SMARCAD1	Isoform 2 of SWI/SNF-related matrix-associated actin-dependent regulator of chromatin subfamily A containing DEAD/H box 1;Isoform 1 of SWI/SNF-related matrix-associated actin-dependent regulator of chromatin subfamily A containing DEAD/H box 1;Uncharacteri	Q9H4L7-2;Q9H4L7;Q9H4L7-1;Q05D56;D6RAY8	0.427211	1.50902	0.522804	1.14202	6.15026e-12	149.39	0.427211	1.50902	1.66359e-07	141.83	0.667196	1.9701	4.06722e-07	134.41		2	S	KRKLSSSSEPYEE	NEK6	0.076	6.15026e-12	149.39	_KLpSSpSSEPYEEDEFNDDQSIKK_	KLS(0.965)S(0.31)S(0.427)S(0.297)EPY(0.001)EEDEFNDDQSIKK	KLS(14.77)S(-1.51)S(1.51)S(-1.67)EPY(-25.5)EEDEFNDDQS(-55.44)IKK	5	3	912.372
187	104	500	500	Phosphoserine	207;348	272;273;455	1121	1958	TSenrich-100ughela-3	18295	678	1200	TSenrich-100ughela-3	14168	IPI00395337;IPI00658114;IPI00008449	IPI00395337	IPI00395337	Factor interacting with PAP;FIP1-like 1 protein;Pre-mRNA 3'-end-processing factor FIP1;Rearranged in hypereosinophilia;cDNA FLJ56493, highly similar to Pre-mRNA 3'-end-processing factor FIP1;Factor interacting with PAP;FIP1-like 1 protein;Pre-mRNA 3'-end-processing factor FIP1;Rearranged in hypereosinophilia	FIP1;FIP1L1;RHE;FIP1;FIP1L1;RHE	Isoform 1 of Pre-mRNA 3'-end-processing factor FIP1;pre-mRNA 3'-end-processing factor FIP1 isoform 2;Isoform 3 of Pre-mRNA 3'-end-processing factor FIP1	Q6UN15-1;Q6UN15;B4DIR3;Q6UN15-3	0.997687	26.5277									0.997687	26.5277	9.27335e-11	155.23		2	S	TPSVFNSDEERYR	CK1;CK2	0.117	9.27335e-11	155.23	_ERDHSPpTPSVFNpSDEER_	ERDHS(0.351)PT(0.649)PS(0.002)VFNS(0.998)DEER	ERDHS(-2.67)PT(2.67)PS(-26.53)VFNS(26.53)DEER	13	3	721.279
188	104	85	85	Phosphoserine	1671	2109;2110	5386	9520	TSenrich-100ughela-2	20342	5380	9509	TSenrich-100ughela-1	18044	IPI00395337;IPI00658114;IPI00008449;IPI00965445;IPI00965581	IPI00395337	IPI00395337	Factor interacting with PAP;FIP1-like 1 protein;Pre-mRNA 3'-end-processing factor FIP1;Rearranged in hypereosinophilia;cDNA FLJ56493, highly similar to Pre-mRNA 3'-end-processing factor FIP1;Factor interacting with PAP;FIP1-like 1 protein;Pre-mRNA 3'-end-processing factor FIP1;Rearranged in hypereosinophilia;Factor interacting with PAP;FIP1-like 1 protein;Pre-mRNA 3'-end-processing factor FIP1;Re…	FIP1;FIP1L1;RHE;FIP1;FIP1L1;RHE;FIP1;FIP1L1;RHE	Isoform 1 of Pre-mRNA 3'-end-processing factor FIP1;pre-mRNA 3'-end-processing factor FIP1 isoform 2;Isoform 3 of Pre-mRNA 3'-end-processing factor FIP1;95 kDa protein;Isoform 4 of Pre-mRNA 3'-end-processing factor FIP1	Q6UN15-1;Q6UN15;B4DIR3;Q6UN15-3;Q6UN15-4	0.999753	35.5032	0.999996	53.9961	1.64601e-10	145.26	0.999753	35.5032	7.69128e-06	123.54	0.998123	24.9632	1.07316e-09	135.93		4	S	TETEDDSDSDSDD	CK1;CK2;GSK3	0.081	1.64601e-10	145.26	_VTEpTEDDpSDpSDpSDDDEDDVHVTIGDIK_	VT(0.138)ET(0.863)EDDS(1)DS(1)DS(1)DDDEDDVHVTIGDIK	VT(-7.98)ET(7.98)EDDS(35.5)DS(35.5)DS(42.29)DDDEDDVHVT(-47.19)IGDIK	8	3	1096.03
189	104	87	87	Phosphoserine	1671	2109;2110	5386	9520	TSenrich-100ughela-2	20342	5380	9509	TSenrich-100ughela-1	18044	IPI00395337;IPI00658114;IPI00008449;IPI00965445;IPI00965581	IPI00395337	IPI00395337	Factor interacting with PAP;FIP1-like 1 protein;Pre-mRNA 3'-end-processing factor FIP1;Rearranged in hypereosinophilia;cDNA FLJ56493, highly similar to Pre-mRNA 3'-end-processing factor FIP1;Factor interacting with PAP;FIP1-like 1 protein;Pre-mRNA 3'-end-processing factor FIP1;Rearranged in hypereosinophilia;Factor interacting with PAP;FIP1-like 1 protein;Pre-mRNA 3'-end-processing factor FIP1;Re…	FIP1;FIP1L1;RHE;FIP1;FIP1L1;RHE;FIP1;FIP1L1;RHE	Isoform 1 of Pre-mRNA 3'-end-processing factor FIP1;pre-mRNA 3'-end-processing factor FIP1 isoform 2;Isoform 3 of Pre-mRNA 3'-end-processing factor FIP1;95 kDa protein;Isoform 4 of Pre-mRNA 3'-end-processing factor FIP1	Q6UN15-1;Q6UN15;B4DIR3;Q6UN15-3;Q6UN15-4	0.999752	35.5032	0.999999	60.1326	1.64601e-10	145.26	0.999752	35.5032	7.69128e-06	123.54	0.99772	24.1144	1.07316e-09	135.93		4	S	TEDDSDSDSDDDE	CK2	0.117	1.64601e-10	145.26	_VTEpTEDDpSDpSDpSDDDEDDVHVTIGDIK_	VT(0.138)ET(0.863)EDDS(1)DS(1)DS(1)DDDEDDVHVTIGDIK	VT(-7.98)ET(7.98)EDDS(35.5)DS(35.5)DS(42.29)DDDEDDVHVT(-47.19)IGDIK	10	3	1096.03
190	104	89	89	Phosphoserine	1671	2109;2110	5386	9520	TSenrich-100ughela-2	20342	5380	9509	TSenrich-100ughela-1	18044	IPI00395337;IPI00658114;IPI00008449;IPI00965445;IPI00965581	IPI00395337	IPI00395337	Factor interacting with PAP;FIP1-like 1 protein;Pre-mRNA 3'-end-processing factor FIP1;Rearranged in hypereosinophilia;cDNA FLJ56493, highly similar to Pre-mRNA 3'-end-processing factor FIP1;Factor interacting with PAP;FIP1-like 1 protein;Pre-mRNA 3'-end-processing factor FIP1;Rearranged in hypereosinophilia;Factor interacting with PAP;FIP1-like 1 protein;Pre-mRNA 3'-end-processing factor FIP1;Re…	FIP1;FIP1L1;RHE;FIP1;FIP1L1;RHE;FIP1;FIP1L1;RHE	Isoform 1 of Pre-mRNA 3'-end-processing factor FIP1;pre-mRNA 3'-end-processing factor FIP1 isoform 2;Isoform 3 of Pre-mRNA 3'-end-processing factor FIP1;95 kDa protein;Isoform 4 of Pre-mRNA 3'-end-processing factor FIP1	Q6UN15-1;Q6UN15;B4DIR3;Q6UN15-3;Q6UN15-4	0.999929	42.2884	0.999999	62.2764	1.64601e-10	145.26	0.999929	42.2884	7.69128e-06	123.54	0.999435	30.1839	1.07316e-09	135.93		4	S	DDSDSDSDDDEDD	CK1;CK2	0.117	1.64601e-10	145.26	_VTEpTEDDpSDpSDpSDDDEDDVHVTIGDIK_	VT(0.138)ET(0.863)EDDS(1)DS(1)DS(1)DDDEDDVHVTIGDIK	VT(-7.98)ET(7.98)EDDS(35.5)DS(35.5)DS(42.29)DDDEDDVHVT(-47.19)IGDIK	12	3	1096.03
191	105	774	774		1362	1711	4391	7859	TSenrich-100ughela-2	15338	4390	7857	TSenrich-100ughela-1	14037	IPI00102661;IPI00008477	IPI00102661	IPI00102661	Hepatocellular carcinoma-associated antigen 90;TPX2, microtubule-associated, homolog (Xenopus laevis);TPX2, microtubule-associated, homolog (Xenopus laevis), isoform CRA_a;Differentially expressed in cancerous and non-cancerous lung cells 2;Hepatocellular carcinoma-associated antigen 519;Protein fls353;Restricted expression proliferation-associated protein 100;Targeting protein for Xklp2;cDNA FLJ…	HCA90;hCG_38821;RP11-243J16.10-002;TPX2;C20orf1;C20orf2;DIL2;HCA519;TPX2;hCG_38821;HCTP4	TPX2, microtubule-associated, homolog (Xenopus laevis), isoform CRA_a;Targeting protein for Xklp2	Q96RR5;Q9ULW0;B3KM90;Q643R0;Q96FC3	0.999954	43.3658	0.999962	44.1847	0.0199401	103.71	0.999954	43.3658	0.0275049	96.84						1	S	PLTVPVSPKFSTR	CDK1;CK1;ERK/MAPK;GSK3;Proline-directed;WW GroupIV	0.0023175	0.0199401	103.71	_SSDQPLTVPVpSPK_	SSDQPLTVPVS(1)PK	S(-78.97)S(-71.8)DQPLT(-43.37)VPVS(43.37)PK	11	2	717.847
192	106	547	547	Phosphoserine	1705;1706	2150;2151	5488	9741	TSenrich-100ughela-2	16783	5483	9727	TSenrich-100ughela-3	14135	IPI00008490	IPI00008490	IPI00008490	Protein unc-93 homolog B1;UNC93B1 protein	UNC93;UNC93B;UNC93B1	Protein unc-93 homolog B1	Q9H1C4;Q05BS6;Q58F16	0.995659	23.6036	0.996292	24.2765	0.00128673	116.93	0.995659	23.6036	0.212461	114.28	0.974551	15.8074	2.87298e-09	143		2	S	YLEEDNSDESDAE			2.87298e-09	143	_YLEEDNpSDEpSDAEGEHGDGAEEEAPPAGPRPGPEPAGLGR_	Y(0.005)LEEDNS(0.996)DES(1)DAEGEHGDGAEEEAPPAGPRPGPEPAGLGR	Y(-23.6)LEEDNS(23.6)DES(34.24)DAEGEHGDGAEEEAPPAGPRPGPEPAGLGR	7	3	1421.9
193	106	550	550	Phosphoserine	1705;1706	2150;2151	5488	9741	TSenrich-100ughela-2	16783	5483	9727	TSenrich-100ughela-3	14135	IPI00008490	IPI00008490	IPI00008490	Protein unc-93 homolog B1;UNC93B1 protein	UNC93;UNC93B;UNC93B1	Protein unc-93 homolog B1	Q9H1C4;Q05BS6;Q58F16	0.999625	34.2391	0.996292	24.2765	0.00128673	116.93	0.999625	34.2391	0.212461	114.28	0.994643	22.5749	2.87298e-09	143		2	S	EDNSDESDAEGEH	CK1;CK2	0.081	2.87298e-09	143	_YLEEDNpSDEpSDAEGEHGDGAEEEAPPAGPRPGPEPAGLGR_	Y(0.005)LEEDNS(0.996)DES(1)DAEGEHGDGAEEEAPPAGPRPGPEPAGLGR	Y(-23.6)LEEDNS(23.6)DES(34.24)DAEGEHGDGAEEEAPPAGPRPGPEPAGLGR	10	3	1421.9
194	107	105	105	Phosphoserine	190;287;687	247;380;866;867;868;869	2224	3914	TSenrich-100ughela-2	25513	2168	3812	TSenrich-100ughela-2	23695	IPI00008529;IPI00008527;IPI00412779	IPI00008529	IPI00008529	60S acidic ribosomal protein P2;Renal carcinoma antigen NY-REN-44;cDNA, FLJ92222, Homo sapiens ribosomal protein, large P2 (RPLP2), mRNA;Ribosomal protein, large, P2, isoform CRA_a;RPLP2 protein;60S acidic ribosomal protein P1;RPLP1 protein;Acidic ribosomal phosphoprotein P1;Putative uncharacterized protein RPLP1;Ribosomal protein, large, P1, isoform CRA_b	D11S2243E;RPLP2;RPP2;hCG_1778304;RPLP1;RRP1;hCG_38799;RPLP1	60S acidic ribosomal protein P2;60S acidic ribosomal protein P1;60S acidic ribosomal protein P1 isoform 2	P05387;Q6FG96;P05386;Q6FG99;Q6ICQ4;Q7Z612;A6NIB2	0.999951	43.1341	0.999458	32.6585	9.65237e-110	259.94	0.999951	43.1341	1.9473e-206	325.89	0.997345	25.7482	1.03019e-33	198.01		1	S	KEESEESDDDMGF	CK1;CK2	0.081	1.9473e-206	325.89	_KEESEEpSDDDMGFGLFD_	KEESEES(1)DDDMGFGLFD	KEES(-43.13)EES(43.13)DDDMGFGLFD	7	2	1015.37
195	108	304	304	Phosphoserine	288;1587	381;382;2003;2004	5124	9077	TSenrich-100ughela-2	26045	951	1662	TSenrich-100ughela-1	26925	IPI00008530;IPI00871646;IPI00791448;IPI00556485	IPI00008530	IPI00008530	60S acidic ribosomal protein P0;60S ribosomal protein L10E;cDNA FLJ75549, highly similar to Homo sapiens ribosomal protein, large, P0 (RPLP0), transcript variant 1, mRNA;Ribosomal protein P0 variant;60S acidic ribosomal protein P0-like;cDNA FLJ51469, highly similar to 60S acidic ribosomal protein P0;RPLP0 protein;RPLP0 protein	RPLP0;RPLP0;RPLP0	60S acidic ribosomal protein P0;60S acidic ribosomal protein P0-like;cDNA FLJ51469, highly similar to 60S acidic ribosomal protein P0;RPLP0 protein	P05388;A8K4Z4;Q53HK9;Q53HW2;Q8NHW5;B4E3D5;Q3MHV2;Q3B7A4;Q6NSF2	1	166.552	1	45.4894	1.21815e-24	178.34	1	166.552	8.22168e-17	169.91	1	79.912	0.0243536	109.25		2	S	VEAKEESEESDED			1.21815e-24	178.34	_VEAKEEpSEEpSDEDMGFGLFD_	VEAKEES(1)EES(1)DEDMGFGLFD	VEAKEES(166.55)EES(166.55)DEDMGFGLFD	7	2	1211.93
196	108	307	307	Phosphoserine	288;1587	381;382;2003;2004	5124	9077	TSenrich-100ughela-2	26045	951	1662	TSenrich-100ughela-1	26925	IPI00008530;IPI00871646;IPI00791448;IPI00556485	IPI00008530	IPI00008530	60S acidic ribosomal protein P0;60S ribosomal protein L10E;cDNA FLJ75549, highly similar to Homo sapiens ribosomal protein, large, P0 (RPLP0), transcript variant 1, mRNA;Ribosomal protein P0 variant;60S acidic ribosomal protein P0-like;cDNA FLJ51469, highly similar to 60S acidic ribosomal protein P0;RPLP0 protein;RPLP0 protein	RPLP0;RPLP0;RPLP0	60S acidic ribosomal protein P0;60S acidic ribosomal protein P0-like;cDNA FLJ51469, highly similar to 60S acidic ribosomal protein P0;RPLP0 protein	P05388;A8K4Z4;Q53HK9;Q53HW2;Q8NHW5;B4E3D5;Q3MHV2;Q3B7A4;Q6NSF2	1	166.552	1	45.4894	1.21815e-24	178.34	1	166.552	8.22168e-17	169.91	1	79.912	0.0243536	109.25		2	S	KEESEESDEDMGF	CK1;CK2	0.081	1.21815e-24	178.34	_VEAKEEpSEEpSDEDMGFGLFD_	VEAKEES(1)EES(1)DEDMGFGLFD	VEAKEES(166.55)EES(166.55)DEDMGFGLFD	10	2	1211.93
197	109	257	257	Phosphoserine	351	459	1126	1968	TSenrich-100ughela-2	19718	1126	1968	TSenrich-100ughela-2	19718	IPI00008531	IPI00008531	IPI00008531	Protein CoREST;REST corepressor 1	KIAA0071;RCOR;RCOR1	REST corepressor 1	Q9UKL0	1	134.857					1	134.857	6.04174e-10	134.86						1	S	KREREESEDELEE	CAMK2;CK2;PKA/AKT	0.001764	6.04174e-10	134.86	_EREEpSEDELEEANGNNPIDIEVDQNK_	EREES(1)EDELEEANGNNPIDIEVDQNK	EREES(134.86)EDELEEANGNNPIDIEVDQNK	5	3	1032.44
198	111	361	361	Phosphoserine	149	198	479	736	TSenrich-100ughela-2	21855	479	736	TSenrich-100ughela-2	21855	IPI00008708;IPI00642046	IPI00008708	IPI00008708	CATX-11;Cellular senescence-inhibited gene protein;Protein PBK1;Ribosomal L1 domain-containing protein 1;RSL1D1 protein;cDNA FLJ52304, highly similar to Ribosomal L1 domain-containing protein 1;RSL1D1 protein	CATX11;CSIG;L12;PBK1;RSL1D1;RSL1D1	Ribosomal L1 domain-containing protein 1;RSL1D1 protein	O76021;A0PJ87;B4DJ58;Q32Q62;A0PJ61	0.98299	17.6184	0.967097	14.6823	8.21149e-24	177.08	0.98299	17.6184	6.20012e-24	179.99	0.5	0	0.0339043	91.567		1	S	VKATNESEDEIPQ	CK2	0.117	6.20012e-24	179.99	_ATNEpSEDEIPQLVPIGK_	AT(0.017)NES(0.983)EDEIPQLVPIGK	AT(-17.62)NES(17.62)EDEIPQLVPIGK	5	2	960.454
199	112	23	23		154	206	502	772	TSenrich-100ughela-2	20556	500	769	TSenrich-100ughela-3	20544	IPI00008868;IPI00965014;IPI00965821;IPI00967349	IPI00008868	IPI00008868	MAP1 light chain LC1;Microtubule-associated protein 1B;Microtubule-associated protein 1B, isoform CRA_a;MAP1B protein;Putative uncharacterized protein DKFZp686F1345;MAP1B protein	MAP1B;hCG_37848;DKFZp686F1345;MAP1B	Microtubule-associated protein 1B;Uncharacterized protein;Uncharacterized protein;Uncharacterized protein	P46821;A2BDK6;A5D6X1;Q32NB7;Q4VBY4;Q5H9P1;Q6PJD3;Q86X89;D6RA32;Q05BW8;D6RGJ3;D6RCL2	0.294295	0	0.19044	-0.580684	0.0894383	97.02	0.294295	0	0.00376992	113.03	0.183891	-1.11938	3.71515e-05	123.05		1	S	IANPAASTSPSLS	GSK3	0.081	3.71515e-05	123.05	_(ac)ATVVVEATEPEPSGSIANPAApSTSPSLSHR_	ATVVVEATEPEPS(0.007)GS(0.007)IANPAAS(0.294)T(0.294)S(0.294)PS(0.045)LS(0.057)HR	AT(-65.76)VVVEAT(-40.17)EPEPS(-15.97)GS(-15.97)IANPAAS(0)T(0)S(0)PS(-8.11)LS(-7.15)HR	22	3	1028.82
200	112	25	25		154	206	502	772	TSenrich-100ughela-2	20556	500	769	TSenrich-100ughela-3	20544	IPI00008868;IPI00965014;IPI00965821;IPI00967349	IPI00008868	IPI00008868	MAP1 light chain LC1;Microtubule-associated protein 1B;Microtubule-associated protein 1B, isoform CRA_a;MAP1B protein;Putative uncharacterized protein DKFZp686F1345;MAP1B protein	MAP1B;hCG_37848;DKFZp686F1345;MAP1B	Microtubule-associated protein 1B;Uncharacterized protein;Uncharacterized protein;Uncharacterized protein	P46821;A2BDK6;A5D6X1;Q32NB7;Q4VBY4;Q5H9P1;Q6PJD3;Q86X89;D6RA32;Q05BW8;D6RGJ3;D6RCL2	0.294295	0	0.19044	-0.580684	0.0894383	97.02	0.294295	0	0.00376992	113.03	0.183891	-1.11938	3.71515e-05	123.05		1	S	NPAASTSPSLSHR	GSK3;Proline-directed	0.05	3.71515e-05	123.05	_(ac)ATVVVEATEPEPSGSIANPAApSTSPSLSHR_	ATVVVEATEPEPS(0.007)GS(0.007)IANPAAS(0.294)T(0.294)S(0.294)PS(0.045)LS(0.057)HR	AT(-65.76)VVVEAT(-40.17)EPEPS(-15.97)GS(-15.97)IANPAAS(0)T(0)S(0)PS(-8.11)LS(-7.15)HR	24	3	1028.82
201	112	1252	1252	Phosphoserine	249;1665	322;323;324;325;2099;2100	5358	9475	TSenrich-100ughela-2	16008	5351	9466	TSenrich-100ughela-1	13775	IPI00008868	IPI00008868	IPI00008868	MAP1 light chain LC1;Microtubule-associated protein 1B;Microtubule-associated protein 1B, isoform CRA_a;MAP1B protein;Putative uncharacterized protein DKFZp686F1345	MAP1B;hCG_37848;DKFZp686F1345	Microtubule-associated protein 1B	P46821;A2BDK6;A5D6X1;Q32NB7;Q4VBY4;Q5H9P1;Q6PJD3;Q86X89	0.92295	15.6368	0.000510635	-34.3416	8.43588e-11	157.06	0.92295	15.6368	8.99979e-07	138.64	0.00345926	-23.1996	0.0140779	103.6		2	S	VSSEKVSPSKSPS	CDK1;CDK2;CK1;GSK3;Proline-directed	0.0057	8.43588e-11	157.06	_VpSPSKSPSLSPSPPpSPLEK_	VS(0.923)PS(0.025)KS(0.025)PS(0.025)LS(0.001)PS(0.008)PPS(0.992)PLEK	VS(15.64)PS(-15.64)KS(-15.64)PS(-15.64)LS(-29.34)PS(-21.07)PPS(21.07)PLEK	2	3	694.325
202	112	1265	1265	Phosphoserine	249;1317;1665	322;323;324;325;1644;1645;2099;2100	5358	9475	TSenrich-100ughela-2	16008	4217	7600	TSenrich-100ughela-1	14456	IPI00008868	IPI00008868	IPI00008868	MAP1 light chain LC1;Microtubule-associated protein 1B;Microtubule-associated protein 1B, isoform CRA_a;MAP1B protein;Putative uncharacterized protein DKFZp686F1345	MAP1B;hCG_37848;DKFZp686F1345	Microtubule-associated protein 1B	P46821;A2BDK6;A5D6X1;Q32NB7;Q4VBY4;Q5H9P1;Q6PJD3;Q86X89	0.991787	21.0661	0.83501	8.91407	8.81458e-36	192.9	0.991787	21.0661	4.46975e-26	185.17	0.99587	23.7195	1.74002e-17	164.81		2	S	LSPSPPSPLEKTP	CK1;CK2;ERK/MAPK;Proline-directed;WW GroupIV	0.0023175	8.81458e-36	192.9	_VpSPSKSPSLSPSPPpSPLEK_	VS(0.923)PS(0.025)KS(0.025)PS(0.025)LS(0.001)PS(0.008)PPS(0.992)PLEK	VS(15.64)PS(-15.64)KS(-15.64)PS(-15.64)LS(-29.34)PS(-21.07)PPS(21.07)PLEK	15	3	694.325
203	112	1792	1792	Phosphoserine	358	468;469;470	1156	2006	TSenrich-100ughela-1	16959	1148	1996	TSenrich-100ughela-2	17778	IPI00008868	IPI00008868	IPI00008868	MAP1 light chain LC1;Microtubule-associated protein 1B;Microtubule-associated protein 1B, isoform CRA_a;MAP1B protein;Putative uncharacterized protein DKFZp686F1345	MAP1B;hCG_37848;DKFZp686F1345	Microtubule-associated protein 1B	P46821;A2BDK6;A5D6X1;Q32NB7;Q4VBY4;Q5H9P1;Q6PJD3;Q86X89	0.498393	0	0.498393	0	3.24485e-10	147.97	0.425695	-1.30385	1.34925e-10	155.56	0.439864	-1.05353	2.59442e-06	136.2		1	S	PLTPRESSPLYSP	CK1;PKA	0.042	1.34925e-10	155.56	_EpSSPLYSPTFSDSTSAVK_	ES(0.498)S(0.498)PLY(0.001)S(0.001)PTFSDSTSAVK	ES(0)S(0)PLY(-26.17)S(-29.75)PT(-33.15)FS(-30.24)DS(-32.43)T(-33.15)S(-33.15)AVK	2	2	991.935
204	112	1793	1793	Phosphoserine	358	468;469;470	1156	2006	TSenrich-100ughela-1	16959	1148	1996	TSenrich-100ughela-2	17778	IPI00008868	IPI00008868	IPI00008868	MAP1 light chain LC1;Microtubule-associated protein 1B;Microtubule-associated protein 1B, isoform CRA_a;MAP1B protein;Putative uncharacterized protein DKFZp686F1345	MAP1B;hCG_37848;DKFZp686F1345	Microtubule-associated protein 1B	P46821;A2BDK6;A5D6X1;Q32NB7;Q4VBY4;Q5H9P1;Q6PJD3;Q86X89	0.498393	0	0.498393	0	3.24485e-10	147.97	0.574305	1.30385	1.34925e-10	155.56	0.560132	1.05353	2.59442e-06	136.2		1	S	LTPRESSPLYSPT	CAMK2;GSK3;Polo box;Proline-directed	0.00405	1.34925e-10	155.56	_EpSSPLYSPTFSDSTSAVK_	ES(0.498)S(0.498)PLY(0.001)S(0.001)PTFSDSTSAVK	ES(0)S(0)PLY(-26.17)S(-29.75)PT(-33.15)FS(-30.24)DS(-32.43)T(-33.15)S(-33.15)AVK	3	2	991.935
205	112	831	831	Phosphoserine	1272	1583	4070	7392	TSenrich-100ughela-2	20321	4068	7390	TSenrich-100ughela-3	20478	IPI00008868	IPI00008868	IPI00008868	MAP1 light chain LC1;Microtubule-associated protein 1B;Microtubule-associated protein 1B, isoform CRA_a;MAP1B protein;Putative uncharacterized protein DKFZp686F1345	MAP1B;hCG_37848;DKFZp686F1345	Microtubule-associated protein 1B	P46821;A2BDK6;A5D6X1;Q32NB7;Q4VBY4;Q5H9P1;Q6PJD3;Q86X89	1	65.6525	1	76.7679	1.63375e-15	149.45	1	65.6525	1.9322e-15	147.35	1	101.735	9.43859e-33	185.74		2	S	AERSLMSSPEDLT	CK1;CK2	0.081	9.43859e-33	185.74	_SLMpSpSPEDLTK_	SLMS(1)S(1)PEDLTK	S(-78.65)LMS(65.65)S(74.66)PEDLT(-65.65)K	4	2	684.264
206	112	832	832	Phosphoserine	1272	1583	4070	7392	TSenrich-100ughela-2	20321	4068	7390	TSenrich-100ughela-3	20478	IPI00008868	IPI00008868	IPI00008868	MAP1 light chain LC1;Microtubule-associated protein 1B;Microtubule-associated protein 1B, isoform CRA_a;MAP1B protein;Putative uncharacterized protein DKFZp686F1345	MAP1B;hCG_37848;DKFZp686F1345	Microtubule-associated protein 1B	P46821;A2BDK6;A5D6X1;Q32NB7;Q4VBY4;Q5H9P1;Q6PJD3;Q86X89	1	74.6647	1	70.9646	1.63375e-15	149.45	1	74.6647	1.9322e-15	147.35	1	80.3541	9.43859e-33	185.74		2	S	ERSLMSSPEDLTK	CK1;CK2;NEK6;Polo box;Proline-directed	0.00405	9.43859e-33	185.74	_SLMpSpSPEDLTK_	SLMS(1)S(1)PEDLTK	S(-78.65)LMS(65.65)S(74.66)PEDLT(-65.65)K	5	2	684.264
207	112	1322	1322	Phosphoserine	1494	1884	4839	8621	TSenrich-100ughela-2	17110	4839	8621	TSenrich-100ughela-2	17110	IPI00008868	IPI00008868	IPI00008868	MAP1 light chain LC1;Microtubule-associated protein 1B;Microtubule-associated protein 1B, isoform CRA_a;MAP1B protein;Putative uncharacterized protein DKFZp686F1345	MAP1B;hCG_37848;DKFZp686F1345	Microtubule-associated protein 1B	P46821;A2BDK6;A5D6X1;Q32NB7;Q4VBY4;Q5H9P1;Q6PJD3;Q86X89	0.967614	14.7131					0.967614	14.7131	0.0844109	92.544	0.89216	10.6778	0.6562	65.075		5	S	KTLEVVSPSQSVT	ERK/MAPK;GSK3;Proline-directed	0.0034	0.0844109	92.544	_TLEVVpSPSQpSVpTGSAGHTPpYYQpSPTDEK_	T(0.001)LEVVS(0.968)PS(0.197)QS(0.63)VT(0.63)GS(0.58)AGHT(0.195)PY(0.558)Y(0.558)QS(0.556)PT(0.125)DEK	T(-30.22)LEVVS(14.71)PS(-7.52)QS(0.57)VT(0.57)GS(-0.57)AGHT(-6.45)PY(0)Y(0)QS(0.57)PT(-6.99)DEK	6	3	1122.42
208	112	1326	1326	Phosphoserine	1494	1884	4839	8621	TSenrich-100ughela-2	17110	4839	8621	TSenrich-100ughela-2	17110	IPI00008868	IPI00008868	IPI00008868	MAP1 light chain LC1;Microtubule-associated protein 1B;Microtubule-associated protein 1B, isoform CRA_a;MAP1B protein;Putative uncharacterized protein DKFZp686F1345	MAP1B;hCG_37848;DKFZp686F1345	Microtubule-associated protein 1B	P46821;A2BDK6;A5D6X1;Q32NB7;Q4VBY4;Q5H9P1;Q6PJD3;Q86X89	0.630362	0.566389					0.630362	0.566389	0.0844109	92.544	0.848969	15.0478	0.6562	65.075		5	S	VVSPSQSVTGSAG	CK1;GSK3	0.081	0.0844109	92.544	_TLEVVpSPSQpSVpTGSAGHTPpYYQpSPTDEK_	T(0.001)LEVVS(0.968)PS(0.197)QS(0.63)VT(0.63)GS(0.58)AGHT(0.195)PY(0.558)Y(0.558)QS(0.556)PT(0.125)DEK	T(-30.22)LEVVS(14.71)PS(-7.52)QS(0.57)VT(0.57)GS(-0.57)AGHT(-6.45)PY(0)Y(0)QS(0.57)PT(-6.99)DEK	10	3	1122.42
209	112	1339	1339	Phosphoserine	1494	1884	4839	8621	TSenrich-100ughela-2	17110	4839	8621	TSenrich-100ughela-2	17110	IPI00008868	IPI00008868	IPI00008868	MAP1 light chain LC1;Microtubule-associated protein 1B;Microtubule-associated protein 1B, isoform CRA_a;MAP1B protein;Putative uncharacterized protein DKFZp686F1345	MAP1B;hCG_37848;DKFZp686F1345	Microtubule-associated protein 1B	P46821;A2BDK6;A5D6X1;Q32NB7;Q4VBY4;Q5H9P1;Q6PJD3;Q86X89	0.55644	0.566389					0.55644	0.566389	0.0844109	92.544	0.408338	0.447061	0.6562	65.075		5	S	HTPYYQSPTDEKS	CK2;Proline-directed	0.05	0.0844109	92.544	_TLEVVpSPSQpSVpTGSAGHTPpYYQpSPTDEK_	T(0.001)LEVVS(0.968)PS(0.197)QS(0.63)VT(0.63)GS(0.58)AGHT(0.195)PY(0.558)Y(0.558)QS(0.556)PT(0.125)DEK	T(-30.22)LEVVS(14.71)PS(-7.52)QS(0.57)VT(0.57)GS(-0.57)AGHT(-6.45)PY(0)Y(0)QS(0.57)PT(-6.99)DEK	23	3	1122.42
210	112	1919	1919		1557	1968	5041	8930	TSenrich-100ughela-2	13040	5037	8922	TSenrich-100ughela-3	15812	IPI00008868	IPI00008868	IPI00008868	MAP1 light chain LC1;Microtubule-associated protein 1B;Microtubule-associated protein 1B, isoform CRA_a;MAP1B protein;Putative uncharacterized protein DKFZp686F1345	MAP1B;hCG_37848;DKFZp686F1345	Microtubule-associated protein 1B	P46821;A2BDK6;A5D6X1;Q32NB7;Q4VBY4;Q5H9P1;Q6PJD3;Q86X89	0.275991	0.806614	0.00149112	-28.2406	0.0346212	90.746	0.275991	0.806614	0.138729	72.971	0.979334	19.8312	0.0169296	108.8		1	S	TKSPSDSGYSYET	CK1	0.143	0.0169296	108.8	_TTKSPSDpSGYSYETIGK_	T(0.229)T(0.229)KS(0.229)PS(0.028)DS(0.276)GY(0.009)SYETIGK	T(-0.81)T(-0.81)KS(-0.81)PS(-9.99)DS(0.81)GY(-15.09)S(-33.06)Y(-43.61)ET(-46.98)IGK	8	3	634.279
211	112	1396	1396	Phosphoserine	1627	2051;2052	5226	9254	TSenrich-100ughela-2	27414	5225	9253	TSenrich-100ughela-2	27031	IPI00008868	IPI00008868	IPI00008868	MAP1 light chain LC1;Microtubule-associated protein 1B;Microtubule-associated protein 1B, isoform CRA_a;MAP1B protein;Putative uncharacterized protein DKFZp686F1345	MAP1B;hCG_37848;DKFZp686F1345	Microtubule-associated protein 1B	P46821;A2BDK6;A5D6X1;Q32NB7;Q4VBY4;Q5H9P1;Q6PJD3;Q86X89	0.999961	50.6774	1	67.9143	2.70868e-07	132.34	0.999961	50.6774	4.13588e-20	171.61	0.999966	47.3651	5.5956e-10	135.73		3	S	PIEKVLSPLRSPP	CDK1;CDK2;CHK1;ERK/MAPK;GSK3;PKD;Proline-directed	0.0034	4.13588e-20	171.61	_VLpSPLRpSPPLIGSESAYESFLpSADDK_	VLS(1)PLRS(1)PPLIGS(0.033)ES(0.029)AY(0.144)ES(0.144)FLS(0.651)ADDK	VLS(50.68)PLRS(40.78)PPLIGS(-12.94)ES(-13.54)AY(-6.56)ES(-6.56)FLS(6.56)ADDK	3	3	1006.78
212	112	1400	1400	Phosphoserine	1627	2051;2052	5226	9254	TSenrich-100ughela-2	27414	5225	9253	TSenrich-100ughela-2	27031	IPI00008868	IPI00008868	IPI00008868	MAP1 light chain LC1;Microtubule-associated protein 1B;Microtubule-associated protein 1B, isoform CRA_a;MAP1B protein;Putative uncharacterized protein DKFZp686F1345	MAP1B;hCG_37848;DKFZp686F1345	Microtubule-associated protein 1B	P46821;A2BDK6;A5D6X1;Q32NB7;Q4VBY4;Q5H9P1;Q6PJD3;Q86X89	0.999805	40.7762	0.999978	46.7249	2.70868e-07	132.34	0.999805	40.7762	4.13588e-20	171.61	0.999573	34.4741	5.5956e-10	135.73		3	S	VLSPLRSPPLIGS	CK1;Proline-directed	0.05	4.13588e-20	171.61	_VLpSPLRpSPPLIGSESAYESFLpSADDK_	VLS(1)PLRS(1)PPLIGS(0.033)ES(0.029)AY(0.144)ES(0.144)FLS(0.651)ADDK	VLS(50.68)PLRS(40.78)PPLIGS(-12.94)ES(-13.54)AY(-6.56)ES(-6.56)FLS(6.56)ADDK	7	3	1006.78
213	112	1415	1415		1627	2051;2052	5226	9254	TSenrich-100ughela-2	27414	5225	9253	TSenrich-100ughela-2	27031	IPI00008868	IPI00008868	IPI00008868	MAP1 light chain LC1;Microtubule-associated protein 1B;Microtubule-associated protein 1B, isoform CRA_a;MAP1B protein;Putative uncharacterized protein DKFZp686F1345	MAP1B;hCG_37848;DKFZp686F1345	Microtubule-associated protein 1B	P46821;A2BDK6;A5D6X1;Q32NB7;Q4VBY4;Q5H9P1;Q6PJD3;Q86X89	0.650867	6.56272	1.19552e-10	-99.9338	2.70868e-07	132.34	0.650867	6.56272	4.13588e-20	171.61	1.61503e-08	-81.1449	5.5956e-10	135.73		3	S	AYESFLSADDKAS	CK1;CK2	0.081	4.13588e-20	171.61	_VLpSPLRpSPPLIGSESAYESFLpSADDK_	VLS(1)PLRS(1)PPLIGS(0.033)ES(0.029)AY(0.144)ES(0.144)FLS(0.651)ADDK	VLS(50.68)PLRS(40.78)PPLIGS(-12.94)ES(-13.54)AY(-6.56)ES(-6.56)FLS(6.56)ADDK	22	3	1006.78
214	112	1779	1779	Phosphoserine	1655;1656	2085;2086;2087;2088;2089	5324	9416	TSenrich-100ughela-2	19165	5322	9413	TSenrich-100ughela-2	18124	IPI00008868	IPI00008868	IPI00008868	MAP1 light chain LC1;Microtubule-associated protein 1B;Microtubule-associated protein 1B, isoform CRA_a;MAP1B protein;Putative uncharacterized protein DKFZp686F1345	MAP1B;hCG_37848;DKFZp686F1345	Microtubule-associated protein 1B	P46821;A2BDK6;A5D6X1;Q32NB7;Q4VBY4;Q5H9P1;Q6PJD3;Q86X89	0.999974	49.1364	0.999957	46.7277	0.000483938	111.47	0.999974	49.1364	1.10781e-23	178.12	1	71.7702	2.79848e-08	141.08		2	S	LEGEKLSPKSDIS	CDK1;Proline-directed	0.0057	1.10781e-23	178.12	_VQSLEGEKLpSPKpSDISPLTPR_	VQSLEGEKLS(1)PKS(0.999)DIS(0.001)PLTPR	VQS(-54.55)LEGEKLS(49.14)PKS(28.56)DIS(-28.56)PLT(-48.35)PR	10	3	814.396
215	112	1782	1782	Phosphoserine	1656	2087;2088;2089	5324	9416	TSenrich-100ughela-2	19165	5322	9413	TSenrich-100ughela-2	18124	IPI00008868	IPI00008868	IPI00008868	MAP1 light chain LC1;Microtubule-associated protein 1B;Microtubule-associated protein 1B, isoform CRA_a;MAP1B protein;Putative uncharacterized protein DKFZp686F1345	MAP1B;hCG_37848;DKFZp686F1345	Microtubule-associated protein 1B	P46821;A2BDK6;A5D6X1;Q32NB7;Q4VBY4;Q5H9P1;Q6PJD3;Q86X89	0.998583	28.5574	0.993512	21.8983	0.000483938	111.47	0.998583	28.5574	1.10781e-23	178.12	1	96.2876	0.000814041	105.45		2	S	EKLSPKSDISPLT	CK1	0.081	1.10781e-23	178.12	_VQSLEGEKLpSPKpSDISPLTPR_	VQSLEGEKLS(1)PKS(0.999)DIS(0.001)PLTPR	VQS(-54.55)LEGEKLS(49.14)PKS(28.56)DIS(-28.56)PLT(-48.35)PR	13	3	814.396
216	112	1298	1298	Phosphoserine	1657	2090;2091	5330	9427	TSenrich-100ughela-2	18848	5330	9427	TSenrich-100ughela-2	18848	IPI00008868	IPI00008868	IPI00008868	MAP1 light chain LC1;Microtubule-associated protein 1B;Microtubule-associated protein 1B, isoform CRA_a;MAP1B protein;Putative uncharacterized protein DKFZp686F1345	MAP1B;hCG_37848;DKFZp686F1345	Microtubule-associated protein 1B	P46821;A2BDK6;A5D6X1;Q32NB7;Q4VBY4;Q5H9P1;Q6PJD3;Q86X89	0.999518	33.1052	0.95713	13.3683	6.77053e-06	128.2	0.999518	33.1052	6.51899e-15	150.98	0.18844	-5.19399	0.0180922	103.09		2	S	AEVAPVSPEVTQE	ERK/MAPK;Proline-directed;WW GroupIV	0.0023175	6.51899e-15	150.98	_VSAEAEVAPVpSPEVTQEVVEEHCApSPEDK_	VSAEAEVAPVS(1)PEVT(0.014)QEVVEEHCAS(0.986)PEDK	VS(-81.38)AEAEVAPVS(33.11)PEVT(-18.58)QEVVEEHCAS(18.58)PEDK	11	3	1094.8
217	112	1312	1312	Phosphoserine	1657	2090;2091	5330	9427	TSenrich-100ughela-2	18848	5330	9427	TSenrich-100ughela-2	18848	IPI00008868	IPI00008868	IPI00008868	MAP1 light chain LC1;Microtubule-associated protein 1B;Microtubule-associated protein 1B, isoform CRA_a;MAP1B protein;Putative uncharacterized protein DKFZp686F1345	MAP1B;hCG_37848;DKFZp686F1345	Microtubule-associated protein 1B	P46821;A2BDK6;A5D6X1;Q32NB7;Q4VBY4;Q5H9P1;Q6PJD3;Q86X89	0.986319	18.5769	0.509248	0	6.77053e-06	128.2	0.986319	18.5769	6.51899e-15	150.98	0.623119	5.19399	0.0180922	103.09		2	S	VEEHCASPEDKTL	CK2;Proline-directed	0.05	6.51899e-15	150.98	_VSAEAEVAPVpSPEVTQEVVEEHCApSPEDK_	VSAEAEVAPVS(1)PEVT(0.014)QEVVEEHCAS(0.986)PEDK	VS(-81.38)AEAEVAPVS(33.11)PEVT(-18.58)QEVVEEHCAS(18.58)PEDK	25	3	1094.8
218	113	491	491		365	478	1176	2049	TSenrich-100ughela-3	13066	1176	2049	TSenrich-100ughela-3	13066	IPI00883896;IPI00008918;IPI00796705;IPI00940308;IPI00796222;IPI00220466	IPI00883896	IPI00883896	Epithelial protein lost in neoplasm;LIM domain and actin-binding protein 1;Epithelial protein lost in neoplasm beta variant;Epithelial protein lost in neoplasm;LIM domain and actin-binding protein 1;Epithelial protein lost in neoplasm;LIM domain and actin-binding protein 1;cDNA FLJ38853 fis, clone MESAN2010321, highly similar to LIM domain and actin-binding protein 1;cDNA FLJ55990, highly similar…	EPLIN;LIMA1;PP624;SREBP3;EPLIN;LIMA1;PP624;SREBP3;EPLIN;LIMA1;PP624;SREBP3;EPLIN;LIMA1;PP624;SREBP3	Isoform 4 of LIM domain and actin-binding protein 1;Isoform Beta of LIM domain and actin-binding protein 1;cDNA FLJ55990, highly similar to LIM domain and actin-binding protein 1;LIM domain and actin-binding protein 1 isoform c;67 kDa protein;Isoform 3 of	Q9UHB6-4;Q9UHB6;Q53GG0;Q59FE8;Q9UHB6-1;Q9UHB6-2;B3KTW2;B4DN52;Q9UHB6-3	0.997075	25.3262									0.997075	25.3262	0.0227515	108.81		1	S	ARETPHSPGVEDA	ERK/MAPK;Proline-directed;WW GroupIV	0.0023175	0.0227515	108.81	_ETPHpSPGVEDAPIAK_	ET(0.003)PHS(0.997)PGVEDAPIAK	ET(-25.33)PHS(25.33)PGVEDAPIAK	5	2	814.372
219	113	363	363		1213	1506	3880	7075	TSenrich-100ughela-3	17936	3880	7075	TSenrich-100ughela-3	17936	IPI00883896;IPI00008918;IPI00796705;IPI00940308;IPI00796222;IPI00220466	IPI00883896	IPI00883896	Epithelial protein lost in neoplasm;LIM domain and actin-binding protein 1;Epithelial protein lost in neoplasm beta variant;Epithelial protein lost in neoplasm;LIM domain and actin-binding protein 1;Epithelial protein lost in neoplasm;LIM domain and actin-binding protein 1;cDNA FLJ38853 fis, clone MESAN2010321, highly similar to LIM domain and actin-binding protein 1;cDNA FLJ55990, highly similar…	EPLIN;LIMA1;PP624;SREBP3;EPLIN;LIMA1;PP624;SREBP3;EPLIN;LIMA1;PP624;SREBP3;EPLIN;LIMA1;PP624;SREBP3	Isoform 4 of LIM domain and actin-binding protein 1;Isoform Beta of LIM domain and actin-binding protein 1;cDNA FLJ55990, highly similar to LIM domain and actin-binding protein 1;LIM domain and actin-binding protein 1 isoform c;67 kDa protein;Isoform 3 of	Q9UHB6-4;Q9UHB6;Q53GG0;Q59FE8;Q9UHB6-1;Q9UHB6-2;B3KTW2;B4DN52;Q9UHB6-3	0.989669	19.8136									0.989669	19.8136	0.0554573	83.295		1	S	VHPKPLSPDSRAS	ERK/MAPK;Proline-directed;WW GroupIV	0.0023175	0.0554573	83.295	_SEVQQPVHPKPLpSPDSR_	SEVQQPVHPKPLS(0.99)PDS(0.01)R	S(-73.48)EVQQPVHPKPLS(19.81)PDS(-19.81)R	13	3	660.989
220	114	35	35	Phosphoserine	1167	1448	3762	6909	TSenrich-100ughela-3	12635	3762	6909	TSenrich-100ughela-3	12635	IPI00008986	IPI00008986	IPI00008986	4F2 light chain;CD98 light chain;Integral membrane protein E16;Large neutral amino acids transporter small subunit 1;L-type amino acid transporter 1;Solute carrier family 7 member 5;y+ system cationic amino acid transporter;Large neutral amino acids transporter 1;Solute carrier family 7 (Cationic amino acid transporter, y+ system), member 5	CD98LC;LAT1;MPE16;SLC7A5	Large neutral amino acids transporter small subunit 1	Q01650;Q2MCL6;Q8IV97	0.980502	17.0145									0.980502	17.0145	0.00158766	118.03		1	S	AKSADGSAPAGEG	CK1	0.143	0.00158766	118.03	_SADGpSAPAGEGEGVTLQR_	S(0.019)ADGS(0.981)APAGEGEGVTLQR	S(-17.01)ADGS(17.01)APAGEGEGVT(-78.67)LQR	5	2	891.389
221	115	124	124	Phosphoserine	394	514	1276	2214	TSenrich-100ughela-2	13459	1275	2213	TSenrich-100ughela-1	12623	IPI00009005;IPI00556379	IPI00009005	IPI00009005	Activating enhancer-binding protein 4;Class C basic helix-loop-helix protein 41;Transcription factor AP-4;TFAP4 protein;Transcription factor AP-4 (Activating enhancer binding protein 4) variant	BHLHC41;TFAP4	Transcription factor AP-4;Transcription factor AP-4 (Activating enhancer binding protein 4) variant (Fragment)	Q01664;Q6FHM5;Q59GG3	0.898931	9.52934	0.983738	17.8174	1.38121e-05	121.11	0.898931	9.52934	0.00858057	101.54						1	S	QELSGSSPKRRRA	CDK1;CDK2;CK1;Polo box;Proline-directed	0.00405	1.38121e-05	121.11	_FIQELSGSpSPK_	FIQELS(0.001)GS(0.1)S(0.899)PK	FIQELS(-30.06)GS(-9.53)S(9.53)PK	9	2	636.797
222	116	141	141	Phosphoserine	1693	2137	5445	9634	TSenrich-100ughela-1	18883	5444	9631	TSenrich-100ughela-3	20464	IPI00009057;IPI00179890;IPI00966366	IPI00009057	IPI00009057	GAP SH3 domain-binding protein 2;Ras GTPase-activating protein-binding protein 2;GAP SH3 domain-binding protein 2;Ras GTPase-activating protein-binding protein 2;cDNA FLJ76053, highly similar to Homo sapiens Ras-GTPase activating protein SH3 domain-binding protein 2 (G3BP2), transcript variant 3, mRNA	G3BP2;KIAA0660;G3BP2;KIAA0660	Isoform A of Ras GTPase-activating protein-binding protein 2;Isoform B of Ras GTPase-activating protein-binding protein 2;Uncharacterized protein	Q9UN86-1;Q9UN86;Q9UN86-2;A8K6V7;D6RB17	0.98156	17.2611	0.98156	17.2611	0.053147	97.331					0.99615	24.1285	1.39924e-05	120.59		2	S	DEVFGDSEPELDE	CK2	0.117	1.39924e-05	120.59	_YEDEVFGDpSEPELDEEpSEDEVEEEQEER_	Y(0.019)EDEVFGDS(0.982)EPELDEES(1)EDEVEEEQEER	Y(-17.26)EDEVFGDS(17.26)EPELDEES(41)EDEVEEEQEER	9	3	1184.09
223	116	149	149	Phosphoserine	1693	2137	5445	9634	TSenrich-100ughela-1	18883	5444	9631	TSenrich-100ughela-3	20464	IPI00009057;IPI00179890;IPI00966366	IPI00009057	IPI00009057	GAP SH3 domain-binding protein 2;Ras GTPase-activating protein-binding protein 2;GAP SH3 domain-binding protein 2;Ras GTPase-activating protein-binding protein 2;cDNA FLJ76053, highly similar to Homo sapiens Ras-GTPase activating protein SH3 domain-binding protein 2 (G3BP2), transcript variant 3, mRNA	G3BP2;KIAA0660;G3BP2;KIAA0660	Isoform A of Ras GTPase-activating protein-binding protein 2;Isoform B of Ras GTPase-activating protein-binding protein 2;Uncharacterized protein	Q9UN86-1;Q9UN86;Q9UN86-2;A8K6V7;D6RB17	0.999922	41.0031	0.999922	41.0031	0.053147	97.331					0.999999	61.4382	1.39924e-05	120.59		2	S	PELDEESEDEVEE	CK2	0.117	1.39924e-05	120.59	_YEDEVFGDpSEPELDEEpSEDEVEEEQEER_	Y(0.019)EDEVFGDS(0.982)EPELDEES(1)EDEVEEEQEER	Y(-17.26)EDEVFGDS(17.26)EPELDEES(41)EDEVEEEQEER	17	3	1184.09
224	117	131	131	Phosphoserine	1348	1690	4329	7752	TSenrich-100ughela-3	14857	4328	7751	TSenrich-100ughela-3	15291	IPI00074587;IPI00412643;IPI00009071;IPI00646643;IPI00386662;IPI00645384	IPI00074587	IPI00074587	40 kDa SR-repressor protein;FUS-interacting serine-arginine-rich protein 1;Splicing factor SRp38;Splicing factor, arginine/serine-rich 13A;TLS-associated protein with Ser-Arg repeats;TLS-associated serine-arginine protein;cDNA FLJ30749 fis, clone FEBRA2000402, highly similar to FUS-interacting serine-arginine-rich protein 1;cDNA FLJ43846 fis, clone TESTI4006393, highly similar to FUS-interacting …	FUSIP1;FUSIP2;SFRS13A;TASR;FUSIP1;FUSIP2;SFRS13A;TASR;FUSIP1;FUSIP2;SFRS13A;TASR;FUSIP1;RP11-4M23.6-005;FUSIP1;FUSIP2;SFRS13A;TASR;FUSIP1;RP11-4M23.6-014	Isoform 1 of Serine/arginine-rich splicing factor 10;Isoform 2 of Serine/arginine-rich splicing factor 10;Isoform 3 of Serine/arginine-rich splicing factor 10;FUS interacting protein (Serine/arginine-rich) 1;Isoform 4 of Serine/arginine-rich splicing facto	O75494-1;O75494;B3KNY6;Q53GD7;O75494-2;O75494-3;B4DJP9;Q5JRI3;O75494-4;Q5JRI1	0.995123	27.8546									0.995123	27.8546	0.011833	93.175		2	S	ERRRSRSRSFDYN	CAMK2;PKA/AKT	0.00111111	0.011833	93.175	_pSRpSFDYNYR_	S(0.995)RS(0.995)FDY(0.005)NY(0.005)R	S(27.85)RS(27.85)FDY(-27.85)NY(-27.85)R	1	3	456.499
225	117	133	133	Phosphoserine	1348	1690	4329	7752	TSenrich-100ughela-3	14857	4328	7751	TSenrich-100ughela-3	15291	IPI00074587;IPI00412643;IPI00009071;IPI00646643;IPI00386662;IPI00645384	IPI00074587	IPI00074587	40 kDa SR-repressor protein;FUS-interacting serine-arginine-rich protein 1;Splicing factor SRp38;Splicing factor, arginine/serine-rich 13A;TLS-associated protein with Ser-Arg repeats;TLS-associated serine-arginine protein;cDNA FLJ30749 fis, clone FEBRA2000402, highly similar to FUS-interacting serine-arginine-rich protein 1;cDNA FLJ43846 fis, clone TESTI4006393, highly similar to FUS-interacting …	FUSIP1;FUSIP2;SFRS13A;TASR;FUSIP1;FUSIP2;SFRS13A;TASR;FUSIP1;FUSIP2;SFRS13A;TASR;FUSIP1;RP11-4M23.6-005;FUSIP1;FUSIP2;SFRS13A;TASR;FUSIP1;RP11-4M23.6-014	Isoform 1 of Serine/arginine-rich splicing factor 10;Isoform 2 of Serine/arginine-rich splicing factor 10;Isoform 3 of Serine/arginine-rich splicing factor 10;FUS interacting protein (Serine/arginine-rich) 1;Isoform 4 of Serine/arginine-rich splicing facto	O75494-1;O75494;B3KNY6;Q53GD7;O75494-2;O75494-3;B4DJP9;Q5JRI3;O75494-4;Q5JRI1	0.995123	27.8546									0.995123	27.8546	0.011833	93.175		2	S	RRSRSRSFDYNYR	CAMK2;CK1;PKA/AKT	0.001764	0.011833	93.175	_pSRpSFDYNYR_	S(0.995)RS(0.995)FDY(0.005)NY(0.005)R	S(27.85)RS(27.85)FDY(-27.85)NY(-27.85)R	3	3	456.499
226	118	3161	3161	Phosphoserine	881	1109	2936	5501	TSenrich-100ughela-2	18146	2936	5501	TSenrich-100ughela-2	18146	IPI00444046;IPI00009101;IPI00550342;IPI00925446	IPI00444046	IPI00444046	Domino homolog 2;Helicase SRCAP;Snf2-related CBP activator;SRCAP protein;Domino homolog 2;Helicase SRCAP;Snf2-related CBP activator;Domino homolog 2;Helicase SRCAP;Snf2-related CBP activator	KIAA0309;SRCAP;KIAA0309;SRCAP;KIAA0309;SRCAP	Isoform 1 of Helicase SRCAP;Isoform 2 of Helicase SRCAP;Isoform 3 of Helicase SRCAP;326 kDa protein	Q6ZRS2-1;Q6ZRS2;Q6P4A2;Q6ZRS2-2;Q6ZRS2-3	0.975644	16.0162					0.975644	16.0162	0.00733441	115.92						3	S	GRLQPPSPLGPEG	ERK/MAPK;Proline-directed;WW GroupIV	0.0023175	0.00733441	115.92	_LQPPpSPLGPEGSVEEpSEAEApSGEEEEGDGTPR_	LQPPS(0.976)PLGPEGS(0.027)VEES(0.998)EAEAS(1)GEEEEGDGTPR	LQPPS(16.02)PLGPEGS(-16.02)VEES(26.04)EAEAS(42.45)GEEEEGDGT(-42.45)PR	5	3	1169.45
227	118	3172	3172	Phosphoserine	881	1109	2936	5501	TSenrich-100ughela-2	18146	2936	5501	TSenrich-100ughela-2	18146	IPI00444046;IPI00009101;IPI00550342;IPI00925446	IPI00444046	IPI00444046	Domino homolog 2;Helicase SRCAP;Snf2-related CBP activator;SRCAP protein;Domino homolog 2;Helicase SRCAP;Snf2-related CBP activator;Domino homolog 2;Helicase SRCAP;Snf2-related CBP activator	KIAA0309;SRCAP;KIAA0309;SRCAP;KIAA0309;SRCAP	Isoform 1 of Helicase SRCAP;Isoform 2 of Helicase SRCAP;Isoform 3 of Helicase SRCAP;326 kDa protein	Q6ZRS2-1;Q6ZRS2;Q6P4A2;Q6ZRS2-2;Q6ZRS2-3	0.997571	26.0385					0.997571	26.0385	0.00733441	115.92						3	S	EGSVEESEAEASG	CK1;CK2	0.117	0.00733441	115.92	_LQPPpSPLGPEGSVEEpSEAEApSGEEEEGDGTPR_	LQPPS(0.976)PLGPEGS(0.027)VEES(0.998)EAEAS(1)GEEEEGDGTPR	LQPPS(16.02)PLGPEGS(-16.02)VEES(26.04)EAEAS(42.45)GEEEEGDGT(-42.45)PR	16	3	1169.45
228	118	3177	3177	Phosphoserine	881	1109	2936	5501	TSenrich-100ughela-2	18146	2936	5501	TSenrich-100ughela-2	18146	IPI00444046;IPI00009101;IPI00550342;IPI00925446	IPI00444046	IPI00444046	Domino homolog 2;Helicase SRCAP;Snf2-related CBP activator;SRCAP protein;Domino homolog 2;Helicase SRCAP;Snf2-related CBP activator;Domino homolog 2;Helicase SRCAP;Snf2-related CBP activator	KIAA0309;SRCAP;KIAA0309;SRCAP;KIAA0309;SRCAP	Isoform 1 of Helicase SRCAP;Isoform 2 of Helicase SRCAP;Isoform 3 of Helicase SRCAP;326 kDa protein	Q6ZRS2-1;Q6ZRS2;Q6P4A2;Q6ZRS2-2;Q6ZRS2-3	0.999915	42.4467					0.999915	42.4467	0.00733441	115.92						3	S	ESEAEASGEEEEG	CK2	0.117	0.00733441	115.92	_LQPPpSPLGPEGSVEEpSEAEApSGEEEEGDGTPR_	LQPPS(0.976)PLGPEGS(0.027)VEES(0.998)EAEAS(1)GEEEEGDGTPR	LQPPS(16.02)PLGPEGS(-16.02)VEES(26.04)EAEAS(42.45)GEEEEGDGT(-42.45)PR	21	3	1169.45
229	118	3016	3016		970	1221	3183	5897	TSenrich-100ughela-2	17833	3183	5897	TSenrich-100ughela-2	17833	IPI00444046;IPI00009101;IPI00550342;IPI00925446	IPI00444046	IPI00444046	Domino homolog 2;Helicase SRCAP;Snf2-related CBP activator;SRCAP protein;Domino homolog 2;Helicase SRCAP;Snf2-related CBP activator;Domino homolog 2;Helicase SRCAP;Snf2-related CBP activator	KIAA0309;SRCAP;KIAA0309;SRCAP;KIAA0309;SRCAP	Isoform 1 of Helicase SRCAP;Isoform 2 of Helicase SRCAP;Isoform 3 of Helicase SRCAP;326 kDa protein	Q6ZRS2-1;Q6ZRS2;Q6P4A2;Q6ZRS2-2;Q6ZRS2-3	0.999905	40.2191	0.993354	21.7457	0.384631	56.121	0.999905	40.2191	0.0539954	87.121						1	S	PPKNPPSPRPSQL	CDK1;ERK/MAPK;GSK3;Proline-directed;WW GroupIV	0.0023175	0.0539954	87.121	_NPPpSPRPSQLPVLDR_	NPPS(1)PRPSQLPVLDR	NPPS(40.22)PRPS(-40.22)QLPVLDR	4	3	584.965
230	119	109	109	Phosphoserine; by LATS1 and LATS2	1021	1279	3295	6069	TSenrich-100ughela-3	13751	3294	6068	TSenrich-100ughela-3	13646	IPI00216919;IPI00956212;IPI00009326	IPI00216919	IPI00216919	65 kDa Yes-associated protein;Yorkie homolog;cDNA FLJ51091, highly similar to 65 kDa Yes-associated protein;cDNA, FLJ79015, highly similar to 65 kDa Yes-associated protein;Putative uncharacterized protein DKFZp451O0517;65 kDa Yes-associated protein;Yorkie homolog;65 kDa Yes-associated protein;Yorkie homolog;cDNA FLJ51192, highly similar to 65 kDa Yes-associated protein	YAP1;YAP65;DKFZp451O0517;YAP1;YAP65;YAP1;YAP65	Isoform 1 of Yorkie homolog;Isoform 2 of Yorkie homolog;Yes-associated protein beta	P46937-1;P46937;B4DTY1;B7ZA01;E3WEB6;Q86T74;P46937-2;P46937-3;B4E2Y3;E3WEB5	0.620118	2.13665									0.620118	2.13665	0.0144437	100.02		1	S	SHSRQASTDAGTA	CAMK2;CK1	0.042	0.0144437	100.02	_QApSTDAGTAGALTPQHVR_	QAS(0.62)T(0.379)DAGT(0.001)AGALTPQHVR	QAS(2.14)T(-2.14)DAGT(-30.9)AGALT(-34.33)PQHVR	3	2	930.934
231	120	95	95	Phosphoserine	460	592	1469	2517	TSenrich-100ughela-2	14820	1468	2516	TSenrich-100ughela-1	13576	IPI00009505;IPI00216631	IPI00009505	IPI00009505	59 kDa dystrophin-associated protein A1 basic component 2;Beta-2-syntrophin;Syntrophin-3;Syntrophin-like;Putative uncharacterized protein SNTB2;59 kDa dystrophin-associated protein A1 basic component 2;Beta-2-syntrophin;Syntrophin-3;Syntrophin-like	D16S2531E;SNT2B2;SNTB2;SNTL;D16S2531E;SNT2B2;SNTB2;SNTL	Isoform 1 of Beta-2-syntrophin;Isoform 2 of Beta-2-syntrophin	Q13425-1;Q13425;C9JMY8;Q13425-2	1	88.3079	1	108.054	9.86786e-09	108.05	1	88.3079	0.0305849	88.308	1	56.2795	0.330527	56.28		1	S	RGLGPPSPPAPPR	ERK/MAPK;Proline-directed;WW GroupIV	0.0023175	9.86786e-09	108.05	_GLGPPpSPPAPPR_	GLGPPS(1)PPAPPR	GLGPPS(88.31)PPAPPR	6	2	611.803
232	120	231	231		743	941	2476	4548	TSenrich-100ughela-2	23791	2474	4544	TSenrich-100ughela-1	22193	IPI00009505;IPI00216631;IPI00974473	IPI00009505	IPI00009505	59 kDa dystrophin-associated protein A1 basic component 2;Beta-2-syntrophin;Syntrophin-3;Syntrophin-like;Putative uncharacterized protein SNTB2;59 kDa dystrophin-associated protein A1 basic component 2;Beta-2-syntrophin;Syntrophin-3;Syntrophin-like	D16S2531E;SNT2B2;SNTB2;SNTL;D16S2531E;SNT2B2;SNTB2;SNTL	Isoform 1 of Beta-2-syntrophin;Isoform 2 of Beta-2-syntrophin;Protein	Q13425-1;Q13425;C9JMY8;Q13425-2	0.476502	0	0.492866	0	2.3295e-39	203.03	0.476502	0	2.21577e-37	193.09						1	S	FSGSEDSGSPKHQ	CK1	0.081	2.3295e-39	203.03	_KPSLVSDLPWEGAAPQSPSFSGSEDpSGSPK_	KPSLVSDLPWEGAAPQSPS(0.005)FS(0.021)GS(0.021)EDS(0.477)GS(0.477)PK	KPS(-161.18)LVS(-159.63)DLPWEGAAPQS(-59.95)PS(-20.16)FS(-13.52)GS(-13.52)EDS(0)GS(0)PK	26	3	1042.14
233	120	233	233	Phosphoserine	743	941	2476	4548	TSenrich-100ughela-2	23791	2474	4544	TSenrich-100ughela-1	22193	IPI00009505;IPI00216631;IPI00974473	IPI00009505	IPI00009505	59 kDa dystrophin-associated protein A1 basic component 2;Beta-2-syntrophin;Syntrophin-3;Syntrophin-like;Putative uncharacterized protein SNTB2;59 kDa dystrophin-associated protein A1 basic component 2;Beta-2-syntrophin;Syntrophin-3;Syntrophin-like	D16S2531E;SNT2B2;SNTB2;SNTL;D16S2531E;SNT2B2;SNTB2;SNTL	Isoform 1 of Beta-2-syntrophin;Isoform 2 of Beta-2-syntrophin;Protein	Q13425-1;Q13425;C9JMY8;Q13425-2	0.476502	0	0.492866	0	2.3295e-39	203.03	0.476502	0	2.21577e-37	193.09						1	S	GSEDSGSPKHQNS	CDK1;Proline-directed	0.0057	2.3295e-39	203.03	_KPSLVSDLPWEGAAPQSPSFSGSEDpSGSPK_	KPSLVSDLPWEGAAPQSPS(0.005)FS(0.021)GS(0.021)EDS(0.477)GS(0.477)PK	KPS(-161.18)LVS(-159.63)DLPWEGAAPQS(-59.95)PS(-20.16)FS(-13.52)GS(-13.52)EDS(0)GS(0)PK	28	3	1042.14
234	121	162	162	Phosphoserine	112	150	363	584	TSenrich-100ughela-3	12628	363	584	TSenrich-100ughela-3	12628	IPI00009542;IPI00477809;IPI00337823;IPI00941467;IPI00549529;IPI00910881;IPI00910470	IPI00009542	IPI00009542	11B6;Breast cancer-associated gene 1 protein;Hepatocellular carcinoma-associated protein JCL-1;MAGE-D2 antigen;Melanoma-associated antigen D2;Putative uncharacterized protein MAGED2;11B6;Breast cancer-associated gene 1 protein;Hepatocellular carcinoma-associated protein JCL-1;MAGE-D2 antigen;Melanoma-associated antigen D2;Melanoma antigen family D, 2;Melanoma antigen family D, 2;Melanoma antigen …	BCG1;MAGED2;MAGED2;BCG1;MAGED2;MAGED2;RP1-14O9.1-004;hCG_18665;MAGED2;RP1-14O9.1-005	Isoform 1 of Melanoma-associated antigen D2;Uncharacterized protein;Isoform 2 of Melanoma-associated antigen D2;Melanoma antigen family D, 2;Uncharacterized protein;cDNA FLJ58171, moderately similar to Melanoma-associated antigen D2;cDNA FLJ57753, highly s	Q9UNF1-1;Q9UNF1;C9JMB9;Q9UNF1-2;Q5H909;Q5H907;B4DX55;B4DNG7	0.946908	13.0336									0.946908	13.0336	7.10267e-14	158.36		1	S	ESAAAQSQENQDT			7.10267e-14	158.36	_AQETEAAPSQAPADEPEPESAAAQpSQENQDTRPK_	AQETEAAPSQAPADEPEPES(0.047)AAAQS(0.947)QENQDT(0.006)RPK	AQET(-109.33)EAAPS(-75.54)QAPADEPEPES(-13.03)AAAQS(13.03)QENQDT(-21.98)RPK	25	3	1220.2
235	122	48	48		1196	1486	3842	7020	TSenrich-100ughela-3	19309	3842	7020	TSenrich-100ughela-3	19309	IPI00009755;IPI00909630;IPI00908862	IPI00009755	IPI00009755	Methyltransferase-like protein 3;N6-adenosine-methyltransferase 70 kDa subunit;cDNA FLJ36190 fis, clone TESTI2027271, highly similar to N6-adenosine-methyltransferase 70 kDa subunit (EC 2.1.1.62);cDNA FLJ61069, highly similar to N6-adenosine-methyltransferase 70 kDa subunit(EC 2.1.1.62);cDNA FLJ58857, highly similar to N6-adenosine-methyltransferase 70 kDa subunit (EC 2.1.1.62);cDNA FLJ57780, hig…	METTL3;MTA70	Isoform 1 of N6-adenosine-methyltransferase 70 kDa subunit;cDNA FLJ58857, highly similar to N6-adenosine-methyltransferase 70 kDa subunit;cDNA FLJ57780, highly similar to N6-adenosine-methyltransferase 70 kDa subunit	Q86U44-1;Q86U44;B3KSH0;B4E2F6;B4DTN4;B4E349	0.481061	0									0.481061	0	0.0847847	103.2		1	S	LSPTFRSDSPVPT			0.0847847	103.2	_pSDSPVPTAPTSGGPKPSTASAVPELATDPELEK_	S(0.481)DS(0.481)PVPT(0.03)APT(0.002)S(0.002)GGPKPS(0.002)T(0.001)AS(0.001)AVPELATDPELEK	S(0)DS(0)PVPT(-12.01)APT(-23.82)S(-23.82)GGPKPS(-23.82)T(-28.38)AS(-27.36)AVPELAT(-66.87)DPELEK	1	3	1105.2
236	122	50	50		1196	1486	3842	7020	TSenrich-100ughela-3	19309	3842	7020	TSenrich-100ughela-3	19309	IPI00009755;IPI00909630;IPI00908862	IPI00009755	IPI00009755	Methyltransferase-like protein 3;N6-adenosine-methyltransferase 70 kDa subunit;cDNA FLJ36190 fis, clone TESTI2027271, highly similar to N6-adenosine-methyltransferase 70 kDa subunit (EC 2.1.1.62);cDNA FLJ61069, highly similar to N6-adenosine-methyltransferase 70 kDa subunit(EC 2.1.1.62);cDNA FLJ58857, highly similar to N6-adenosine-methyltransferase 70 kDa subunit (EC 2.1.1.62);cDNA FLJ57780, hig…	METTL3;MTA70	Isoform 1 of N6-adenosine-methyltransferase 70 kDa subunit;cDNA FLJ58857, highly similar to N6-adenosine-methyltransferase 70 kDa subunit;cDNA FLJ57780, highly similar to N6-adenosine-methyltransferase 70 kDa subunit	Q86U44-1;Q86U44;B3KSH0;B4E2F6;B4DTN4;B4E349	0.481061	0									0.481061	0	0.0847847	103.2		1	S	PTFRSDSPVPTAP	CAMK2;Proline-directed	0.042	0.0847847	103.2	_pSDSPVPTAPTSGGPKPSTASAVPELATDPELEK_	S(0.481)DS(0.481)PVPT(0.03)APT(0.002)S(0.002)GGPKPS(0.002)T(0.001)AS(0.001)AVPELATDPELEK	S(0)DS(0)PVPT(-12.01)APT(-23.82)S(-23.82)GGPKPS(-23.82)T(-28.38)AS(-27.36)AVPELAT(-66.87)DPELEK	3	3	1105.2
237	124	108	108	Phosphoserine	2	4	10	15	TSenrich-100ughela-1	21395	10	15	TSenrich-100ughela-1	21395	IPI00015147;IPI00641268;IPI00009975;IPI00218344;IPI00909393	IPI00015147	IPI00015147	Activating transcription factor 7;Cyclic AMP-dependent transcription factor ATF-7;Transcription factor ATF-A;cDNA, FLJ94063, highly similar to Homo sapiens activating transcription factor 7 (ATF7), mRNA;Activating transcription factor 7;Activating transcription factor 7, isoform CRA_b;Activating transcription factor 7;Cyclic AMP-dependent transcription factor ATF-7;Transcription factor ATF-A;Acti…	ATF7;ATFA;ATF7;hCG_23359;ATF7;ATFA;ATF7;ATFA;ATF7;ATFA	Isoform 3 of Cyclic AMP-dependent transcription factor ATF-7;cyclic AMP-dependent transcription factor ATF-7 isoform 2;Isoform 4 of Cyclic AMP-dependent transcription factor ATF-7;Isoform 2 of Cyclic AMP-dependent transcription factor ATF-7;Isoform 1 of Cy	P17544-1;P17544;B2R8U0;B2RMP1;P17544-4;P17544-3;P17544-2	0.977456	15.6109	0.977456	15.6109	7.31181e-45	173.38										2	S	AGPLDMSLPSTPD	NEK6;PLK1	0.033462	7.31181e-45	173.38	_AAAGPLDMpSLPSpTPDIK_	AAAGPLDMS(0.977)LPS(0.179)T(0.843)PDIK	AAAGPLDMS(15.61)LPS(-7.19)T(7.19)PDIK	9	2	922.401
238	124	127	127	Phosphoserine	635	804	2010	3535	TSenrich-100ughela-1	16086	2010	3535	TSenrich-100ughela-1	16086	IPI00015147;IPI00641268;IPI00009975;IPI00790068;IPI00909166	IPI00015147	IPI00015147	Activating transcription factor 7;Cyclic AMP-dependent transcription factor ATF-7;Transcription factor ATF-A;cDNA, FLJ94063, highly similar to Homo sapiens activating transcription factor 7 (ATF7), mRNA;Activating transcription factor 7;Activating transcription factor 7, isoform CRA_b;Activating transcription factor 7;Cyclic AMP-dependent transcription factor ATF-7;Transcription factor ATF-A;cDNA…	ATF7;ATFA;ATF7;hCG_23359;ATF7;ATFA	Isoform 3 of Cyclic AMP-dependent transcription factor ATF-7;cyclic AMP-dependent transcription factor ATF-7 isoform 2;Isoform 4 of Cyclic AMP-dependent transcription factor ATF-7;41 kDa protein;cDNA FLJ55305, highly similar to Cyclic AMP-dependent transcr	P17544-1;P17544;B2R8U0;B2RMP1;P17544-4;B4DZG5	0.99994	41.6351	0.99994	41.6351	0.00210838	109.45										5	S	EPVEVDSSPPDSP			0.00210838	109.45	_IKEEEPVEVDpSpSPPDpSPASpSPCpSPPLK_	IKEEEPVEVDS(1)S(1)PPDS(0.887)PAS(0.13)S(0.997)PCS(0.987)PPLK	IKEEEPVEVDS(41.64)S(41.64)PPDS(8.86)PAS(-8.86)S(24.41)PCS(18.16)PPLK	11	3	1093.4
239	124	128	128	Phosphoserine	635	804	2010	3535	TSenrich-100ughela-1	16086	2010	3535	TSenrich-100ughela-1	16086	IPI00015147;IPI00641268;IPI00009975;IPI00790068;IPI00909166	IPI00015147	IPI00015147	Activating transcription factor 7;Cyclic AMP-dependent transcription factor ATF-7;Transcription factor ATF-A;cDNA, FLJ94063, highly similar to Homo sapiens activating transcription factor 7 (ATF7), mRNA;Activating transcription factor 7;Activating transcription factor 7, isoform CRA_b;Activating transcription factor 7;Cyclic AMP-dependent transcription factor ATF-7;Transcription factor ATF-A;cDNA…	ATF7;ATFA;ATF7;hCG_23359;ATF7;ATFA	Isoform 3 of Cyclic AMP-dependent transcription factor ATF-7;cyclic AMP-dependent transcription factor ATF-7 isoform 2;Isoform 4 of Cyclic AMP-dependent transcription factor ATF-7;41 kDa protein;cDNA FLJ55305, highly similar to Cyclic AMP-dependent transcr	P17544-1;P17544;B2R8U0;B2RMP1;P17544-4;B4DZG5	0.99994	41.6351	0.99994	41.6351	0.00210838	109.45										5	S	PVEVDSSPPDSPA	CK2;GSK3;Polo box;Proline-directed	0.00405	0.00210838	109.45	_IKEEEPVEVDpSpSPPDpSPASpSPCpSPPLK_	IKEEEPVEVDS(1)S(1)PPDS(0.887)PAS(0.13)S(0.997)PCS(0.987)PPLK	IKEEEPVEVDS(41.64)S(41.64)PPDS(8.86)PAS(-8.86)S(24.41)PCS(18.16)PPLK	12	3	1093.4
240	124	132	132	Phosphoserine	635	804	2010	3535	TSenrich-100ughela-1	16086	2010	3535	TSenrich-100ughela-1	16086	IPI00015147;IPI00641268;IPI00009975;IPI00790068;IPI00909166	IPI00015147	IPI00015147	Activating transcription factor 7;Cyclic AMP-dependent transcription factor ATF-7;Transcription factor ATF-A;cDNA, FLJ94063, highly similar to Homo sapiens activating transcription factor 7 (ATF7), mRNA;Activating transcription factor 7;Activating transcription factor 7, isoform CRA_b;Activating transcription factor 7;Cyclic AMP-dependent transcription factor ATF-7;Transcription factor ATF-A;cDNA…	ATF7;ATFA;ATF7;hCG_23359;ATF7;ATFA	Isoform 3 of Cyclic AMP-dependent transcription factor ATF-7;cyclic AMP-dependent transcription factor ATF-7 isoform 2;Isoform 4 of Cyclic AMP-dependent transcription factor ATF-7;41 kDa protein;cDNA FLJ55305, highly similar to Cyclic AMP-dependent transcr	P17544-1;P17544;B2R8U0;B2RMP1;P17544-4;B4DZG5	0.886862	8.86064	0.886862	8.86064	0.00210838	109.45										5	S	DSSPPDSPASSPC	CK1;ERK/MAPK;GSK3;Proline-directed;WW GroupIV	0.0023175	0.00210838	109.45	_IKEEEPVEVDpSpSPPDpSPASpSPCpSPPLK_	IKEEEPVEVDS(1)S(1)PPDS(0.887)PAS(0.13)S(0.997)PCS(0.987)PPLK	IKEEEPVEVDS(41.64)S(41.64)PPDS(8.86)PAS(-8.86)S(24.41)PCS(18.16)PPLK	16	3	1093.4
241	124	136	136	Phosphoserine	635	804	2010	3535	TSenrich-100ughela-1	16086	2010	3535	TSenrich-100ughela-1	16086	IPI00015147;IPI00641268;IPI00009975;IPI00790068;IPI00909166	IPI00015147	IPI00015147	Activating transcription factor 7;Cyclic AMP-dependent transcription factor ATF-7;Transcription factor ATF-A;cDNA, FLJ94063, highly similar to Homo sapiens activating transcription factor 7 (ATF7), mRNA;Activating transcription factor 7;Activating transcription factor 7, isoform CRA_b;Activating transcription factor 7;Cyclic AMP-dependent transcription factor ATF-7;Transcription factor ATF-A;cDNA…	ATF7;ATFA;ATF7;hCG_23359;ATF7;ATFA	Isoform 3 of Cyclic AMP-dependent transcription factor ATF-7;cyclic AMP-dependent transcription factor ATF-7 isoform 2;Isoform 4 of Cyclic AMP-dependent transcription factor ATF-7;41 kDa protein;cDNA FLJ55305, highly similar to Cyclic AMP-dependent transcr	P17544-1;P17544;B2R8U0;B2RMP1;P17544-4;B4DZG5	0.996845	24.4066	0.996845	24.4066	0.00210838	109.45										5	S	PDSPASSPCSPPL	CK1;Polo box;Proline-directed	0.00405	0.00210838	109.45	_IKEEEPVEVDpSpSPPDpSPASpSPCpSPPLK_	IKEEEPVEVDS(1)S(1)PPDS(0.887)PAS(0.13)S(0.997)PCS(0.987)PPLK	IKEEEPVEVDS(41.64)S(41.64)PPDS(8.86)PAS(-8.86)S(24.41)PCS(18.16)PPLK	20	3	1093.4
242	124	139	139	Phosphoserine	635	804	2010	3535	TSenrich-100ughela-1	16086	2010	3535	TSenrich-100ughela-1	16086	IPI00015147;IPI00641268;IPI00009975;IPI00790068;IPI00909166	IPI00015147	IPI00015147	Activating transcription factor 7;Cyclic AMP-dependent transcription factor ATF-7;Transcription factor ATF-A;cDNA, FLJ94063, highly similar to Homo sapiens activating transcription factor 7 (ATF7), mRNA;Activating transcription factor 7;Activating transcription factor 7, isoform CRA_b;Activating transcription factor 7;Cyclic AMP-dependent transcription factor ATF-7;Transcription factor ATF-A;cDNA…	ATF7;ATFA;ATF7;hCG_23359;ATF7;ATFA	Isoform 3 of Cyclic AMP-dependent transcription factor ATF-7;cyclic AMP-dependent transcription factor ATF-7 isoform 2;Isoform 4 of Cyclic AMP-dependent transcription factor ATF-7;41 kDa protein;cDNA FLJ55305, highly similar to Cyclic AMP-dependent transcr	P17544-1;P17544;B2R8U0;B2RMP1;P17544-4;B4DZG5	0.986717	18.1636	0.986717	18.1636	0.00210838	109.45										5	S	PASSPCSPPLKEK	CK1;ERK/MAPK;Proline-directed;WW GroupIV	0.0023175	0.00210838	109.45	_IKEEEPVEVDpSpSPPDpSPASpSPCpSPPLK_	IKEEEPVEVDS(1)S(1)PPDS(0.887)PAS(0.13)S(0.997)PCS(0.987)PPLK	IKEEEPVEVDS(41.64)S(41.64)PPDS(8.86)PAS(-8.86)S(24.41)PCS(18.16)PPLK	23	3	1093.4
243	125	632	632	Phosphoserine; by CaMK4	119	159	392	627	TSenrich-100ughela-2	17930	390	624	TSenrich-100ughela-3	18150	IPI00010088	IPI00010088	IPI00010088	Histone deacetylase 4;cDNA FLJ51157, highly similar to Histone deacetylase 4;cDNA FLJ51174, highly similar to Histone deacetylase 4;cDNA FLJ59806, highly similar to Histone deacetylase 4;cDNA FLJ51177, highly similar to Histone deacetylase 4;Putative uncharacterized protein MGC16025;HDAC4 protein;Histone deacetylase 4, isoform CRA_a	HDAC4;KIAA0288;MGC16025;hCG_22188	Histone deacetylase 4	P56524;B7Z803;B7Z8G5;B7Z8I2;B7Z8L3;Q53SM2;Q86YH7	0.935246	11.6997	0.962119	14.0681	0.280522	71.707	0.935246	11.6997	0.104939	81.334	0.962791	14.1337	0.007157	98.962		1	S	PLSRAQSSPASAT	CAMK2;CHK1;CHK1/2;CK1;GSK3;PKD	0.003192	0.007157	98.962	_AQpSSPASATFPVSVQEPPTKPR_	AQS(0.935)S(0.063)PAS(0.001)AT(0.001)FPVSVQEPPTKPR	AQS(11.7)S(-11.7)PAS(-30.91)AT(-30.91)FPVS(-62.26)VQEPPT(-77.1)KPR	3	3	788.053
244	128	1202	1202		771	980	2584	4772	TSenrich-100ughela-3	13121	2584	4772	TSenrich-100ughela-3	13121	IPI00010200;IPI00968057	IPI00010200	IPI00010200	Probable ATP-dependent RNA helicase YTHDC2;cDNA FLJ16598 fis, clone TESTI4006473, weakly similar to ATP-dependent RNA helicase A	YTHDC2	Probable ATP-dependent RNA helicase YTHDC2;cDNA FLJ16598 fis, clone TESTI4006473, weakly similar to ATP-dependent RNA helicase A	Q9H6S0;Q6ZMY0	0.460002	0									0.460002	0	1.86785e-10	154.08		1	S	NNSRKSSADTEFS	CAMK2;CK1;PKA	0.004788	1.86785e-10	154.08	_KSpSADTEFSDECTTAER_	KS(0.08)S(0.46)ADT(0.46)EFSDECTTAER	KS(-7.6)S(0)ADT(0)EFS(-39.08)DECT(-77.15)T(-100.46)AER	3	3	671.93
245	129	1105	1105	Phosphoserine	1462	1842	4730	8392	TSenrich-100ughela-2	26067	4730	8392	TSenrich-100ughela-2	26067	IPI00010252;IPI00221114;IPI00748247	IPI00010252	IPI00010252	E3 ubiquitin-protein ligase TRIM33;Ectodermin homolog;RET-fused gene 7 protein;Transcription intermediary factor 1-gamma;Tripartite motif-containing protein 33;E3 ubiquitin-protein ligase TRIM33;Ectodermin homolog;RET-fused gene 7 protein;Transcription intermediary factor 1-gamma;Tripartite motif-containing protein 33;cDNA FLJ13372 fis, clone PLACE1000706, highly similar to Transcription intermed…	KIAA1113;RFG7;TIF1G;TRIM33;KIAA1113;RFG7;TIF1G;TRIM33	Isoform Alpha of E3 ubiquitin-protein ligase TRIM33;Isoform Beta of E3 ubiquitin-protein ligase TRIM33;cDNA FLJ13372 fis, clone PLACE1000706, highly similar to Transcription intermediary factor 1-gamma	Q9UPN9-1;Q9UPN9;Q9UPN9-2;B3KN30;B4DXI9;Q9HAL0	1	72.9733	0.982142	17.3269	0.443396	80.015	1	72.9733	5.21763e-10	144.17	0.999645	34.5001	0.317093	84.145		2	S	GEVTEDSDEDFIQ	CK2	0.117	5.21763e-10	144.17	_TFAPLPEFEQEEDDGEVpTEDpSDEDFIQPR_	TFAPLPEFEQEEDDGEVT(1)EDS(1)DEDFIQPR	T(-68.34)FAPLPEFEQEEDDGEVT(68.34)EDS(72.97)DEDFIQPR	21	3	1182.13
246	130	346	346		1169	1451	3766	6915	TSenrich-100ughela-3	11909	3766	6915	TSenrich-100ughela-3	11909	IPI00883925;IPI00796038;IPI00434965;IPI00877018;IPI00434966;IPI00792543;IPI00010276	IPI00883925	IPI00883925	FLJ00169 protein;ADP-ribosylation factor-like protein 6-interacting protein 4;HSP-975;HSVI-binding protein;SR-15;SRp25;ADP-ribosylation factor-like protein 6-interacting protein 4;HSP-975;HSVI-binding protein;SR-15;SRp25;ADP-ribosylation factor-like protein 6-interacting protein 4;HSP-975;HSVI-binding protein;SR-15;SRp25;cDNA, FLJ96871, highly similar to Homo sapiens ADP-ribosylation-like factor …	FLJ00169;ARL6IP4;ARL6IP4;ARL6IP4;ARL6IP4	ADP-ribosylation factor-like protein 6-interacting protein 4;SRp25 nuclear protein isoform 1;Isoform 2 of ADP-ribosylation factor-like protein 6-interacting protein 4;Isoform 3 of ADP-ribosylation factor-like protein 6-interacting protein 4;Isoform 4 of AD	Q8TEM4;Q66PJ3-1;Q66PJ3;Q66PJ3-2;Q66PJ3-3;B2RE15;B3V0L0;B3V0L1;Q66PJ3-4	1	169.445									1	169.445	2.53147e-94	247.61		1	S	LDQWHRSAGEEED	CK2	0.117	2.53147e-94	247.61	_pSAGEEEDGPVLTDEQK_	S(1)AGEEEDGPVLTDEQK	S(169.45)AGEEEDGPVLT(-169.45)DEQK	1	2	892.367
247	131	44	44	Phosphoserine	836	1058	2806	5268	TSenrich-100ughela-2	21398	2805	5265	TSenrich-100ughela-2	20742	IPI00010463;IPI00879901	IPI00010463	IPI00010463	GTP-binding protein 1;cDNA, FLJ96803, highly similar to Homo sapiens GTP binding protein 1 (GTPBP1), mRNA	GTPBP1	GTP-binding protein 1;7 kDa protein	O00178;B2RDW9	1	65.7533	1	126.766	1.32661e-20	173.5	1	65.7533	4.41761e-26	177.33	1	126.292	8.7335e-20	164.94		2	S	LHGGFDSDCSEDG			4.41761e-26	177.33	_LHGGFDpSDCpSEDGEALNGEPELDLTSK_	LHGGFDS(1)DCS(1)EDGEALNGEPELDLTSK	LHGGFDS(65.75)DCS(63.95)EDGEALNGEPELDLT(-63.95)S(-64.22)K	7	3	1018.06
248	131	47	47	Phosphoserine	836	1058	2806	5268	TSenrich-100ughela-2	21398	2805	5265	TSenrich-100ughela-2	20742	IPI00010463;IPI00879901	IPI00010463	IPI00010463	GTP-binding protein 1;cDNA, FLJ96803, highly similar to Homo sapiens GTP binding protein 1 (GTPBP1), mRNA	GTPBP1	GTP-binding protein 1;7 kDa protein	O00178;B2RDW9	0.999999	63.9454	1	126.531	1.32661e-20	173.5	0.999999	63.9454	4.41761e-26	177.33	1	126.292	8.7335e-20	164.94		2	S	GFDSDCSEDGEAL	CK1	0.081	4.41761e-26	177.33	_LHGGFDpSDCpSEDGEALNGEPELDLTSK_	LHGGFDS(1)DCS(1)EDGEALNGEPELDLTSK	LHGGFDS(65.75)DCS(63.95)EDGEALNGEPELDLT(-63.95)S(-64.22)K	10	3	1018.06
249	132	300	300	Phosphoserine	516	668	1683	2854	TSenrich-100ughela-2	23125	1681	2852	TSenrich-100ughela-3	23140	IPI00010544;IPI00643168;IPI00654613	IPI00010544	IPI00010544	Protein incorporated later into tight junctions;Tight junction protein 4;Tight junction-associated protein 1;Protein incorporated later into tight junctions;Tight junction protein 4;Tight junction-associated protein 1;cDNA FLJ37588 fis, clone BRCOC2006189, highly similar to Tight junction-associated protein 1;cDNA FLJ45409 fis, clone BRHIP3032148, highly similar to Tight junction-associated prote…	PILT;TJAP1;TJP4;PILT;TJAP1;TJP4;hCG_1641883;PILT;TJAP1;TJP4	Isoform 1 of Tight junction-associated protein 1;Isoform 2 of Tight junction-associated protein 1;Isoform 4 of Tight junction-associated protein 1	Q5JTD0-1;Q5JTD0;Q5JTD0-2;B3KT40;Q5JTD0-4	1	105.649	1	97.7569	1.98296e-06	97.757	1	105.649	0.0259305	105.65	1	148.573	4.13897e-11	148.57		1	S	LGTARGSPEEELP	CK1;CK2;PKA;Proline-directed	0.042	4.13897e-11	148.57	_GpSPEEELPLPAFEK_	GS(1)PEEELPLPAFEK	GS(105.65)PEEELPLPAFEK	2	2	811.871
250	132	545	545	Phosphoserine	683	861	2144	3739	TSenrich-100ughela-2	15406	2143	3738	TSenrich-100ughela-1	14067	IPI00010544;IPI00643168;IPI00654613	IPI00010544	IPI00010544	Protein incorporated later into tight junctions;Tight junction protein 4;Tight junction-associated protein 1;Protein incorporated later into tight junctions;Tight junction protein 4;Tight junction-associated protein 1;cDNA FLJ37588 fis, clone BRCOC2006189, highly similar to Tight junction-associated protein 1;cDNA FLJ45409 fis, clone BRHIP3032148, highly similar to Tight junction-associated prote…	PILT;TJAP1;TJP4;PILT;TJAP1;TJP4;hCG_1641883;PILT;TJAP1;TJP4	Isoform 1 of Tight junction-associated protein 1;Isoform 2 of Tight junction-associated protein 1;Isoform 4 of Tight junction-associated protein 1	Q5JTD0-1;Q5JTD0;Q5JTD0-2;B3KT40;Q5JTD0-4	0.995334	23.2901	0.999501	33.018	3.74504e-11	158.65	0.995334	23.2901	4.00951e-11	158.48	0.999255	31.2753	1.62195e-06	142.21		1	S	HLHRKDSLTQAQE	AURORA;AURORA-1;AURORA-A;CAMK2;CHK1;CHK1/2;PKA;PKD	0.003192	3.74504e-11	158.65	_KDpSLTQAQEQGNLLN_	KDS(0.995)LT(0.005)QAQEQGNLLN	KDS(23.29)LT(-23.29)QAQEQGNLLN	3	2	869.904
251	133	454	454		1076	1338	3447	6307	TSenrich-100ughela-2	16791	3447	6307	TSenrich-100ughela-2	16791	IPI00218424;IPI00218417;IPI00942110;IPI00010680;IPI00216605;IPI00218416;IPI00216603;IPI00218418;IPI00218423;IPI00218419;IPI00910530;IPI00383509;IPI00377178;IPI00643986	IPI00218424	IPI00218424	Fibroblast growth factor receptor 2 (Bacteria-expressed kinase, keratinocyte growth factor receptor, craniofacial dysostosis 1, Crouzon syndrome, Pfeiffer syndrome, Jackson-Weiss syndrome), isoform CRA_e;Fibroblast growth factor receptor 2;Keratinocyte growth factor receptor;K-sam;Fibroblast growth factor receptor 2;Keratinocyte growth factor receptor;K-sam;Fibroblast growth factor receptor 2;Ker…	FGFR2;hCG_1811153;BEK;FGFR2;KGFR;KSAM;BEK;FGFR2;KGFR;KSAM;BEK;FGFR2;KGFR;KSAM;BEK;FGFR2;KGFR;KSAM;BEK;FGFR2;KGFR;KSAM;BEK;FGFR2;KGFR;KSAM;BEK;FGFR2;KGFR;KSAM;BEK;FGFR2;KGFR;KSAM;BEK;FGFR2;KGFR;KSAM;FGFR2 AT-I	Fibroblast growth factor receptor 2 (Bacteria-expressed kinase, keratinocyte growth factor receptor, craniofacial dysostosis 1, Crouzon syndrome, Pfeiffer syndrome, Jackson-Weiss syndrome), isoform CRA_e;Isoform 11 of Fibroblast growth factor receptor 2;Is	D3DRE0;P21802-11;P21802;P21802-3;P21802-1;P21802-9;P21802-10;P21802-7;P21802-12;P21802-17;P21802-13;B4DFC2;Q8IXC7	0.490011	0					0.490011	0	0.0126009	91.541						3	S	VTVSAESSSSMNS	CK1	0.081	0.0126009	91.541	_QVpTVSAEpSSSpSMNSNTPLVR_	QVT(0.996)VS(0.018)AES(0.49)S(0.49)S(0.024)S(0.97)MNS(0.009)NT(0.002)PLVR	QVT(24.19)VS(-15.31)AES(0)S(0)S(-17.15)S(17.15)MNS(-20.48)NT(-27.54)PLVR	8	3	778.642
252	133	455	455		1076	1338	3447	6307	TSenrich-100ughela-2	16791	3447	6307	TSenrich-100ughela-2	16791	IPI00218424;IPI00218417;IPI00942110;IPI00010680;IPI00216605;IPI00218416;IPI00216603;IPI00218418;IPI00218423;IPI00218419;IPI00910530;IPI00383509;IPI00377178;IPI00643986	IPI00218424	IPI00218424	Fibroblast growth factor receptor 2 (Bacteria-expressed kinase, keratinocyte growth factor receptor, craniofacial dysostosis 1, Crouzon syndrome, Pfeiffer syndrome, Jackson-Weiss syndrome), isoform CRA_e;Fibroblast growth factor receptor 2;Keratinocyte growth factor receptor;K-sam;Fibroblast growth factor receptor 2;Keratinocyte growth factor receptor;K-sam;Fibroblast growth factor receptor 2;Ker…	FGFR2;hCG_1811153;BEK;FGFR2;KGFR;KSAM;BEK;FGFR2;KGFR;KSAM;BEK;FGFR2;KGFR;KSAM;BEK;FGFR2;KGFR;KSAM;BEK;FGFR2;KGFR;KSAM;BEK;FGFR2;KGFR;KSAM;BEK;FGFR2;KGFR;KSAM;BEK;FGFR2;KGFR;KSAM;BEK;FGFR2;KGFR;KSAM;FGFR2 AT-I	Fibroblast growth factor receptor 2 (Bacteria-expressed kinase, keratinocyte growth factor receptor, craniofacial dysostosis 1, Crouzon syndrome, Pfeiffer syndrome, Jackson-Weiss syndrome), isoform CRA_e;Isoform 11 of Fibroblast growth factor receptor 2;Is	D3DRE0;P21802-11;P21802;P21802-3;P21802-1;P21802-9;P21802-10;P21802-7;P21802-12;P21802-17;P21802-13;B4DFC2;Q8IXC7	0.490011	0					0.490011	0	0.0126009	91.541						3	S	TVSAESSSSMNSN	CK1	0.143	0.0126009	91.541	_QVpTVSAEpSSSpSMNSNTPLVR_	QVT(0.996)VS(0.018)AES(0.49)S(0.49)S(0.024)S(0.97)MNS(0.009)NT(0.002)PLVR	QVT(24.19)VS(-15.31)AES(0)S(0)S(-17.15)S(17.15)MNS(-20.48)NT(-27.54)PLVR	9	3	778.642
253	133	457	457		1076	1338	3447	6307	TSenrich-100ughela-2	16791	3447	6307	TSenrich-100ughela-2	16791	IPI00218424;IPI00218417;IPI00942110;IPI00010680;IPI00216605;IPI00218416;IPI00216603;IPI00218418;IPI00218423;IPI00218419;IPI00910530;IPI00383509;IPI00377178;IPI00643986	IPI00218424	IPI00218424	Fibroblast growth factor receptor 2 (Bacteria-expressed kinase, keratinocyte growth factor receptor, craniofacial dysostosis 1, Crouzon syndrome, Pfeiffer syndrome, Jackson-Weiss syndrome), isoform CRA_e;Fibroblast growth factor receptor 2;Keratinocyte growth factor receptor;K-sam;Fibroblast growth factor receptor 2;Keratinocyte growth factor receptor;K-sam;Fibroblast growth factor receptor 2;Ker…	FGFR2;hCG_1811153;BEK;FGFR2;KGFR;KSAM;BEK;FGFR2;KGFR;KSAM;BEK;FGFR2;KGFR;KSAM;BEK;FGFR2;KGFR;KSAM;BEK;FGFR2;KGFR;KSAM;BEK;FGFR2;KGFR;KSAM;BEK;FGFR2;KGFR;KSAM;BEK;FGFR2;KGFR;KSAM;BEK;FGFR2;KGFR;KSAM;FGFR2 AT-I	Fibroblast growth factor receptor 2 (Bacteria-expressed kinase, keratinocyte growth factor receptor, craniofacial dysostosis 1, Crouzon syndrome, Pfeiffer syndrome, Jackson-Weiss syndrome), isoform CRA_e;Isoform 11 of Fibroblast growth factor receptor 2;Is	D3DRE0;P21802-11;P21802;P21802-3;P21802-1;P21802-9;P21802-10;P21802-7;P21802-12;P21802-17;P21802-13;B4DFC2;Q8IXC7	0.970437	17.1461					0.970437	17.1461	0.0126009	91.541						3	S	SAESSSSMNSNTP	CK1	0.081	0.0126009	91.541	_QVpTVSAEpSSSpSMNSNTPLVR_	QVT(0.996)VS(0.018)AES(0.49)S(0.49)S(0.024)S(0.97)MNS(0.009)NT(0.002)PLVR	QVT(24.19)VS(-15.31)AES(0)S(0)S(-17.15)S(17.15)MNS(-20.48)NT(-27.54)PLVR	11	3	778.642
254	134	342	342	Phosphoserine	847	1069	2836	5347	TSenrich-100ughela-3	24350	2836	5347	TSenrich-100ughela-3	24350	IPI00010700;IPI00893120;IPI00893641;IPI00894143;IPI00964044;IPI00642817;IPI00953633;IPI00941272;IPI00942384;IPI00942936;IPI00940401;IPI00854786;IPI00943144;IPI00939397;IPI00952705;IPI00940543;IPI00084746;IPI00943318;IPI00941514;IPI00942314;IPI00940875;IPI00940155;IPI00939969;IPI00885161;IPI00941298;IPI00940175	IPI00010700	IPI00010700	HLA-B-associated transcript 2;Large proline-rich protein BAT2;Protein G2;cDNA FLJ56600, highly similar to Large proline-rich protein BAT2;cDNA FLJ56925, highly similar to Large proline-rich protein BAT2;HLA-B-associated transcript 2;Large proline-rich protein BAT2;Protein G2;Putative uncharacterized protein BAT2;Putative uncharacterized protein ENSP00000404184;Putative uncharacterized protein ENS…	BAT2;G2;BAT2;G2;BAT2;BAT2;BAT2;G2;BAT2;BAT2;G2	Isoform 1 of Large proline-rich protein BAT2;229 kDa protein;229 kDa protein;229 kDa protein;229 kDa protein;Isoform 3 of Large proline-rich protein BAT2;Uncharacterized protein;Uncharacterized protein;Uncharacterized protein;Uncharacterized protein;Unchar	P48634-1;P48634;B4DLY2;B4DQ12;P48634-3;C9JD87;C9JI93;C9JI26;C9JTL3;C9JXZ3;A6NG23;C9JAS0;C9JI89;C9J8K3;C9JM53;P48634-2;C9JB33;C9J1F6;C9J6L0;C9JTM3;C9J9U2;C9JAP8;P48634-4;B4DZ56;C9JXK4	1	88.4047									1	88.4047	0.0326303	88.405		2	S	TEKLKFSDEEDGR	CK2;NEK6	0.076	0.0326303	88.405	_LKFpSDEEDGRDpSDEEGAEGHR_	LKFS(1)DEEDGRDS(1)DEEGAEGHR	LKFS(88.4)DEEDGRDS(88.4)DEEGAEGHR	4	3	846.653
255	134	350	350	Phosphoserine	847	1069	2836	5347	TSenrich-100ughela-3	24350	2836	5347	TSenrich-100ughela-3	24350	IPI00010700;IPI00893120;IPI00893641;IPI00894143;IPI00964044;IPI00642817;IPI00953633;IPI00941272;IPI00942384;IPI00942936;IPI00940401;IPI00854786;IPI00943144;IPI00939397;IPI00952705;IPI00940543;IPI00084746;IPI00943318;IPI00941514;IPI00942314;IPI00940875;IPI00940155;IPI00939969;IPI00885161;IPI00941298;IPI00940175	IPI00010700	IPI00010700	HLA-B-associated transcript 2;Large proline-rich protein BAT2;Protein G2;cDNA FLJ56600, highly similar to Large proline-rich protein BAT2;cDNA FLJ56925, highly similar to Large proline-rich protein BAT2;HLA-B-associated transcript 2;Large proline-rich protein BAT2;Protein G2;Putative uncharacterized protein BAT2;Putative uncharacterized protein ENSP00000404184;Putative uncharacterized protein ENS…	BAT2;G2;BAT2;G2;BAT2;BAT2;BAT2;G2;BAT2;BAT2;G2	Isoform 1 of Large proline-rich protein BAT2;229 kDa protein;229 kDa protein;229 kDa protein;229 kDa protein;Isoform 3 of Large proline-rich protein BAT2;Uncharacterized protein;Uncharacterized protein;Uncharacterized protein;Uncharacterized protein;Unchar	P48634-1;P48634;B4DLY2;B4DQ12;P48634-3;C9JD87;C9JI93;C9JI26;C9JTL3;C9JXZ3;A6NG23;C9JAS0;C9JI89;C9J8K3;C9JM53;P48634-2;C9JB33;C9J1F6;C9J6L0;C9JTM3;C9J9U2;C9JAP8;P48634-4;B4DZ56;C9JXK4	1	88.4047									1	88.4047	0.0326303	88.405		2	S	EEDGRDSDEEGAE	CK2;PKA	0.042	0.0326303	88.405	_LKFpSDEEDGRDpSDEEGAEGHR_	LKFS(1)DEEDGRDS(1)DEEGAEGHR	LKFS(88.4)DEEDGRDS(88.4)DEEGAEGHR	12	3	846.653
256	134	1089	1089	Phosphoserine	1436	1809;1810	4655	8280	TSenrich-100ughela-1	12057	4653	8276	TSenrich-100ughela-3	14684	IPI00010700;IPI00893120;IPI00893641;IPI00894143;IPI00964044	IPI00010700	IPI00010700	HLA-B-associated transcript 2;Large proline-rich protein BAT2;Protein G2;cDNA FLJ56600, highly similar to Large proline-rich protein BAT2;cDNA FLJ56925, highly similar to Large proline-rich protein BAT2	BAT2;G2	Isoform 1 of Large proline-rich protein BAT2;229 kDa protein;229 kDa protein;229 kDa protein;229 kDa protein	P48634-1;P48634;B4DLY2;B4DQ12	0.302425	0	0.302425	0	0.545102	50.626					0.898991	9.46681	0.0313879	94.563		2	S	TASETRSEGSEYE	CK1	0.143	0.0313879	94.563	_TASEpTRSEGSEpYEEIPK_	T(0.252)AS(0.252)ET(0.253)RS(0.302)EGS(0.123)EY(0.818)EEIPK	T(-0.55)AS(-0.55)ET(0)RS(0)EGS(-8.22)EY(8.22)EEIPK	7	2	1036.91
257	136	1409	1409	Phosphoserine	200	262	658	1164	TSenrich-100ughela-3	14031	658	1164	TSenrich-100ughela-3	14031	IPI00010800	IPI00010800	IPI00010800	Nestin;Nestin, isoform CRA_c;NES protein	Nbla00170;NES;hCG_1999207	Nestin	P48681;D3DVC4;Q2YDX4	1	162.044									1	162.044	7.92486e-21	162.04		2	S	WDRDGESDGFADE			7.92486e-21	162.04	_DGEpSDGFADEEEpSGEEGEEDQEEGREPGAGR_	DGES(1)DGFADEEES(1)GEEGEEDQEEGREPGAGR	DGES(162.04)DGFADEEES(162.04)GEEGEEDQEEGREPGAGR	4	3	1153.4
258	136	1418	1418	Phosphoserine	200	262	658	1164	TSenrich-100ughela-3	14031	658	1164	TSenrich-100ughela-3	14031	IPI00010800	IPI00010800	IPI00010800	Nestin;Nestin, isoform CRA_c;NES protein	Nbla00170;NES;hCG_1999207	Nestin	P48681;D3DVC4;Q2YDX4	1	162.044									1	162.044	7.92486e-21	162.04		2	S	FADEEESGEEGEE	CK2	0.117	7.92486e-21	162.04	_DGEpSDGFADEEEpSGEEGEEDQEEGREPGAGR_	DGES(1)DGFADEEES(1)GEEGEEDQEEGREPGAGR	DGES(162.04)DGFADEEES(162.04)GEEGEEDQEEGREPGAGR	13	3	1153.4
259	136	680	680	Phosphoserine	337	441	1089	1875	TSenrich-100ughela-1	19676	1089	1875	TSenrich-100ughela-1	19676	IPI00010800	IPI00010800	IPI00010800	Nestin;Nestin, isoform CRA_c;NES protein	Nbla00170;NES;hCG_1999207	Nestin	P48681;D3DVC4;Q2YDX4	1	111.647	1	111.647	0.000181889	111.75					1	71.1938	0.293982	71.194		1	S	NQEPLRSPEVGDE	Proline-directed	0.05	0.000181889	111.75	_ENQEPLRpSPEVGDEEALRPLTK_	ENQEPLRS(1)PEVGDEEALRPLTK	ENQEPLRS(111.65)PEVGDEEALRPLT(-111.65)K	8	3	863.085
260	136	471	471	Phosphoserine	1025	1283;1284	3312	6098	TSenrich-100ughela-2	18162	3309	6093	TSenrich-100ughela-3	19553	IPI00010800;IPI00844287	IPI00010800	IPI00010800	Nestin;Nestin, isoform CRA_c;NES protein;NES protein	Nbla00170;NES;hCG_1999207;NES	Nestin;Similar to Nestin	P48681;D3DVC4;Q2YDX4;A5PKT9;Q05BW3	0.88481	11.8663	0.340778	0.392847	4.02563e-06	130.11	0.88481	11.8663	0.000307636	117.96	0.986318	19.4548	2.62094e-09	132.98		1	S	SLAPPLSPDHSSL	ERK/MAPK;GSK3;Proline-directed;WW GroupIV	0.0023175	2.62094e-09	132.98	_QEASTGQSPEDHASLAPPLpSPDHSSLEAK_	QEASTGQSPEDHASLAPPLS(0.885)PDHS(0.058)S(0.058)LEAK	QEAS(-65.07)T(-61.86)GQS(-58.31)PEDHAS(-43.33)LAPPLS(11.87)PDHS(-11.87)S(-11.87)LEAK	20	3	1022.79
261	136	1492	1492		1433	1804;1805;1806	4649	8272	TSenrich-100ughela-1	16059	4644	8266	TSenrich-100ughela-1	15831	IPI00010800;IPI00478531	IPI00010800	IPI00010800	Nestin;Nestin, isoform CRA_c;NES protein;CDNA: FLJ21841 fis, clone HEP01831	Nbla00170;NES;hCG_1999207	Nestin;CDNA: FLJ21841 fis, clone HEP01831	P48681;D3DVC4;Q2YDX4;Q9H6U9	0.703669	4.93865	0.703669	4.93865	7.32241e-20	166.57	3.7345e-05	-47.9724	0.00133444	112.94	0.318627	-4.06058	0.0012937	113.1		4	S	ETESQDSAEPSGS	CK1;GSK3	0.081	7.32241e-20	166.57	_TALEpTESQDpSAEPpSGpSEEESDPVSLER_	T(0.419)ALET(0.476)ES(0.372)QDS(0.704)AEPS(0.543)GS(0.795)EEES(0.54)DPVS(0.153)LER	T(-0.8)ALET(0.8)ES(-3.55)QDS(4.94)AEPS(0.8)GS(5.96)EEES(-0.8)DPVS(-9.63)LER	10	3	1067.04
262	136	1496	1496		1433	1804;1805;1806	4649	8272	TSenrich-100ughela-1	16059	4644	8266	TSenrich-100ughela-1	15831	IPI00010800;IPI00478531	IPI00010800	IPI00010800	Nestin;Nestin, isoform CRA_c;NES protein;CDNA: FLJ21841 fis, clone HEP01831	Nbla00170;NES;hCG_1999207	Nestin;CDNA: FLJ21841 fis, clone HEP01831	P48681;D3DVC4;Q2YDX4;Q9H6U9	0.542513	0.795675	0.542513	0.795675	7.32241e-20	166.57	0.845633	6.49528	0.00133444	112.94	0.719879	1.93508	0.0012937	113.1		4	S	QDSAEPSGSEEES	CK1;CK2	0.117	7.32241e-20	166.57	_TALEpTESQDpSAEPpSGpSEEESDPVSLER_	T(0.419)ALET(0.476)ES(0.372)QDS(0.704)AEPS(0.543)GS(0.795)EEES(0.54)DPVS(0.153)LER	T(-0.8)ALET(0.8)ES(-3.55)QDS(4.94)AEPS(0.8)GS(5.96)EEES(-0.8)DPVS(-9.63)LER	14	3	1067.04
263	136	1498	1498		1433	1804;1805;1806	4649	8272	TSenrich-100ughela-1	16059	4644	8266	TSenrich-100ughela-1	15831	IPI00010800;IPI00478531	IPI00010800	IPI00010800	Nestin;Nestin, isoform CRA_c;NES protein;CDNA: FLJ21841 fis, clone HEP01831	Nbla00170;NES;hCG_1999207	Nestin;CDNA: FLJ21841 fis, clone HEP01831	P48681;D3DVC4;Q2YDX4;Q9H6U9	0.794953	5.9629	0.794953	5.9629	7.32241e-20	166.57	0.312207	-6.36699	0.00133444	112.94	0.628982	1.24404	0.0012937	113.1		4	S	SAEPSGSEEESDP	CK2;GSK3	0.081	7.32241e-20	166.57	_TALEpTESQDpSAEPpSGpSEEESDPVSLER_	T(0.419)ALET(0.476)ES(0.372)QDS(0.704)AEPS(0.543)GS(0.795)EEES(0.54)DPVS(0.153)LER	T(-0.8)ALET(0.8)ES(-3.55)QDS(4.94)AEPS(0.8)GS(5.96)EEES(-0.8)DPVS(-9.63)LER	16	3	1067.04
264	137	315	315	Phosphoserine	1245	1554	3997	7276	TSenrich-100ughela-3	13331	3997	7276	TSenrich-100ughela-3	13331	IPI00010882	IPI00010882	IPI00010882	DNA fragmentation factor 45 kDa subunit;DNA fragmentation factor subunit alpha;Inhibitor of CAD;DNAation factor, 45kDa, alpha polypeptide isoform 1 variant;cDNA, FLJ93833, Homo sapiens DNAation factor, 45kDa, alpha polypeptide(DFFA), mRNA;DNAation factor, 45kDa, alpha polypeptide;DNAation factor, 45kDa, alpha polypeptide, isoform CRA_c	DFF1;DFF45;DFFA;H13;hCG_25280;RP5-1113E3.2-001	Isoform DFF45 of DNA fragmentation factor subunit alpha (Fragment)	O00273-1;O00273;Q53HN4;Q5T6G6	0.999986	49.3025									0.999986	49.3025	0.0155098	109.76		1	S	ISASKASPPGDLQ	CK1;Proline-directed	0.05	0.0155098	109.76	_SISASKApSPPGDLQNPK_	SISASKAS(1)PPGDLQNPK	S(-64.37)IS(-56.97)AS(-49.3)KAS(49.3)PPGDLQNPK	8	2	888.93
265	139	2716	2716		1075;1137	1337;1414	3677	6758	TSenrich-100ughela-2	26705	3672	6739	TSenrich-100ughela-1	23427	IPI00010951	IPI00010951	IPI00010951	450 kDa epidermal antigen;Epiplakin;Putative uncharacterized protein DKFZp434G0719	EPIPL;EPPK1;DKFZp434G0719	Epiplakin	P58107;Q9NSU9	0.81941	6.59606	0.929947	11.6291	1.85342e-10	147.52	0.81941	6.59606	3.13155e-07	142.45	0.45778	0	9.39907e-07	133.45		1	S	GLRRQVSASELHT	CAMK2;CHK1;CHK1/2;CK2;PKD	0.003192	1.85342e-10	147.52	_RQVpSASELHTSGILGPETLR_	RQVS(0.819)AS(0.179)ELHT(0.001)S(0.001)GILGPETLR	RQVS(6.6)AS(-6.6)ELHT(-31.5)S(-31.5)GILGPET(-86.12)LR	4	2	1116.06
266	140	143	143		1413	1781	4586	8152	TSenrich-100ughela-1	10817	4585	8151	TSenrich-100ughela-3	13995	IPI00011032;IPI00879991;IPI00445622;IPI00879719	IPI00011032	IPI00011032	TBC1 domain family member 22A;cDNA, FLJ96895, highly similar to Homo sapiens TBC1 domain family, member 22A (TBC1D22A), mRNA;cDNA FLJ31029 fis, clone HSYRA1000119, highly similar to TBC1 domain family member 22A;TBC1 domain family, member 22A;TBC1 domain family, member 22A, isoform CRA_a;cDNA FLJ45751 fis, clone LYMPB2002344, highly similar to TBC1 domain family member 22A;TBC1 domain family, mem…	C22orf4;TBC1D22A;hCG_1734981;hCG_1734981;LL22NC03-65D1.1-006;TBC1D22A;C22orf4;TBC1D22A	Isoform 1 of TBC1 domain family member 22A;cDNA FLJ45751 fis, clone LYMPB2002344, highly similar to TBC1 domain family member 22A;Isoform 3 of TBC1 domain family member 22A;26 kDa protein	Q8WUA7-1;Q8WUA7;B2RE30;B3KP29;B9A6M3;B0QYI3;Q8WUA7-3	0.202918	0	0.202918	0	0.411484	66.727					0.199998	0	0.000223364	110.06		1	S	DLRLVKSVSESHT	CK2;GSK3;NEK6	0.076	0.000223364	110.06	_pSVSESHTSCPAESASDAAPLQR_	S(0.203)VS(0.203)ES(0.185)HT(0.203)S(0.203)CPAES(0.002)AS(0.001)DAAPLQR	S(0)VS(0)ES(-0.41)HT(0)S(0)CPAES(-19.68)AS(-21.5)DAAPLQR	1	3	789.669
267	140	145	145		1413	1781	4586	8152	TSenrich-100ughela-1	10817	4585	8151	TSenrich-100ughela-3	13995	IPI00011032;IPI00879991;IPI00445622;IPI00879719	IPI00011032	IPI00011032	TBC1 domain family member 22A;cDNA, FLJ96895, highly similar to Homo sapiens TBC1 domain family, member 22A (TBC1D22A), mRNA;cDNA FLJ31029 fis, clone HSYRA1000119, highly similar to TBC1 domain family member 22A;TBC1 domain family, member 22A;TBC1 domain family, member 22A, isoform CRA_a;cDNA FLJ45751 fis, clone LYMPB2002344, highly similar to TBC1 domain family member 22A;TBC1 domain family, mem…	C22orf4;TBC1D22A;hCG_1734981;hCG_1734981;LL22NC03-65D1.1-006;TBC1D22A;C22orf4;TBC1D22A	Isoform 1 of TBC1 domain family member 22A;cDNA FLJ45751 fis, clone LYMPB2002344, highly similar to TBC1 domain family member 22A;Isoform 3 of TBC1 domain family member 22A;26 kDa protein	Q8WUA7-1;Q8WUA7;B2RE30;B3KP29;B9A6M3;B0QYI3;Q8WUA7-3	0.202918	0	0.202918	0	0.411484	66.727					0.199998	0	0.000223364	110.06		1	S	RLVKSVSESHTSC	CHK1;PKD	0.020748	0.000223364	110.06	_pSVSESHTSCPAESASDAAPLQR_	S(0.203)VS(0.203)ES(0.185)HT(0.203)S(0.203)CPAES(0.002)AS(0.001)DAAPLQR	S(0)VS(0)ES(-0.41)HT(0)S(0)CPAES(-19.68)AS(-21.5)DAAPLQR	3	3	789.669
268	140	150	150		1413	1781	4586	8152	TSenrich-100ughela-1	10817	4585	8151	TSenrich-100ughela-3	13995	IPI00011032;IPI00879991;IPI00445622;IPI00879719	IPI00011032	IPI00011032	TBC1 domain family member 22A;cDNA, FLJ96895, highly similar to Homo sapiens TBC1 domain family, member 22A (TBC1D22A), mRNA;cDNA FLJ31029 fis, clone HSYRA1000119, highly similar to TBC1 domain family member 22A;TBC1 domain family, member 22A;TBC1 domain family, member 22A, isoform CRA_a;cDNA FLJ45751 fis, clone LYMPB2002344, highly similar to TBC1 domain family member 22A;TBC1 domain family, mem…	C22orf4;TBC1D22A;hCG_1734981;hCG_1734981;LL22NC03-65D1.1-006;TBC1D22A;C22orf4;TBC1D22A	Isoform 1 of TBC1 domain family member 22A;cDNA FLJ45751 fis, clone LYMPB2002344, highly similar to TBC1 domain family member 22A;Isoform 3 of TBC1 domain family member 22A;26 kDa protein	Q8WUA7-1;Q8WUA7;B2RE30;B3KP29;B9A6M3;B0QYI3;Q8WUA7-3	0.202918	0	0.202918	0	0.411484	66.727					0.199998	0	0.000223364	110.06		1	S	VSESHTSCPAESA	CK1	0.081	0.000223364	110.06	_pSVSESHTSCPAESASDAAPLQR_	S(0.203)VS(0.203)ES(0.185)HT(0.203)S(0.203)CPAES(0.002)AS(0.001)DAAPLQR	S(0)VS(0)ES(-0.41)HT(0)S(0)CPAES(-19.68)AS(-21.5)DAAPLQR	8	3	789.669
269	142	23	23	Phosphoserine	543	701	1756	2963	TSenrich-100ughela-2	16937	1756	2963	TSenrich-100ughela-2	16937	IPI00011069	IPI00011069	IPI00011069	Uracil-DNA glycosylase	DGU;UNG;UNG1;UNG15	Isoform 2 of Uracil-DNA glycosylase	P13051-1;P13051;E5KTA5	0.948699	12.67	0.27971	-4.04486	9.57548e-09	133.71	0.948699	12.67	2.10353e-21	162.49						1	S	RKRHAPSPEPAVQ	Proline-directed	0.05	2.10353e-21	162.49	_HAPpSPEPAVQGTGVAGVPEESGDAAAIPAK_	HAPS(0.949)PEPAVQGT(0.051)GVAGVPEESGDAAAIPAK	HAPS(12.67)PEPAVQGT(-12.67)GVAGVPEES(-110.27)GDAAAIPAK	4	3	964.125
270	142	63	63	Phosphoserine	668	842	2099	3672	TSenrich-100ughela-2	16098	2099	3672	TSenrich-100ughela-2	16098	IPI00011069;IPI00006516	IPI00011069	IPI00011069	Uracil-DNA glycosylase;Uracil-DNA glycosylase;Putative uncharacterized protein DKFZp781L1143	DGU;UNG;UNG1;UNG15;DGU;UNG;UNG1;UNG15;DKFZp781L1143	Isoform 2 of Uracil-DNA glycosylase;Isoform 1 of Uracil-DNA glycosylase	P13051-1;P13051;E5KTA5;P13051-2;E5KTA6;Q68DM5;Q6FHS8	0.458186	0	0.22619	-5.13561	1.9489e-13	160.09	0.458186	0	6.66158e-18	171.64	0.302502	-1.16956	8.08873e-09	139.03		2	S	EPGTPPSSPLSAE	GSK3	0.081	6.66158e-18	171.64	_KAPAGQEEPGpTPPpSSPLSAEQLDR_	KAPAGQEEPGT(1)PPS(0.458)S(0.458)PLS(0.084)AEQLDR	KAPAGQEEPGT(37.19)PPS(0)S(0)PLS(-7.38)AEQLDR	14	3	874.721
271	142	64	64	Phosphoserine	668	842	2099	3672	TSenrich-100ughela-2	16098	2099	3672	TSenrich-100ughela-2	16098	IPI00011069;IPI00006516	IPI00011069	IPI00011069	Uracil-DNA glycosylase;Uracil-DNA glycosylase;Putative uncharacterized protein DKFZp781L1143	DGU;UNG;UNG1;UNG15;DGU;UNG;UNG1;UNG15;DKFZp781L1143	Isoform 2 of Uracil-DNA glycosylase;Isoform 1 of Uracil-DNA glycosylase	P13051-1;P13051;E5KTA5;P13051-2;E5KTA6;Q68DM5;Q6FHS8	0.458186	0	0.737963	5.13561	1.9489e-13	160.09	0.458186	0	6.66158e-18	171.64	0.302502	-1.16956	8.08873e-09	139.03		2	S	PGTPPSSPLSAEQ	CK1;ERK/MAPK;Polo box;Proline-directed;WW GroupIV	0.0023175	6.66158e-18	171.64	_KAPAGQEEPGpTPPpSSPLSAEQLDR_	KAPAGQEEPGT(1)PPS(0.458)S(0.458)PLS(0.084)AEQLDR	KAPAGQEEPGT(37.19)PPS(0)S(0)PLS(-7.38)AEQLDR	15	3	874.721
272	143	80	80		1639	2068	5270	9316	TSenrich-100ughela-2	23867	5270	9316	TSenrich-100ughela-2	23867	IPI00011118;IPI00946732;IPI00945295	IPI00011118	IPI00011118	Putative uncharacterized protein RRM2;Ribonucleoside-diphosphate reductase subunit M2;Ribonucleotide reductase small chain;Ribonucleotide reductase small subunit;cDNA FLJ16813 fis, clone THYMU3030231, highly similar to Ribonucleoside-diphosphate reductase M2 subunit;cDNA FLJ35352 fis, clone PUAEN1000121, highly similar to Ribonucleoside-diphosphate reductase M2 subunit (EC 1.17.4.1);Similar to ri…	RRM2;RR2;RRM2;RR2M	ribonucleoside-diphosphate reductase subunit M2 isoform 1;Ribonucleoside-diphosphate reductase subunit M2;Ribonucleotide reductase M2 subunit (Fragment)	C9JXC1;D6W4Z6;P31350;B3KS26;Q8N6S3;Q9UKM0	1	89.2774					1	89.2774	2.26964e-33	197.41	1	108.426	0.000111717	131.4		1	S	PQQLQLSPLKGLS	CDK1;CDK2;NEK6;Proline-directed	0.0057	2.26964e-33	197.41	_VPLAPITDPQQLQLpSPLK_	VPLAPITDPQQLQLS(1)PLK	VPLAPIT(-89.28)DPQQLQLS(89.28)PLK	15	2	1019.55
273	146	240	240		189	246	615	1098	TSenrich-100ughela-1	15825	615	1098	TSenrich-100ughela-1	15825	IPI00974484;IPI00011253;IPI00879848;IPI00939811	IPI00974484	IPI00974484	40S ribosomal protein S3;Ribosomal protein S3 variant;Ribosomal protein S3	OK/SW-cl.26;RPS3;RPS3	28 kDa protein;40S ribosomal protein S3;12 kDa protein;Ribosomal protein S3	P23396;Q53G83;Q9NQS8	0.465894	0	0.465894	0	0.0724032	78.611										1	S	LPTTPISEQKGGK	CK1	0.143	0.0724032	78.611	_DEILPTpTPISEQK_	DEILPT(0.068)T(0.466)PIS(0.466)EQK	DEILPT(-8.34)T(0)PIS(0)EQK	10	2	775.871
274	147	289	289		186;1541	241;242;1942;1943;1944	4977	8830	TSenrich-100ughela-2	22464	4976	8827	TSenrich-100ughela-1	20388	IPI00011268;IPI00216044;IPI00514496	IPI00011268	IPI00011268	Autoantigen p542;Heterogeneous nuclear ribonucleoprotein C-like 2;hnRNP associated with lethal yellow protein homolog;RNA-binding protein Raly;cDNA FLJ77422, highly similar to Homo sapiens RNA binding protein, autoantigenic (hnRNP-associated with lethal yellow homolog (mouse)), transcript variant 1, mRNA;RNA binding protein (Autoantigenic, hnRNP-associated with lethal yellow) long isoform variant…	HNRPCL2;P542;RALY;hCG_37136;HNRPCL2;P542;RALY;RALY;RP1-64K7.1-005	cDNA FLJ77422, highly similar to Homo sapiens RNA binding protein, autoantigenic (hnRNP-associated with lethal yellow homolog (mouse)), transcript variant 1, mRNA (Fragment);Isoform 1 of RNA-binding protein Raly;RNA binding protein, autoantigenic	Q9UKM9-1;Q9UKM9;Q53GL6;Q9UKM9-2;A8K4T9;Q5QPM0	0.996675	25.1082	0.995765	23.8136	6.66454e-15	160.55	0.996675	25.1082	1.42527e-08	143.11	0.429956	0	1.8175e-05	131.82		1	S	EGLLTHSEEELEH	CK2;NEK6	0.076	6.66454e-15	160.55	_TRDDGDEEGLLTHpSEEELEHSQDTDADDGALQ_	TRDDGDEEGLLT(0.003)HS(0.997)EEELEHSQDTDADDGALQ	T(-61.78)RDDGDEEGLLT(-25.11)HS(25.11)EEELEHS(-36.09)QDT(-52.86)DADDGALQ	14	3	1203.15
275	147;910	135;119	135	Phosphoserine	498	645	1615	2753	TSenrich-100ughela-2	14713	1615	2753	TSenrich-100ughela-2	14713	IPI00011268;IPI00216044;IPI00514496;IPI00641351;IPI00642213	IPI00011268;IPI00642213	IPI00011268	Autoantigen p542;Heterogeneous nuclear ribonucleoprotein C-like 2;hnRNP associated with lethal yellow protein homolog;RNA-binding protein Raly;cDNA FLJ77422, highly similar to Homo sapiens RNA binding protein, autoantigenic (hnRNP-associated with lethal yellow homolog (mouse)), transcript variant 1, mRNA;RNA binding protein (Autoantigenic, hnRNP-associated with lethal yellow) long isoform variant…	HNRPCL2;P542;RALY;hCG_37136;HNRPCL2;P542;RALY;RALY;RP1-64K7.1-005;RALY;RP1-64K7.1-004;RALY;RP1-64K7.1-007	cDNA FLJ77422, highly similar to Homo sapiens RNA binding protein, autoantigenic (hnRNP-associated with lethal yellow homolog (mouse)), transcript variant 1, mRNA (Fragment);Isoform 1 of RNA-binding protein Raly;RNA binding protein, autoantigenic;RNA bindi	Q9UKM9-1;Q9UKM9;Q53GL6;Q9UKM9-2;A8K4T9;Q5QPM0;B4DSJ1;Q5QPM1;Q5QPL9	1	87.7851	1	87.3209	0.0366954	87.321	1	87.7851	0.0354444	87.785	1	55.5041	0.317086	55.504		1	S	DYRGRLSPVPVPR	PKA;Proline-directed	0.042	0.0354444	87.785	_GRLpSPVPVPR_	GRLS(1)PVPVPR	GRLS(87.79)PVPVPR	4	2	579.313
276	148	60	60	Phosphoserine	392	512	1273	2210	TSenrich-100ughela-2	25629	1272	2209	TSenrich-100ughela-2	25574	IPI00396015;IPI00942045;IPI00011569;IPI00793409;IPI00472339;IPI00796157;IPI00887706	IPI00396015	IPI00396015	ACC-alpha;Acetyl-CoA carboxylase 1;Biotin carboxylase;ACC-alpha;Acetyl-CoA carboxylase 1;Biotin carboxylase;Acetyl-Coenzyme A carboxylase alpha;HCG30204, isoform CRA_b;Putative uncharacterized protein ACACA	ACAC;ACACA;ACC1;ACCA;ACAC;ACACA;ACC1;ACCA;hCG_30204;ACACA	Isoform 4 of Acetyl-CoA carboxylase 1;268 kDa protein;Isoform 1 of Acetyl-CoA carboxylase 1;265 kDa protein;13 kDa protein;Uncharacterized protein;5 kDa protein	Q13085-4;Q13085;Q13085-1;B2ZZ90;D3YTJ0	0.812893	5.85479	0.0305639	-18.0234	8.65707e-12	160.36	0.812893	5.85479	2.33488e-56	217.55	0.356836	-2.55873	1.56323e-16	170.57		2	S	SRFIIGSVSEDNS	CK2	0.117	2.33488e-56	217.55	_FIIGpSVSEDNpSEDEISNLVK_	FIIGS(0.813)VS(0.28)EDNS(0.907)EDEISNLVK	FIIGS(5.85)VS(-5.85)EDNS(8.91)EDEIS(-66.12)NLVK	5	3	785.673
277	148	66	66		392	512	1273	2210	TSenrich-100ughela-2	25629	1272	2209	TSenrich-100ughela-2	25574	IPI00396015;IPI00942045;IPI00011569;IPI00793409;IPI00472339;IPI00796157;IPI00887706	IPI00396015	IPI00396015	ACC-alpha;Acetyl-CoA carboxylase 1;Biotin carboxylase;ACC-alpha;Acetyl-CoA carboxylase 1;Biotin carboxylase;Acetyl-Coenzyme A carboxylase alpha;HCG30204, isoform CRA_b;Putative uncharacterized protein ACACA	ACAC;ACACA;ACC1;ACCA;ACAC;ACACA;ACC1;ACCA;hCG_30204;ACACA	Isoform 4 of Acetyl-CoA carboxylase 1;268 kDa protein;Isoform 1 of Acetyl-CoA carboxylase 1;265 kDa protein;13 kDa protein;Uncharacterized protein;5 kDa protein	Q13085-4;Q13085;Q13085-1;B2ZZ90;D3YTJ0	0.907496	8.91407	0.984718	18.0234	8.65707e-12	160.36	0.907496	8.91407	2.33488e-56	217.55	0.999983	45.8407	1.56323e-16	170.57		2	S	SVSEDNSEDEISN	CK1;CK2	0.117	2.33488e-56	217.55	_FIIGpSVSEDNpSEDEISNLVK_	FIIGS(0.813)VS(0.28)EDNS(0.907)EDEISNLVK	FIIGS(5.85)VS(-5.85)EDNS(8.91)EDEIS(-66.12)NLVK	11	3	785.673
278	148	117	117		1371	1723	4422	7902	TSenrich-100ughela-2	17543	4421	7901	TSenrich-100ughela-1	16220	IPI00396015;IPI00942045;IPI00011569;IPI00793409;IPI00472339;IPI00796157;IPI00847501	IPI00396015	IPI00396015	ACC-alpha;Acetyl-CoA carboxylase 1;Biotin carboxylase;ACC-alpha;Acetyl-CoA carboxylase 1;Biotin carboxylase;Acetyl-Coenzyme A carboxylase alpha;HCG30204, isoform CRA_b;Putative uncharacterized protein ACACA;ACC-alpha;Acetyl-CoA carboxylase 1;Biotin carboxylase	ACAC;ACACA;ACC1;ACCA;ACAC;ACACA;ACC1;ACCA;hCG_30204;ACACA;ACAC;ACACA;ACC1;ACCA	Isoform 4 of Acetyl-CoA carboxylase 1;268 kDa protein;Isoform 1 of Acetyl-CoA carboxylase 1;265 kDa protein;13 kDa protein;Uncharacterized protein;Isoform 2 of Acetyl-CoA carboxylase 1	Q13085-4;Q13085;Q13085-1;B2ZZ90;D3YTJ0;Q13085-2	0.95144	15.9313	0.999869	41.8216	0.00068477	110.87	0.95144	15.9313	0.00538382	102.57	0.265739	-1.40364	0.0201246	66.535		1	S	HIRSSMSGLHLVK	CK1	0.081	0.00068477	110.87	_SSMpSGLHLVK_	S(0.024)S(0.024)MS(0.951)GLHLVK	S(-15.93)S(-15.93)MS(15.93)GLHLVK	4	2	569.77
279	149	194	194	Phosphoserine	194	251	628	1116	TSenrich-100ughela-3	18597	628	1116	TSenrich-100ughela-3	18597	IPI00011592;IPI00909090;IPI00909455	IPI00011592	IPI00011592	Cytoplasmic dynein 1 light intermediate chain 2;Dynein light intermediate chain 2, cytosolic;LIC53/55;cDNA FLJ56694, highly similar to Cytoplasmic dynein 1 light intermediate chain 2;cDNA FLJ52924, highly similar to Cytoplasmic dynein 1 light intermediate chain 2;cDNA FLJ54239, highly similar to Cytoplasmic dynein 1 light intermediate chain 2	DNCLI2;DYNC1LI2;LIC2	Cytoplasmic dynein 1 light intermediate chain 2;cDNA FLJ52924, highly similar to Cytoplasmic dynein 1 light intermediate chain 2;cDNA FLJ54239, highly similar to Cytoplasmic dynein 1 light intermediate chain 2	O43237;B4DHD8;B4DZP4;B4E2E0	1	97.325									1	97.325	9.9346e-17	128.43		1	S	EEGCQGSPQRRGP	CDK1;CDK2;Proline-directed	0.0057	9.9346e-17	128.43	_DFQDYMEPEEGCQGpSPQR_	DFQDYMEPEEGCQGS(1)PQR	DFQDY(-97.32)MEPEEGCQGS(97.32)PQR	15	2	1126.92
280	150	407	407	Phosphoserine	1610	2031;2032	5188	9197	TSenrich-100ughela-2	17679	5187	9196	TSenrich-100ughela-2	17756	IPI00218326;IPI00011675;IPI00218325;IPI00218324;IPI00218327;IPI00917048;IPI00917345;IPI00917227;IPI00917514;IPI00917667	IPI00218326	IPI00218326	Lysp100b;Nuclear autoantigen Sp-100;Nuclear dot-associated Sp100 protein;Speckled 100 kDa;Lysp100b;Nuclear autoantigen Sp-100;Nuclear dot-associated Sp100 protein;Speckled 100 kDa;Putative uncharacterized protein SP100;Lysp100b;Nuclear autoantigen Sp-100;Nuclear dot-associated Sp100 protein;Speckled 100 kDa;Lysp100b;Nuclear autoantigen Sp-100;Nuclear dot-associated Sp100 protein;Speckled 100 kDa;…	SP100;SP100;SP100;SP100;SP100;SP100	Isoform Sp100-C of Nuclear autoantigen Sp-100;Isoform Sp100-HMG of Nuclear autoantigen Sp-100;Isoform Sp100-B of Nuclear autoantigen Sp-100;Isoform Sp100-A of Nuclear autoantigen Sp-100;Isoform SpAlt-C of Nuclear autoantigen Sp-100;cDNA FLJ59578, highly si	P23497-4;P23497;P23497-1;Q53TD0;P23497-3;P23497-2;P23497-5;B4E2B9;Q4ZG64;B4DDX5;B8ZZD8;Q9P0W1	1	71.4104	0.999999	67.9997	6.72804e-10	133.46	1	71.4104	3.11366e-10	140.71	1	72.4913	4.29754e-06	124.19		3	S	GQDHDFSESSEEE			3.11366e-10	140.71	_VIGQDHDFpSEpSpSEEEAPAEASSGALR_	VIGQDHDFS(1)ES(1)S(1)EEEAPAEASSGALR	VIGQDHDFS(71.41)ES(58.14)S(51.14)EEEAPAEAS(-51.14)S(-54.77)GALR	9	2	1479.56
281	150	409	409	Phosphoserine	1610	2031;2032	5188	9197	TSenrich-100ughela-2	17679	5187	9196	TSenrich-100ughela-2	17756	IPI00218326;IPI00011675;IPI00218325;IPI00218324;IPI00218327;IPI00917048;IPI00917345;IPI00917227;IPI00917514;IPI00917667	IPI00218326	IPI00218326	Lysp100b;Nuclear autoantigen Sp-100;Nuclear dot-associated Sp100 protein;Speckled 100 kDa;Lysp100b;Nuclear autoantigen Sp-100;Nuclear dot-associated Sp100 protein;Speckled 100 kDa;Putative uncharacterized protein SP100;Lysp100b;Nuclear autoantigen Sp-100;Nuclear dot-associated Sp100 protein;Speckled 100 kDa;Lysp100b;Nuclear autoantigen Sp-100;Nuclear dot-associated Sp100 protein;Speckled 100 kDa;…	SP100;SP100;SP100;SP100;SP100;SP100	Isoform Sp100-C of Nuclear autoantigen Sp-100;Isoform Sp100-HMG of Nuclear autoantigen Sp-100;Isoform Sp100-B of Nuclear autoantigen Sp-100;Isoform Sp100-A of Nuclear autoantigen Sp-100;Isoform SpAlt-C of Nuclear autoantigen Sp-100;cDNA FLJ59578, highly si	P23497-4;P23497;P23497-1;Q53TD0;P23497-3;P23497-2;P23497-5;B4E2B9;Q4ZG64;B4DDX5;B8ZZD8;Q9P0W1	0.999997	58.1418	0.999998	58.8218	6.72804e-10	133.46	0.999997	58.1418	3.11366e-10	140.71	0.999998	60.2006	4.29754e-06	124.19		3	S	DHDFSESSEEEAP	CK2	0.117	3.11366e-10	140.71	_VIGQDHDFpSEpSpSEEEAPAEASSGALR_	VIGQDHDFS(1)ES(1)S(1)EEEAPAEASSGALR	VIGQDHDFS(71.41)ES(58.14)S(51.14)EEEAPAEAS(-51.14)S(-54.77)GALR	11	2	1479.56
282	150	410	410	Phosphoserine	1610	2031;2032	5188	9197	TSenrich-100ughela-2	17679	5187	9196	TSenrich-100ughela-2	17756	IPI00218326;IPI00011675;IPI00218325;IPI00218324;IPI00218327;IPI00917048;IPI00917345;IPI00917227;IPI00917514;IPI00917667	IPI00218326	IPI00218326	Lysp100b;Nuclear autoantigen Sp-100;Nuclear dot-associated Sp100 protein;Speckled 100 kDa;Lysp100b;Nuclear autoantigen Sp-100;Nuclear dot-associated Sp100 protein;Speckled 100 kDa;Putative uncharacterized protein SP100;Lysp100b;Nuclear autoantigen Sp-100;Nuclear dot-associated Sp100 protein;Speckled 100 kDa;Lysp100b;Nuclear autoantigen Sp-100;Nuclear dot-associated Sp100 protein;Speckled 100 kDa;…	SP100;SP100;SP100;SP100;SP100;SP100	Isoform Sp100-C of Nuclear autoantigen Sp-100;Isoform Sp100-HMG of Nuclear autoantigen Sp-100;Isoform Sp100-B of Nuclear autoantigen Sp-100;Isoform Sp100-A of Nuclear autoantigen Sp-100;Isoform SpAlt-C of Nuclear autoantigen Sp-100;cDNA FLJ59578, highly si	P23497-4;P23497;P23497-1;Q53TD0;P23497-3;P23497-2;P23497-5;B4E2B9;Q4ZG64;B4DDX5;B8ZZD8;Q9P0W1	0.999989	51.1391	0.999997	58.944	6.72804e-10	133.46	0.999989	51.1391	3.11366e-10	140.71	0.999993	53.1934	4.29754e-06	124.19		3	S	HDFSESSEEEAPA	CK1;CK2	0.081	3.11366e-10	140.71	_VIGQDHDFpSEpSpSEEEAPAEASSGALR_	VIGQDHDFS(1)ES(1)S(1)EEEAPAEASSGALR	VIGQDHDFS(71.41)ES(58.14)S(51.14)EEEAPAEAS(-51.14)S(-54.77)GALR	12	2	1479.56
283	151	484	484	Phosphoserine	74	100	240	388	TSenrich-100ughela-2	20210	238	383	TSenrich-100ughela-1	18611	IPI00011676	IPI00011676	IPI00011676	Neural Wiskott-Aldrich syndrome protein;WASL protein;Wiskott-Aldrich syndrome-like;cDNA FLJ76749, highly similar to Homo sapiens Wiskott-Aldrich syndrome-like (WASL), mRNA;Putative uncharacterized protein DKFZp779G0847	WASL;tcag7.28;DKFZp779G0847	Neural Wiskott-Aldrich syndrome protein	O00401;A1JUI9;A4D0Y1;A8K180;Q68DE4	1	177.376	1	196.097	1.10724e-33	196.1	1	177.376	1.14645e-24	177.38	1	186.98	2.05115e-25	186.98		2	S	RSKAIHSSDEDED	CK2	0.117	1.10724e-33	196.1	_AIHpSpSDEDEDEDDEEDFEDDDEWED_	AIHS(1)S(1)DEDEDEDDEEDFEDDDEWED	AIHS(177.38)S(177.38)DEDEDEDDEEDFEDDDEWED	4	2	1595.48
284	151	485	485	Phosphoserine	74	100	240	388	TSenrich-100ughela-2	20210	238	383	TSenrich-100ughela-1	18611	IPI00011676	IPI00011676	IPI00011676	Neural Wiskott-Aldrich syndrome protein;WASL protein;Wiskott-Aldrich syndrome-like;cDNA FLJ76749, highly similar to Homo sapiens Wiskott-Aldrich syndrome-like (WASL), mRNA;Putative uncharacterized protein DKFZp779G0847	WASL;tcag7.28;DKFZp779G0847	Neural Wiskott-Aldrich syndrome protein	O00401;A1JUI9;A4D0Y1;A8K180;Q68DE4	1	177.376	1	196.097	1.10724e-33	196.1	1	177.376	1.14645e-24	177.38	1	186.98	2.05115e-25	186.98		2	S	SKAIHSSDEDEDE	CK2	0.117	1.10724e-33	196.1	_AIHpSpSDEDEDEDDEEDFEDDDEWED_	AIHS(1)S(1)DEDEDEDDEEDFEDDDEWED	AIHS(177.38)S(177.38)DEDEDEDDEEDFEDDDEWED	5	2	1595.48
285	152	27	27	Phosphoserine	59	81	196	330	TSenrich-100ughela-2	20711	196	330	TSenrich-100ughela-2	20711	IPI00011689	IPI00011689	IPI00011689	Calcium/calmodulin-dependent eukaryotic elongation factor 2 kinase;Eukaroytic elongation factor 2 kinase	EEF2K	Eukaryotic elongation factor 2 kinase	O00418	0.991282	20.5134					0.991282	20.5134	0.0749926	109.13	0.969846	14.1704	0.0971931	106.12		2	S	AGHDGDSDGDSDD	CK2;GSK3	0.081	0.0749926	109.13	_AGHDGDpSDGDpSDDEEGYFICPITDDPSSNQNVNSK_	AGHDGDS(0.991)DGDS(0.965)DDEEGY(0.044)FICPITDDPSSNQNVNSK	AGHDGDS(20.51)DGDS(14.35)DDEEGY(-14.35)FICPIT(-44.16)DDPS(-45.12)S(-45.12)NQNVNS(-47.41)K	7	3	1306.48
286	152	31	31	Phosphoserine	59	81	196	330	TSenrich-100ughela-2	20711	196	330	TSenrich-100ughela-2	20711	IPI00011689	IPI00011689	IPI00011689	Calcium/calmodulin-dependent eukaryotic elongation factor 2 kinase;Eukaroytic elongation factor 2 kinase	EEF2K	Eukaryotic elongation factor 2 kinase	O00418	0.964596	14.3451					0.964596	14.3451	0.0749926	109.13	0.806696	6.05249	0.0971931	106.12		2	S	GDSDGDSDDEEGY	CK1;CK2	0.117	0.0749926	109.13	_AGHDGDpSDGDpSDDEEGYFICPITDDPSSNQNVNSK_	AGHDGDS(0.991)DGDS(0.965)DDEEGY(0.044)FICPITDDPSSNQNVNSK	AGHDGDS(20.51)DGDS(14.35)DDEEGY(-14.35)FICPIT(-44.16)DDPS(-45.12)S(-45.12)NQNVNS(-47.41)K	11	3	1306.48
287	153	337	337	Phosphoserine	838	1060	2811	5279	TSenrich-100ughela-1	13073	2810	5278	TSenrich-100ughela-3	15324	IPI00011996;IPI00783182;IPI00829749	IPI00011996	IPI00011996	Uba6-specific E2 conjugating enzyme 1;Ubiquitin carrier protein Z;Ubiquitin-conjugating enzyme E2 Z;Ubiquitin-protein ligase Z;cDNA FLJ56297, highly similar to Rattus norvegicus ubiquitin-conjugating enzyme E2Z (putative) (Ube2z), mRNA;Uba6-specific E2 conjugating enzyme 1;Ubiquitin carrier protein Z;Ubiquitin-conjugating enzyme E2 Z;Ubiquitin-protein ligase Z;Ubiquitin-conjugating enzyme E2Z (Pu…	HOYS7;UBE2Z;HOYS7;UBE2Z;hCG_27511	Isoform 1 of Ubiquitin-conjugating enzyme E2 Z;38 kDa protein;Ubiquitin-conjugating enzyme E2Z (Putative), isoform CRA_a	Q9H832-1;Q9H832;B4DL66;Q9H832-2;D3DTW2	0.970211	15.122	0.970211	15.122	0.165034	85.843					0.920256	4.94294	2.00233e-06	128.86		4	S	ENAEMDSDSSSSG	GSK3	0.081	2.00233e-06	128.86	_LHNENAEMDpSDpSpSSpSGTETDLHGSLR_	LHNENAEMDS(0.97)DS(0.912)S(0.771)S(0.408)S(0.771)GT(0.148)ET(0.02)DLHGS(0.001)LR	LHNENAEMDS(15.12)DS(10.35)S(5.62)S(-5.62)S(5.62)GT(-11.6)ET(-23.09)DLHGS(-37.52)LR	10	3	1037.02
288	153	339	339		838	1060	2811	5279	TSenrich-100ughela-1	13073	2810	5278	TSenrich-100ughela-3	15324	IPI00011996;IPI00783182;IPI00829749	IPI00011996	IPI00011996	Uba6-specific E2 conjugating enzyme 1;Ubiquitin carrier protein Z;Ubiquitin-conjugating enzyme E2 Z;Ubiquitin-protein ligase Z;cDNA FLJ56297, highly similar to Rattus norvegicus ubiquitin-conjugating enzyme E2Z (putative) (Ube2z), mRNA;Uba6-specific E2 conjugating enzyme 1;Ubiquitin carrier protein Z;Ubiquitin-conjugating enzyme E2 Z;Ubiquitin-protein ligase Z;Ubiquitin-conjugating enzyme E2Z (Pu…	HOYS7;UBE2Z;HOYS7;UBE2Z;hCG_27511	Isoform 1 of Ubiquitin-conjugating enzyme E2 Z;38 kDa protein;Ubiquitin-conjugating enzyme E2Z (Putative), isoform CRA_a	Q9H832-1;Q9H832;B4DL66;Q9H832-2;D3DTW2	0.911556	10.3533	0.911556	10.3533	0.165034	85.843					0.756976	0	2.00233e-06	128.86		4	S	AEMDSDSSSSGTE			2.00233e-06	128.86	_LHNENAEMDpSDpSpSSpSGTETDLHGSLR_	LHNENAEMDS(0.97)DS(0.912)S(0.771)S(0.408)S(0.771)GT(0.148)ET(0.02)DLHGS(0.001)LR	LHNENAEMDS(15.12)DS(10.35)S(5.62)S(-5.62)S(5.62)GT(-11.6)ET(-23.09)DLHGS(-37.52)LR	12	3	1037.02
289	153	340	340		838	1060	2811	5279	TSenrich-100ughela-1	13073	2810	5278	TSenrich-100ughela-3	15324	IPI00011996;IPI00783182;IPI00829749	IPI00011996	IPI00011996	Uba6-specific E2 conjugating enzyme 1;Ubiquitin carrier protein Z;Ubiquitin-conjugating enzyme E2 Z;Ubiquitin-protein ligase Z;cDNA FLJ56297, highly similar to Rattus norvegicus ubiquitin-conjugating enzyme E2Z (putative) (Ube2z), mRNA;Uba6-specific E2 conjugating enzyme 1;Ubiquitin carrier protein Z;Ubiquitin-conjugating enzyme E2 Z;Ubiquitin-protein ligase Z;Ubiquitin-conjugating enzyme E2Z (Pu…	HOYS7;UBE2Z;HOYS7;UBE2Z;hCG_27511	Isoform 1 of Ubiquitin-conjugating enzyme E2 Z;38 kDa protein;Ubiquitin-conjugating enzyme E2Z (Putative), isoform CRA_a	Q9H832-1;Q9H832;B4DL66;Q9H832-2;D3DTW2	0.771244	5.62455	0.771244	5.62455	0.165034	85.843					0.756976	0	2.00233e-06	128.86		4	S	EMDSDSSSSGTET	CK1	0.081	2.00233e-06	128.86	_LHNENAEMDpSDpSpSSpSGTETDLHGSLR_	LHNENAEMDS(0.97)DS(0.912)S(0.771)S(0.408)S(0.771)GT(0.148)ET(0.02)DLHGS(0.001)LR	LHNENAEMDS(15.12)DS(10.35)S(5.62)S(-5.62)S(5.62)GT(-11.6)ET(-23.09)DLHGS(-37.52)LR	13	3	1037.02
290	153	342	342		838	1060	2811	5279	TSenrich-100ughela-1	13073	2810	5278	TSenrich-100ughela-3	15324	IPI00011996;IPI00783182;IPI00829749	IPI00011996	IPI00011996	Uba6-specific E2 conjugating enzyme 1;Ubiquitin carrier protein Z;Ubiquitin-conjugating enzyme E2 Z;Ubiquitin-protein ligase Z;cDNA FLJ56297, highly similar to Rattus norvegicus ubiquitin-conjugating enzyme E2Z (putative) (Ube2z), mRNA;Uba6-specific E2 conjugating enzyme 1;Ubiquitin carrier protein Z;Ubiquitin-conjugating enzyme E2 Z;Ubiquitin-protein ligase Z;Ubiquitin-conjugating enzyme E2Z (Pu…	HOYS7;UBE2Z;HOYS7;UBE2Z;hCG_27511	Isoform 1 of Ubiquitin-conjugating enzyme E2 Z;38 kDa protein;Ubiquitin-conjugating enzyme E2Z (Putative), isoform CRA_a	Q9H832-1;Q9H832;B4DL66;Q9H832-2;D3DTW2	0.770981	5.62455	0.770981	5.62455	0.165034	85.843					0.756956	0	2.00233e-06	128.86		4	S	DSDSSSSGTETDL	CK1;CK2	0.081	2.00233e-06	128.86	_LHNENAEMDpSDpSpSSpSGTETDLHGSLR_	LHNENAEMDS(0.97)DS(0.912)S(0.771)S(0.408)S(0.771)GT(0.148)ET(0.02)DLHGS(0.001)LR	LHNENAEMDS(15.12)DS(10.35)S(5.62)S(-5.62)S(5.62)GT(-11.6)ET(-23.09)DLHGS(-37.52)LR	15	3	1037.02
291	154	3	3	Phosphoserine; by NRK	127	172	424	668	TSenrich-100ughela-2	17159	419	663	TSenrich-100ughela-3	17411	IPI00012011;IPI00909841	IPI00012011	IPI00012011	18 kDa phosphoprotein;Cofilin, non-muscle isoform;Cofilin-1;cDNA FLJ51435, moderately similar to Cofilin-1	CFL;CFL1	Cofilin-1;cDNA FLJ51435, moderately similar to Cofilin-1	P23528;B4E112	0.999979	46.7792	0.418322	-1.43171	4.98065e-13	151.64	0.999979	46.7792	3.89685e-13	153.67	0.995611	23.5574	2.5436e-13	156.21		1	S	____MASGVAVSD			2.5436e-13	156.21	_(ac)ApSGVAVSDGVIK_	AS(1)GVAVSDGVIK	AS(46.78)GVAVS(-46.78)DGVIK	2	1	1224.59
292	158	167	167	Phosphoserine	770;1193;1325	979;1483;1655;1656	4239	7641	TSenrich-100ughela-3	23425	2582	4770	TSenrich-100ughela-2	21621	IPI00012149;IPI00927397;IPI00886946;IPI00888444	IPI00012149	IPI00012149	M phase phosphoprotein 10;U3 small nucleolar ribonucleoprotein protein MPP10;cDNA FLJ32300 fis, clone PROST2002227, highly similar to U3 small nucleolar ribonucleoprotein protein MPP10;Putative uncharacterized protein MPHOSPH10	MPHOSPH10;MPP10;MPHOSPH10	U3 small nucleolar ribonucleoprotein protein MPP10;Uncharacterized protein;similar to M-phase phosphoprotein 10;similar to M-phase phosphoprotein 10	O00566;B3KPV5;C9JX83	0.791471	4.95742	1	254.544	4.87276e-179	303.87	1	247.748	7.49741e-235	336.78	0.791471	4.95742	2.59033e-180	314.78		2	S	RKSPVFSDEDSDL	CK1;CK2;GSK3	0.081	7.49741e-235	336.78	_SPVFpSDEDpSDLDFDISK_	S(0.386)PVFS(0.791)DEDS(0.794)DLDFDIS(0.029)K	S(-4.81)PVFS(4.96)DEDS(4.81)DLDFDIS(-15.41)K	5	2	1038.39
293	158	171	171	Phosphoserine	770;1193;1325	979;1483;1655;1656	4239	7641	TSenrich-100ughela-3	23425	2582	4770	TSenrich-100ughela-2	21621	IPI00012149;IPI00927397;IPI00886946;IPI00888444	IPI00012149	IPI00012149	M phase phosphoprotein 10;U3 small nucleolar ribonucleoprotein protein MPP10;cDNA FLJ32300 fis, clone PROST2002227, highly similar to U3 small nucleolar ribonucleoprotein protein MPP10;Putative uncharacterized protein MPHOSPH10	MPHOSPH10;MPP10;MPHOSPH10	U3 small nucleolar ribonucleoprotein protein MPP10;Uncharacterized protein;similar to M-phase phosphoprotein 10;similar to M-phase phosphoprotein 10	O00566;B3KPV5;C9JX83	0.793708	4.80535	1	188.036	4.87276e-179	303.87	1	192.087	7.49741e-235	336.78	0.793708	4.80535	2.59033e-180	314.78		2	S	VFSDEDSDLDFDI	CK1;CK2	0.117	7.49741e-235	336.78	_SPVFpSDEDpSDLDFDISK_	S(0.386)PVFS(0.791)DEDS(0.794)DLDFDIS(0.029)K	S(-4.81)PVFS(4.96)DEDS(4.81)DLDFDIS(-15.41)K	9	2	1038.39
294	159	47	47	Phosphoserine	97	130	316	515	TSenrich-100ughela-2	18288	315	514	TSenrich-100ughela-1	16723	IPI00012199;IPI00412260	IPI00012199	IPI00012199	Coiled-coil domain-containing protein 86;Cytokine-induced protein with coiled-coil domain;cDNA FLJ51395	CCDC86;CYCLON	Coiled-coil domain-containing protein 86;18 kDa protein	Q9H6F5;B4DY99	0.983817	17.8391	0.999473	33.4121	4.68063e-17	161.13	0.983817	17.8391	3.08892e-12	152.62	0.983114	17.6514	2.7135e-09	145.4		1	S	ETREPGSPPSVQR	ERK/MAPK;Proline-directed	0.0025	4.68063e-17	161.13	_ALVEFESNPEETREPGpSPPSVQR_	ALVEFESNPEETREPGS(0.984)PPS(0.016)VQR	ALVEFES(-92.49)NPEET(-56.11)REPGS(17.84)PPS(-17.84)VQR	17	3	879.073
295	159	18	18	Phosphoserine	830	1051;1052	2794	5246	TSenrich-100ughela-2	18377	2790	5241	TSenrich-100ughela-3	19061	IPI00012199;IPI00412260;IPI00446362	IPI00012199	IPI00012199	Coiled-coil domain-containing protein 86;Cytokine-induced protein with coiled-coil domain;cDNA FLJ51395;cDNA FLJ41781 fis, clone IMR322018117	CCDC86;CYCLON	Coiled-coil domain-containing protein 86;18 kDa protein;cDNA FLJ41781 fis, clone IMR322018117	Q9H6F5;B4DY99;Q6ZW18	0.914022	11.4505	0.99972	35.5283	0.0292162	97.169	0.914022	11.4505	0.0588448	82.107	0.989999	21.1471	0.0170088	108.77		2	S	GGLRPESPESLTS	CAMK2;ERK/MAPK;Proline-directed;WW GroupIV	0.000145	0.0170088	108.77	_LGGLRPEpSPEpSLTSVSR_	LGGLRPES(0.914)PES(0.795)LT(0.216)S(0.074)VSR	LGGLRPES(11.45)PES(7.01)LT(-7.01)S(-12.58)VS(-35.8)R	8	2	972.945
296	159	21	21	Phosphoserine	830	1051;1052	2794	5246	TSenrich-100ughela-2	18377	2790	5241	TSenrich-100ughela-3	19061	IPI00012199;IPI00412260;IPI00446362	IPI00012199	IPI00012199	Coiled-coil domain-containing protein 86;Cytokine-induced protein with coiled-coil domain;cDNA FLJ51395;cDNA FLJ41781 fis, clone IMR322018117	CCDC86;CYCLON	Coiled-coil domain-containing protein 86;18 kDa protein;cDNA FLJ41781 fis, clone IMR322018117	Q9H6F5;B4DY99;Q6ZW18	0.795474	7.00816	0.000279932	-35.5283	0.0292162	97.169	0.795474	7.00816	0.0588448	82.107	0.007602	-21.1471	0.0170088	108.77		2	S	RPESPESLTSVSR	CK1	0.081	0.0170088	108.77	_LGGLRPEpSPEpSLTSVSR_	LGGLRPES(0.914)PES(0.795)LT(0.216)S(0.074)VSR	LGGLRPES(11.45)PES(7.01)LT(-7.01)S(-12.58)VS(-35.8)R	11	2	972.945
297	159	91	91	Phosphoserine	882	1110;1111	2941	5507	TSenrich-100ughela-1	10846	2938	5504	TSenrich-100ughela-3	13169	IPI00012199;IPI00412260;IPI00446362	IPI00012199	IPI00012199	Coiled-coil domain-containing protein 86;Cytokine-induced protein with coiled-coil domain;cDNA FLJ51395;cDNA FLJ41781 fis, clone IMR322018117	CCDC86;CYCLON	Coiled-coil domain-containing protein 86;18 kDa protein;cDNA FLJ41781 fis, clone IMR322018117	Q9H6F5;B4DY99;Q6ZW18	0.999618	34.1821	0.999618	34.1821	0.405659	68.782					0.999992	51.1602	1.64799e-43	205.94		1	S	PEPGAASPQRQQD	CDK1;CDK2;Proline-directed	0.0057	1.64799e-43	205.94	_LQQGAGLESPQGQPEPGAApSPQR_	LQQGAGLESPQGQPEPGAAS(1)PQR	LQQGAGLES(-34.18)PQGQPEPGAAS(34.18)PQR	20	3	795.039
298	162	154	154	Phosphoserine	248;467	320;321;601;602	1498	2552	TSenrich-100ughela-2	15678	802	1407	TSenrich-100ughela-3	14765	IPI00974532;IPI00792065;IPI00936738;IPI00952955;IPI00012280;IPI00644766	IPI00974532	IPI00974532	Putative uncharacterized protein TOR1AIP1;Torsin-1A-interacting protein 1;Putative uncharacterized protein TOR1AIP1;Torsin-1A-interacting protein 1;Torsin A interacting protein 1	TOR1AIP1;TOR1AIP1;TOR1AIP1;TOR1AIP1;RP11-533E19.1-002;TOR1AIP1	68 kDa protein;Uncharacterized protein;Isoform 1 of Torsin-1A-interacting protein 1;Uncharacterized protein;Isoform 2 of Torsin-1A-interacting protein 1;Torsin A interacting protein 1	A8MUM5;Q5JTV8-1;Q5JTV8;C9J3B0;Q5JTV8-2;B1AMI8	0.999883	42.7498	0.997292	30.4569	9.39849e-24	176.52	0.999883	42.7498	5.98274e-18	173.79	0.999999	65.6861	3.024e-56	223.36		3	S	RRGLRDSHSSEED	NEK6;PKA	0.042	3.024e-56	223.36	_GLRDpSHpSpSEEDEASSQTDLSQTISK_	GLRDS(1)HS(1)S(1)EEDEASSQTDLSQTISK	GLRDS(42.75)HS(42.75)S(42.75)EEDEAS(-42.75)S(-42.75)QT(-62.04)DLS(-85.53)QT(-94.49)IS(-102.8)K	5	3	983.047
299	162	156	156	Phosphoserine	248;467	320;321;601;602	1498	2552	TSenrich-100ughela-2	15678	802	1407	TSenrich-100ughela-3	14765	IPI00974532;IPI00792065;IPI00936738;IPI00952955;IPI00012280;IPI00644766	IPI00974532	IPI00974532	Putative uncharacterized protein TOR1AIP1;Torsin-1A-interacting protein 1;Putative uncharacterized protein TOR1AIP1;Torsin-1A-interacting protein 1;Torsin A interacting protein 1	TOR1AIP1;TOR1AIP1;TOR1AIP1;TOR1AIP1;RP11-533E19.1-002;TOR1AIP1	68 kDa protein;Uncharacterized protein;Isoform 1 of Torsin-1A-interacting protein 1;Uncharacterized protein;Isoform 2 of Torsin-1A-interacting protein 1;Torsin A interacting protein 1	A8MUM5;Q5JTV8-1;Q5JTV8;C9J3B0;Q5JTV8-2;B1AMI8	0.999931	42.7498	0.99852	37.3075	9.39849e-24	176.52	0.999931	42.7498	5.98274e-18	173.79	0.999999	61.2332	3.024e-56	223.36		3	S	GLRDSHSSEEDEA	CK2	0.117	3.024e-56	223.36	_GLRDpSHpSpSEEDEASSQTDLSQTISK_	GLRDS(1)HS(1)S(1)EEDEASSQTDLSQTISK	GLRDS(42.75)HS(42.75)S(42.75)EEDEAS(-42.75)S(-42.75)QT(-62.04)DLS(-85.53)QT(-94.49)IS(-102.8)K	7	3	983.047
300	162	157	157	Phosphoserine	248;467	320;321;601;602	1498	2552	TSenrich-100ughela-2	15678	802	1407	TSenrich-100ughela-3	14765	IPI00974532;IPI00792065;IPI00936738;IPI00952955;IPI00012280;IPI00644766	IPI00974532	IPI00974532	Putative uncharacterized protein TOR1AIP1;Torsin-1A-interacting protein 1;Putative uncharacterized protein TOR1AIP1;Torsin-1A-interacting protein 1;Torsin A interacting protein 1	TOR1AIP1;TOR1AIP1;TOR1AIP1;TOR1AIP1;RP11-533E19.1-002;TOR1AIP1	68 kDa protein;Uncharacterized protein;Isoform 1 of Torsin-1A-interacting protein 1;Uncharacterized protein;Isoform 2 of Torsin-1A-interacting protein 1;Torsin A interacting protein 1	A8MUM5;Q5JTV8-1;Q5JTV8;C9J3B0;Q5JTV8-2;B1AMI8	0.999931	42.7498	0.996486	29.339	9.39849e-24	176.52	0.999931	42.7498	5.98274e-18	173.79	0.999999	61.2332	3.024e-56	223.36		3	S	LRDSHSSEEDEAS	CK1;CK2	0.081	3.024e-56	223.36	_GLRDpSHpSpSEEDEASSQTDLSQTISK_	GLRDS(1)HS(1)S(1)EEDEASSQTDLSQTISK	GLRDS(42.75)HS(42.75)S(42.75)EEDEAS(-42.75)S(-42.75)QT(-62.04)DLS(-85.53)QT(-94.49)IS(-102.8)K	8	3	983.047
301	162	135	135	Phosphoserine	884	1113;1114	2946	5512	TSenrich-100ughela-2	14452	2946	5512	TSenrich-100ughela-2	14452	IPI00974532;IPI00792065;IPI00936738;IPI00952955;IPI00012280	IPI00974532	IPI00974532	Putative uncharacterized protein TOR1AIP1;Torsin-1A-interacting protein 1;Putative uncharacterized protein TOR1AIP1;Torsin-1A-interacting protein 1	TOR1AIP1;TOR1AIP1;TOR1AIP1;TOR1AIP1	68 kDa protein;Uncharacterized protein;Isoform 1 of Torsin-1A-interacting protein 1;Uncharacterized protein;Isoform 2 of Torsin-1A-interacting protein 1	A8MUM5;Q5JTV8-1;Q5JTV8;C9J3B0;Q5JTV8-2	1	80.0842					1	80.0842	0.00156503	110.06	8.70623e-09	-79.5171	0.00276966	104.18		2	S	RLQQQHSEQPPLQ			0.00156503	110.06	_LQQQHpSEQPPLQPSPVMpTR_	LQQQHS(1)EQPPLQPS(0.447)PVMT(0.553)R	LQQQHS(80.08)EQPPLQPS(-0.92)PVMT(0.92)R	6	3	787.687
302	163	211	211	Phosphoserine	517	669	1686	2859	TSenrich-100ughela-2	23577	1685	2858	TSenrich-100ughela-1	22138	IPI00012340	IPI00012340	IPI00012340	Pre-mRNA-splicing factor SRp30C;Splicing factor, arginine/serine-rich 9;cDNA FLJ76387, highly similar to Homo sapiens splicing factor, arginine/serine-rich 9 (SFRS9), mRNA	SFRS9;SRP30C	Serine/arginine-rich splicing factor 9	Q13242;A8K3M9	0.999997	55.112	1	65.5226	0.00273794	114.12	0.999997	55.112	0.0181054	94.651	1	66.1834	0.00780844	104.99		2	S	PYQSRGSPHYFSP	CK1;PKA;Proline-directed	0.042	0.00273794	114.12	_GpSPHYFpSPFRPY_	GS(1)PHYFS(0.999)PFRPY(0.001)	GS(55.11)PHY(-39.6)FS(31.68)PFRPY(-31.68)	2	2	807.813
303	163	216	216	Phosphoserine	517	669	1686	2859	TSenrich-100ughela-2	23577	1685	2858	TSenrich-100ughela-1	22138	IPI00012340	IPI00012340	IPI00012340	Pre-mRNA-splicing factor SRp30C;Splicing factor, arginine/serine-rich 9;cDNA FLJ76387, highly similar to Homo sapiens splicing factor, arginine/serine-rich 9 (SFRS9), mRNA	SFRS9;SRP30C	Serine/arginine-rich splicing factor 9	Q13242;A8K3M9	0.999212	31.6784	0.999996	54.7786	0.00273794	114.12	0.999212	31.6784	0.0181054	94.651	0.999974	48.0667	0.00780844	104.99		2	S	GSPHYFSPFRPY_	CDK1;CDK2;Proline-directed	0.0057	0.00273794	114.12	_GpSPHYFpSPFRPY_	GS(1)PHYFS(0.999)PFRPY(0.001)	GS(55.11)PHY(-39.6)FS(31.68)PFRPY(-31.68)	7	2	807.813
304	164	303	303	Phosphoserine	1293	1612	4133	7479	TSenrich-100ughela-1	10735	4131	7475	TSenrich-100ughela-3	11239	IPI00012345;IPI00215879	IPI00012345	IPI00012345	Pre-mRNA-splicing factor SRP55;Splicing factor, arginine/serine-rich 6;cDNA FLJ76823, highly similar to Homo sapiens splicing factor, arginine/serine-rich 6 (SFRS6), mRNA;Pre-mRNA-splicing factor SRP55;Splicing factor, arginine/serine-rich 6	SFRS6;SRP55;SFRS6;SRP55	Isoform SRP55-1 of Serine/arginine-rich splicing factor 6;Isoform SRP55-3 of Serine/arginine-rich splicing factor 6	Q13247-1;Q13247;A8K588;Q13247-3	0.900073	9.54609	0.900073	9.54609	0.224973	62.136					0.941833	12.0955	1.22182e-05	122.47		1	S	SQSRSNSPLPVPP	CAMK2;CK1;Proline-directed	0.042	1.22182e-05	122.47	_SNpSPLPVPPSK_	S(0.1)NS(0.9)PLPVPPSK	S(-9.55)NS(9.55)PLPVPPS(-53.87)K	3	2	601.794
305	165	318	318		431	557;558	1399	2402	TSenrich-100ughela-2	16195	1397	2399	TSenrich-100ughela-2	16226	IPI00607576;IPI00012429;IPI00607692;IPI00945163	IPI00607576	IPI00607576	Protein CG-2;Transmembrane protein C9orf5;Protein CG-2;Transmembrane protein C9orf5;cDNA FLJ57827;Protein CG-2;Transmembrane protein C9orf5;Putative uncharacterized protein C9orf5	C9orf5;C9orf5;C9orf5	Isoform 1 of Transmembrane protein C9orf5;Protein of unknown function UPF0118 family protein;Uncharacterized protein;28 kDa protein	Q9H330-1;Q9H330;Q9H330-2;B4DSW7;Q9H330-4;C9K005	0.513589	3.13052	7.73288e-06	-51.2402	7.30051e-20	166.59	0.513589	3.13052	4.41764e-26	177.3	1.16056e-07	-68.964	1.75066e-10	145.15		3	S	ESAPTLSTSPSPS	GSK3	0.081	4.41764e-26	177.3	_GESAPTLpSpTSPSPSpSPSPTSPSPTLGR_	GES(0.004)APT(0.013)LS(0.514)T(0.304)S(0.501)PS(0.297)PS(0.313)S(0.241)PS(0.255)PT(0.101)S(0.18)PS(0.142)PT(0.135)LGR	GES(-23.47)APT(-16.46)LS(3.13)T(0)S(0)PS(-3.13)PS(-3.13)S(0)PS(0)PT(-8.28)S(-3.13)PS(-4.5)PT(-5.18)LGR	8	3	941.391
306	165	320	320		431	557;558	1399	2402	TSenrich-100ughela-2	16195	1397	2399	TSenrich-100ughela-2	16226	IPI00607576;IPI00012429;IPI00607692;IPI00945163	IPI00607576	IPI00607576	Protein CG-2;Transmembrane protein C9orf5;Protein CG-2;Transmembrane protein C9orf5;cDNA FLJ57827;Protein CG-2;Transmembrane protein C9orf5;Putative uncharacterized protein C9orf5	C9orf5;C9orf5;C9orf5	Isoform 1 of Transmembrane protein C9orf5;Protein of unknown function UPF0118 family protein;Uncharacterized protein;28 kDa protein	Q9H330-1;Q9H330;Q9H330-2;B4DSW7;Q9H330-4;C9K005	0.501169	0	0.00134994	-27.1863	7.30051e-20	166.59	0.501169	0	4.41764e-26	177.3	3.36253e-06	-54.2463	1.75066e-10	145.15		3	S	APTLSTSPSPSSP	CK1;GSK3;NEK6;Proline-directed	0.05	4.41764e-26	177.3	_GESAPTLpSpTSPSPSpSPSPTSPSPTLGR_	GES(0.004)APT(0.013)LS(0.514)T(0.304)S(0.501)PS(0.297)PS(0.313)S(0.241)PS(0.255)PT(0.101)S(0.18)PS(0.142)PT(0.135)LGR	GES(-23.47)APT(-16.46)LS(3.13)T(0)S(0)PS(-3.13)PS(-3.13)S(0)PS(0)PT(-8.28)S(-3.13)PS(-4.5)PT(-5.18)LGR	10	3	941.391
307	165	325	325		431	557;558	1399	2402	TSenrich-100ughela-2	16195	1397	2399	TSenrich-100ughela-2	16226	IPI00607576;IPI00012429;IPI00607692;IPI00945163	IPI00607576	IPI00607576	Protein CG-2;Transmembrane protein C9orf5;Protein CG-2;Transmembrane protein C9orf5;cDNA FLJ57827;Protein CG-2;Transmembrane protein C9orf5;Putative uncharacterized protein C9orf5	C9orf5;C9orf5;C9orf5	Isoform 1 of Transmembrane protein C9orf5;Protein of unknown function UPF0118 family protein;Uncharacterized protein;28 kDa protein	Q9H330-1;Q9H330;Q9H330-2;B4DSW7;Q9H330-4;C9K005	0.241376	0	0.647476	2.62988	7.30051e-20	166.59	0.241376	0	4.41764e-26	177.3	0.00855414	-19.9983	1.75066e-10	145.15		3	S	TSPSPSSPSPTSP	CK1;ERK/MAPK;Polo box;Proline-directed;WW GroupIV	0.0023175	4.41764e-26	177.3	_GESAPTLpSpTSPSPSpSPSPTSPSPTLGR_	GES(0.004)APT(0.013)LS(0.514)T(0.304)S(0.501)PS(0.297)PS(0.313)S(0.241)PS(0.255)PT(0.101)S(0.18)PS(0.142)PT(0.135)LGR	GES(-23.47)APT(-16.46)LS(3.13)T(0)S(0)PS(-3.13)PS(-3.13)S(0)PS(0)PT(-8.28)S(-3.13)PS(-4.5)PT(-5.18)LGR	15	3	941.391
308	165	327	327		431	557;558	1399	2402	TSenrich-100ughela-2	16195	1397	2399	TSenrich-100ughela-2	16226	IPI00607576;IPI00012429;IPI00607692;IPI00945163	IPI00607576	IPI00607576	Protein CG-2;Transmembrane protein C9orf5;Protein CG-2;Transmembrane protein C9orf5;cDNA FLJ57827;Protein CG-2;Transmembrane protein C9orf5;Putative uncharacterized protein C9orf5	C9orf5;C9orf5;C9orf5	Isoform 1 of Transmembrane protein C9orf5;Protein of unknown function UPF0118 family protein;Uncharacterized protein;28 kDa protein	Q9H330-1;Q9H330;Q9H330-2;B4DSW7;Q9H330-4;C9K005	0.255365	0	0.390715	-2.62988	7.30051e-20	166.59	0.255365	0	4.41764e-26	177.3	0.836756	8.16178	1.75066e-10	145.15		3	S	PSPSSPSPTSPSP	CK1;Proline-directed	0.05	4.41764e-26	177.3	_GESAPTLpSpTSPSPSpSPSPTSPSPTLGR_	GES(0.004)APT(0.013)LS(0.514)T(0.304)S(0.501)PS(0.297)PS(0.313)S(0.241)PS(0.255)PT(0.101)S(0.18)PS(0.142)PT(0.135)LGR	GES(-23.47)APT(-16.46)LS(3.13)T(0)S(0)PS(-3.13)PS(-3.13)S(0)PS(0)PT(-8.28)S(-3.13)PS(-4.5)PT(-5.18)LGR	17	3	941.391
309	166	230	230	Phosphoserine	1377	1731	4448	7934	TSenrich-100ughela-2	23376	4448	7934	TSenrich-100ughela-2	23376	IPI00012442	IPI00012442	IPI00012442	ATP-dependent DNA helicase VIII;GAP SH3 domain-binding protein 1;Ras GTPase-activating protein-binding protein 1;cDNA FLJ51772, highly similar to Ras-GTPase-activating protein-binding protein 1 (EC 3.6.1.-);GTPase activating protein (SH3 domain) binding protein 1;Ras-GTPase-activating protein SH3-domain-binding protein variant;cDNA FLJ50206, highly similar to Ras-GTPase-activating protein-binding…	G3BP;G3BP1;DKFZp313K0921;DKFZp686L1159;hCG_39146	Ras GTPase-activating protein-binding protein 1	Q13283;B7Z8K4;E5RH42;E5RI46;E5RIF8;Q32P45;Q53HH4;Q5HYE9;Q5U0Q1;Q6FI03	0.333333	0	0.333333	0	1.57032e-44	206.71	0.333333	0	1.81506e-109	260.92	0.376752	0	9.48708e-74	243.19		1	S	PEDAQKSSSPAPA			1.81506e-109	260.92	_pSSSPAPADIAQTVQEDLR_	S(0.333)S(0.333)S(0.333)PAPADIAQTVQEDLR	S(0)S(0)S(0)PAPADIAQT(-126.06)VQEDLR	1	3	655.637
310	166	231	231	Phosphoserine	1377	1731	4448	7934	TSenrich-100ughela-2	23376	4448	7934	TSenrich-100ughela-2	23376	IPI00012442	IPI00012442	IPI00012442	ATP-dependent DNA helicase VIII;GAP SH3 domain-binding protein 1;Ras GTPase-activating protein-binding protein 1;cDNA FLJ51772, highly similar to Ras-GTPase-activating protein-binding protein 1 (EC 3.6.1.-);GTPase activating protein (SH3 domain) binding protein 1;Ras-GTPase-activating protein SH3-domain-binding protein variant;cDNA FLJ50206, highly similar to Ras-GTPase-activating protein-binding…	G3BP;G3BP1;DKFZp313K0921;DKFZp686L1159;hCG_39146	Ras GTPase-activating protein-binding protein 1	Q13283;B7Z8K4;E5RH42;E5RI46;E5RIF8;Q32P45;Q53HH4;Q5HYE9;Q5U0Q1;Q6FI03	0.333333	0	0.333333	0	1.57032e-44	206.71	0.333333	0	1.81506e-109	260.92	0.376752	0	9.48708e-74	243.19		1	S	EDAQKSSSPAPAD			1.81506e-109	260.92	_pSSSPAPADIAQTVQEDLR_	S(0.333)S(0.333)S(0.333)PAPADIAQTVQEDLR	S(0)S(0)S(0)PAPADIAQT(-126.06)VQEDLR	2	3	655.637
311	166	232	232	Phosphoserine	1377	1731	4448	7934	TSenrich-100ughela-2	23376	4448	7934	TSenrich-100ughela-2	23376	IPI00012442	IPI00012442	IPI00012442	ATP-dependent DNA helicase VIII;GAP SH3 domain-binding protein 1;Ras GTPase-activating protein-binding protein 1;cDNA FLJ51772, highly similar to Ras-GTPase-activating protein-binding protein 1 (EC 3.6.1.-);GTPase activating protein (SH3 domain) binding protein 1;Ras-GTPase-activating protein SH3-domain-binding protein variant;cDNA FLJ50206, highly similar to Ras-GTPase-activating protein-binding…	G3BP;G3BP1;DKFZp313K0921;DKFZp686L1159;hCG_39146	Ras GTPase-activating protein-binding protein 1	Q13283;B7Z8K4;E5RH42;E5RI46;E5RIF8;Q32P45;Q53HH4;Q5HYE9;Q5U0Q1;Q6FI03	0.333333	0	0.333333	0	1.57032e-44	206.71	0.333333	0	1.81506e-109	260.92	0.246496	-1.84247	9.48708e-74	243.19		1	S	DAQKSSSPAPADI	Polo box;Proline-directed	0.00405	1.81506e-109	260.92	_pSSSPAPADIAQTVQEDLR_	S(0.333)S(0.333)S(0.333)PAPADIAQTVQEDLR	S(0)S(0)S(0)PAPADIAQT(-126.06)VQEDLR	3	3	655.637
312	166	149	149	Phosphoserine	1713	2159	5511	9785	TSenrich-100ughela-2	23008	5511	9785	TSenrich-100ughela-2	23008	IPI00012442	IPI00012442	IPI00012442	ATP-dependent DNA helicase VIII;GAP SH3 domain-binding protein 1;Ras GTPase-activating protein-binding protein 1;cDNA FLJ51772, highly similar to Ras-GTPase-activating protein-binding protein 1 (EC 3.6.1.-);GTPase activating protein (SH3 domain) binding protein 1;Ras-GTPase-activating protein SH3-domain-binding protein variant;cDNA FLJ50206, highly similar to Ras-GTPase-activating protein-binding…	G3BP;G3BP1;DKFZp313K0921;DKFZp686L1159;hCG_39146	Ras GTPase-activating protein-binding protein 1	Q13283;B7Z8K4;E5RH42;E5RI46;E5RIF8;Q32P45;Q53HH4;Q5HYE9;Q5U0Q1;Q6FI03	0.993265	21.716	0.290182	-1.94769	0.528202	71.068	0.993265	21.716	0.00267936	106.85						1	S	TEPQEESEEEVEE	CK2	0.117	0.00267936	106.85	_YQDEVFGGFVTEPQEEpSEEEVEEPEER_	YQDEVFGGFVT(0.007)EPQEES(0.993)EEEVEEPEER	Y(-43.49)QDEVFGGFVT(-21.72)EPQEES(21.72)EEEVEEPEER	17	3	1099.45
313	167	530	530		1192	1481;1482	3836	7012	TSenrich-100ughela-3	12959	3835	7011	TSenrich-100ughela-3	12944	IPI00012462;IPI00902564;IPI00945725;IPI00845305;IPI00939283	IPI00012462	IPI00012462	Putative uncharacterized protein EIF2A;65 kDa eukaryotic translation initiation factor 2A;Eukaryotic translation initiation factor 2A;cDNA FLJ58035, highly similar to Homo sapiens eukaryotic translation initiation factor (eIF) 2A (eIF2A), mRNA;cDNA FLJ57962, highly similar to Homo sapiens eukaryotic translation initiation factor (eIF) 2A (eIF2A), mRNA;65 kDa eukaryotic translation initiation fact…	EIF2A;CDA02;EIF2A;MSTP004;MSTP089;CDA02;EIF2A;MSTP004;MSTP089	Eukaryotic translation initiation factor 2A;Isoform 1 of Eukaryotic translation initiation factor 2A;cDNA FLJ58035, highly similar to Homo sapiens eukaryotic translation initiation factor (eIF) 2A (eIF2A), mRNA;cDNA FLJ57962, highly similar to Homo sapiens	C9JWR7;Q9BY44-1;Q9BY44;B4DQ14;B4DF96;Q9BY44-2	0.791189	5.78537									0.791189	5.78537	3.76826e-16	166.91		1	S	EARSDKSPDLAPT	CK1;Proline-directed	0.05	3.76826e-16	166.91	_SDKpSPDLAPTPAPQSTPR_	S(0.209)DKS(0.791)PDLAPTPAPQSTPR	S(-5.79)DKS(5.79)PDLAPT(-52.18)PAPQS(-116.3)T(-116.3)PR	4	3	648.974
314	171	156	156	Phosphoserine	315;485	415;629	1577	2683	TSenrich-100ughela-2	16402	1577	2683	TSenrich-100ughela-2	16402	IPI00013076;IPI00305013	IPI00013076	IPI00013076	FGFR1 oncogene partner;FGFR1 oncogene partner	FGFR1OP;FOP;FGFR1OP;FOP	Isoform 1 of FGFR1 oncogene partner;Isoform 2 of FGFR1 oncogene partner	O95684-1;O95684;O95684-2	0.957577	13.5356	0.903271	9.70825	0.106774	86.16	0.957577	13.5356	4.9994e-06	119.67	0.459728	-0.748465	0.501697	70.322		2	S	DLSDVHSPPKSPE	CDK1;CDK2;CK1;ERK/MAPK;GSK3;Proline-directed	0.0034	4.9994e-06	119.67	_GPTTGEGALDLSDVHpSPPKpSPEGK_	GPTTGEGALDLS(0.042)DVHS(0.958)PPKS(1)PEGK	GPT(-88.18)T(-77.64)GEGALDLS(-13.54)DVHS(13.54)PPKS(49.55)PEGK	16	3	846.038
315	171	160	160	Phosphoserine	315;485	415;629	1577	2683	TSenrich-100ughela-2	16402	1577	2683	TSenrich-100ughela-2	16402	IPI00013076;IPI00305013	IPI00013076	IPI00013076	FGFR1 oncogene partner;FGFR1 oncogene partner	FGFR1OP;FOP;FGFR1OP;FOP	Isoform 1 of FGFR1 oncogene partner;Isoform 2 of FGFR1 oncogene partner	O95684-1;O95684;O95684-2	0.999989	49.5507	0.999663	34.2993	0.106774	86.16	0.999989	49.5507	4.9994e-06	119.67	0.995003	20.3416	0.501697	70.322		2	S	VHSPPKSPEGKTS	CK1;ERK/MAPK;Proline-directed;WW GroupIV	0.0023175	4.9994e-06	119.67	_GPTTGEGALDLSDVHpSPPKpSPEGK_	GPTTGEGALDLS(0.042)DVHS(0.958)PPKS(1)PEGK	GPT(-88.18)T(-77.64)GEGALDLS(-13.54)DVHS(13.54)PPKS(49.55)PEGK	20	3	846.038
316	172	756	756		198	256;257;258;259;260	656	1160	TSenrich-100ughela-2	21531	652	1152	TSenrich-100ughela-2	21077	IPI00013214;IPI00940786;IPI00385434	IPI00013214	IPI00013214	cDNA, FLJ93378, highly similar to Homo sapiens MCM3 minichromosome maintenance deficient 3 (S. cerevisiae) (MCM3), mRNA;cDNA FLJ55599, highly similar to DNA replication licensing factor MCM3;MCM3 minichromosome maintenance deficient 3 (S. cerevisiae), isoform CRA_b;Minichromosome maintenance protein 3 variant;DNA polymerase alpha holoenzyme-associated protein P1;DNA replication licensing factor M…	hCG_22498;MCM3;MCM3;HCC5;MCM3;RP1-108C2.3-004	cDNA FLJ55599, highly similar to DNA replication licensing factor MCM3;DNA replication licensing factor MCM3;Minichromosome maintenance complex component 3	B2R7C5;B4DWW4;Q53HJ4;P25205;B4DS46;B4DUQ9;Q8NHX6;Q7Z6P5	0.535882	1.5162	0.968064	17.4156	2.44156e-13	159.86	0.535882	1.5162	1.91897e-24	182.8	0.961784	16.1551	1.48164e-12	154.11		1	S	YDPYDFSDTEEEM	CK2	0.117	1.91897e-24	182.8	_DGDSYDPYDFpSDTEEEMPQVHTPK_	DGDSYDPY(0.378)DFS(0.536)DT(0.085)EEEMPQVHTPK	DGDS(-36.09)Y(-32.66)DPY(-1.52)DFS(1.52)DT(-7.98)EEEMPQVHT(-31.36)PK	11	3	961.372
317	172	717	717		1203	1495	3863	7050	TSenrich-100ughela-2	9189	3862	7049	TSenrich-100ughela-3	7962	IPI00013214;IPI00940786;IPI00385434	IPI00013214	IPI00013214	cDNA, FLJ93378, highly similar to Homo sapiens MCM3 minichromosome maintenance deficient 3 (S. cerevisiae) (MCM3), mRNA;cDNA FLJ55599, highly similar to DNA replication licensing factor MCM3;MCM3 minichromosome maintenance deficient 3 (S. cerevisiae), isoform CRA_b;Minichromosome maintenance protein 3 variant;DNA polymerase alpha holoenzyme-associated protein P1;DNA replication licensing factor M…	hCG_22498;MCM3;MCM3;HCC5;MCM3;RP1-108C2.3-004	cDNA FLJ55599, highly similar to DNA replication licensing factor MCM3;DNA replication licensing factor MCM3;Minichromosome maintenance complex component 3	B2R7C5;B4DWW4;Q53HJ4;P25205;B4DS46;B4DUQ9;Q8NHX6;Q7Z6P5	0.894744	9.53341					0.894744	9.53341	0.68215	39.337	0.998015	27.0187	0.0121548	93.052		2	S	KRSEDESETEDEE	CK1;CK2	0.117	0.0121548	93.052	_SEDEpSEpTEDEEEKSQEDQEQK_	S(0.033)EDES(0.895)ET(0.809)EDEEEKS(0.264)QEDQEQK	S(-16.21)EDES(9.53)ET(6.08)EDEEEKS(-6.08)QEDQEQK	5	3	896.646
318	173	395	395	Phosphoserine	497	644	1612	2749	TSenrich-100ughela-3	14013	1611	2745	TSenrich-100ughela-3	13716	IPI00013290;IPI00939776;IPI00885081;IPI00645387	IPI00013290	IPI00013290	Hepatoma-derived growth factor 2;Hepatoma-derived growth factor-related protein 2;Hepatoma-derived growth factor 2;Hepatoma-derived growth factor-related protein 2;Putative uncharacterized protein ENSP00000403390;Hepatoma-derived growth factor-related protein 2 isoform 1 variant	HDGF2;HDGFRP2;UNQ785/PRO1604;HDGF2;HDGFRP2;UNQ785/PRO1604	75 kDa protein;Isoform 1 of Hepatoma-derived growth factor-related protein 2;Isoform 2 of Hepatoma-derived growth factor-related protein 2;Hepatoma-derived growth factor-related protein 2 isoform 1 variant	Q7Z4V5-1;Q7Z4V5;Q7Z4V5-2;C9JEE1;Q59H67	1	40.061									1	40.061	2.85689e-58	228.01		4	S	RGRGPPSSSDSEP	CK2;GSK3	0.081	2.85689e-58	228.01	_GRGPPpSpSpSDpSEPEAELER_	GRGPPS(1)S(1)S(1)DS(1)EPEAELER	GRGPPS(40.06)S(40.06)S(40.06)DS(40.06)EPEAELER	6	3	740.583
319	173	396	396	Phosphoserine	497	644	1612	2749	TSenrich-100ughela-3	14013	1611	2745	TSenrich-100ughela-3	13716	IPI00013290;IPI00939776;IPI00885081;IPI00645387	IPI00013290	IPI00013290	Hepatoma-derived growth factor 2;Hepatoma-derived growth factor-related protein 2;Hepatoma-derived growth factor 2;Hepatoma-derived growth factor-related protein 2;Putative uncharacterized protein ENSP00000403390;Hepatoma-derived growth factor-related protein 2 isoform 1 variant	HDGF2;HDGFRP2;UNQ785/PRO1604;HDGF2;HDGFRP2;UNQ785/PRO1604	75 kDa protein;Isoform 1 of Hepatoma-derived growth factor-related protein 2;Isoform 2 of Hepatoma-derived growth factor-related protein 2;Hepatoma-derived growth factor-related protein 2 isoform 1 variant	Q7Z4V5-1;Q7Z4V5;Q7Z4V5-2;C9JEE1;Q59H67	1	40.061									1	40.061	2.85689e-58	228.01		4	S	GRGPPSSSDSEPE			2.85689e-58	228.01	_GRGPPpSpSpSDpSEPEAELER_	GRGPPS(1)S(1)S(1)DS(1)EPEAELER	GRGPPS(40.06)S(40.06)S(40.06)DS(40.06)EPEAELER	7	3	740.583
320	173	397	397	Phosphoserine	497	644	1612	2749	TSenrich-100ughela-3	14013	1611	2745	TSenrich-100ughela-3	13716	IPI00013290;IPI00939776;IPI00885081;IPI00645387	IPI00013290	IPI00013290	Hepatoma-derived growth factor 2;Hepatoma-derived growth factor-related protein 2;Hepatoma-derived growth factor 2;Hepatoma-derived growth factor-related protein 2;Putative uncharacterized protein ENSP00000403390;Hepatoma-derived growth factor-related protein 2 isoform 1 variant	HDGF2;HDGFRP2;UNQ785/PRO1604;HDGF2;HDGFRP2;UNQ785/PRO1604	75 kDa protein;Isoform 1 of Hepatoma-derived growth factor-related protein 2;Isoform 2 of Hepatoma-derived growth factor-related protein 2;Hepatoma-derived growth factor-related protein 2 isoform 1 variant	Q7Z4V5-1;Q7Z4V5;Q7Z4V5-2;C9JEE1;Q59H67	1	40.061									1	40.061	2.85689e-58	228.01		4	S	RGPPSSSDSEPEA	CK2	0.117	2.85689e-58	228.01	_GRGPPpSpSpSDpSEPEAELER_	GRGPPS(1)S(1)S(1)DS(1)EPEAELER	GRGPPS(40.06)S(40.06)S(40.06)DS(40.06)EPEAELER	8	3	740.583
321	173	399	399	Phosphoserine	497	644	1612	2749	TSenrich-100ughela-3	14013	1611	2745	TSenrich-100ughela-3	13716	IPI00013290;IPI00939776;IPI00885081;IPI00645387	IPI00013290	IPI00013290	Hepatoma-derived growth factor 2;Hepatoma-derived growth factor-related protein 2;Hepatoma-derived growth factor 2;Hepatoma-derived growth factor-related protein 2;Putative uncharacterized protein ENSP00000403390;Hepatoma-derived growth factor-related protein 2 isoform 1 variant	HDGF2;HDGFRP2;UNQ785/PRO1604;HDGF2;HDGFRP2;UNQ785/PRO1604	75 kDa protein;Isoform 1 of Hepatoma-derived growth factor-related protein 2;Isoform 2 of Hepatoma-derived growth factor-related protein 2;Hepatoma-derived growth factor-related protein 2 isoform 1 variant	Q7Z4V5-1;Q7Z4V5;Q7Z4V5-2;C9JEE1;Q59H67	1	40.061									1	40.061	2.85689e-58	228.01		4	S	PPSSSDSEPEAEL	CK1;CK2	0.081	2.85689e-58	228.01	_GRGPPpSpSpSDpSEPEAELER_	GRGPPS(1)S(1)S(1)DS(1)EPEAELER	GRGPPS(40.06)S(40.06)S(40.06)DS(40.06)EPEAELER	10	3	740.583
322	174	57	57	Phosphoserine	1262	1571	4035	7348	TSenrich-100ughela-3	11298	4034	7347	TSenrich-100ughela-3	10431	IPI00013297	IPI00013297	IPI00013297	28 kDa heat- and acid-stable phosphoprotein;PDGFA-associated protein 1;PDGF-associated protein	HASPP28;PDAP1	28 kDa heat- and acid-stable phosphoprotein	Q13442	0.791968	5.80603									0.791968	5.80603	0.00164274	121.55		2	S	PKKEKKSLDSDES	AURORA;AURORA-1	0.020748	0.00164274	121.55	_pSLDSDEpSEDEEDDYQQK_	S(0.792)LDS(0.208)DES(1)EDEEDDYQQK	S(5.81)LDS(-5.81)DES(44.62)EDEEDDY(-44.89)QQK	1	2	1096.36
323	174	63	63	Phosphoserine	1262	1571	4035	7348	TSenrich-100ughela-3	11298	4034	7347	TSenrich-100ughela-3	10431	IPI00013297	IPI00013297	IPI00013297	28 kDa heat- and acid-stable phosphoprotein;PDGFA-associated protein 1;PDGF-associated protein	HASPP28;PDAP1	28 kDa heat- and acid-stable phosphoprotein	Q13442	0.999921	44.6239									0.999921	44.6239	0.00164274	121.55		2	S	SLDSDESEDEEDD	CK1;CK2	0.081	0.00164274	121.55	_pSLDSDEpSEDEEDDYQQK_	S(0.792)LDS(0.208)DES(1)EDEEDDYQQK	S(5.81)LDS(-5.81)DES(44.62)EDEEDDY(-44.89)QQK	7	2	1096.36
324	175	407	407		1153	1433	3719	6833	TSenrich-100ughela-1	13133	3718	6832	TSenrich-100ughela-1	13068	IPI00651657;IPI00013384;IPI00217124;IPI00874022	IPI00651657	IPI00651657	Kinase suppressor of Ras 1;Kinase suppressor of Ras 1;Kinase suppressor of Ras 1;Putative uncharacterized protein KSR1	KSR;KSR1;KSR;KSR1;KSR;KSR1;KSR1	Isoform 1 of Kinase suppressor of Ras 1;Isoform 2 of Kinase suppressor of Ras 1;Isoform 3 of Kinase suppressor of Ras 1;kinase suppressor of Ras 1	Q8IVT5-1;Q8IVT5;Q8IVT5-2;Q8IVT5-3;A8MY87	0.619429	2.88724	0.619429	2.88724	0.0686891	80.716										1	S	RTESVPSDINNPV	CK1	0.081	0.0686891	80.716	_RTESVPpSDINNPVDR_	RT(0.062)ES(0.319)VPS(0.619)DINNPVDR	RT(-10)ES(-2.89)VPS(2.89)DINNPVDR	7	3	593.607
325	176	259	259	Phosphoserine	1346	1687;1688	4325	7746	TSenrich-100ughela-2	14975	4320	7738	TSenrich-100ughela-1	13966	IPI00013439	IPI00013439	IPI00013439	Transcription factor jun-B;Jun B proto-oncogene variant;cDNA, FLJ94337, Homo sapiens jun B proto-oncogene (JUNB), mRNA;Jun B proto-oncogene	JUNB;hCG_172481	Transcription factor jun-B	P17275;Q53HP8;Q5U079	1	94.1208	1	78.9839	1.48284e-10	155.05	1	94.1208	2.96237e-10	149.1	0.999994	51.7693	0.00046286	126.46		2	S	DATPPVSPINMED	CK1;ERK/MAPK;Proline-directed;WW GroupIV	0.0023175	1.48284e-10	155.05	_SRDApTPPVpSPINMEDQER_	S(0.01)RDAT(0.99)PPVS(1)PINMEDQER	S(-20.17)RDAT(20.17)PPVS(94.12)PINMEDQER	9	3	734.636
326	177	885	885	Phosphoserine	378	496;497	1241	2167	TSenrich-100ughela-2	16854	1235	2156	TSenrich-100ughela-2	16351	IPI00013452;IPI00909383	IPI00013452	IPI00013452	Bifunctional aminoacyl-tRNA synthetase;Cell proliferation-inducing gene 32 protein;Glutamate--tRNA ligase;Glutamyl-tRNA synthetase;Proline--tRNA ligase;Prolyl-tRNA synthetase;cDNA FLJ58269, highly similar to Bifunctional aminoacyl-tRNA synthetase;EPRS protein;cDNA FLJ56021, highly similar to Bifunctional aminoacyl-tRNA synthetase[Includes: Glutamyl-tRNA synthetase (EC 6.1.1.17)	EPRS;GLNS;PARS;PIG32;QARS;QPRS	Bifunctional aminoacyl-tRNA synthetase;cDNA FLJ56021, highly similar to Bifunctional aminoacyl-tRNA synthetase[Includes: Glutamyl-tRNA synthetase (Fragment)	P07814;B4DP50;Q3KQZ8;B4DKX5	0.435164	0	0.419401	3.41045	0.000215515	121.21	0.435164	0	5.47395e-16	164.58	0.443024	0.750638	3.16109e-07	144.02		2	S	LSQSSDSSPTRNS	CK1	0.081	5.47395e-16	164.58	_EYIPGQPPLSQSSDpSSPpTR_	EYIPGQPPLS(0.133)QS(0.366)S(0.211)DS(0.435)S(0.435)PT(0.419)R	EY(-53.9)IPGQPPLS(-6.87)QS(-2.13)S(-2.13)DS(0)S(0)PT(0.75)R	15	3	735.975
327	177	886	886	Phosphoserine	378	496;497	1241	2167	TSenrich-100ughela-2	16854	1235	2156	TSenrich-100ughela-2	16351	IPI00013452;IPI00909383	IPI00013452	IPI00013452	Bifunctional aminoacyl-tRNA synthetase;Cell proliferation-inducing gene 32 protein;Glutamate--tRNA ligase;Glutamyl-tRNA synthetase;Proline--tRNA ligase;Prolyl-tRNA synthetase;cDNA FLJ58269, highly similar to Bifunctional aminoacyl-tRNA synthetase;EPRS protein;cDNA FLJ56021, highly similar to Bifunctional aminoacyl-tRNA synthetase[Includes: Glutamyl-tRNA synthetase (EC 6.1.1.17)	EPRS;GLNS;PARS;PIG32;QARS;QPRS	Bifunctional aminoacyl-tRNA synthetase;cDNA FLJ56021, highly similar to Bifunctional aminoacyl-tRNA synthetase[Includes: Glutamyl-tRNA synthetase (Fragment)	P07814;B4DP50;Q3KQZ8;B4DKX5	0.435164	0	0.419401	3.41045	0.000215515	121.21	0.435164	0	5.47395e-16	164.58	0.454451	-0.750638	3.16109e-07	144.02		2	S	SQSSDSSPTRNSE	CDK1;CDK2;CK1;Polo box;Proline-directed	0.00405	5.47395e-16	164.58	_EYIPGQPPLSQSSDpSSPpTR_	EYIPGQPPLS(0.133)QS(0.366)S(0.211)DS(0.435)S(0.435)PT(0.419)R	EY(-53.9)IPGQPPLS(-6.87)QS(-2.13)S(-2.13)DS(0)S(0)PT(0.75)R	16	3	735.975
328	178	200	200	Phosphoserine	1435	1808	4651	8274	TSenrich-100ughela-1	14010	4651	8274	TSenrich-100ughela-1	14010	IPI00013455;IPI00027172;IPI00217113;IPI00384485;IPI00788776	IPI00013455	IPI00013455	CAP-Gly domain-containing linker protein 1;Cytoplasmic linker protein 1;Cytoplasmic linker protein 170 alpha-2;Reed-Sternberg intermediate filament-associated protein;Restin;Cytoplasmic linker protein CLIP-170;CAP-Gly domain-containing linker protein 1;Cytoplasmic linker protein 1;Cytoplasmic linker protein 170 alpha-2;Reed-Sternberg intermediate filament-associated protein;Restin;CLIP1 protein;C…	CLIP1;CYLN1;RSN;CLIP-170;CLIP1;CYLN1;RSN;CLIP1;CYLN1;RSN;CLIP1	Isoform 1 of CAP-Gly domain-containing linker protein 1;Isoform 2 of CAP-Gly domain-containing linker protein 1;Isoform 3 of CAP-Gly domain-containing linker protein 1;CLIP1 protein (Fragment);37 kDa protein	P30622-3;P30622;O43667;P30622-1;Q6P5Z9;P30622-2;Q86WU4	0.999985	48.1305	0.999985	48.1305	0.00122579	127.11										2	S	ESISNLSEAGSIK	CK1;GSK3	0.081	0.00122579	127.11	_TASESISNLpSEAGpSIK_	TASESISNLS(1)EAGS(1)IK	T(-78.4)AS(-79.01)ES(-79.61)IS(-48.13)NLS(48.13)EAGS(70.48)IK	10	2	877.368
329	178	204	204	Phosphoserine	1435	1808	4651	8274	TSenrich-100ughela-1	14010	4651	8274	TSenrich-100ughela-1	14010	IPI00013455;IPI00027172;IPI00217113;IPI00384485;IPI00788776	IPI00013455	IPI00013455	CAP-Gly domain-containing linker protein 1;Cytoplasmic linker protein 1;Cytoplasmic linker protein 170 alpha-2;Reed-Sternberg intermediate filament-associated protein;Restin;Cytoplasmic linker protein CLIP-170;CAP-Gly domain-containing linker protein 1;Cytoplasmic linker protein 1;Cytoplasmic linker protein 170 alpha-2;Reed-Sternberg intermediate filament-associated protein;Restin;CLIP1 protein;C…	CLIP1;CYLN1;RSN;CLIP-170;CLIP1;CYLN1;RSN;CLIP1;CYLN1;RSN;CLIP1	Isoform 1 of CAP-Gly domain-containing linker protein 1;Isoform 2 of CAP-Gly domain-containing linker protein 1;Isoform 3 of CAP-Gly domain-containing linker protein 1;CLIP1 protein (Fragment);37 kDa protein	P30622-3;P30622;O43667;P30622-1;Q6P5Z9;P30622-2;Q86WU4	1	70.4813	1	70.4813	0.00122579	127.11										2	S	NLSEAGSIKKGER	CK1	0.143	0.00122579	127.11	_TASESISNLpSEAGpSIK_	TASESISNLS(1)EAGS(1)IK	T(-78.4)AS(-79.01)ES(-79.61)IS(-48.13)NLS(48.13)EAGS(70.48)IK	14	2	877.368
330	180	109	109	Phosphoserine	724;725;905	912;913;914;915;1139;1140	3009	5600	TSenrich-100ughela-2	16217	2383	4250	TSenrich-100ughela-1	14510	IPI00873899;IPI00013495;IPI00792186	IPI00873899	IPI00873899	ATP-binding cassette 50;ATP-binding cassette sub-family F member 1;TNF-alpha-stimulated ABC protein;ATP-binding cassette sub-family F (GCN20) member 1;ATP-binding cassette, sub-family F (GCN20), member 1;ATP-binding cassette, sub-family F, member 1 variant;ATP-binding cassette 50;ATP-binding cassette sub-family F member 1;TNF-alpha-stimulated ABC protein;ABC50 protein;ATP-binding cassette sub-fam…	ABC50;ABCF1;DADB-129D20.7-001;DAMA-178G23.9-001;DAMC-83F13.6-001;DASS-182C6.1-001;ABC50;ABCF1;DADB-129D20.7-002;DAMA-178G23.9-002;DAMC-83F13.6-002;DASS-182C6.1-002;hCG_26012;ABCF1;DADB-129D20.7-003;DAMA-178G23.9-003;DAMC-83F13.6-003;DAQB-256B5.2-003;DASS-182C6.1-003;XXbac-BCX98J21.1-003;XXbac-BPG249D20.4-003	Isoform 1 of ATP-binding cassette sub-family F member 1;Isoform 2 of ATP-binding cassette sub-family F member 1;cDNA FLJ56536, highly similar to ATP-binding cassette sub-family F member 1	Q8NE71-1;Q8NE71;A2BF75;Q59F96;Q8NE71-2;Q2L6I2;A0PJ72;B4DNU2;Q5STZ8	0.842954	7.29854	0.499998	0	4.25188e-17	173.65	0.842954	7.29854	1.43598e-16	172.29	0.853153	7.49901	2.96107e-10	147.19		1	S	KLSVPTSDEEDEV	CK1;CK2	0.117	4.25188e-17	173.65	_LSVPTpSDEEDEVPAPKPR_	LSVPT(0.157)S(0.843)DEEDEVPAPKPR	LS(-44.85)VPT(-7.3)S(7.3)DEEDEVPAPKPR	6	2	1023.48
331	180	22	22	Phosphoserine	1056	1316	3387	6225	TSenrich-100ughela-2	17871	3386	6224	TSenrich-100ughela-1	16446	IPI00873899;IPI00013495;IPI00792186;IPI00642673	IPI00873899	IPI00873899	ATP-binding cassette 50;ATP-binding cassette sub-family F member 1;TNF-alpha-stimulated ABC protein;ATP-binding cassette sub-family F (GCN20) member 1;ATP-binding cassette, sub-family F (GCN20), member 1;ATP-binding cassette, sub-family F, member 1 variant;ATP-binding cassette 50;ATP-binding cassette sub-family F member 1;TNF-alpha-stimulated ABC protein;ABC50 protein;ATP-binding cassette sub-fam…	ABC50;ABCF1;DADB-129D20.7-001;DAMA-178G23.9-001;DAMC-83F13.6-001;DASS-182C6.1-001;ABC50;ABCF1;DADB-129D20.7-002;DAMA-178G23.9-002;DAMC-83F13.6-002;DASS-182C6.1-002;hCG_26012;ABCF1;DADB-129D20.7-003;DAMA-178G23.9-003;DAMC-83F13.6-003;DAQB-256B5.2-003;DASS-182C6.1-003;XXbac-BCX98J21.1-003;XXbac-BPG249D20.4-003;ABCF1;DADB-129D20.7-004;DAMA-178G23.9-004;DAMC-83F13.6-004;DAQB-256B5.2-004;DASS-182C6.1-…	Isoform 1 of ATP-binding cassette sub-family F member 1;Isoform 2 of ATP-binding cassette sub-family F member 1;cDNA FLJ56536, highly similar to ATP-binding cassette sub-family F member 1;ATP-binding cassette, sub-family F (GCN20), member 1	Q8NE71-1;Q8NE71;A2BF75;Q59F96;Q8NE71-2;Q2L6I2;A0PJ72;B4DNU2;Q5STZ8;Q5STZ7	0.727694	9.04013	0.503747	1.31259	3.78011e-07	141.52	0.727694	9.04013	0.00136142	106.92	0.756413	6.82918	9.05004e-07	133.95		1	S	GDGESTSPSDKVV	CK2;Proline-directed	0.05	3.78011e-07	141.52	_QQPPEPEWIGDGESTpSPSDK_	QQPPEPEWIGDGES(0.091)T(0.091)S(0.728)PS(0.091)DK	QQPPEPEWIGDGES(-9.04)T(-9.04)S(9.04)PS(-9.04)DK	16	3	755.318
332	181	323	323		1017	1275	3286	6056	TSenrich-100ughela-1	17079	3286	6056	TSenrich-100ughela-1	17079	IPI00760962;IPI00470559;IPI00760928;IPI00013537	IPI00760962	IPI00760962	Ankyrin repeat domain-containing protein 25;KN motif and ankyrin repeat domain-containing protein 2;Matrix-remodeling-associated protein 3;SRC-1-interacting protein;Ankyrin repeat domain-containing protein 25;KN motif and ankyrin repeat domain-containing protein 2;Matrix-remodeling-associated protein 3;SRC-1-interacting protein;Ankyrin repeat domain-containing protein 25;KN motif and ankyrin repe…	ANKRD25;KANK2;KIAA1518;MXRA3;SIP;ANKRD25;KANK2;KIAA1518;MXRA3;SIP;ANKRD25;KANK2;KIAA1518;MXRA3;SIP	Isoform 2 of KN motif and ankyrin repeat domain-containing protein 2;Isoform 1 of KN motif and ankyrin repeat domain-containing protein 2;Isoform 3 of KN motif and ankyrin repeat domain-containing protein 2;cDNA FLJ20004 fis, clone ADKA02391	Q63ZY3-2;Q63ZY3;Q63ZY3-1;Q63ZY3-3;Q9NXX5	0.982897	17.5943	0.982897	17.5943	0.11135	91.573										1	S	AWPPPDSPVRVDT	CDK1;CDK2;ERK/MAPK;Proline-directed;WW GroupIV	0.0023175	0.11135	91.573	_QADPQPQAWPPPDpSPVRVDTVR_	QADPQPQAWPPPDS(0.983)PVRVDT(0.017)VR	QADPQPQAWPPPDS(17.59)PVRVDT(-17.59)VR	14	3	846.071
333	182	739	739		172	224	570	1036	TSenrich-100ughela-2	14807	570	1036	TSenrich-100ughela-2	14807	IPI00852584;IPI00853412;IPI00013651	IPI00852584	IPI00852584	Proline-rich protein 8;RNA-binding motif protein 33;RNA-binding protein 33;cDNA FLJ60909, highly similar to Proline-rich protein 8	PRR8;RBM33	Isoform 1 of RNA-binding protein 33;cDNA FLJ60909, highly similar to Proline-rich protein 8;49 kDa protein	Q96EV2-1;Q96EV2;B4DVQ2	0.458555	0	0.455025	0	0.311051	67.277	0.458555	0	0.00576857	99.787						1	S	QVKPIVSASPPSR			0.00576857	99.787	_CSATPSAQVKPIVpSASPPSR_	CSATPSAQVKPIVS(0.459)AS(0.459)PPS(0.083)R	CS(-91.13)AT(-68.57)PS(-37.53)AQVKPIVS(0)AS(0)PPS(-7.43)R	14	3	707.345
334	182	741	741	Phosphoserine	172	224	570	1036	TSenrich-100ughela-2	14807	570	1036	TSenrich-100ughela-2	14807	IPI00852584;IPI00853412;IPI00013651	IPI00852584	IPI00852584	Proline-rich protein 8;RNA-binding motif protein 33;RNA-binding protein 33;cDNA FLJ60909, highly similar to Proline-rich protein 8	PRR8;RBM33	Isoform 1 of RNA-binding protein 33;cDNA FLJ60909, highly similar to Proline-rich protein 8;49 kDa protein	Q96EV2-1;Q96EV2;B4DVQ2	0.458555	0	0.455025	0	0.311051	67.277	0.458555	0	0.00576857	99.787						1	S	KPIVSASPPSRAV	Proline-directed	0.05	0.00576857	99.787	_CSATPSAQVKPIVpSASPPSR_	CSATPSAQVKPIVS(0.459)AS(0.459)PPS(0.083)R	CS(-91.13)AT(-68.57)PS(-37.53)AQVKPIVS(0)AS(0)PPS(-7.43)R	16	3	707.345
335	183	20	20	Phosphoserine	346	453	1119	1955	TSenrich-100ughela-3	12565	1119	1955	TSenrich-100ughela-3	12565	IPI00013721	IPI00013721	IPI00013721	PRP4 kinase;PRP4 pre-mRNA-processing factor 4 homolog;Serine/threonine-protein kinase PRP4 homolog;cDNA FLJ51417, highly similar to Serine/threonine-protein kinase PRP4 homolog (EC 2.7.11.1);HCG1820375, isoform CRA_a;Protein-serine/threonine kinase	KIAA0536;PRP4;PRP4H;PRP4K;PRPF4B;hCG_1820375	Serine/threonine-protein kinase PRP4 homolog	Q13523;B4DZQ5;D3DWH5;Q15456	0.999996	53.9473									0.999996	53.9473	0.000498351	117.31		2	S	EMEDANSEKSINE			0.000498351	117.31	_EQPEMEDANpSEKpSINEENGEVSEDQSQNK_	EQPEMEDANS(1)EKS(1)INEENGEVSEDQSQNK	EQPEMEDANS(53.95)EKS(61.59)INEENGEVS(-53.95)EDQS(-82.75)QNK	10	3	1152.11
336	183	23	23	Phosphoserine	346	453	1119	1955	TSenrich-100ughela-3	12565	1119	1955	TSenrich-100ughela-3	12565	IPI00013721	IPI00013721	IPI00013721	PRP4 kinase;PRP4 pre-mRNA-processing factor 4 homolog;Serine/threonine-protein kinase PRP4 homolog;cDNA FLJ51417, highly similar to Serine/threonine-protein kinase PRP4 homolog (EC 2.7.11.1);HCG1820375, isoform CRA_a;Protein-serine/threonine kinase	KIAA0536;PRP4;PRP4H;PRP4K;PRPF4B;hCG_1820375	Serine/threonine-protein kinase PRP4 homolog	Q13523;B4DZQ5;D3DWH5;Q15456	0.999999	61.5853									0.999999	61.5853	0.000498351	117.31		2	S	DANSEKSINEENG	CK1;CK2;PLK;PLK1	0.0027378	0.000498351	117.31	_EQPEMEDANpSEKpSINEENGEVSEDQSQNK_	EQPEMEDANS(1)EKS(1)INEENGEVSEDQSQNK	EQPEMEDANS(53.95)EKS(61.59)INEENGEVS(-53.95)EDQS(-82.75)QNK	13	3	1152.11
337	183	427	427	Phosphoserine	1250	1559	4004	7284	TSenrich-100ughela-3	14243	4004	7284	TSenrich-100ughela-3	14243	IPI00013721	IPI00013721	IPI00013721	PRP4 kinase;PRP4 pre-mRNA-processing factor 4 homolog;Serine/threonine-protein kinase PRP4 homolog;cDNA FLJ51417, highly similar to Serine/threonine-protein kinase PRP4 homolog (EC 2.7.11.1);HCG1820375, isoform CRA_a;Protein-serine/threonine kinase	KIAA0536;PRP4;PRP4H;PRP4K;PRPF4B;hCG_1820375	Serine/threonine-protein kinase PRP4 homolog	Q13523;B4DZQ5;D3DWH5;Q15456	1	97.0373									1	97.0373	0.0364449	97.037		3	S	LSRRERSKDASPI	CAMK2;GSK3	0.042	0.0364449	97.037	_pSKDApSPINRWpSPTR_	S(1)KDAS(1)PINRWS(0.998)PT(0.002)R	S(97.04)KDAS(53.4)PINRWS(26.44)PT(-26.44)R	1	2	927.87
338	183	431	431	Phosphoserine	1250	1559	4004	7284	TSenrich-100ughela-3	14243	4004	7284	TSenrich-100ughela-3	14243	IPI00013721	IPI00013721	IPI00013721	PRP4 kinase;PRP4 pre-mRNA-processing factor 4 homolog;Serine/threonine-protein kinase PRP4 homolog;cDNA FLJ51417, highly similar to Serine/threonine-protein kinase PRP4 homolog (EC 2.7.11.1);HCG1820375, isoform CRA_a;Protein-serine/threonine kinase	KIAA0536;PRP4;PRP4H;PRP4K;PRPF4B;hCG_1820375	Serine/threonine-protein kinase PRP4 homolog	Q13523;B4DZQ5;D3DWH5;Q15456	0.999995	53.403									0.999995	53.403	0.0364449	97.037		3	S	ERSKDASPINRWS	CK1;Proline-directed	0.05	0.0364449	97.037	_pSKDApSPINRWpSPTR_	S(1)KDAS(1)PINRWS(0.998)PT(0.002)R	S(97.04)KDAS(53.4)PINRWS(26.44)PT(-26.44)R	5	2	927.87
339	183	437	437	Phosphoserine	1250	1559	4004	7284	TSenrich-100ughela-3	14243	4004	7284	TSenrich-100ughela-3	14243	IPI00013721	IPI00013721	IPI00013721	PRP4 kinase;PRP4 pre-mRNA-processing factor 4 homolog;Serine/threonine-protein kinase PRP4 homolog;cDNA FLJ51417, highly similar to Serine/threonine-protein kinase PRP4 homolog (EC 2.7.11.1);HCG1820375, isoform CRA_a;Protein-serine/threonine kinase	KIAA0536;PRP4;PRP4H;PRP4K;PRPF4B;hCG_1820375	Serine/threonine-protein kinase PRP4 homolog	Q13523;B4DZQ5;D3DWH5;Q15456	0.997734	26.4376									0.997734	26.4376	0.0364449	97.037		3	S	SPINRWSPTRRRS	CDK1;CDK2;PKA;Proline-directed	0.0057	0.0364449	97.037	_pSKDApSPINRWpSPTR_	S(1)KDAS(1)PINRWS(0.998)PT(0.002)R	S(97.04)KDAS(53.4)PINRWS(26.44)PT(-26.44)R	11	2	927.87
340	183	578	578	Phosphoserine	1542	1945	4978	8832	TSenrich-100ughela-3	16497	4978	8832	TSenrich-100ughela-3	16497	IPI00013721	IPI00013721	IPI00013721	PRP4 kinase;PRP4 pre-mRNA-processing factor 4 homolog;Serine/threonine-protein kinase PRP4 homolog;cDNA FLJ51417, highly similar to Serine/threonine-protein kinase PRP4 homolog (EC 2.7.11.1);HCG1820375, isoform CRA_a;Protein-serine/threonine kinase	KIAA0536;PRP4;PRP4H;PRP4K;PRPF4B;hCG_1820375	Serine/threonine-protein kinase PRP4 homolog	Q13523;B4DZQ5;D3DWH5;Q15456	0.92426	10.8645									0.92426	10.8645	0.0139359	98.79		2	S	SSTRTRSPSPDDI	CAMK2;CK1;PKA/AKT;Proline-directed	0.00111111	0.0139359	98.79	_TRpSPpSPDDILER_	T(0.076)RS(0.924)PS(1)PDDILER	T(-10.86)RS(10.86)PS(44.09)PDDILER	3	2	773.321
341	183	580	580	Phosphoserine	1542	1945	4978	8832	TSenrich-100ughela-3	16497	4978	8832	TSenrich-100ughela-3	16497	IPI00013721	IPI00013721	IPI00013721	PRP4 kinase;PRP4 pre-mRNA-processing factor 4 homolog;Serine/threonine-protein kinase PRP4 homolog;cDNA FLJ51417, highly similar to Serine/threonine-protein kinase PRP4 homolog (EC 2.7.11.1);HCG1820375, isoform CRA_a;Protein-serine/threonine kinase	KIAA0536;PRP4;PRP4H;PRP4K;PRPF4B;hCG_1820375	Serine/threonine-protein kinase PRP4 homolog	Q13523;B4DZQ5;D3DWH5;Q15456	0.999964	44.0871									0.999964	44.0871	0.0139359	98.79		2	S	TRTRSPSPDDILE	CAMK2;CK1;CK2;PKA/AKT;Proline-directed	0.001764	0.0139359	98.79	_TRpSPpSPDDILER_	T(0.076)RS(0.924)PS(1)PDDILER	T(-10.86)RS(10.86)PS(44.09)PDDILER	5	2	773.321
342	183	518	518	Phosphoserine	1594	2014	5146	9119	TSenrich-100ughela-2	25395	5145	9116	TSenrich-100ughela-1	23781	IPI00013721	IPI00013721	IPI00013721	PRP4 kinase;PRP4 pre-mRNA-processing factor 4 homolog;Serine/threonine-protein kinase PRP4 homolog;cDNA FLJ51417, highly similar to Serine/threonine-protein kinase PRP4 homolog (EC 2.7.11.1);HCG1820375, isoform CRA_a;Protein-serine/threonine kinase	KIAA0536;PRP4;PRP4H;PRP4K;PRPF4B;hCG_1820375	Serine/threonine-protein kinase PRP4 homolog	Q13523;B4DZQ5;D3DWH5;Q15456	1	156.451	1	161.756	7.06723e-20	161.76	1	156.451	4.71603e-15	156.45	1	141.931	7.1854e-10	141.93		3	S	MKVEQESSSDDNL	CK2	0.117	7.06723e-20	161.76	_VEQEpSpSpSDDNLEDFDVEEEDEEALIEQR_	VEQES(1)S(1)S(1)DDNLEDFDVEEEDEEALIEQR	VEQES(156.45)S(156.45)S(156.45)DDNLEDFDVEEEDEEALIEQR	5	3	1180.1
343	183	519	519	Phosphoserine	1594	2014	5146	9119	TSenrich-100ughela-2	25395	5145	9116	TSenrich-100ughela-1	23781	IPI00013721	IPI00013721	IPI00013721	PRP4 kinase;PRP4 pre-mRNA-processing factor 4 homolog;Serine/threonine-protein kinase PRP4 homolog;cDNA FLJ51417, highly similar to Serine/threonine-protein kinase PRP4 homolog (EC 2.7.11.1);HCG1820375, isoform CRA_a;Protein-serine/threonine kinase	KIAA0536;PRP4;PRP4H;PRP4K;PRPF4B;hCG_1820375	Serine/threonine-protein kinase PRP4 homolog	Q13523;B4DZQ5;D3DWH5;Q15456	1	156.451	1	161.756	7.06723e-20	161.76	1	156.451	4.71603e-15	156.45	1	141.931	7.1854e-10	141.93		3	S	KVEQESSSDDNLE	CK2	0.117	7.06723e-20	161.76	_VEQEpSpSpSDDNLEDFDVEEEDEEALIEQR_	VEQES(1)S(1)S(1)DDNLEDFDVEEEDEEALIEQR	VEQES(156.45)S(156.45)S(156.45)DDNLEDFDVEEEDEEALIEQR	6	3	1180.1
344	183	520	520	Phosphoserine	1594	2014	5146	9119	TSenrich-100ughela-2	25395	5145	9116	TSenrich-100ughela-1	23781	IPI00013721	IPI00013721	IPI00013721	PRP4 kinase;PRP4 pre-mRNA-processing factor 4 homolog;Serine/threonine-protein kinase PRP4 homolog;cDNA FLJ51417, highly similar to Serine/threonine-protein kinase PRP4 homolog (EC 2.7.11.1);HCG1820375, isoform CRA_a;Protein-serine/threonine kinase	KIAA0536;PRP4;PRP4H;PRP4K;PRPF4B;hCG_1820375	Serine/threonine-protein kinase PRP4 homolog	Q13523;B4DZQ5;D3DWH5;Q15456	1	156.451	1	161.756	7.06723e-20	161.76	1	156.451	4.71603e-15	156.45	1	141.931	7.1854e-10	141.93		3	S	VEQESSSDDNLED			7.06723e-20	161.76	_VEQEpSpSpSDDNLEDFDVEEEDEEALIEQR_	VEQES(1)S(1)S(1)DDNLEDFDVEEEDEEALIEQR	VEQES(156.45)S(156.45)S(156.45)DDNLEDFDVEEEDEEALIEQR	7	3	1180.1
345	183	142	142	Phosphoserine	1654	2084	5311	9398	TSenrich-100ughela-2	28799	5308	9389	TSenrich-100ughela-1	21332	IPI00013721	IPI00013721	IPI00013721	PRP4 kinase;PRP4 pre-mRNA-processing factor 4 homolog;Serine/threonine-protein kinase PRP4 homolog;cDNA FLJ51417, highly similar to Serine/threonine-protein kinase PRP4 homolog (EC 2.7.11.1);HCG1820375, isoform CRA_a;Protein-serine/threonine kinase	KIAA0536;PRP4;PRP4H;PRP4K;PRPF4B;hCG_1820375	Serine/threonine-protein kinase PRP4 homolog	Q13523;B4DZQ5;D3DWH5;Q15456	0.750257	4.76273	0.961314	14.2765	0.00105698	111.19	0.750257	4.76273	0.192417	82.851	0.92372	10.6136	0.207276	82.047		2	S	ILQGYESGSEEEG	CK2	0.117	0.00105698	111.19	_VQSGMGLILQGYEpSGpSEEEGEIHEK_	VQS(0.046)GMGLILQGY(0.306)ES(0.75)GS(0.897)EEEGEIHEK	VQS(-15.71)GMGLILQGY(-4.76)ES(4.76)GS(9.47)EEEGEIHEK	14	3	956.068
346	183	144	144	Phosphoserine	1654	2084	5311	9398	TSenrich-100ughela-2	28799	5308	9389	TSenrich-100ughela-1	21332	IPI00013721	IPI00013721	IPI00013721	PRP4 kinase;PRP4 pre-mRNA-processing factor 4 homolog;Serine/threonine-protein kinase PRP4 homolog;cDNA FLJ51417, highly similar to Serine/threonine-protein kinase PRP4 homolog (EC 2.7.11.1);HCG1820375, isoform CRA_a;Protein-serine/threonine kinase	KIAA0536;PRP4;PRP4H;PRP4K;PRPF4B;hCG_1820375	Serine/threonine-protein kinase PRP4 homolog	Q13523;B4DZQ5;D3DWH5;Q15456	0.896893	9.47399	0.848056	7.69451	0.00105698	111.19	0.896893	9.47399	0.192417	82.851	0.92372	10.6136	0.207276	82.047		2	S	QGYESGSEEEGEI	CK2	0.117	0.00105698	111.19	_VQSGMGLILQGYEpSGpSEEEGEIHEK_	VQS(0.046)GMGLILQGY(0.306)ES(0.75)GS(0.897)EEEGEIHEK	VQS(-15.71)GMGLILQGY(-4.76)ES(4.76)GS(9.47)EEEGEIHEK	16	3	956.068
347	184	421	421	Phosphoserine; by CK2	599;600	765;766	1915	3334	TSenrich-100ughela-2	13346	1909	3320	TSenrich-100ughela-3	12309	IPI00013774	IPI00013774	IPI00013774	Histone deacetylase 1;cDNA FLJ51764, highly similar to Histone deacetylase 1;Putative uncharacterized protein DKFZp686H12203;HDAC1 protein;Histone deacetylase 1, isoform CRA_a	HDAC1;RPD3L1;DKFZp686H12203;hCG_41610;RP4-811H24.2-001	Histone deacetylase 1	Q13547;B4DRG0;B5BU61;Q5HYD4;Q6IT96	1	103.473	1	38.0556	0.0456815	84.19	1	103.473	0.00326367	103.47	1	61.3448	7.32293e-16	161.08		2	S	ACEEEFSDSEEEG	CK2	0.117	7.32293e-16	161.08	_IACEEEFpSDpSEEEGEGGRK_	IACEEEFS(1)DS(1)EEEGEGGRK	IACEEEFS(103.47)DS(103.47)EEEGEGGRK	8	3	773.278
348	184	423	423	Phosphoserine; by CK2	599;600	765;766	1915	3334	TSenrich-100ughela-2	13346	1909	3320	TSenrich-100ughela-3	12309	IPI00013774	IPI00013774	IPI00013774	Histone deacetylase 1;cDNA FLJ51764, highly similar to Histone deacetylase 1;Putative uncharacterized protein DKFZp686H12203;HDAC1 protein;Histone deacetylase 1, isoform CRA_a	HDAC1;RPD3L1;DKFZp686H12203;hCG_41610;RP4-811H24.2-001	Histone deacetylase 1	Q13547;B4DRG0;B5BU61;Q5HYD4;Q6IT96	1	103.473	1	38.0556	0.0456815	84.19	1	103.473	0.00326367	103.47	1	61.3448	7.32293e-16	161.08		2	S	EEEFSDSEEEGEG	CK2	0.117	7.32293e-16	161.08	_IACEEEFpSDpSEEEGEGGRK_	IACEEEFS(1)DS(1)EEEGEGGRK	IACEEEFS(103.47)DS(103.47)EEEGEGGRK	10	3	773.278
349	185	597	597	Phosphoserine	322	424	1053	1817	TSenrich-100ughela-2	20072	1052	1816	TSenrich-100ughela-1	18379	IPI00013788;IPI00644220	IPI00013788	IPI00013788	HIV Tat-specific factor 1;cDNA FLJ60139, highly similar to Homo sapiens HIV TAT specific factor 1 (HTATSF1), mRNA;HIV-1 Tat specific factor 1	HTATSF1;HTATSF1;RP1-196E23.2-002	HIV Tat-specific factor 1;cDNA FLJ60139, highly similar to Homo sapiens HIV TAT specific factor 1 (HTATSF1), mRNA	O43719;B4DRS4;Q5H918	1	97.8291	1	125.865	7.961e-06	125.86	1	97.8291	0.0497165	97.829	1	73.6713	0.530689	73.671		3	S	ELEENDSENSEFE			7.961e-06	125.86	_ELHENVLDKELEENDpSENpSEFEDDGpSEK_	ELHENVLDKELEENDS(1)ENS(1)EFEDDGS(1)EK	ELHENVLDKELEENDS(97.83)ENS(97.83)EFEDDGS(97.83)EK	16	3	1173.77
350	185	600	600	Phosphoserine	322	424	1053	1817	TSenrich-100ughela-2	20072	1052	1816	TSenrich-100ughela-1	18379	IPI00013788;IPI00644220	IPI00013788	IPI00013788	HIV Tat-specific factor 1;cDNA FLJ60139, highly similar to Homo sapiens HIV TAT specific factor 1 (HTATSF1), mRNA;HIV-1 Tat specific factor 1	HTATSF1;HTATSF1;RP1-196E23.2-002	HIV Tat-specific factor 1;cDNA FLJ60139, highly similar to Homo sapiens HIV TAT specific factor 1 (HTATSF1), mRNA	O43719;B4DRS4;Q5H918	1	97.8291	1	125.865	7.961e-06	125.86	1	97.8291	0.0497165	97.829	1	73.6713	0.530689	73.671		3	S	ENDSENSEFEDDG	CK1;CK2	0.081	7.961e-06	125.86	_ELHENVLDKELEENDpSENpSEFEDDGpSEK_	ELHENVLDKELEENDS(1)ENS(1)EFEDDGS(1)EK	ELHENVLDKELEENDS(97.83)ENS(97.83)EFEDDGS(97.83)EK	19	3	1173.77
351	185	607	607	Phosphoserine	322	424	1053	1817	TSenrich-100ughela-2	20072	1052	1816	TSenrich-100ughela-1	18379	IPI00013788;IPI00644220	IPI00013788	IPI00013788	HIV Tat-specific factor 1;cDNA FLJ60139, highly similar to Homo sapiens HIV TAT specific factor 1 (HTATSF1), mRNA;HIV-1 Tat specific factor 1	HTATSF1;HTATSF1;RP1-196E23.2-002	HIV Tat-specific factor 1;cDNA FLJ60139, highly similar to Homo sapiens HIV TAT specific factor 1 (HTATSF1), mRNA	O43719;B4DRS4;Q5H918	1	97.8291	1	125.865	7.961e-06	125.86	1	97.8291	0.0497165	97.829	1	73.6713	0.530689	73.671		3	S	EFEDDGSEKVLDE			7.961e-06	125.86	_ELHENVLDKELEENDpSENpSEFEDDGpSEK_	ELHENVLDKELEENDS(1)ENS(1)EFEDDGS(1)EK	ELHENVLDKELEENDS(97.83)ENS(97.83)EFEDDGS(97.83)EK	26	3	1173.77
352	185	452	452	Phosphoserine	1451	1830	4710	8368	TSenrich-100ughela-2	12868	4709	8367	TSenrich-100ughela-3	14627	IPI00013788;IPI00644220	IPI00013788	IPI00013788	HIV Tat-specific factor 1;cDNA FLJ60139, highly similar to Homo sapiens HIV TAT specific factor 1 (HTATSF1), mRNA;HIV-1 Tat specific factor 1	HTATSF1;HTATSF1;RP1-196E23.2-002	HIV Tat-specific factor 1;cDNA FLJ60139, highly similar to Homo sapiens HIV TAT specific factor 1 (HTATSF1), mRNA	O43719;B4DRS4;Q5H918	0.975903	16.0132					0.975903	16.0132	0.693438	64.938	0.995492	23.4368	0.0281888	107.25		2	S	ENNAKESSPEKEA	CK2	0.117	0.0281888	107.25	_TEDGGEFEEGASENNAKEpSpSPEKEAEEGCPEK_	T(0.001)EDGGEFEEGAS(0.05)ENNAKES(0.976)S(0.973)PEKEAEEGCPEK	T(-36.35)EDGGEFEEGAS(-15.59)ENNAKES(16.01)S(15.59)PEKEAEEGCPEK	19	3	1210.79
353	185	453	453	Phosphoserine	1451	1830	4710	8368	TSenrich-100ughela-2	12868	4709	8367	TSenrich-100ughela-3	14627	IPI00013788;IPI00644220	IPI00013788	IPI00013788	HIV Tat-specific factor 1;cDNA FLJ60139, highly similar to Homo sapiens HIV TAT specific factor 1 (HTATSF1), mRNA;HIV-1 Tat specific factor 1	HTATSF1;HTATSF1;RP1-196E23.2-002	HIV Tat-specific factor 1;cDNA FLJ60139, highly similar to Homo sapiens HIV TAT specific factor 1 (HTATSF1), mRNA	O43719;B4DRS4;Q5H918	0.973452	15.5892					0.973452	15.5892	0.693438	64.938	0.998953	29.778	0.0281888	107.25		2	S	NNAKESSPEKEAE	CDK1;CDK2;Polo box;Proline-directed	0.00405	0.0281888	107.25	_TEDGGEFEEGASENNAKEpSpSPEKEAEEGCPEK_	T(0.001)EDGGEFEEGAS(0.05)ENNAKES(0.976)S(0.973)PEKEAEEGCPEK	T(-36.35)EDGGEFEEGAS(-15.59)ENNAKES(16.01)S(15.59)PEKEAEEGCPEK	20	3	1210.79
354	185	616	616	Phosphoserine	1617	2040	5202	9224	TSenrich-100ughela-2	16414	5200	9220	TSenrich-100ughela-3	16865	IPI00013788;IPI00644220	IPI00013788	IPI00013788	HIV Tat-specific factor 1;cDNA FLJ60139, highly similar to Homo sapiens HIV TAT specific factor 1 (HTATSF1), mRNA;HIV-1 Tat specific factor 1	HTATSF1;HTATSF1;RP1-196E23.2-002	HIV Tat-specific factor 1;cDNA FLJ60139, highly similar to Homo sapiens HIV TAT specific factor 1 (HTATSF1), mRNA	O43719;B4DRS4;Q5H918	1	85.5115	1	80.6645	0.00273364	106.61	1	85.5115	0.00121637	113.44	1	100.461	1.14595e-09	135.2		2	S	VLDEEGSEREFDE	CK2	0.117	1.14595e-09	135.2	_VLDEEGpSEREFDEDpSDEKEEEEDTYEK_	VLDEEGS(1)EREFDEDS(1)DEKEEEEDTYEK	VLDEEGS(85.51)EREFDEDS(37.38)DEKEEEEDT(-37.38)Y(-43.61)EK	7	3	1147.43
355	185	624	624	Phosphoserine	1617	2040	5202	9224	TSenrich-100ughela-2	16414	5200	9220	TSenrich-100ughela-3	16865	IPI00013788;IPI00644220	IPI00013788	IPI00013788	HIV Tat-specific factor 1;cDNA FLJ60139, highly similar to Homo sapiens HIV TAT specific factor 1 (HTATSF1), mRNA;HIV-1 Tat specific factor 1	HTATSF1;HTATSF1;RP1-196E23.2-002	HIV Tat-specific factor 1;cDNA FLJ60139, highly similar to Homo sapiens HIV TAT specific factor 1 (HTATSF1), mRNA	O43719;B4DRS4;Q5H918	0.999774	37.3785	0.999918	42.2845	0.00273364	106.61	0.999774	37.3785	0.00121637	113.44	0.999999	64.0146	1.14595e-09	135.2		2	S	REFDEDSDEKEEE			1.14595e-09	135.2	_VLDEEGpSEREFDEDpSDEKEEEEDTYEK_	VLDEEGS(1)EREFDEDS(1)DEKEEEEDTYEK	VLDEEGS(85.51)EREFDEDS(37.38)DEKEEEEDT(-37.38)Y(-43.61)EK	15	3	1147.43
356	187	224	224	Phosphoserine	479	622	1563	2664	TSenrich-100ughela-1	10575	1561	2662	TSenrich-100ughela-3	13295	IPI00910816;IPI00013830	IPI00910816	IPI00910816	cDNA FLJ59238, highly similar to SNW domain-containing protein 1;Nuclear protein SkiP;Nuclear receptor coactivator NCoA-62;Ski-interacting protein;SNW domain-containing protein 1;cDNA FLJ51388, highly similar to SNW domain-containing protein 1;cDNA, FLJ78986, highly similar to SNW domain-containing protein 1;SNW1 protein	SKIIP;SKIP;SNW1	cDNA FLJ59238, highly similar to SNW domain-containing protein 1;SNW domain-containing protein 1	B4DEG7;Q13573;B4DY36;B7Z9X2;Q0D2M5;Q6I9S2;Q6P151	0.998887	27.1974	0.998887	27.1974	0.643338	34.328					1	79.7953	0.00105548	125.87		2	S	IPRGPPSPPAPVM	ERK/MAPK;Proline-directed;WW GroupIV	0.0023175	0.00105548	125.87	_GPPpSPPAPVMHpSPSR_	GPPS(0.999)PPAPVMHS(0.585)PS(0.416)R	GPPS(27.2)PPAPVMHS(1.48)PS(-1.48)R	4	3	558.568
357	187	232	232	Phosphoserine	479	622	1563	2664	TSenrich-100ughela-1	10575	1561	2662	TSenrich-100ughela-3	13295	IPI00910816;IPI00013830	IPI00910816	IPI00910816	cDNA FLJ59238, highly similar to SNW domain-containing protein 1;Nuclear protein SkiP;Nuclear receptor coactivator NCoA-62;Ski-interacting protein;SNW domain-containing protein 1;cDNA FLJ51388, highly similar to SNW domain-containing protein 1;cDNA, FLJ78986, highly similar to SNW domain-containing protein 1;SNW1 protein	SKIIP;SKIP;SNW1	cDNA FLJ59238, highly similar to SNW domain-containing protein 1;SNW domain-containing protein 1	B4DEG7;Q13573;B4DY36;B7Z9X2;Q0D2M5;Q6I9S2;Q6P151	0.584676	1.47701	0.584676	1.47701	0.643338	34.328					0.990733	20.2902	0.00105548	125.87		2	S	PAPVMHSPSRKMT	CDK1;CDK2;Proline-directed	0.0057	0.00105548	125.87	_GPPpSPPAPVMHpSPSR_	GPPS(0.999)PPAPVMHS(0.585)PS(0.416)R	GPPS(27.2)PPAPVMHS(1.48)PS(-1.48)R	12	3	558.568
358	188	104	104	Phosphoserine	589	754	1882	3274	TSenrich-100ughela-2	9975	1881	3272	TSenrich-100ughela-3	14828	IPI00479191;IPI00013881;IPI00026230;IPI00908896;IPI00964535;IPI00966018;IPI00963924;IPI00968132;IPI00967216;IPI00966932;IPI00965435;IPI00964846;IPI00974526;IPI00967835	IPI00479191	IPI00479191	Heterogeneous nuclear ribonucleoprotein H;Heterogeneous nuclear ribonucleoprotein H, N-terminally processed;FTP-3;Heterogeneous nuclear ribonucleoprotein H';Heterogeneous nuclear ribonucleoprotein H2;cDNA FLJ54533, highly similar to Heterogeneous nuclear ribonucleoprotein H;Putative uncharacterized protein DKFZp686A15170	HNRNPH1;HNRPH;HNRPH1;FTP3;HNRNPH2;HNRPH2;DKFZp686A15170	51 kDa protein;Heterogeneous nuclear ribonucleoprotein H;Heterogeneous nuclear ribonucleoprotein H2;cDNA FLJ54533, highly similar to Heterogeneous nuclear ribonucleoprotein H;Uncharacterized protein;Uncharacterized protein;Uncharacterized protein;Uncharact	P31943;P55795;B4DP51;Q68DG4;D6RBM0;E5RGH4;D6RIH9;D6RJ04;D6RDU3;D6RIU0;D6RIT2;D6RFM3;D6R9T0;E5RGV0;D6RAM1	0.499248	0					0.499248	0	0.302278	62.43	0.12256	-8.5487	9.29115e-77	240.1		1	S	KHTGPNSPDTAND	CK1;ERK/MAPK;Proline-directed;WW GroupIV	0.0023175	9.29115e-77	240.1	_HpTGPNSPDTANDGFVR_	HT(0.499)GPNS(0.499)PDT(0.002)ANDGFVR	HT(0)GPNS(0)PDT(-25.21)ANDGFVR	6	3	588.916
359	189	21	21	Phosphoserine	1058	1318	3393	6231	TSenrich-100ughela-1	12325	3393	6231	TSenrich-100ughela-1	12325	IPI00014085;IPI00791955;IPI00219502;IPI00794475;IPI00974365	IPI00014085	IPI00014085	G1/S-specific cyclin-E2;CCNE2 protein;Cyclin E2, isoform CRA_a;G1/S-specific cyclin-E2	CCNE2;CCNE2;hCG_15054;CCNE2	Isoform Long of G1/S-specific cyclin-E2;Cyclin E2, isoform CRA_a;Isoform Short of G1/S-specific cyclin-E2;Uncharacterized protein;Uncharacterized protein	O96020-1;O96020;Q8WUE3;O96020-2;E5RK20;E5RHN2	0.677294	5.53919	0.677294	5.53919	0.0637698	82.693										1	S	QPSQTESPQEAQI	CK1;CK2;Proline-directed	0.05	0.0637698	82.693	_QQPQPSQTEpSPQEAQIIQAK_	QQPQPS(0.189)QT(0.134)ES(0.677)PQEAQIIQAK	QQPQPS(-5.54)QT(-7.05)ES(5.54)PQEAQIIQAK	10	3	772.7
360	190	253	253		664	837	2090	3657	TSenrich-100ughela-2	22780	2086	3644	TSenrich-100ughela-3	27757	IPI00871851;IPI00014177;IPI00894340;IPI00893658	IPI00871851	IPI00871851	Neural precursor cell expressed developmentally down-regulated protein 5;Septin-2;Neural precursor cell expressed developmentally down-regulated protein 5;Septin-2;Putative uncharacterized protein SEPT2	DIFF6;KIAA0158;NEDD5;SEPT2;DIFF6;KIAA0158;NEDD5;SEPT2;SEPT2	Isoform 2 of Septin-2;Isoform 1 of Septin-2;Uncharacterized protein;22 kDa protein	Q15019-2;Q15019;Q15019-1;B5MCX3	1	72.5253	0.992592	21.3117	4.73045e-24	185.42	1	72.5253	1.80308e-24	187.68	0.560356	1.05838	2.07269e-57	229.97		1	S	HLPDAESDEDEDF	CK2	0.117	2.07269e-57	229.97	_IYHLPDAEpSDEDEDFKEQTR_	IYHLPDAES(1)DEDEDFKEQTR	IY(-72.53)HLPDAES(72.53)DEDEDFKEQT(-114.31)R	9	3	839.687
361	191	1589	1589		93	124	303	499	TSenrich-100ughela-3	14698	303	499	TSenrich-100ughela-3	14698	IPI00014186;IPI00219003	IPI00014186	IPI00014186	Alpha-fetoprotein enhancer-binding protein;AT motif-binding factor;AT-binding transcription factor 1;Zinc finger homeobox protein 3;Zinc finger homeodomain protein 3;ATBT;Alpha-fetoprotein enhancer-binding protein;AT motif-binding factor;AT-binding transcription factor 1;Zinc finger homeobox protein 3;Zinc finger homeodomain protein 3;ZFHX3 protein	ATBF1;ZFHX3;ATBF1;ZFHX3	Isoform A of Zinc finger homeobox protein 3;Isoform B of Zinc finger homeobox protein 3	Q15911-1;Q15911;Q6TCJ2;Q15911-2;Q8N2Y6	0.342457	0									0.342457	0	0.0162113	91.145		1	S	GQPEPTSSPDNKP	CK2	0.117	0.0162113	91.145	_ALQESATGQPEPpTSSPDNKPFK_	ALQESATGQPEPT(0.342)S(0.342)S(0.315)PDNKPFK	ALQES(-63.99)AT(-37.69)GQPEPT(0)S(0)S(-0.36)PDNKPFK	14	3	803.704
362	192	537	537		780	990	2605	4804	TSenrich-100ughela-2	14853	2604	4803	TSenrich-100ughela-1	13721	IPI00927682;IPI00014235	IPI00927682	IPI00927682	Putative uncharacterized protein RAB3GAP1;RAB3 GTPase-activating protein 130 kDa subunit;Rab3 GTPase-activating protein catalytic subunit;Rab3-GAP p130;RAB3GAP1 protein;RAB3 GTPase activating protein subunit 1;RAB3 GTPase activating protein subunit 1 (Catalytic), isoform CRA_d;RAB3 GTPase activating protein subunit 1 (Catalytic), isoform CRA_a	RAB3GAP1;KIAA0066;RAB3GAP;RAB3GAP1;hCG_25660	rab3 GTPase-activating protein catalytic subunit isoform 1;Isoform 1 of Rab3 GTPase-activating protein catalytic subunit	C9J837;Q15042-1;Q15042;A6H8Z3;B9A6J2;D3DP75	0.497036	0	0.954403	15.8248	9.4247e-19	117.68	0.497036	0	0.0436561	87.515						1	S	DEGKKTSASDVTN	CK2	0.117	9.4247e-19	117.68	_KpTSASDVTNIYPGDAGK_	KT(0.497)S(0.497)AS(0.006)DVTNIYPGDAGK	KT(0)S(0)AS(-19.29)DVT(-38.12)NIY(-61.4)PGDAGK	3	2	902.412
363	193	484	484		1540	1941	4962	8789	TSenrich-100ughela-1	22325	4962	8789	TSenrich-100ughela-1	22325	IPI00015793;IPI00014252	IPI00015793	IPI00015793	EST1-like protein A;Ever shorter telomeres 1A;hSmg5/7a;Smg-6 homolog;Telomerase subunit EST1A;Telomerase-binding protein EST1A;EST1-like protein A;Ever shorter telomeres 1A;hSmg5/7a;Smg-6 homolog;Telomerase subunit EST1A;Telomerase-binding protein EST1A;cDNA FLJ53500, highly similar to Telomerase-binding protein EST1A;HCG1813980, isoform CRA_d;cDNA FLJ14069 fis, clone HEMBB1001562, weakly similar…	C17orf31;EST1A;KIAA0732;SMG6;C17orf31;EST1A;KIAA0732;SMG6;hCG_1813980	Isoform 1 of Telomerase-binding protein EST1A;telomerase-binding protein EST1A isoform 2	Q86US8-1;Q86US8;Q86US8-2;B7Z874;Q9H7Y8	0.95341	13.7212	0.95341	13.7212	3.26001e-06	124.29										2	S	DTDDEVSPTSWGD	Proline-directed	0.05	3.26001e-06	124.29	_TQTPQLHFLDpTDDEVpSPTSWGDSR_	TQT(0.001)PQLHFLDT(0.999)DDEVS(0.953)PT(0.041)S(0.006)WGDSR	T(-39.77)QT(-31.8)PQLHFLDT(31.8)DDEVS(13.72)PT(-13.72)S(-22.11)WGDS(-38.67)R	16	3	964.73
364	194	50	50	Phosphoserine	317	417;418	1039	1800	TSenrich-100ughela-3	13221	1038	1798	TSenrich-100ughela-3	11749	IPI00014298;IPI00385054	IPI00014298	IPI00014298	Keratinocyte protein IEF SSP 9502;Periodic tryptophan protein 1 homolog;cDNA FLJ51513, highly similar to Periodic tryptophan protein 1 homolog;PWP1 protein;Nuclear phosphoprotein similar to S. cerevisiae PWP1 variant;PWP1 homolog (S. cerevisiae);PWP1 protein	PWP1;PWP1	Periodic tryptophan protein 1 homolog;PWP1 protein	Q13610;B4DJV5;Q05BL3;Q53FW9;Q6PIN4;Q6PKI5;Q86X79;Q9BV37;Q7Z3X9	0.99993	41.5949									0.99993	41.5949	9.36182e-16	160.34		1	S	QEEGGGSDEEETG	CK2	0.117	9.36182e-16	160.34	_EKLQEEGGGpSDEEETGSPSEDGMQSAR_	EKLQEEGGGS(1)DEEETGSPSEDGMQSAR	EKLQEEGGGS(41.59)DEEET(-41.59)GS(-63.35)PS(-90.57)EDGMQS(-129.19)AR	10	3	973.721
365	195	630	630		141	188	457	706	TSenrich-100ughela-3	18343	457	706	TSenrich-100ughela-3	18343	IPI00014307;IPI00398737	IPI00014307	IPI00014307	Myotubularin-related protein 2;cDNA FLJ76292, highly similar to Homo sapiens myotubularin related protein 2 (MTMR2), transcript variant 1, mRNA;cDNA FLJ54325, highly similar to Myotubularin-related protein 2 (EC 3.1.3.-);cDNA FLJ54080, highly similar to Myotubularin-related protein 2 (EC 3.1.3.-);Myotubularin related protein 2, isoform CRA_a;Putative uncharacterized protein MTMR2	KIAA1073;MTMR2;hCG_21453;MTMR2	Myotubularin-related protein 2;myotubularin-related protein 2 isoform 2	Q13614;A8K5G2;B4DDL6;A6NN98	0.499826	0									0.499826	0	0.0357812	100.21		1	S	SSSERASSPAQCV	CK1;PKA	0.042	0.0357812	100.21	_ApSSPAQCVTPVQTVV_	AS(0.5)S(0.5)PAQCVTPVQTVV	AS(0)S(0)PAQCVT(-31.57)PVQT(-74.75)VV	2	2	812.376
366	195	631	631		141	188	457	706	TSenrich-100ughela-3	18343	457	706	TSenrich-100ughela-3	18343	IPI00014307;IPI00398737	IPI00014307	IPI00014307	Myotubularin-related protein 2;cDNA FLJ76292, highly similar to Homo sapiens myotubularin related protein 2 (MTMR2), transcript variant 1, mRNA;cDNA FLJ54325, highly similar to Myotubularin-related protein 2 (EC 3.1.3.-);cDNA FLJ54080, highly similar to Myotubularin-related protein 2 (EC 3.1.3.-);Myotubularin related protein 2, isoform CRA_a;Putative uncharacterized protein MTMR2	KIAA1073;MTMR2;hCG_21453;MTMR2	Myotubularin-related protein 2;myotubularin-related protein 2 isoform 2	Q13614;A8K5G2;B4DDL6;A6NN98	0.499826	0									0.499826	0	0.0357812	100.21		1	S	SSERASSPAQCVT	CAMK2;Polo box;Proline-directed	0.00405	0.0357812	100.21	_ApSSPAQCVTPVQTVV_	AS(0.5)S(0.5)PAQCVTPVQTVV	AS(0)S(0)PAQCVT(-31.57)PVQT(-74.75)VV	3	2	812.376
367	196	298	298	Phosphoserine	665	838	2092	3662	TSenrich-100ughela-1	18786	2091	3660	TSenrich-100ughela-3	20210	IPI00440502;IPI00894013;IPI00893622;IPI00797929;IPI00014414;IPI00893088;IPI00973934;IPI00894424;IPI00894298;IPI00893552	IPI00440502	IPI00440502	Bromodomain-containing protein 2;O27.1.1;Really interesting new gene 3 protein;Bromodomain containing 2;Bromodomain containing 2;Bromodomain containing 2;Bromodomain-containing protein 2;O27.1.1;Really interesting new gene 3 protein;Bromodomain containing 2;Putative uncharacterized protein DKFZp686N0336;Bromodomain containing 2, isoform CRA_a;Putative uncharacterized protein DKFZp313H139;Bromodom…	BRD2;KIAA9001;RING3;DAQB-22D21.2-005;DASS-219C23.1-005;XXbac-BCX136A3.4-005;XXbac-BPG181M17.2-005;BRD2;DAMA-214M2.2-005;BRD2;DAQB-22D21.2-006;DASS-219C23.1-006;XXbac-BCX136A3.4-006;XXbac-BPG181M17.2-006;DAMA-214M2.2-006;BRD2;KIAA9001;RING3;DAMC-226H3.7-006;DKFZp686N0336;DKFZp313H139;hCG_17503;BRD2;DAMC-226H3.7-005;BRD2;DAMC-226H3.7-001	Isoform 2 of Bromodomain-containing protein 2;Bromodomain containing 2;Bromodomain containing 2;Protein;Isoform 1 of Bromodomain-containing protein 2;88 kDa protein;83 kDa protein;Bromodomain containing 2;Protein;Bromodomain containing 2	P25440-2;P25440;A2AAU0;B0S7P1;A2AAU1;B0S7P2;P25440-1;B0V074;Q63HQ9;Q658Y7;B0V073;B0V072	0.999902	40.1887	0.999902	40.1887	1.57037e-05	119.06					0.953066	12.5468	1.30278e-05	121.39		2	S	AILAPGSPASPPG	ERK/MAPK;Proline-directed	0.0025	1.30278e-05	121.39	_KADTTTPTPTAILAPGpSPApSPPGSLEPK_	KADTTTPTPTAILAPGS(1)PAS(0.993)PPGS(0.008)LEPK	KADT(-66.6)T(-66.27)T(-61.67)PT(-61.67)PT(-60.96)AILAPGS(40.19)PAS(21.23)PPGS(-21.23)LEPK	17	3	954.791
368	196	301	301	Phosphoserine	665	838	2092	3662	TSenrich-100ughela-1	18786	2091	3660	TSenrich-100ughela-3	20210	IPI00440502;IPI00894013;IPI00893622;IPI00797929;IPI00014414;IPI00893088;IPI00973934;IPI00894424;IPI00894298;IPI00893552	IPI00440502	IPI00440502	Bromodomain-containing protein 2;O27.1.1;Really interesting new gene 3 protein;Bromodomain containing 2;Bromodomain containing 2;Bromodomain containing 2;Bromodomain-containing protein 2;O27.1.1;Really interesting new gene 3 protein;Bromodomain containing 2;Putative uncharacterized protein DKFZp686N0336;Bromodomain containing 2, isoform CRA_a;Putative uncharacterized protein DKFZp313H139;Bromodom…	BRD2;KIAA9001;RING3;DAQB-22D21.2-005;DASS-219C23.1-005;XXbac-BCX136A3.4-005;XXbac-BPG181M17.2-005;BRD2;DAMA-214M2.2-005;BRD2;DAQB-22D21.2-006;DASS-219C23.1-006;XXbac-BCX136A3.4-006;XXbac-BPG181M17.2-006;DAMA-214M2.2-006;BRD2;KIAA9001;RING3;DAMC-226H3.7-006;DKFZp686N0336;DKFZp313H139;hCG_17503;BRD2;DAMC-226H3.7-005;BRD2;DAMC-226H3.7-001	Isoform 2 of Bromodomain-containing protein 2;Bromodomain containing 2;Bromodomain containing 2;Protein;Isoform 1 of Bromodomain-containing protein 2;88 kDa protein;83 kDa protein;Bromodomain containing 2;Protein;Bromodomain containing 2	P25440-2;P25440;A2AAU0;B0S7P1;A2AAU1;B0S7P2;P25440-1;B0V074;Q63HQ9;Q658Y7;B0V073;B0V072	0.992531	21.2342	0.992531	21.2342	1.57037e-05	119.06					0.156332	-8.87163	1.30278e-05	121.39		2	S	APGSPASPPGSLE	CK1;ERK/MAPK;GSK3;Proline-directed;WW GroupIV	0.0023175	1.30278e-05	121.39	_KADTTTPTPTAILAPGpSPApSPPGSLEPK_	KADTTTPTPTAILAPGS(1)PAS(0.993)PPGS(0.008)LEPK	KADT(-66.6)T(-66.27)T(-61.67)PT(-61.67)PT(-60.96)AILAPGS(40.19)PAS(21.23)PPGS(-21.23)LEPK	20	3	954.791
369	197	323	323	Phosphoserine	1583	1997	5098	9036	TSenrich-100ughela-3	17232	5098	9036	TSenrich-100ughela-3	17232	IPI00014474	IPI00014474	IPI00014474	A-kinase anchor protein 8;A-kinase anchor protein 95 kDa;cDNA FLJ50339, highly similar to A-kinase anchor protein 8;AKAP8 protein;Putative uncharacterized protein DKFZp586B1222	AKAP8;AKAP95;DKFZp586B1222	A-kinase anchor protein 8	O43823;B7Z8L8;Q8NE02;Q9UG73	1	223.568									1	223.568	6.89345e-58	223.57		2	S	KLARVDSEGDFSE	CAMK2;CHK1;CHK1/2;CK2;PKD	0.003192	6.89345e-58	223.57	_VDpSEGDFpSENDDAAGDFR_	VDS(1)EGDFS(1)ENDDAAGDFR	VDS(223.57)EGDFS(223.57)ENDDAAGDFR	3	2	1053.35
370	197	328	328	Phosphoserine	1583	1997	5098	9036	TSenrich-100ughela-3	17232	5098	9036	TSenrich-100ughela-3	17232	IPI00014474	IPI00014474	IPI00014474	A-kinase anchor protein 8;A-kinase anchor protein 95 kDa;cDNA FLJ50339, highly similar to A-kinase anchor protein 8;AKAP8 protein;Putative uncharacterized protein DKFZp586B1222	AKAP8;AKAP95;DKFZp586B1222	A-kinase anchor protein 8	O43823;B7Z8L8;Q8NE02;Q9UG73	1	223.568									1	223.568	6.89345e-58	223.57		2	S	DSEGDFSENDDAA	CK2	0.117	6.89345e-58	223.57	_VDpSEGDFpSENDDAAGDFR_	VDS(1)EGDFS(1)ENDDAAGDFR	VDS(223.57)EGDFS(223.57)ENDDAAGDFR	8	2	1053.35
371	199	143	143	Phosphoserine	615	783	1949	3380	TSenrich-100ughela-2	22760	1949	3380	TSenrich-100ughela-2	22760	IPI00014865;IPI00942711	IPI00014865	IPI00014865	cDNA FLJ61655, highly similar to Phosphorylated CTD-interacting factor 1;Phosphorylated CTD-interacting factor 1	C20orf67;PCIF1	cDNA FLJ61655, highly similar to Phosphorylated CTD-interacting factor 1;Phosphorylated CTD-interacting factor 1	B7Z5U5;Q9H4Z3	0.486296	0	0.151891	-6.54777	0.178199	83.596	0.486296	0	0.00131385	109.28						2	S	TGQSVPSSPSIPG	CK1	0.081	0.00131385	109.28	_IEIPVTPpTGQSVPpSSPSIPGTPTLK_	IEIPVT(0.002)PT(0.827)GQS(0.176)VPS(0.486)S(0.486)PS(0.022)IPGTPTLK	IEIPVT(-26.09)PT(6.83)GQS(-6.83)VPS(0)S(0)PS(-13.44)IPGT(-38.51)PT(-38.51)LK	14	3	888.438
372	199	144	144	Phosphoserine	615	783	1949	3380	TSenrich-100ughela-2	22760	1949	3380	TSenrich-100ughela-2	22760	IPI00014865;IPI00942711	IPI00014865	IPI00014865	cDNA FLJ61655, highly similar to Phosphorylated CTD-interacting factor 1;Phosphorylated CTD-interacting factor 1	C20orf67;PCIF1	cDNA FLJ61655, highly similar to Phosphorylated CTD-interacting factor 1;Phosphorylated CTD-interacting factor 1	B7Z5U5;Q9H4Z3	0.486175	0	0.139711	-6.92156	0.178199	83.596	0.486175	0	0.00131385	109.28						2	S	GQSVPSSPSIPGT	CK1;ERK/MAPK;Polo box;Proline-directed;WW GroupIV	0.0023175	0.00131385	109.28	_IEIPVTPpTGQSVPpSSPSIPGTPTLK_	IEIPVT(0.002)PT(0.827)GQS(0.176)VPS(0.486)S(0.486)PS(0.022)IPGTPTLK	IEIPVT(-26.09)PT(6.83)GQS(-6.83)VPS(0)S(0)PS(-13.44)IPGT(-38.51)PT(-38.51)LK	15	3	888.438
373	200	4613	4613	Phosphoserine	542	700	1753	2959	TSenrich-100ughela-3	15624	1752	2957	TSenrich-100ughela-3	15047	IPI00014898;IPI00186711;IPI00398002;IPI00398778;IPI00398777;IPI00398779;IPI00398775;IPI00420096;IPI00398776	IPI00014898	IPI00014898	Hemidesmosomal protein 1;Plectin-1;Hemidesmosomal protein 1;Plectin-1;Hemidesmosomal protein 1;Plectin-1;Hemidesmosomal protein 1;Plectin-1;Hemidesmosomal protein 1;Plectin-1;HCG1994702;Plectin isoform 1b;Hemidesmosomal protein 1;Plectin-1;Hemidesmosomal protein 1;Plectin-1;Hemidesmosomal protein 1;Plectin-1;Hemidesmosomal protein 1;Plectin-1;Plectin 1, intermediate filament binding protein 500kD…	PLEC1;PLEC1;PLEC1;PLEC1;PLEC1;hCG_1994702;PLEC1;PLEC1;PLEC1;PLEC1;hCG_1994701	Isoform 1 of Plectin;Isoform 2 of Plectin;Isoform 3 of Plectin;Isoform 6 of Plectin;Isoform 5 of Plectin;Isoform 4 of Plectin;Isoform 9 of Plectin;Isoform 8 of Plectin;Isoform 7 of Plectin	Q15149-1;Q15149;Q15149-2;Q15149-3;Q15149-6;Q15149-5;Q8WXV5;Q15149-4;Q15149-9;Q15149-8;Q15149-7;D3DWL0;Q96IE3	0.978939	17.7609									0.978939	17.7609	2.83122e-11	159.86		3	S	STKGYYSPYSVSG	Proline-directed	0.05	2.83122e-11	159.86	_GYYpSPYSVSGSGpSTAGpSR_	GY(0.01)Y(0.01)S(0.979)PYS(0.001)VS(0.002)GS(0.013)GS(0.562)T(0.431)AGS(0.992)R	GY(-17.76)Y(-17.76)S(17.76)PY(-40.55)S(-31.05)VS(-24.15)GS(-16.3)GS(1.06)T(-1.06)AGS(18.28)R	4	2	1011.85
374	200	4622	4622	Phosphoserine	542	700	1753	2959	TSenrich-100ughela-3	15624	1752	2957	TSenrich-100ughela-3	15047	IPI00014898;IPI00186711;IPI00398002;IPI00398778;IPI00398777;IPI00398779;IPI00398775;IPI00420096;IPI00398776	IPI00014898	IPI00014898	Hemidesmosomal protein 1;Plectin-1;Hemidesmosomal protein 1;Plectin-1;Hemidesmosomal protein 1;Plectin-1;Hemidesmosomal protein 1;Plectin-1;Hemidesmosomal protein 1;Plectin-1;HCG1994702;Plectin isoform 1b;Hemidesmosomal protein 1;Plectin-1;Hemidesmosomal protein 1;Plectin-1;Hemidesmosomal protein 1;Plectin-1;Hemidesmosomal protein 1;Plectin-1;Plectin 1, intermediate filament binding protein 500kD…	PLEC1;PLEC1;PLEC1;PLEC1;PLEC1;hCG_1994702;PLEC1;PLEC1;PLEC1;PLEC1;hCG_1994701	Isoform 1 of Plectin;Isoform 2 of Plectin;Isoform 3 of Plectin;Isoform 6 of Plectin;Isoform 5 of Plectin;Isoform 4 of Plectin;Isoform 9 of Plectin;Isoform 8 of Plectin;Isoform 7 of Plectin	Q15149-1;Q15149;Q15149-2;Q15149-3;Q15149-6;Q15149-5;Q8WXV5;Q15149-4;Q15149-9;Q15149-8;Q15149-7;D3DWL0;Q96IE3	0.562341	1.05674									0.562341	1.05674	2.83122e-11	159.86		3	S	SVSGSGSTAGSRT	CK1;GSK3	0.081	2.83122e-11	159.86	_GYYpSPYSVSGSGpSTAGpSR_	GY(0.01)Y(0.01)S(0.979)PYS(0.001)VS(0.002)GS(0.013)GS(0.562)T(0.431)AGS(0.992)R	GY(-17.76)Y(-17.76)S(17.76)PY(-40.55)S(-31.05)VS(-24.15)GS(-16.3)GS(1.06)T(-1.06)AGS(18.28)R	13	2	1011.85
375	200	4626	4626	Phosphoserine	542	700	1753	2959	TSenrich-100ughela-3	15624	1752	2957	TSenrich-100ughela-3	15047	IPI00014898;IPI00186711;IPI00398002;IPI00398778;IPI00398777;IPI00398779;IPI00398775;IPI00420096;IPI00398776	IPI00014898	IPI00014898	Hemidesmosomal protein 1;Plectin-1;Hemidesmosomal protein 1;Plectin-1;Hemidesmosomal protein 1;Plectin-1;Hemidesmosomal protein 1;Plectin-1;Hemidesmosomal protein 1;Plectin-1;HCG1994702;Plectin isoform 1b;Hemidesmosomal protein 1;Plectin-1;Hemidesmosomal protein 1;Plectin-1;Hemidesmosomal protein 1;Plectin-1;Hemidesmosomal protein 1;Plectin-1;Plectin 1, intermediate filament binding protein 500kD…	PLEC1;PLEC1;PLEC1;PLEC1;PLEC1;hCG_1994702;PLEC1;PLEC1;PLEC1;PLEC1;hCG_1994701	Isoform 1 of Plectin;Isoform 2 of Plectin;Isoform 3 of Plectin;Isoform 6 of Plectin;Isoform 5 of Plectin;Isoform 4 of Plectin;Isoform 9 of Plectin;Isoform 8 of Plectin;Isoform 7 of Plectin	Q15149-1;Q15149;Q15149-2;Q15149-3;Q15149-6;Q15149-5;Q8WXV5;Q15149-4;Q15149-9;Q15149-8;Q15149-7;D3DWL0;Q96IE3	0.991781	18.2764									0.991781	18.2764	2.83122e-11	159.86		3	S	SGSTAGSRTGSRT	CK1;GSK3	0.081	2.83122e-11	159.86	_GYYpSPYSVSGSGpSTAGpSR_	GY(0.01)Y(0.01)S(0.979)PYS(0.001)VS(0.002)GS(0.013)GS(0.562)T(0.431)AGS(0.992)R	GY(-17.76)Y(-17.76)S(17.76)PY(-40.55)S(-31.05)VS(-24.15)GS(-16.3)GS(1.06)T(-1.06)AGS(18.28)R	17	2	1011.85
376	200	125	125	Phosphoserine	1155;1520	1436;1916	4901	8706	TSenrich-100ughela-2	16194	3726	6843	TSenrich-100ughela-1	21048	IPI00014898	IPI00014898	IPI00014898	Hemidesmosomal protein 1;Plectin-1	PLEC1	Isoform 1 of Plectin	Q15149-1;Q15149	0.905465	9.8128	1	69.3914	4.25125e-07	145.93	0.905465	9.8128	5.65824e-06	133.35	0.999999	59.3799	0.118057	79.702		1	S	VQGPLGSPPKRGP	CDK1;CDK2;Proline-directed	0.0057	4.25125e-07	145.93	_TPHVQAVQGPLGpSPPK_	T(0.095)PHVQAVQGPLGS(0.905)PPK	T(-9.81)PHVQAVQGPLGS(9.81)PPK	13	2	846.927
377	200	4384	4384	Phosphoserine	1357;1382	1701;1702;1703;1704;1737;1738;1739;1740	4479	7970	TSenrich-100ughela-2	15157	4467	7955	TSenrich-100ughela-1	14075	IPI00014898;IPI00186711;IPI00398002;IPI00398778;IPI00398777;IPI00398779;IPI00398775;IPI00420096;IPI00398776	IPI00014898	IPI00014898	Hemidesmosomal protein 1;Plectin-1;Hemidesmosomal protein 1;Plectin-1;Hemidesmosomal protein 1;Plectin-1;Hemidesmosomal protein 1;Plectin-1;Hemidesmosomal protein 1;Plectin-1;HCG1994702;Plectin isoform 1b;Hemidesmosomal protein 1;Plectin-1;Hemidesmosomal protein 1;Plectin-1;Hemidesmosomal protein 1;Plectin-1;Hemidesmosomal protein 1;Plectin-1;Plectin 1, intermediate filament binding protein 500kD…	PLEC1;PLEC1;PLEC1;PLEC1;PLEC1;hCG_1994702;PLEC1;PLEC1;PLEC1;PLEC1;hCG_1994701	Isoform 1 of Plectin;Isoform 2 of Plectin;Isoform 3 of Plectin;Isoform 6 of Plectin;Isoform 5 of Plectin;Isoform 4 of Plectin;Isoform 9 of Plectin;Isoform 8 of Plectin;Isoform 7 of Plectin	Q15149-1;Q15149;Q15149-2;Q15149-3;Q15149-6;Q15149-5;Q8WXV5;Q15149-4;Q15149-9;Q15149-8;Q15149-7;D3DWL0;Q96IE3	0.220799	0	0.281353	0	3.54976e-34	202.19	0.220799	0	4.57353e-16	165.21	0.320496	0	1.03163e-33	200.53		1	S	GGFRSRSSSVGSS	CAMK2;PKA/AKT	0.00111111	3.54976e-34	202.19	_pSSSVGSSSSYPISPAVSR_	S(0.221)S(0.221)S(0.221)VGS(0.039)S(0.039)S(0.039)S(0.221)Y(0.001)PISPAVSR	S(0)S(0)S(0)VGS(-7.58)S(-7.58)S(-7.58)S(0)Y(-22.51)PIS(-57.5)PAVS(-56.88)R	1	3	612.279
378	200	4385	4385	Phosphoserine	1357;1382	1701;1702;1703;1704;1737;1738;1739;1740	4479	7970	TSenrich-100ughela-2	15157	4467	7955	TSenrich-100ughela-1	14075	IPI00014898;IPI00186711;IPI00398002;IPI00398778;IPI00398777;IPI00398779;IPI00398775;IPI00420096;IPI00398776	IPI00014898	IPI00014898	Hemidesmosomal protein 1;Plectin-1;Hemidesmosomal protein 1;Plectin-1;Hemidesmosomal protein 1;Plectin-1;Hemidesmosomal protein 1;Plectin-1;Hemidesmosomal protein 1;Plectin-1;HCG1994702;Plectin isoform 1b;Hemidesmosomal protein 1;Plectin-1;Hemidesmosomal protein 1;Plectin-1;Hemidesmosomal protein 1;Plectin-1;Hemidesmosomal protein 1;Plectin-1;Plectin 1, intermediate filament binding protein 500kD…	PLEC1;PLEC1;PLEC1;PLEC1;PLEC1;hCG_1994702;PLEC1;PLEC1;PLEC1;PLEC1;hCG_1994701	Isoform 1 of Plectin;Isoform 2 of Plectin;Isoform 3 of Plectin;Isoform 6 of Plectin;Isoform 5 of Plectin;Isoform 4 of Plectin;Isoform 9 of Plectin;Isoform 8 of Plectin;Isoform 7 of Plectin	Q15149-1;Q15149;Q15149-2;Q15149-3;Q15149-6;Q15149-5;Q8WXV5;Q15149-4;Q15149-9;Q15149-8;Q15149-7;D3DWL0;Q96IE3	0.220799	0	0.281353	0	3.54976e-34	202.19	0.220799	0	4.57353e-16	165.21	0.320496	0	1.03163e-33	200.53		1	S	GFRSRSSSVGSSS	CK1;GSK3;PKA	0.042	3.54976e-34	202.19	_pSSSVGSSSSYPISPAVSR_	S(0.221)S(0.221)S(0.221)VGS(0.039)S(0.039)S(0.039)S(0.221)Y(0.001)PISPAVSR	S(0)S(0)S(0)VGS(-7.58)S(-7.58)S(-7.58)S(0)Y(-22.51)PIS(-57.5)PAVS(-56.88)R	2	3	612.279
379	200	4386	4386	Phosphoserine	1357;1382	1701;1702;1703;1704;1737;1738;1739;1740	4479	7970	TSenrich-100ughela-2	15157	4467	7955	TSenrich-100ughela-1	14075	IPI00014898;IPI00186711;IPI00398002;IPI00398778;IPI00398777;IPI00398779;IPI00398775;IPI00420096;IPI00398776	IPI00014898	IPI00014898	Hemidesmosomal protein 1;Plectin-1;Hemidesmosomal protein 1;Plectin-1;Hemidesmosomal protein 1;Plectin-1;Hemidesmosomal protein 1;Plectin-1;Hemidesmosomal protein 1;Plectin-1;HCG1994702;Plectin isoform 1b;Hemidesmosomal protein 1;Plectin-1;Hemidesmosomal protein 1;Plectin-1;Hemidesmosomal protein 1;Plectin-1;Hemidesmosomal protein 1;Plectin-1;Plectin 1, intermediate filament binding protein 500kD…	PLEC1;PLEC1;PLEC1;PLEC1;PLEC1;hCG_1994702;PLEC1;PLEC1;PLEC1;PLEC1;hCG_1994701	Isoform 1 of Plectin;Isoform 2 of Plectin;Isoform 3 of Plectin;Isoform 6 of Plectin;Isoform 5 of Plectin;Isoform 4 of Plectin;Isoform 9 of Plectin;Isoform 8 of Plectin;Isoform 7 of Plectin	Q15149-1;Q15149;Q15149-2;Q15149-3;Q15149-6;Q15149-5;Q8WXV5;Q15149-4;Q15149-9;Q15149-8;Q15149-7;D3DWL0;Q96IE3	0.220799	0	0.281353	0	3.54976e-34	202.19	0.220799	0	4.57353e-16	165.21	0.320496	0	1.03163e-33	200.53		1	S	FRSRSSSVGSSSS	CAMK2;CK1;GSK3;PKA/AKT	0.001764	3.54976e-34	202.19	_pSSSVGSSSSYPISPAVSR_	S(0.221)S(0.221)S(0.221)VGS(0.039)S(0.039)S(0.039)S(0.221)Y(0.001)PISPAVSR	S(0)S(0)S(0)VGS(-7.58)S(-7.58)S(-7.58)S(0)Y(-22.51)PIS(-57.5)PAVS(-56.88)R	3	3	612.279
380	200	4392	4392	Phosphoserine	1357;1382	1701;1702;1703;1704;1737;1738;1739;1740	4479	7970	TSenrich-100ughela-2	15157	4467	7955	TSenrich-100ughela-1	14075	IPI00014898;IPI00186711;IPI00398002;IPI00398778;IPI00398777;IPI00398779;IPI00398775;IPI00420096;IPI00398776	IPI00014898	IPI00014898	Hemidesmosomal protein 1;Plectin-1;Hemidesmosomal protein 1;Plectin-1;Hemidesmosomal protein 1;Plectin-1;Hemidesmosomal protein 1;Plectin-1;Hemidesmosomal protein 1;Plectin-1;HCG1994702;Plectin isoform 1b;Hemidesmosomal protein 1;Plectin-1;Hemidesmosomal protein 1;Plectin-1;Hemidesmosomal protein 1;Plectin-1;Hemidesmosomal protein 1;Plectin-1;Plectin 1, intermediate filament binding protein 500kD…	PLEC1;PLEC1;PLEC1;PLEC1;PLEC1;hCG_1994702;PLEC1;PLEC1;PLEC1;PLEC1;hCG_1994701	Isoform 1 of Plectin;Isoform 2 of Plectin;Isoform 3 of Plectin;Isoform 6 of Plectin;Isoform 5 of Plectin;Isoform 4 of Plectin;Isoform 9 of Plectin;Isoform 8 of Plectin;Isoform 7 of Plectin	Q15149-1;Q15149;Q15149-2;Q15149-3;Q15149-6;Q15149-5;Q8WXV5;Q15149-4;Q15149-9;Q15149-8;Q15149-7;D3DWL0;Q96IE3	0.220799	0	0.000173677	-32.0951	3.54976e-34	202.19	0.220799	0	4.57353e-16	165.21	0.00940126	-15.3264	1.03163e-33	200.53		1	S	SVGSSSSYPISPA	CK1;GSK3	0.081	3.54976e-34	202.19	_pSSSVGSSSSYPISPAVSR_	S(0.221)S(0.221)S(0.221)VGS(0.039)S(0.039)S(0.039)S(0.221)Y(0.001)PISPAVSR	S(0)S(0)S(0)VGS(-7.58)S(-7.58)S(-7.58)S(0)Y(-22.51)PIS(-57.5)PAVS(-56.88)R	9	3	612.279
381	200	4406	4406		1532	1930;1931	4940	8757	TSenrich-100ughela-2	16089	4938	8754	TSenrich-100ughela-1	25047	IPI00014898;IPI00186711;IPI00398002;IPI00398778;IPI00398777;IPI00398779;IPI00398775;IPI00420096;IPI00398776	IPI00014898	IPI00014898	Hemidesmosomal protein 1;Plectin-1;Hemidesmosomal protein 1;Plectin-1;Hemidesmosomal protein 1;Plectin-1;Hemidesmosomal protein 1;Plectin-1;Hemidesmosomal protein 1;Plectin-1;HCG1994702;Plectin isoform 1b;Hemidesmosomal protein 1;Plectin-1;Hemidesmosomal protein 1;Plectin-1;Hemidesmosomal protein 1;Plectin-1;Hemidesmosomal protein 1;Plectin-1;Plectin 1, intermediate filament binding protein 500kD…	PLEC1;PLEC1;PLEC1;PLEC1;PLEC1;hCG_1994702;PLEC1;PLEC1;PLEC1;PLEC1;hCG_1994701	Isoform 1 of Plectin;Isoform 2 of Plectin;Isoform 3 of Plectin;Isoform 6 of Plectin;Isoform 5 of Plectin;Isoform 4 of Plectin;Isoform 9 of Plectin;Isoform 8 of Plectin;Isoform 7 of Plectin	Q15149-1;Q15149;Q15149-2;Q15149-3;Q15149-6;Q15149-5;Q8WXV5;Q15149-4;Q15149-9;Q15149-8;Q15149-7;D3DWL0;Q96IE3	1	52.4621	0.215944	-2.00869	6.62666e-15	156.4	1	52.4621	4.82534e-06	127.04						7	S	SRTQLASWSDPTE	CK1;CK2	0.117	6.62666e-15	156.4	_pTQLApSWpSDPpTEEpTGPVAGILDpTEpTLEK_	T(1)QLAS(1)WS(1)DPT(1)EET(1)GPVAGILDT(1)ET(1)LEK	T(52.46)QLAS(52.46)WS(52.46)DPT(52.46)EET(52.46)GPVAGILDT(52.46)ET(52.46)LEK	5	3	1150.06
382	200	4408	4408		1532	1930;1931	4940	8757	TSenrich-100ughela-2	16089	4938	8754	TSenrich-100ughela-1	25047	IPI00014898;IPI00186711;IPI00398002;IPI00398778;IPI00398777;IPI00398779;IPI00398775;IPI00420096;IPI00398776	IPI00014898	IPI00014898	Hemidesmosomal protein 1;Plectin-1;Hemidesmosomal protein 1;Plectin-1;Hemidesmosomal protein 1;Plectin-1;Hemidesmosomal protein 1;Plectin-1;Hemidesmosomal protein 1;Plectin-1;HCG1994702;Plectin isoform 1b;Hemidesmosomal protein 1;Plectin-1;Hemidesmosomal protein 1;Plectin-1;Hemidesmosomal protein 1;Plectin-1;Hemidesmosomal protein 1;Plectin-1;Plectin 1, intermediate filament binding protein 500kD…	PLEC1;PLEC1;PLEC1;PLEC1;PLEC1;hCG_1994702;PLEC1;PLEC1;PLEC1;PLEC1;hCG_1994701	Isoform 1 of Plectin;Isoform 2 of Plectin;Isoform 3 of Plectin;Isoform 6 of Plectin;Isoform 5 of Plectin;Isoform 4 of Plectin;Isoform 9 of Plectin;Isoform 8 of Plectin;Isoform 7 of Plectin	Q15149-1;Q15149;Q15149-2;Q15149-3;Q15149-6;Q15149-5;Q8WXV5;Q15149-4;Q15149-9;Q15149-8;Q15149-7;D3DWL0;Q96IE3	1	52.4621	0.215944	-2.00869	6.62666e-15	156.4	1	52.4621	4.82534e-06	127.04						7	S	TQLASWSDPTEET			6.62666e-15	156.4	_pTQLApSWpSDPpTEEpTGPVAGILDpTEpTLEK_	T(1)QLAS(1)WS(1)DPT(1)EET(1)GPVAGILDT(1)ET(1)LEK	T(52.46)QLAS(52.46)WS(52.46)DPT(52.46)EET(52.46)GPVAGILDT(52.46)ET(52.46)LEK	7	3	1150.06
383	202	27	27	Phosphoserine	1411	1779	4581	8143	TSenrich-100ughela-2	24036	4580	8142	TSenrich-100ughela-1	22795	IPI00015538;IPI00871931	IPI00015538	IPI00015538	nPKC-nu;Protein kinase C nu type;Protein kinase EPK2;Serine/threonine-protein kinase D3;cDNA FLJ14679 fis, clone NT2RP2004232, highly similar to Serine/threonine-protein kinase D3 (EC 2.7.11.13);nPKC-nu;Protein kinase C nu type;Protein kinase EPK2;Serine/threonine-protein kinase D3	EPK2;PRKCN;PRKD3;EPK2;PRKCN;PRKD3	Isoform 1 of Serine/threonine-protein kinase D3;Isoform 2 of Serine/threonine-protein kinase D3	O94806-1;O94806;B3KNJ2;O94806-2	0.904325	7.0896	0.999799	36.2447	4.00205e-11	154.78	0.904325	7.0896	0.00270091	102.91	0.88465	5.83731	0.0579406	85.095		2	S	AVLPAASPCSSPK	GSK3;Proline-directed	0.05	4.00205e-11	154.78	_SVLPTAIPAVLPAApSPCpSSPK_	SVLPTAIPAVLPAAS(0.904)PCS(0.585)S(0.51)PK	S(-78.58)VLPT(-74.75)AIPAVLPAAS(7.09)PCS(0.72)S(-0.72)PK	15	3	741.689
384	202	30	30	Phosphoserine	1411	1779	4581	8143	TSenrich-100ughela-2	24036	4580	8142	TSenrich-100ughela-1	22795	IPI00015538;IPI00871931	IPI00015538	IPI00015538	nPKC-nu;Protein kinase C nu type;Protein kinase EPK2;Serine/threonine-protein kinase D3;cDNA FLJ14679 fis, clone NT2RP2004232, highly similar to Serine/threonine-protein kinase D3 (EC 2.7.11.13);nPKC-nu;Protein kinase C nu type;Protein kinase EPK2;Serine/threonine-protein kinase D3	EPK2;PRKCN;PRKD3;EPK2;PRKCN;PRKD3	Isoform 1 of Serine/threonine-protein kinase D3;Isoform 2 of Serine/threonine-protein kinase D3	O94806-1;O94806;B3KNJ2;O94806-2	0.585178	0.718948	0.152068	-7.46899	4.00205e-11	154.78	0.585178	0.718948	0.00270091	102.91	0.557674	0	0.0579406	85.095		2	S	PAASPCSSPKTGL	CK1	0.081	4.00205e-11	154.78	_SVLPTAIPAVLPAApSPCpSSPK_	SVLPTAIPAVLPAAS(0.904)PCS(0.585)S(0.51)PK	S(-78.58)VLPT(-74.75)AIPAVLPAAS(7.09)PCS(0.72)S(-0.72)PK	18	3	741.689
385	204	43	43	Phosphoserine	457	589	1464	2511	TSenrich-100ughela-2	13247	1461	2507	TSenrich-100ughela-3	14889	IPI00015806;IPI00411594	IPI00015806	IPI00015806	General transcription factor 3C polypeptide 3;Transcription factor IIIC 102 kDa subunit;Transcription factor IIIC subunit gamma;General transcription factor 3C polypeptide 3;Transcription factor IIIC 102 kDa subunit;Transcription factor IIIC subunit gamma	GTF3C3;GTF3C3	Isoform 1 of General transcription factor 3C polypeptide 3;Isoform 2 of General transcription factor 3C polypeptide 3	Q9Y5Q9-1;Q9Y5Q9;Q9Y5Q9-2	1	77.29	1	74.5958	7.98469e-09	139.13	1	77.29	3.10851e-06	124.69	1	103.874	2.90874e-24	179.56		1	S	QEKGKLSAEENPD	CK2	0.117	2.90874e-24	179.56	_GKLpSAEENPDDSEVPSSSGINSTK_	GKLS(1)AEENPDDSEVPSSSGINSTK	GKLS(77.29)AEENPDDS(-77.29)EVPS(-86.91)S(-90.5)S(-96.33)GINS(-106.87)T(-106.87)K	4	2	1264.56
386	205	292	292	Phosphoserine	62	85;86	207	341	TSenrich-100ughela-2	23583	207	341	TSenrich-100ughela-2	23583	IPI00015894;IPI00902538	IPI00015894	IPI00015894	Binder of Rho GTPases 4;Cdc42 effector protein 4;CDC42 effector protein (Rho GTPase binding) 4, isoform CRA_a;cDNA FLJ14479 fis, clone MAMMA1002143, highly similar to Cdc42 effector protein 4 (Binder of Rho GTPases 4);cDNA, FLJ92905, Homo sapiens CDC42 effector protein (Rho GTPase binding) 4(CDC42EP4), mRNA;cDNA FLJ40516 fis, clone TESTI2046569, highly similar to Cdc42 effector protein 4 (Binder …	BORG4;CDC42EP4;CEP4;hCG_27835	Cdc42 effector protein 4;cDNA FLJ40516 fis, clone TESTI2046569, highly similar to Cdc42 effector protein 4	Q9H3Q1;B2R6D8;B3KUS7	1	75.953	1	65.9413	6.19924e-10	143.64	1	75.953	2.3871e-15	157.29						2	S	WAAAAPSPGSARS	Proline-directed	0.05	2.3871e-15	157.29	_AGPDLPSLPSHALEDEGWAAAAPpSPGpSAR_	AGPDLPSLPSHALEDEGWAAAAPS(1)PGS(1)AR	AGPDLPS(-75.95)LPS(-83.23)HALEDEGWAAAAPS(75.95)PGS(89.1)AR	24	3	996.437
387	205	295	295	Phosphoserine	62	85;86	207	341	TSenrich-100ughela-2	23583	207	341	TSenrich-100ughela-2	23583	IPI00015894;IPI00902538	IPI00015894	IPI00015894	Binder of Rho GTPases 4;Cdc42 effector protein 4;CDC42 effector protein (Rho GTPase binding) 4, isoform CRA_a;cDNA FLJ14479 fis, clone MAMMA1002143, highly similar to Cdc42 effector protein 4 (Binder of Rho GTPases 4);cDNA, FLJ92905, Homo sapiens CDC42 effector protein (Rho GTPase binding) 4(CDC42EP4), mRNA;cDNA FLJ40516 fis, clone TESTI2046569, highly similar to Cdc42 effector protein 4 (Binder …	BORG4;CDC42EP4;CEP4;hCG_27835	Cdc42 effector protein 4;cDNA FLJ40516 fis, clone TESTI2046569, highly similar to Cdc42 effector protein 4	Q9H3Q1;B2R6D8;B3KUS7	1	89.1028	1	70.9697	6.19924e-10	143.64	1	89.1028	2.3871e-15	157.29						2	S	AAPSPGSARSMGS	CK1	0.081	2.3871e-15	157.29	_AGPDLPSLPSHALEDEGWAAAAPpSPGpSAR_	AGPDLPSLPSHALEDEGWAAAAPS(1)PGS(1)AR	AGPDLPS(-75.95)LPS(-83.23)HALEDEGWAAAAPS(75.95)PGS(89.1)AR	27	3	996.437
388	207	121	121	Phosphoserine	943	1186	3099	5748	TSenrich-100ughela-3	11705	3099	5748	TSenrich-100ughela-3	11705	IPI00015953;IPI00477179	IPI00015953	IPI00015953	DEAD box protein 21;Gu-alpha;Nucleolar RNA helicase 2;Nucleolar RNA helicase Gu;Nucleolar RNA helicase II;RH II/Gu;DDX21 protein;DEAD/H(Asp-Glu-Ala-Asp/His)box polypeptide 21;DEAD box protein 21;Gu-alpha;Nucleolar RNA helicase 2;Nucleolar RNA helicase Gu;Nucleolar RNA helicase II;RH II/Gu	DDX21;OK/SW-cl.65;DDX21	Isoform 1 of Nucleolar RNA helicase 2;Isoform 2 of Nucleolar RNA helicase 2	Q9NR30-1;Q9NR30;Q3SWU7;Q8NI92;Q9NR30-2	1	127.17									1	127.17	0.00086062	127.17		1	S	TKNEEPSEEEIDA	CK2	0.117	0.00086062	127.17	_NEEPpSEEEIDAPKPK_	NEEPS(1)EEEIDAPKPK	NEEPS(127.17)EEEIDAPKPK	5	2	896.388
389	207	164	164	Phosphoserine	948	1191;1192;1193	3119	5784	TSenrich-100ughela-2	20179	3113	5776	TSenrich-100ughela-3	19659	IPI00015953;IPI00477179	IPI00015953	IPI00015953	DEAD box protein 21;Gu-alpha;Nucleolar RNA helicase 2;Nucleolar RNA helicase Gu;Nucleolar RNA helicase II;RH II/Gu;DDX21 protein;DEAD/H(Asp-Glu-Ala-Asp/His)box polypeptide 21;DEAD box protein 21;Gu-alpha;Nucleolar RNA helicase 2;Nucleolar RNA helicase Gu;Nucleolar RNA helicase II;RH II/Gu	DDX21;OK/SW-cl.65;DDX21	Isoform 1 of Nucleolar RNA helicase 2;Isoform 2 of Nucleolar RNA helicase 2	Q9NR30-1;Q9NR30;Q3SWU7;Q8NI92;Q9NR30-2	1	66.9199	0.258979	-5.87709	0.000238764	122.17	1	66.9199	0.0109461	115.6	1	75.3464	1.94099e-13	151.78		4	S	EPDCNPSEAASEE	GSK3	0.081	1.94099e-13	151.78	_NGFPHPEPDCNPpSEAApSEEpSNpSEIEQEIPVEQK_	NGFPHPEPDCNPS(1)EAAS(1)EES(1)NS(1)EIEQEIPVEQK	NGFPHPEPDCNPS(66.92)EAAS(66.92)EES(66.92)NS(66.92)EIEQEIPVEQK	13	3	1338.83
390	207	168	168	Phosphoserine	948	1191;1192;1193	3119	5784	TSenrich-100ughela-2	20179	3113	5776	TSenrich-100ughela-3	19659	IPI00015953;IPI00477179	IPI00015953	IPI00015953	DEAD box protein 21;Gu-alpha;Nucleolar RNA helicase 2;Nucleolar RNA helicase Gu;Nucleolar RNA helicase II;RH II/Gu;DDX21 protein;DEAD/H(Asp-Glu-Ala-Asp/His)box polypeptide 21;DEAD box protein 21;Gu-alpha;Nucleolar RNA helicase 2;Nucleolar RNA helicase Gu;Nucleolar RNA helicase II;RH II/Gu	DDX21;OK/SW-cl.65;DDX21	Isoform 1 of Nucleolar RNA helicase 2;Isoform 2 of Nucleolar RNA helicase 2	Q9NR30-1;Q9NR30;Q3SWU7;Q8NI92;Q9NR30-2	1	66.9199	0.984837	16.8905	0.000238764	122.17	1	66.9199	0.0109461	115.6	1	75.3464	1.94099e-13	151.78		4	S	NPSEAASEESNSE	CK1	0.143	1.94099e-13	151.78	_NGFPHPEPDCNPpSEAApSEEpSNpSEIEQEIPVEQK_	NGFPHPEPDCNPS(1)EAAS(1)EES(1)NS(1)EIEQEIPVEQK	NGFPHPEPDCNPS(66.92)EAAS(66.92)EES(66.92)NS(66.92)EIEQEIPVEQK	17	3	1338.83
391	207	171	171	Phosphoserine	948	1191;1192;1193	3119	5784	TSenrich-100ughela-2	20179	3113	5776	TSenrich-100ughela-3	19659	IPI00015953;IPI00477179	IPI00015953	IPI00015953	DEAD box protein 21;Gu-alpha;Nucleolar RNA helicase 2;Nucleolar RNA helicase Gu;Nucleolar RNA helicase II;RH II/Gu;DDX21 protein;DEAD/H(Asp-Glu-Ala-Asp/His)box polypeptide 21;DEAD box protein 21;Gu-alpha;Nucleolar RNA helicase 2;Nucleolar RNA helicase Gu;Nucleolar RNA helicase II;RH II/Gu	DDX21;OK/SW-cl.65;DDX21	Isoform 1 of Nucleolar RNA helicase 2;Isoform 2 of Nucleolar RNA helicase 2	Q9NR30-1;Q9NR30;Q3SWU7;Q8NI92;Q9NR30-2	1	66.9199	0.947663	11.5102	0.000238764	122.17	1	66.9199	0.0109461	115.6	1	75.3464	1.94099e-13	151.78		4	S	EAASEESNSEIEQ	CK1;CK2	0.081	1.94099e-13	151.78	_NGFPHPEPDCNPpSEAApSEEpSNpSEIEQEIPVEQK_	NGFPHPEPDCNPS(1)EAAS(1)EES(1)NS(1)EIEQEIPVEQK	NGFPHPEPDCNPS(66.92)EAAS(66.92)EES(66.92)NS(66.92)EIEQEIPVEQK	20	3	1338.83
392	207	173	173	Phosphoserine	948	1191;1192;1193	3119	5784	TSenrich-100ughela-2	20179	3113	5776	TSenrich-100ughela-3	19659	IPI00015953;IPI00477179	IPI00015953	IPI00015953	DEAD box protein 21;Gu-alpha;Nucleolar RNA helicase 2;Nucleolar RNA helicase Gu;Nucleolar RNA helicase II;RH II/Gu;DDX21 protein;DEAD/H(Asp-Glu-Ala-Asp/His)box polypeptide 21;DEAD box protein 21;Gu-alpha;Nucleolar RNA helicase 2;Nucleolar RNA helicase Gu;Nucleolar RNA helicase II;RH II/Gu	DDX21;OK/SW-cl.65;DDX21	Isoform 1 of Nucleolar RNA helicase 2;Isoform 2 of Nucleolar RNA helicase 2	Q9NR30-1;Q9NR30;Q3SWU7;Q8NI92;Q9NR30-2	1	66.9199	0.808521	5.87709	0.000238764	122.17	1	66.9199	0.0109461	115.6	1	75.3464	1.94099e-13	151.78		4	S	ASEESNSEIEQEI	CK2	0.117	1.94099e-13	151.78	_NGFPHPEPDCNPpSEAApSEEpSNpSEIEQEIPVEQK_	NGFPHPEPDCNPS(1)EAAS(1)EES(1)NS(1)EIEQEIPVEQK	NGFPHPEPDCNPS(66.92)EAAS(66.92)EES(66.92)NS(66.92)EIEQEIPVEQK	22	3	1338.83
393	208	409	409	Phosphoserine	1098	1363;1364;1365	3534	6519	TSenrich-100ughela-2	16092	3529	6510	TSenrich-100ughela-3	15082	IPI00016249;IPI00945864;IPI00942025;IPI00797887;IPI00554715;IPI00479630;IPI00947512;IPI00947266	IPI00016249	IPI00016249	Fragile X mental retardation syndrome-related protein 1;cDNA FLJ58644, highly similar to Fragile X mental retardation syndrome-related protein 1;cDNA FLJ58199, highly similar to Fragile X mental retardation syndrome-related protein 1;FXR1 protein;Fragile X mental retardation syndrome-related protein 1;Fragile X mental retardation syndrome-related protein 1;cDNA FLJ58772, highly similar to Fragile…	FXR1;FXR1;FXR1;FXR1	Isoform 1 of Fragile X mental retardation syndrome-related protein 1;cDNA FLJ58644, highly similar to Fragile X mental retardation syndrome-related protein 1;68 kDa protein;cDNA FLJ58199, highly similar to Fragile X mental retardation syndrome-related prot	P51114-1;P51114;B4DXZ6;B4DM78;Q14341;P51114-2;P51114-3;B4DGH9;B4DM21	0.84318	7.33433	0.845142	7.49419	2.41055e-09	139.67	0.84318	7.33433	5.49747e-13	152.86	0.872722	8.51506	1.94718e-13	158.11		1	S	SELSNPSETESER	CK1;CK2;GSK3	0.081	1.94718e-13	158.11	_RGPNYTSGYGTNSELSNPpSETESER_	RGPNYTSGYGTNSELSNPS(0.843)ET(0.156)ES(0.001)ER	RGPNY(-84.49)T(-84.19)S(-84.78)GY(-80.97)GT(-76.25)NS(-64.99)ELS(-47.5)NPS(7.33)ET(-7.33)ES(-29.12)ER	19	3	938.061
394	209	601	601	Phosphoserine	1445	1823	4695	8349	TSenrich-100ughela-2	20012	4692	8345	TSenrich-100ughela-3	20037	IPI00016250	IPI00016250	IPI00016250	Fragile X mental retardation syndrome-related protein 2;Fragile X mental retardation, autosomal homolog 2	FMR1L2;FXR2	Fragile X mental retardation syndrome-related protein 2	P51116;Q86V09	0.934652	9.09792	0.977396	16.3425	0.00142922	106.24	0.934652	9.09792	0.0282042	88.397	0.985341	18.271	0.000201665	118.52		2	S	GNRTDGSISGDRQ	PLK1	0.033462	0.000201665	118.52	_TDGpSIpSGDRQPVTVADYISR_	T(0.47)DGS(0.935)IS(0.595)GDRQPVTVADYISR	T(-1.17)DGS(9.1)IS(1.17)GDRQPVT(-38.41)VADY(-59.87)IS(-59.87)R	4	2	1149
395	209	603	603	Phosphoserine	1445	1823	4695	8349	TSenrich-100ughela-2	20012	4692	8345	TSenrich-100ughela-3	20037	IPI00016250	IPI00016250	IPI00016250	Fragile X mental retardation syndrome-related protein 2;Fragile X mental retardation, autosomal homolog 2	FMR1L2;FXR2	Fragile X mental retardation syndrome-related protein 2	P51116;Q86V09	0.595403	1.17429	0.996339	24.2486	0.00142922	106.24	0.595403	1.17429	0.0282042	88.397	0.999157	30.6719	0.000201665	118.52		2	S	RTDGSISGDRQPV			0.000201665	118.52	_TDGpSIpSGDRQPVTVADYISR_	T(0.47)DGS(0.935)IS(0.595)GDRQPVTVADYISR	T(-1.17)DGS(9.1)IS(1.17)GDRQPVT(-38.41)VADY(-59.87)IS(-59.87)R	6	2	1149
396	210	265	265	Phosphoserine	481;1525	624;1923	4927	8739	TSenrich-100ughela-2	21710	4926	8738	TSenrich-100ughela-1	20435	IPI00329547;IPI00016472	IPI00329547	IPI00329547	Zinc finger CCCH domain-containing protein 13;ZC3H13 protein;cDNA FLJ90443 fis, clone NT2RP3001061, highly similar to Zinc finger CCCH domain-containing protein 13;Zinc finger CCCH domain-containing protein 13;cDNA FLJ10953 fis, clone PLACE1000380, highly similar to Zinc finger CCCH domain-containing protein 13;ZC3H13 protein	KIAA0853;ZC3H13;KIAA0853;ZC3H13	Isoform 1 of Zinc finger CCCH domain-containing protein 13;Isoform 2 of Zinc finger CCCH domain-containing protein 13	Q5T200-1;Q5T200;A0PJJ2;B3KQG8;Q32Q34;Q5T200-2;B3KMG8;Q6PJ96	1	149.165	1	190.48	1.08586e-34	190.48	1	149.165	3.32136e-10	149.17	1	173.631	2.21808e-17	173.63		2	S	KGPRTPSPPPPIP	CAMK2;Proline-directed	0.042	1.08586e-34	190.48	_pTPpSPPPPIPEDIALGK_	T(1)PS(1)PPPPIPEDIALGK	T(149.17)PS(149.17)PPPPIPEDIALGK	3	2	894.915
397	210	238	238	Phosphoserine	781	991	2606	4805	TSenrich-100ughela-3	13434	2606	4805	TSenrich-100ughela-3	13434	IPI00329547;IPI00016472	IPI00329547	IPI00329547	Zinc finger CCCH domain-containing protein 13;ZC3H13 protein;cDNA FLJ90443 fis, clone NT2RP3001061, highly similar to Zinc finger CCCH domain-containing protein 13;Zinc finger CCCH domain-containing protein 13;cDNA FLJ10953 fis, clone PLACE1000380, highly similar to Zinc finger CCCH domain-containing protein 13;ZC3H13 protein	KIAA0853;ZC3H13;KIAA0853;ZC3H13	Isoform 1 of Zinc finger CCCH domain-containing protein 13;Isoform 2 of Zinc finger CCCH domain-containing protein 13	Q5T200-1;Q5T200;A0PJJ2;B3KQG8;Q32Q34;Q5T200-2;B3KMG8;Q6PJ96	0.999584	33.8457									0.999584	33.8457	7.0705e-18	170.85		2	S	KKDRKTSAVSSPL	CAMK2;GSK3;PKA	0.004788	7.0705e-18	170.85	_KTpSAVSpSPLLDQQR_	KTS(1)AVS(0.119)S(0.881)PLLDQQR	KT(-33.85)S(33.85)AVS(-8.71)S(8.71)PLLDQQR	3	2	845.384
398	210	242	242	Phosphoserine	781	991	2606	4805	TSenrich-100ughela-3	13434	2606	4805	TSenrich-100ughela-3	13434	IPI00329547;IPI00016472	IPI00329547	IPI00329547	Zinc finger CCCH domain-containing protein 13;ZC3H13 protein;cDNA FLJ90443 fis, clone NT2RP3001061, highly similar to Zinc finger CCCH domain-containing protein 13;Zinc finger CCCH domain-containing protein 13;cDNA FLJ10953 fis, clone PLACE1000380, highly similar to Zinc finger CCCH domain-containing protein 13;ZC3H13 protein	KIAA0853;ZC3H13;KIAA0853;ZC3H13	Isoform 1 of Zinc finger CCCH domain-containing protein 13;Isoform 2 of Zinc finger CCCH domain-containing protein 13	Q5T200-1;Q5T200;A0PJJ2;B3KQG8;Q32Q34;Q5T200-2;B3KMG8;Q6PJ96	0.881451	8.71315									0.881451	8.71315	7.0705e-18	170.85		2	S	KTSAVSSPLLDQQ	CK1;ERK/MAPK;Polo box;Proline-directed	0.0034	7.0705e-18	170.85	_KTpSAVSpSPLLDQQR_	KTS(1)AVS(0.119)S(0.881)PLLDQQR	KT(-33.85)S(33.85)AVS(-8.71)S(8.71)PLLDQQR	7	2	845.384
399	210	1452	1452		812	1033	2736	5084	TSenrich-100ughela-2	26509	2736	5084	TSenrich-100ughela-2	26509	IPI00329547;IPI00016472	IPI00329547	IPI00329547	Zinc finger CCCH domain-containing protein 13;ZC3H13 protein;cDNA FLJ90443 fis, clone NT2RP3001061, highly similar to Zinc finger CCCH domain-containing protein 13;Zinc finger CCCH domain-containing protein 13;cDNA FLJ10953 fis, clone PLACE1000380, highly similar to Zinc finger CCCH domain-containing protein 13;ZC3H13 protein	KIAA0853;ZC3H13;KIAA0853;ZC3H13	Isoform 1 of Zinc finger CCCH domain-containing protein 13;Isoform 2 of Zinc finger CCCH domain-containing protein 13	Q5T200-1;Q5T200;A0PJJ2;B3KQG8;Q32Q34;Q5T200-2;B3KMG8;Q6PJ96	0.86192	7.66655	0.945958	11.5011	0.0434008	105.63	0.86192	7.66655	4.0664e-08	138.98						3	S	KLDDAHSLGSGAG			4.0664e-08	138.98	_LDDAHpSLGpSGAGEGYEPIpSDDELDEILAGDAEK_	LDDAHS(0.862)LGS(0.945)GAGEGY(0.193)EPIS(1)DDELDEILAGDAEK	LDDAHS(7.67)LGS(11.66)GAGEGY(-7.67)EPIS(60.38)DDELDEILAGDAEK	6	3	1210.14
400	210	1455	1455		812	1033	2736	5084	TSenrich-100ughela-2	26509	2736	5084	TSenrich-100ughela-2	26509	IPI00329547;IPI00016472	IPI00329547	IPI00329547	Zinc finger CCCH domain-containing protein 13;ZC3H13 protein;cDNA FLJ90443 fis, clone NT2RP3001061, highly similar to Zinc finger CCCH domain-containing protein 13;Zinc finger CCCH domain-containing protein 13;cDNA FLJ10953 fis, clone PLACE1000380, highly similar to Zinc finger CCCH domain-containing protein 13;ZC3H13 protein	KIAA0853;ZC3H13;KIAA0853;ZC3H13	Isoform 1 of Zinc finger CCCH domain-containing protein 13;Isoform 2 of Zinc finger CCCH domain-containing protein 13	Q5T200-1;Q5T200;A0PJJ2;B3KQG8;Q32Q34;Q5T200-2;B3KMG8;Q6PJ96	0.944917	11.6577	0.817608	6.2183	0.0434008	105.63	0.944917	11.6577	4.0664e-08	138.98						3	S	DAHSLGSGAGEGY	CK1	0.081	4.0664e-08	138.98	_LDDAHpSLGpSGAGEGYEPIpSDDELDEILAGDAEK_	LDDAHS(0.862)LGS(0.945)GAGEGY(0.193)EPIS(1)DDELDEILAGDAEK	LDDAHS(7.67)LGS(11.66)GAGEGY(-7.67)EPIS(60.38)DDELDEILAGDAEK	9	3	1210.14
401	210	1465	1465		812	1033	2736	5084	TSenrich-100ughela-2	26509	2736	5084	TSenrich-100ughela-2	26509	IPI00329547;IPI00016472	IPI00329547	IPI00329547	Zinc finger CCCH domain-containing protein 13;ZC3H13 protein;cDNA FLJ90443 fis, clone NT2RP3001061, highly similar to Zinc finger CCCH domain-containing protein 13;Zinc finger CCCH domain-containing protein 13;cDNA FLJ10953 fis, clone PLACE1000380, highly similar to Zinc finger CCCH domain-containing protein 13;ZC3H13 protein	KIAA0853;ZC3H13;KIAA0853;ZC3H13	Isoform 1 of Zinc finger CCCH domain-containing protein 13;Isoform 2 of Zinc finger CCCH domain-containing protein 13	Q5T200-1;Q5T200;A0PJJ2;B3KQG8;Q32Q34;Q5T200-2;B3KMG8;Q6PJ96	0.999999	60.3827	0.999978	45.4022	0.0434008	105.63	0.999999	60.3827	4.0664e-08	138.98						3	S	EGYEPISDDELDE	CK2	0.117	4.0664e-08	138.98	_LDDAHpSLGpSGAGEGYEPIpSDDELDEILAGDAEK_	LDDAHS(0.862)LGS(0.945)GAGEGY(0.193)EPIS(1)DDELDEILAGDAEK	LDDAHS(7.67)LGS(11.66)GAGEGY(-7.67)EPIS(60.38)DDELDEILAGDAEK	19	3	1210.14
402	211	268	268		150	199	482	739	TSenrich-100ughela-2	27424	480	737	TSenrich-100ughela-3	27663	IPI00148057;IPI00828194;IPI00878545;IPI00016570	IPI00148057	IPI00148057	Bromodomain-containing protein 8;p120;Skeletal muscle abundant protein;Skeletal muscle abundant protein 2;Thyroid hormone receptor coactivating protein of 120 kDa;cDNA FLJ78370, highly similar to Homo sapiens bromodomain containing 8 (BRD8), transcript variant 1, mRNA;cDNA, FLJ92650, highly similar to Homo sapiens bromodomain containing 8 (BRD8), mRNA;cDNA FLJ58241, highly similar to Homo sapiens…	BRD8;SMAP;SMAP2;BRD8;SMAP;SMAP2;BRD8;SMAP;SMAP2	Isoform 2 of Bromodomain-containing protein 8;Isoform 4 of Bromodomain-containing protein 8;Protein;Isoform 3 of Bromodomain-containing protein 8	Q9H0E9-2;Q9H0E9;A8K1N6;B2R5V7;B4DSD6;Q9H0E9-4;Q9H0E9-3	0.988191	19.2263	0.994831	22.8437	0.201034	64.948	0.988191	19.2263	0.258788	60.82	0.997259	25.6092	0.0436236	90.799		2	S	KATPPPSPLLSEL	CK1;ERK/MAPK;GSK3;Proline-directed;WW GroupIV	0.0023175	0.0436236	90.799	_ApTPPPpSPLLSELLK_	AT(1)PPPS(0.988)PLLS(0.012)ELLK	AT(51.41)PPPS(19.23)PLLS(-19.23)ELLK	6	2	811.896
403	212	137	137	Phosphoserine	1454	1833	4716	8376	TSenrich-100ughela-2	13587	4716	8376	TSenrich-100ughela-2	13587	IPI00016671;IPI00644521	IPI00016671	IPI00016671	Zinc finger protein 446;Zinc finger protein with KRAB and SCAN domains 20;ZNF446 protein;Putative uncharacterized protein DKFZp434L2027	ZKSCAN20;ZNF446;DKFZp434L2027	Zinc finger protein 446;36 kDa protein	Q9NWS9;Q96AF5;Q9UFF2	0.996285	24.9001	0.792794	6.23054	0.109613	87.194	0.996285	24.9001	1.47762e-10	146.53	0.941379	12.2068	0.00051546	115.11		2	S	TEEPLGSPHPSGT	GSK3;Proline-directed	0.05	1.47762e-10	146.53	_TEEPLGpSPHPSGTVEpSPGEGPQDTR_	TEEPLGS(0.996)PHPS(0.004)GT(0.002)VES(0.998)PGEGPQDTR	T(-57.31)EEPLGS(24.9)PHPS(-24.9)GT(-27.5)VES(27.5)PGEGPQDT(-59.84)R	7	3	907.707
404	212	146	146		1454	1833	4716	8376	TSenrich-100ughela-2	13587	4716	8376	TSenrich-100ughela-2	13587	IPI00016671;IPI00644521	IPI00016671	IPI00016671	Zinc finger protein 446;Zinc finger protein with KRAB and SCAN domains 20;ZNF446 protein;Putative uncharacterized protein DKFZp434L2027	ZKSCAN20;ZNF446;DKFZp434L2027	Zinc finger protein 446;36 kDa protein	Q9NWS9;Q96AF5;Q9UFF2	0.997817	27.5027	0.870681	10.1009	0.109613	87.194	0.997817	27.5027	1.47762e-10	146.53	0.97785	18.9954	0.00051546	115.11		2	S	PSGTVESPGEGPQ	CK2;ERK/MAPK;Proline-directed	0.0034	1.47762e-10	146.53	_TEEPLGpSPHPSGTVEpSPGEGPQDTR_	TEEPLGS(0.996)PHPS(0.004)GT(0.002)VES(0.998)PGEGPQDTR	T(-57.31)EEPLGS(24.9)PHPS(-24.9)GT(-27.5)VES(27.5)PGEGPQDT(-59.84)R	16	3	907.707
405	213	39	39	Phosphoserine	1052	1312	3378	6201	TSenrich-100ughela-2	16583	3378	6201	TSenrich-100ughela-2	16583	IPI00646839;IPI00016910;IPI00922360;IPI00910003;IPI00939953;IPI00873286	IPI00646839	IPI00646839	Putative uncharacterized protein EIF3CL;eIF3 p110;Eukaryotic translation initiation factor 3 subunit 8;Eukaryotic translation initiation factor 3 subunit C;Cell migration-inducing protein 17;cDNA FLJ30804 fis, clone FEBRA2001267, highly similar to Eukaryotic translation initiation factor 3 subunit 8;cDNA FLJ55450, highly similar to Eukaryotic translation initiation factor 3 subunit 8;cDNA FLJ5440…	EIF3CL;EIF3C;EIF3CL;EIF3S8;EIF3CL;EIF3CL	Uncharacterized protein;Eukaryotic translation initiation factor 3 subunit C;cDNA FLJ54488, highly similar to Eukaryotic translation initiation factor 3 subunit 8;Uncharacterized protein;Uncharacterized protein;cDNA FLJ55750, highly similar to Eukaryotic t	B5ME19;Q99613;A1KYQ7;B3KNZ4;B4DVQ5;B4E1D5;B4E2Z6;Q3B7B9;B4DDN4;B4DVU3;C9J1F3;C9JJ55;B4DRU0	0.999928	41.4442	0.990971	20.4042	0.569804	38.985	0.999928	41.4442	0.0734356	79.687						1	S	KQPLLLSEDEEDT	CK2;NEK6	0.076	0.0734356	79.687	_QPLLLpSEDEEDTKR_	QPLLLS(1)EDEEDTKR	QPLLLS(41.44)EDEEDT(-41.44)KR	6	3	584.94
406	214	217	217	Phosphoserine	625;626	793;794	1973	3425	TSenrich-100ughela-2	19649	1970	3421	TSenrich-100ughela-2	19665	IPI00017450;IPI00911069	IPI00017450	IPI00017450	General transcription factor IIF 74 kDa subunit;General transcription factor IIF subunit 1;Transcription initiation factor IIF subunit alpha;Transcription initiation factor RAP74;GTF2F1 protein;cDNA FLJ50288, highly similar to Transcription initiation factor IIF alpha subunit (EC 2.7.11.1)	GTF2F1;RAP74	General transcription factor IIF subunit 1;cDNA FLJ50288, highly similar to Transcription initiation factor IIF alpha subunit	P35269;Q6IBK5;B4DXY2	1	101.31	1	98.5892	0.0356425	98.589	1	101.31	9.01617e-07	130.56	1	78.0717	0.00129919	109.78		4	S	EDDLEMSSDASDA	GSK3;NEK6	0.076	9.01617e-07	130.56	_IHDLEDDLEMpSpSDApSDApSGEEGGRVPK_	IHDLEDDLEMS(1)S(1)DAS(1)DAS(1)GEEGGRVPK	IHDLEDDLEMS(101.31)S(101.31)DAS(101.31)DAS(101.31)GEEGGRVPK	11	3	1060.38
407	214	218	218	Phosphoserine	625;626	793;794	1973	3425	TSenrich-100ughela-2	19649	1970	3421	TSenrich-100ughela-2	19665	IPI00017450;IPI00911069	IPI00017450	IPI00017450	General transcription factor IIF 74 kDa subunit;General transcription factor IIF subunit 1;Transcription initiation factor IIF subunit alpha;Transcription initiation factor RAP74;GTF2F1 protein;cDNA FLJ50288, highly similar to Transcription initiation factor IIF alpha subunit (EC 2.7.11.1)	GTF2F1;RAP74	General transcription factor IIF subunit 1;cDNA FLJ50288, highly similar to Transcription initiation factor IIF alpha subunit	P35269;Q6IBK5;B4DXY2	1	101.31	1	98.5892	0.0356425	98.589	1	101.31	9.01617e-07	130.56	1	78.0717	0.00129919	109.78		4	S	DDLEMSSDASDAS			9.01617e-07	130.56	_IHDLEDDLEMpSpSDApSDApSGEEGGRVPK_	IHDLEDDLEMS(1)S(1)DAS(1)DAS(1)GEEGGRVPK	IHDLEDDLEMS(101.31)S(101.31)DAS(101.31)DAS(101.31)GEEGGRVPK	12	3	1060.38
408	214	221	221	Phosphoserine	625;626	793;794	1973	3425	TSenrich-100ughela-2	19649	1970	3421	TSenrich-100ughela-2	19665	IPI00017450;IPI00911069	IPI00017450	IPI00017450	General transcription factor IIF 74 kDa subunit;General transcription factor IIF subunit 1;Transcription initiation factor IIF subunit alpha;Transcription initiation factor RAP74;GTF2F1 protein;cDNA FLJ50288, highly similar to Transcription initiation factor IIF alpha subunit (EC 2.7.11.1)	GTF2F1;RAP74	General transcription factor IIF subunit 1;cDNA FLJ50288, highly similar to Transcription initiation factor IIF alpha subunit	P35269;Q6IBK5;B4DXY2	1	101.31	1	98.5892	0.0356425	98.589	1	101.31	9.01617e-07	130.56	1	78.0717	0.00129919	109.78		4	S	EMSSDASDASGEE	CK1	0.081	9.01617e-07	130.56	_IHDLEDDLEMpSpSDApSDApSGEEGGRVPK_	IHDLEDDLEMS(1)S(1)DAS(1)DAS(1)GEEGGRVPK	IHDLEDDLEMS(101.31)S(101.31)DAS(101.31)DAS(101.31)GEEGGRVPK	15	3	1060.38
409	214	224	224	Phosphoserine	625;626	793;794	1973	3425	TSenrich-100ughela-2	19649	1970	3421	TSenrich-100ughela-2	19665	IPI00017450;IPI00911069	IPI00017450	IPI00017450	General transcription factor IIF 74 kDa subunit;General transcription factor IIF subunit 1;Transcription initiation factor IIF subunit alpha;Transcription initiation factor RAP74;GTF2F1 protein;cDNA FLJ50288, highly similar to Transcription initiation factor IIF alpha subunit (EC 2.7.11.1)	GTF2F1;RAP74	General transcription factor IIF subunit 1;cDNA FLJ50288, highly similar to Transcription initiation factor IIF alpha subunit	P35269;Q6IBK5;B4DXY2	1	101.31	1	98.5892	0.0356425	98.589	1	101.31	9.01617e-07	130.56	1	78.0717	0.00129919	109.78		4	S	SDASDASGEEGGR	CK1;CK2	0.081	9.01617e-07	130.56	_IHDLEDDLEMpSpSDApSDApSGEEGGRVPK_	IHDLEDDLEMS(1)S(1)DAS(1)DAS(1)GEEGGRVPK	IHDLEDDLEMS(101.31)S(101.31)DAS(101.31)DAS(101.31)GEEGGRVPK	18	3	1060.38
[truncated: 1,829 more rows]
[truncated: 8 more columns]

## Sheet: Table S4
Table S4. Phospho(STY) sites obtained by second Ti4+-IMAC enrichment step from HeLa cell lysate tryptic digest.
id	Protein Group IDs	Positions	Position	Known Site	Peptide IDs	Mod. Peptide IDs	Best Localization Evidence ID	Best Localization MS/MS ID	Best Localization Raw File	Best Localization Scan Number	Best Identification Evidence ID	Best Identification MS/MS ID	Best Identification Raw File	Best Identification Scan Number	Proteins	Leading Proteins	Protein	Protein Names	Gene Names	Protein Descriptions	Uniprot	Localization Prob	Score Diff	Localization Prob Experiment1	Score Diff Experiment1	PEP Experiment1	Score Experiment1	Localization Prob Experiment2	Score Diff Experiment2	PEP Experiment2	Score Experiment2	Localization Prob Experiment3	Score Diff Experiment3	PEP Experiment3	Score Experiment3	Diagnostic peak	Number of Phospho (STY)	Amino Acid	Sequence Window	Motifs	Random Match	PEP	Score	Modified Sequence	Phospho (STY) Probabilities	Phospho (STY) Score Diffs	Position in peptide	Charge	m/z
[truncated: 3,474 more rows]
[truncated: 8 more columns]

## Sheet: Table S5
Table S5. Phospho(STY) sites obtained by TiO2 material from HeLa cell lysate tryptic digest.
[truncated: 2,173 more rows]
[truncated: 8 more columns]

## Sheet: Table S6
Table S6.Phospho(STY) sites obtained by Ti4+-IMAC material from HeLa cell lysate tryptic digest.
[truncated: 4,038 more rows]
[truncated: 8 more columns]
